# Supplementary material
Source: PubMed Central journal article supplement (PMC5699474)
Supplement: NIHMS915269-supplement-Supporting_Information.pdf [file NIHMS915269-supplement-Supporting_Information.pdf]

## Table of Contents

|                                                                                                             |       |
|-------------------------------------------------------------------------------------------------------------|-------|
| <b>General Information</b> .....                                                                            | S-2   |
| <b>Survey of Ligands and Nickel Sources</b> .....                                                           | S-3   |
| <b>Experimental Procedures</b> .....                                                                        | S-5   |
| I. <i>Procedure for Preparation of Alkenyl Substrates</i> .....                                             | S-5   |
| II. <i>Procedures for Preparation of 1,2-diamine Ligands</i> .....                                          | S-8   |
| III. <i>Representative Procedure for Conjunctive Cross Coupling</i> .....                                   | S-10  |
| IV. <i>Procedures and Characterization for Conjunctive Cross-Coupling Product</i> .....                     | S-13  |
| V. <i>Procedures and Characterization for Transformations of Secondary<br/>        9-BBN Products</i> ..... | S-46  |
| VI. <i>Deuterium-Labeling Experiments</i> .....                                                             | S-53  |
| VII. <i>Stoichiometric Experiments</i> .....                                                                | S-55  |
| <b>Spectral Data</b> .....                                                                                  | S-57  |
| <b>Crystallographic Data</b> .....                                                                          | S-132 |

## General Information

<sup>1</sup>H NMR spectra were recorded on either a Varian Gemini-500 (500 MHz), Varian Gemini-600 (600 MHz), or Varian Inova-500 (500 MHz) spectrometer. Chemical shifts are reported in ppm with the solvent resonance as the internal standard (CDCl<sub>3</sub>: 7.24 ppm). Data are reported as follows: chemical shift, integration, multiplicity (s = singlet, d = doublet, t = triplet, q = quartet, p = pentet, m = multiplet), and coupling constants (Hz). <sup>13</sup>C NMR spectra were recorded on either a Varian Gemini-500 (125 MHz), Varian Gemini-600 (150 MHz) or a Varian Inova-500 (125 MHz) spectrometer with complete proton decoupling. Chemical shifts are reported in ppm with the solvent resonance as the internal standard (CDCl<sub>3</sub>: 77.16 ppm). Chemical shifts are reported in ppm using phosphoric acid as the external standard (H<sub>3</sub>PO<sub>4</sub>: 0.0 ppm). <sup>11</sup>B NMR spectra were recorded on a Varian Gemini-500 (128 MHz) spectrometer. <sup>19</sup>F NMR spectra were recorded on a Varian Gemini-500 (470 MHz) spectrometer. Infrared (IR) spectra were recorded on a Bruker alpha-P Spectrometer. Frequencies are reported in wavenumbers (cm<sup>-1</sup>) as follows: strong (s), broad (br), medium (m), and weak (w). Optical rotations were measured on a Rudolph Analytical Research Autopol IV Polarimeter. High-resolution mass spectrometry (DART+) was performed at the Mass Spectrometry Facility, Boston College, Chestnut Hill, MA. Liquid chromatography was performed using forced flow (flash chromatography) on silica gel (SiO<sub>2</sub>, 230 x 450 Mesh) purchased from Silicycle. Thin layer chromatography (TLC) was performed on 25 μm silica gel glass backed plates from Silicycle. Visualization was performed using ultraviolet light (254 nm), ceric ammonium molybdate (CAM) in ethanol or phosphomolybdic acid, and cerium(IV) sulfate in ethanol with sulfuric acid (Seebach).

Analytical chiral supercritical fluid chromatography (SFC) was performed on a TharSFC Method Station II equipped with Waters 2998 Photodiode Array Detector with isopropanol as the modifier.

All reactions were conducted in oven- or flame-dried glassware under an inert atmosphere of nitrogen or argon. Tetrahydrofuran (THF), diethyl ether (Et<sub>2</sub>O), dichloromethane (DCM) and toluene were purified using Pure Solv MD-4 solvent purification system, from Innovative Technology, Inc., by passing the solvent through two activated alumina columns after purging with argon. Nickel(II) acetylacetonate was purchased from Acros Organics, (1*R*,2*R*)-*N,N'*-Dimethyl-1,2-diphenylethane-1,2-diamine (**(*R,R*)-L6**) was purchased from Astatech Inc., and 9-Borabicyclo[3.3.1]nonane 0.5M solution in THF was purchased from Alfa Aesar (of note, cross coupling reactions resulted in slightly diminished yields when a BBN solution from Sigma Aldrich was employed, or when borane reagents were prepared from BBN dimer). All other reagents were purchased from Sigma Aldrich, Alfa Aesar, Oakwood Chemicals, Combi-Blocks, or Acros Organics and used without further purification.



## Expanded Survey of Ligands

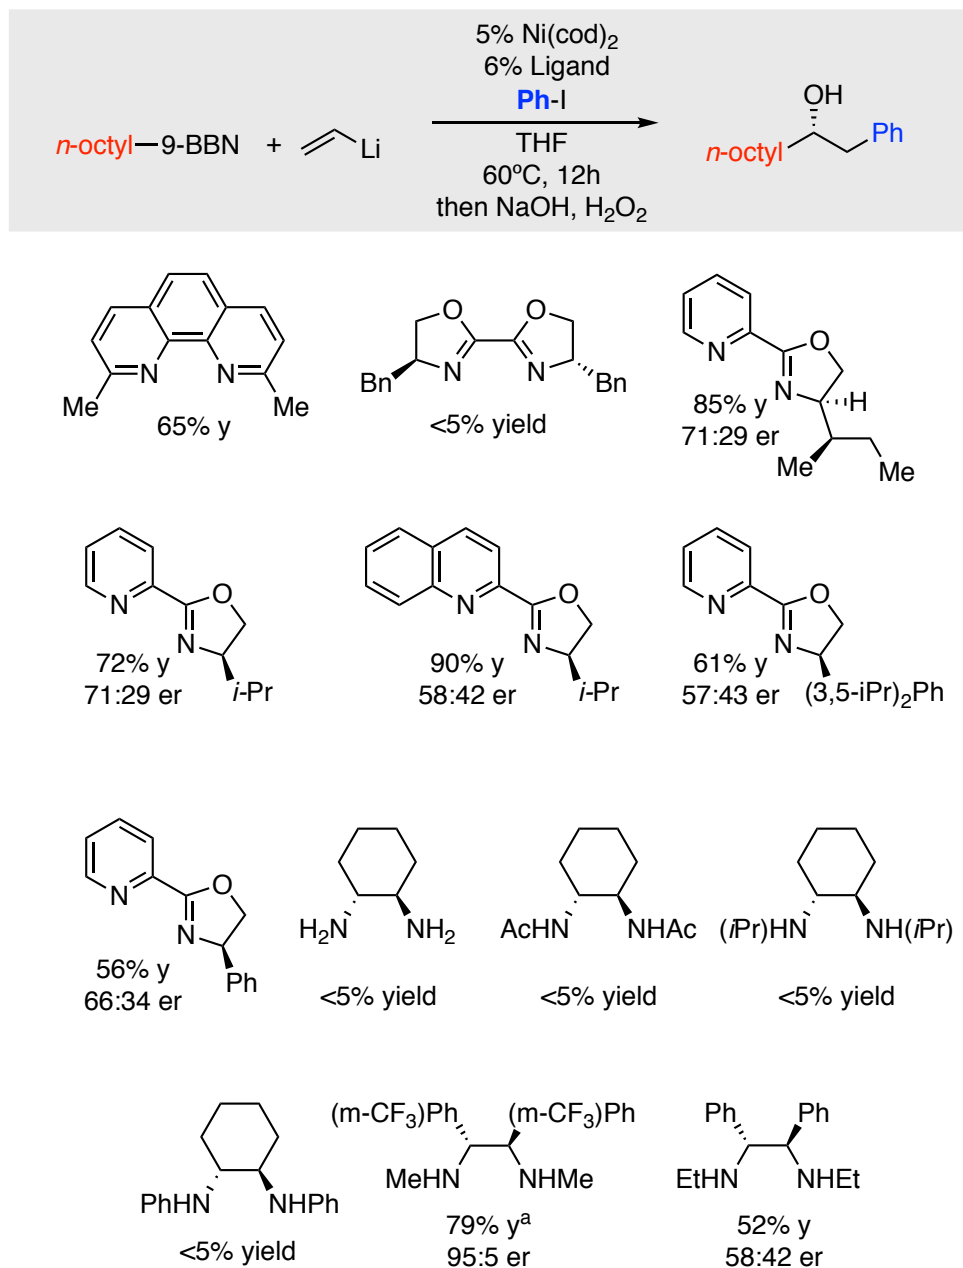

Conditions: reactions were run according to **procedure A** with 9-BBN in THF (0.5 M, 0.22 mmol, 1.1 equiv.), 1-octene (0.22 mmol, 1.1 equiv.), halide-free vinyl lithium in THF (0.20 mmol, 1.0 equiv.), a solution of [Ni] (0.010 mmol, 0.050 equiv.) and ligand (0.012 mmol, 0.060 equiv.) in THF (0.4 mL), and iodobenzene (0.20 mmol, 1.00 equiv.). a: Ni(acac)<sub>2</sub> used instead of Ni(cod)<sub>2</sub>.

## Survey of Nickel Sources

An evaluation of Ni salts showed a slight increase in yield when using Ni(acac)<sub>2</sub>, presumably because the latter is more efficient at pre-complexing to the diamine ligand (a solution of Ni(cod)<sub>2</sub> and **L6** in THF-*d*<sub>8</sub> was monitored by <sup>1</sup>H NMR, and no change in the starting materials was observed over several hours) Using a slight excess of boron ‘ate’ to help reduce the Ni(II) pre-catalyst (making the electrophile the limiting reagent) resulted in a further increase in yield. Results from the studies for the reaction of n-octyl-BBN, vinyl-Li, and iodobenzene are summarized in the table below (**SI-table 2**).

**SI-table 2**

| Ni source                   | Ligand    | Yield | e.r.  |
|-----------------------------|-----------|-------|-------|
| Ni(COD) <sub>2</sub>        | <b>L5</b> | 60%   | 93:07 |
| Ni(COD) <sub>2</sub>        | <b>L6</b> | 62%   | 95:05 |
| Ni(acac) <sub>2</sub>       | <b>L6</b> | 71%   | 95:05 |
| Ni(Br) <sub>2</sub> (glyme) | <b>L6</b> | 58%   | 95:05 |
| Ni(I) <sub>2</sub>          | <b>L6</b> | <5%   | N/A   |
| NiCO <sub>3</sub>           | <b>L6</b> | <5%   | N/A   |
| Ni(acac) <sub>2</sub> *     | <b>L6</b> | 80%   | 95:05 |

\*1.1 equiv. of vinyl-Li and 1.2 of octyl-BBN

Conditions: reactions were run according to **procedure A** with 9-BBN in THF (0.5 M, 0.22 mmol, 1.1 equiv.), 1-octene (0.22 mmol, 1.1 equiv.), halide-free vinyl lithium in THF (0.20 mmol, 1.0 equiv.), a solution of [Ni] (0.010 mmol, 0.050 equiv.) and ligand (0.012 mmol, 0.060 equiv.) in THF (0.4 mL), and iodobenzene (0.20 mmol, 1.00 equiv.).

## Experimental Procedures

### I. Procedure for Preparation of Alkenyl Substrates

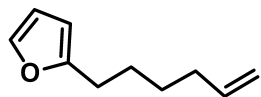

**2-(hex-5-enyl)furan (S-24).** The title compound was prepared according to the procedure reported in the literature.<sup>1</sup> All spectral data was in accordance with previously published results.

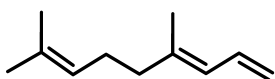

**(E)-4,8-dimethylnona-1,3,7-triene (S-21).** The title compound was synthesized in two steps starting with oxidation of geraniol as reported by Stahl *et al.*<sup>2</sup> followed by Wittig olefination. The spectral data was in accordance with the literature.<sup>3</sup>

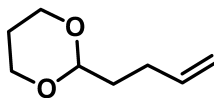

**2-(but-3-en-1-yl)-1,3-dioxane (S-13).** Prepared from 4-pentenal according to the procedure reported by Karimi *et al.*<sup>4</sup> The spectral data was in accordance with the literature.<sup>5</sup>

**OTBDPS**

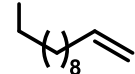

**tert-butyl(diphenyl)(undec-10-en-1-yloxy)silane (S-14).** To a flame-dried round bottom flask equipped with a stir bar was added imidazole (1.02g, 15 mmol). The flask was purged with nitrogen for 5 minutes and dichloromethane (20 mL), undec-10-en-ol (10 mmol), and Et<sub>3</sub>N (2.09 mL, 15 mmol) were then added. *tert*-Butyl(chloro)diphenylsilane (2.57 mL, 10 mmol) was added to the reaction mixture drop-wise. The reaction was allowed to stir at room temperature for 16 hours, after which water (20 mL) was added to the reaction. The water layer was extracted 3 times using dichloromethane. The organic layers were combined, dried over sodium sulfate, filtered, and condensed under vacuum. The crude product was purified by silica gel column chromatography (Hexanes, stain in KMnO<sub>4</sub>) to afford a clear yellow oil (3.92 g, 96% yield).

<sup>1</sup> S. Hobson, R. Marquez, *Org. Biomol. Chem.* **2006**, *4*, 3808.

<sup>2</sup> J. Hoover, S. Stahl, *J. Am. Chem. Soc.* **2011**, *133*, 16901.

<sup>3</sup> H. Davies, Ø Loe, D. Stafford, *Org. Lett.* **2005**, *7*, 5561.

<sup>4</sup> H. Firouzabadi, N. Iranpoor, B. Karimi, *Synlett.* **1999**, 321.

<sup>5</sup> B. Lin, Y. Zhao, Y. Lai, T. Loh, *Angew. Chem. Int. Ed.* **2012**, *51*, 8041.

**$^1\text{H}$  NMR** (500 MHz,  $\text{CDCl}_3$ )  $\delta$  7.70-7.66 (m, 4H), 7.44-7.35 (m, 6H), 5.82 (ddt,  $J = 17.0, 10.2, 6.7$  Hz, 1H), 5.00 (dd,  $J = 17.0, 1.4$  Hz, 1H), 4.94 (dd,  $J = 10.2, 1.4$  Hz, 1H), 3.66 (t,  $J = 6.5$  Hz, 1H), 2.08-2.01 (m, 2H), 1.60-1.52 (m, 2H), 1.41-1.23 (m, 14H), 1.05 (s, 9H).  **$^{13}\text{C}$**  (150 MHz,  $\text{CDCl}_3$ )  $\delta$  139.35, 135.74, 134.36, 129.62, 127.72, 114.28, 64.17, 33.99, 32.75, 29.72, 29.60, 29.52, 29.29, 29.12, 27.05, 25.94, 19.38. **IR** (neat)  $\nu_{\text{max}}$  2926 (m), 2865 (m), 1427 (m), 1107 (s), 909 (m), 823 (m), 738 (m), 700 (s), 688 (m), 613 (m), 504 (s), 488 (m)  $\text{cm}^{-1}$ . **HRMS** (DART) for  $\text{C}_{27}\text{H}_{41}\text{OSi}$   $[\text{M}+\text{H}]^+$ : Calc'd: 409.2927, found: 409.2926.

**Preparation of (*R*)-*tert*-butyl(pent-4-en-2-yloxy)diphenylsilane and (*S*)-*tert*-butyl(pent-4-en-2-yloxy)diphenylsilane.**

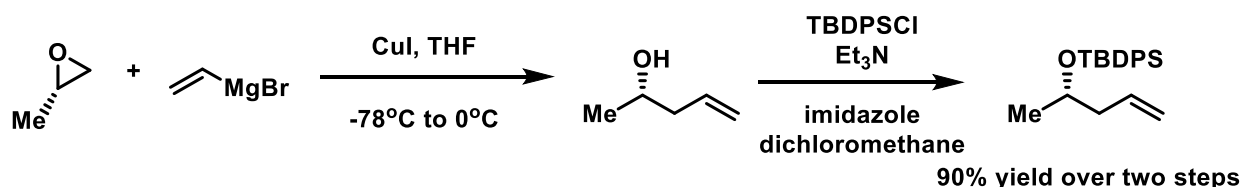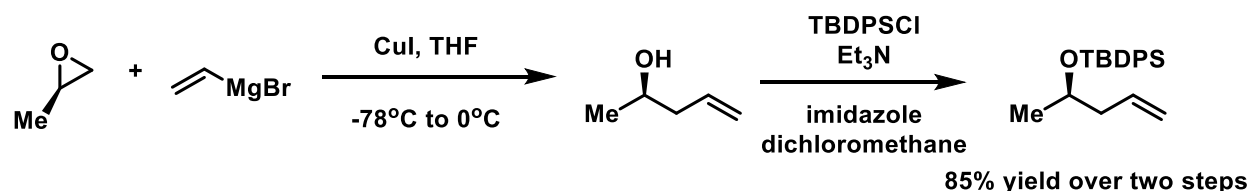

In an argon filled glovebox, a flame-dried round bottom flask equipped with a stir bar was charged with CuI (381 mg, 2.0 mmol). The flask was sealed with a rubber septum and taken outside. THF (30 mL) was added under nitrogen. The reaction was cooled down to  $-78^\circ\text{C}$  with a dry ice/ acetone bath and vinyl magnesium bromide (1M in THF, 20 mL, 20 mmol) was then added dropwise. The reaction was allowed to stir at  $-78^\circ\text{C}$  for another 15 min, and propylene oxide (0.70 mL, 10 mmol) was added in one portion. The reaction was allowed to stir at  $-78^\circ\text{C}$  for one hour and at room temperature for another hour. Upon completion the reaction flask was cooled to  $0^\circ\text{C}$  and a saturated aqueous ammonium chloride solution was added to the mixture. The organic layer was collected and the aqueous layer was extracted twice with diethyl ether. The organic layers were combined, dried over sodium sulfate, filtered, and concentrated in vacuo. The residue was taken to next step without further purification.

To a flame-dried round bottom flask equipped with a stir bar was added imidazole (1.02 g, 15 mmol). The flask was then purged with nitrogen for 10 min. A solution of Crude product and trimethylamine (2.09 mL, 15 mmol) in dichloromethane (15 mL) was added, followed by dropwise addition of *tert*-butyl(chloro)diphenylsilane (2.60 mL, 10 mmol). The reaction was allowed to stir at room temperature for 16 hours, after which water (20 mL) was added. The organic layer was extracted 3 times using dichloromethane. The organic layers were combined, dried over sodium sulfate, filtered, and condensed under vacuum to afford the crude product.

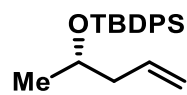

**(*R*)-tert-butyl(pent-4-en-2-yloxy)diphenylsilane (S-26)**. The crude material was purified through silica gel column chromatography (hexane, stain in KMnO<sub>4</sub>) to afford the product as a yellow oil (2.93g, 90% yield over 2 steps). Spectral data were in accordance with previous literature reports.<sup>6</sup>

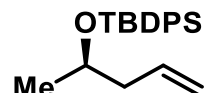

**(*S*)-tert-butyl(pent-4-en-2-yloxy)diphenylsilane (S-27)**. The crude material was purified through silica gel column chromatography (hexane, stain in KMnO<sub>4</sub>) to afford the product as a yellow oil (2.76g, 85% yield over 2 steps). Spectral data were in accordance with previous literature report.<sup>7</sup>

---

<sup>6</sup> B. Thirupathi, R. Gundapaneni, D. Mohapatra, *Synlett*. **2011**, 2667.

<sup>7</sup> S. Bujaranipalli, S. Das, *Tetrahedron Lett.* **2015**, *56*, 3747.

## II. Procedures for Preparation of diamine Ligands

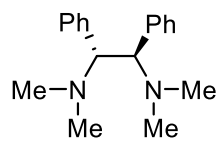

**(1R,2R)-N1,N1,N2,N2-tetramethyl-1,2-diphenylethane-1,2-diamine (L7).**

The title compound was prepared according to the procedure reported in the literature.<sup>8</sup> All spectral data was in accordance with the literature.<sup>8</sup>

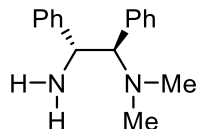

**(1R,2R)-N,N-dimethyl-1,2-diphenylethane-1,2-diamine (L8).**

The title compound was prepared according to the procedure reported in the literature.<sup>9</sup> All spectral data was in accordance with the literature.<sup>10</sup>

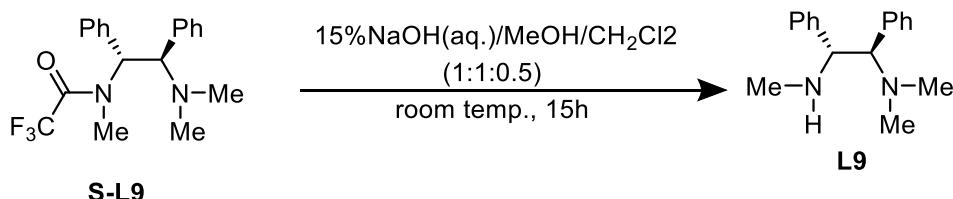

**S-L9**

**L9**

**(1R,2R)-N1,N1,N2-trimethyl-1,2-diphenylethane-1,2-diamine (L9).** The title compound was prepared from hydrolysis of **S-L9**.<sup>9</sup> To a scintillation vial equipped with a magnetic stir bar was added **S-L16** (30mg, 0.0856 mmol, 1.0 equiv.) and CH<sub>2</sub>Cl<sub>2</sub> (0.5 mL). 15% aq. NaOH (1 mL) and MeOH (1 mL) were added to the vial at room temperature. The reaction mixture was stirred vigorously for 15 hours at room temperature. At the end of 15 hours, H<sub>2</sub>O (10 mL) was added. The aqueous phase was extracted with ethyl acetate (10 mLx3) and the combined organic phase was washed with brine (20 mL), dried over magnesium sulfate, filtered, and concentrated under reduced pressure. The crude mixture was purified by silica gel chromatography (10% MeOH and 2% Et<sub>3</sub>N in DCM, stained with KMnO<sub>4</sub>) to afford **L9**<sup>11</sup> as a white solid (11 mg, 50% yield).

<sup>1</sup>H NMR (500 MHz, CDCl<sub>3</sub>) δ 7.32-6.98 (m, 10H), 4.00 (d, *J* = 11.0 Hz, 1H), 3.85 (d, *J* = 11.0 Hz, 1H), 2.36 (s, 3H), 2.22 (s, 6H). HRMS (ESI) for C<sub>17</sub>H<sub>23</sub>N<sub>2</sub> [M+H]<sup>+</sup>: Calc'd: 255.1861, found: 255.1867.

<sup>8</sup> S. Benson, P. Cai, M. Colon, M. Haiza, M. Tokles, J. Snyder, *J. Org. Chem.* **1988**, *53*, 5335.

<sup>9</sup> M. Shang, X. Wang, S. Koo, J. Youn, J. Chan, W. Yao, B. Hastings, M. Wasa, *J. Am. Chem. Soc.* **2017**, *139*, 95.

<sup>10</sup> H. Yue, H. Huang, G. Bian, H. Zong, F. Li, L. Song., *Tetrahedron: Asymmetry* **2014**, *25*, 170.

<sup>11</sup> T. Honjo, S. Sano, M. Shiro, Y. Nagao, *Angew. Chem. Int. Ed.* **2005**, 5838.

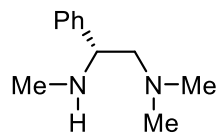

**(R)-N1,N2,N2-trimethyl-1-phenylethane-1,2-diamine (L10).** The title compound was prepared according to the procedure reported in the literature.<sup>12</sup> All spectral data was in accordance with the literature.<sup>12</sup>

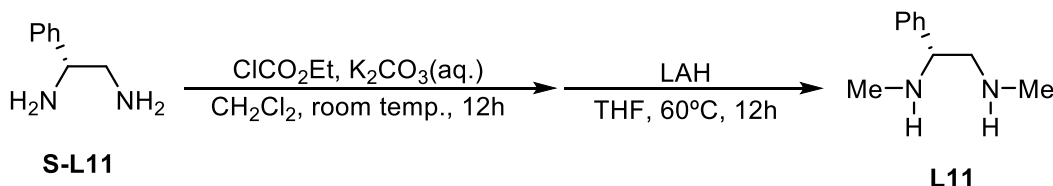

**Diamine (L11).** Diamine **S-L11** was prepared by LAH reduction of commercially available D(-)-phenylglycinamide following literature procedures.<sup>13</sup> The yield for the following reactions was not optimized. **S-L11** (430 mg, 3.16 mmol) was dissolved in THF (25 mL) in a round bottom flask flushed with argon and cooled to 0 °C. Potassium carbonate (1.09 g, 7.89 mmol, 476.38  $\mu$ L) in water (3 mL) was added to the flask followed ethylchloroformate (2.06 g, 18.94 mmol, 1.80 mL). The resulting two-phase mixture was stirred vigorously at ambient temperature for 12 h.  $\text{Na}_2\text{SO}_4$  was added directly to the reaction mixture which was filtered through a fritted funnel, and solids were further washed with EtOAc. The filtrate was concentrated in vacuo and the crude material was purified by silica gel chromatography (1%  $\text{Et}_3\text{N}$  in DCM, stained in CAM) to afford ethyl-N-[2-(ethoxycarbonylamino)-1-phenyl-ethyl]carbamate **S2-L11** (124.8 mg, 0.45 mmol, 14.10% yield) as a white solid.  $^1\text{H NMR}$  (500 MHz,  $\text{CDCl}_3$ )  $\delta$  7.37 – 7.28 (m, 5H), 5.58 (s, 1H), 4.91 (s, 1H), 4.81 (s, 1H), 4.16 – 4.07 (m, 4H), 3.51 (s, 3H), 1.24 (t,  $J = 6.5$  Hz, 6H).

Step 2: In an argon filled glovebox, Lithium Aluminum Hydride was placed in a two-neck round bottom flask equipped with a stir-bar and waterless reflux condenser. X mL of THF were added to the flask which was cooled to 0 °C. Once cooled, ethyl-N-[2-(ethoxycarbonylamino)-1-phenyl-ethyl]carbamate (124.8 mg, 0.45 mmol, 1.0 equiv.) was added as a solution in 5 mL of THF dropwise, the mixture was allowed to warm to room temperature over an hour and then heated to reflux for 12 hours. The flask was then cooled to 0 °C and carefully quenched with x mL of  $\text{H}_2\text{O}$  followed by addition of x mL of a 3M NaOH solution. The mixture was stirred at room temperature for 1 hour before addition of  $\text{Na}_2\text{SO}_4$ . The suspension was then filtered through celite, the solids washed with EtOAc and the filtrate concentrated in vacuo. The crude material was purified by silica gel chromatography (1-10% MeOH in  $\text{CH}_2\text{Cl}_2$  with 1%  $\text{Et}_3\text{N}$ , stain in ninhydrin) to afford the product as a pale yellow oil (21 mg, 29% yield). All spectral data was in accordance with the literature.<sup>14</sup>

<sup>12</sup> S. de Sousa, P. O' Brien, C. Pilgram, *Tetrahedron* **2002**, *58*, 4643.

<sup>13</sup> Y. Belokon, L.Pritula, V. Tararov, V. Bakhmutov, Y. Struchkov, *J. Chem. Soc., Dalton Trans.* **1990**, 179.

<sup>14</sup> G. Buono, C. Triantaphylides, G. Peiffer, F. Petit, *ChemInform.* **1983**, 14.

### III. General Procedure for Conjunctive Cross-Coupling

#### Procedure A

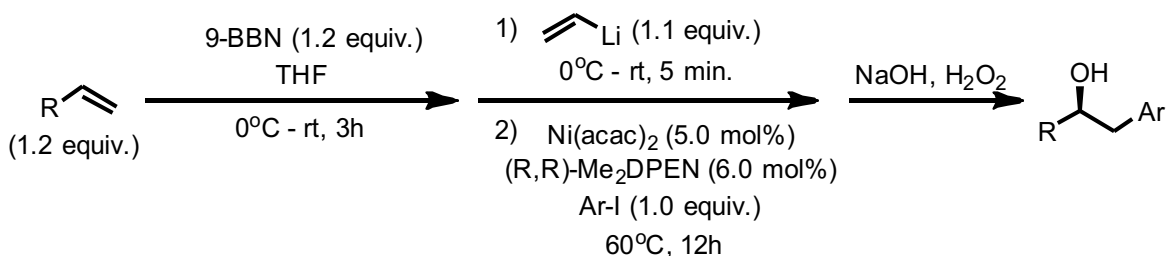

In a glovebox, under argon, an oven-dried 2-dram vial equipped with a magnetic stir bar was charged with a solution of 9-BBN in THF (0.48 mL, 0.5 M, 0.24 mmol, 1.20 equiv.). The vial was cooled to  $0^\circ\text{C}$ , and the olefin (0.24 mmol, 1.20 equiv.) was added. The reaction mixture was allowed to warm to room temperature and stir for 3 hours before being cooled back to  $0^\circ\text{C}$ . Vinyl lithium (for synthesis of halide free vinyl lithium see ref<sup>15</sup>) in THF (0.15 mL, 1.47 M, 0.22 mmol, 1.10 equiv.) was added to the reaction mixture which was then warmed to room temperature and stirred for 5 minutes. Meanwhile a solution of  $\text{Ni}(\text{acac})_2$  (0.010 mmol, 0.050 equiv.) and **(R,R)-L6** (0.012 mmol, 0.060 equiv.) in THF (0.4 mL), was allowed to complex for 5 minutes under inert atmosphere. The catalyst solution was added to the boron 'ate' mixture at room temperature followed by addition of aryl iodide (0.20 mmol, 1.00 equiv.) The reaction vial was sealed with a septum cap, taken out of the glovebox and heated at 60 for 12 hours, after which point the reaction mixture was cooled to  $0^\circ\text{C}$  and 30%  $\text{H}_2\text{O}_2$  (0.5 mL) were added along with 3 M NaOH (0.5 mL). The reaction mixture was allowed to warm up to room temperature and stirred for 3 hours. Aq. saturated  $\text{Na}_2\text{S}_2\text{O}_3$  (1 mL) solution was then added to quench the reaction. The aqueous phase was extracted with  $\text{Et}_2\text{O}$  (2 x 2 mL), followed by  $\text{EtOAc}$  (2 x 2 mL). The combined organic layers were dried over  $\text{MgSO}_4$ , filtered, concentrated under reduced pressure, and subsequently purified via silica gel column chromatography to provide the desired products.

**Note:** In all cases, a stock solution of 9-BBN derivatives could be prepared and stored in a freezer for as long as one month, before addition of vinyl lithium, without any diminishing yield or stereoselectivity.

**Note:** The reaction can be carried out using aryl-bromides instead of aryl-iodides by following the same method described in **procedure A** with a slight modification. The reaction requires

<sup>15</sup>E. Edelstein, S. Namirembe, J. Morken, *J. Am. Chem. Soc.* **2017**, *139*, 5027.



anhydrous NaI (33.0 mg, 0.22 mmol, 1.1 equiv.) which can be added to the solution of 9-BBN and alkene in THF, prior to addition of vinyl lithium. These reactions resulted in slightly lower yields (PhBr: 63% yield and PhI 75% yield) and no erosion in selectivity.

### Procedure B

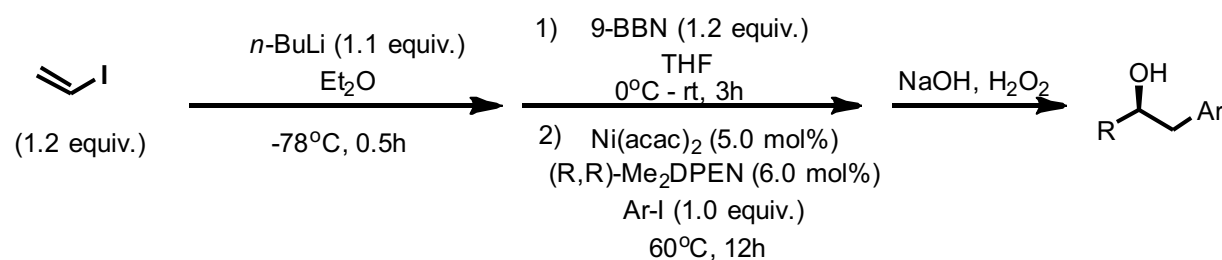

In an argon filled glovebox, an oven-dried 2-dram vial equipped with a magnetic stir bar was charged with a solution of 9-BBN in THF (0.48 mL, 0.5 M, 0.24 mmol, 1.20 equiv.), cooled to 0°C, and the olefin (0.24 mmol, 1.20 equiv.) was added. The reaction mixture was allowed to warm to room temperature and stir for an additional 3 hours. Meanwhile, inside the glovebox, a separate oven-dried 2 dram vial was charged with vinyl iodide (37.0 mg, 0.24 mmol, 1.2 equiv.) and dissolved in 0.4 mL of Et<sub>2</sub>O. The vial was brought outside and cooled to -78°C. A solution of n-butyllithium (90 μL, 0.22 mmol, 1.10 equiv.) was added drop-wise to the reaction vial and the mixture was stirred at -78°C for 30 minutes. At this point the alkyl-BBN solution generated previously was added to the vial at -78°C in a drop-wise fashion. The reaction vessel was warmed to room temperature and the solvent was carefully removed under reduced pressure through a Schlenk line. The vial was brought back inside the glovebox and the contents were dissolved in 0.4 mL of THF. Meanwhile, a solution of Ni(acac)<sub>2</sub> (0.010 mmol, 0.050 equiv.) and (**R,R**)-L6 (0.012 mmol, 0.060 equiv.) in THF (0.4 mL), was allowed to complex for 5 minutes under inert atmosphere. The catalyst solution was added to the boron 'ate' mixture at room temperature followed by addition of aryl iodide (0.20 mmol, 1.00 equiv.) The reaction vial was sealed with a septum cap and taken out of glovebox and heated at 60 for 12 hours, after which point the reaction mixture was cooled to 0°C, and 30% H<sub>2</sub>O<sub>2</sub> (0.5 mL) were added along with 3 M NaOH (0.5 mL). The reaction mixture was allowed to warm up to room temperature and stirred for 3 hours. Aq. saturated Na<sub>2</sub>S<sub>2</sub>O<sub>3</sub> (1 mL) solution was then added to quench the reaction mixture. The aqueous phase was extracted with Et<sub>2</sub>O (2 x 2 mL), followed by EtOAc (2 x 2 mL). The combined organic layer was dried over MgSO<sub>4</sub>, filtered, concentrated under reduced pressure, and subsequently purified via silica gel column chromatography to provide the desired products.

**Procedure for large scale synthesis of (*S*)-1-phenyldecan-2-ol (1).**

The opposite enantiomer of ligand was used for this reaction, resulting in equal and opposite enantioselectivity in the product.

A 250 mL two-neck round bottom flask equipped with stirbar and reflux condenser was backfilled with N<sub>2</sub>, charged with 9-BBN solution in THF (19.2 mL, 0.5 M, 9.6 mmol, 1.20 equiv.) and cooled to 0 °C. 1-Octene (1.51 mL, 9.60 mmol, 1.20 equiv.) was added and the reaction mixture was warmed to room temperature and stirred for 3 hours. Meanwhile, in an argon filled glove box, Ni(acac)<sub>2</sub> (102.76 mg, 0.40 mmol, 0.05 equiv.) and (*S, S*)-L6 (115.36 mg, 0.48 mmol, 0.06 equiv.) were placed in a 20 mL vial, dissolved in 16 mL of THF and allowed to stir for 2 hours at room temperature.

Outside the glove box, the octyl-BBN solution was cooled to 0 °C and a solution of vinyl lithium in THF (4.89 mL, 1.8 M, 8.80 mmol, 1.1 equiv.) was added to the flask drop-wise. The solution was warmed to room temperature and stirred for 20 minutes, after which the catalyst solution was added (the solution should go from light blue to, yellow/red), followed by addition of iodobenzene (0.90 mL, 8.0 mmol, 1.00 equiv.). The reaction mixture was heated at 60 °C for 12 hours, then it was cooled to 0 °C and 16 mL of aqueous 3M NaOH solution was added, followed by 16 mL of 30% H<sub>2</sub>O<sub>2</sub>. The biphasic mixture was allowed to warm to room temperature over 4 hours with vigorous stirring. The mixture was cooled to 0 °C once more and 16 mL of aq. saturated Na<sub>2</sub>S<sub>2</sub>O<sub>3</sub> solution was added. The organic layer was extracted twice with 100 mL of Et<sub>2</sub>O and twice with 100 mL of EtOAc, dried over Na<sub>2</sub>SO<sub>4</sub>, filtered and concentrated in vacuo. The crude mixture was purified by column chromatography (50% DCM in pentane, stain in CAM) to afford the product as a colorless oil (1.31 g, 70% yield).

#### IV. Characterization of Conjunctive Cross Coupling Products and Analysis of Stereochemistry

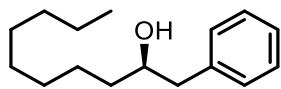

**(R)-1-phenyldecan-2-ol (1).** The reaction was performed according to the general **procedure A** with 9-BBN in THF (0.48 mL, 0.5 M, 0.24 mmol, 1.20 equiv.), 1-octene (26.9 mg, 0.24 mmol, 1.20 equiv.), halide-free vinylolithium in THF (0.15 mL, 1.47 M, 0.22 mmol, 1.10 equiv.), a solution of Ni(acac)<sub>2</sub> (2.57 mg, 0.010 mmol, 0.050 equiv.) and **(R,R)-L6** (2.88 mg, 0.012 mmol, 0.060 equiv.) in THF (0.4 mL), iodobenzene (40.8 mg, 0.20 mmol, 1.00 equiv.). The crude mixture was purified by column chromatography (50% DCM in pentane, stain in CAM) to afford the product as a colorless oil (37 mg, 79% yield). <sup>1</sup>H NMR (600 MHz, CDCl<sub>3</sub>) δ 7.33-7.30 (m, 2H), 7.25-7.12 (m, 3H), 3.84-3.8 (m, 1H), 2.84 (dd, *J* = 13.6, 4.2 Hz, 1H), 2.65 (dd, *J* = 13.6, 8.4 Hz, 1H), 1.53-1.25 (m, 15 H), 0.89 (t, *J* = 6.7 Hz, 3H). <sup>13</sup>C NMR (126 MHz, CDCl<sub>3</sub>) δ 138.81, 129.56, 128.69, 126.56, 72.84, 44.22, 37.02, 32.03, 29.81, 29.73, 29.42, 25.91, 22.82, 14.25. IR (neat) ν<sub>max</sub> 3373.2 (br, s), 3027.7 (w, s), 2923.2 (s), 2853.8 (s), 1495.4 (s), 1454.1 (s), 1377.2 (s), 1126.3 (s), 1031.3 (m), 744.0 (s), 699.7 (s). HRMS (DART) for C<sub>16</sub>H<sub>30</sub>NO (M+NH<sub>4</sub>)<sup>+</sup>: Calc'd: 252.2337, found: 252.2327. [α]<sub>D</sub><sup>20</sup> = -1.02 (*c* = 1.4, CHCl<sub>3</sub>, *l* = 50 mm).

### Analysis of Stereochemistry:

Racemic compound was prepared according to the general **procedure A** with 2,2'-bipy (6 mol%) as the ligand. Absolute stereochemistry was assigned by analogy (see product **34**, **19**).

Chiral SFC (Chiracel OD-H, 2% IPA, 3 mL/min, 100 bar, 35 °C, 210-289 nm) – analysis of (R)-1-phenyldecan-2-ol and (R)-1-phenyldecan-2-ol (from gram scale reaction).

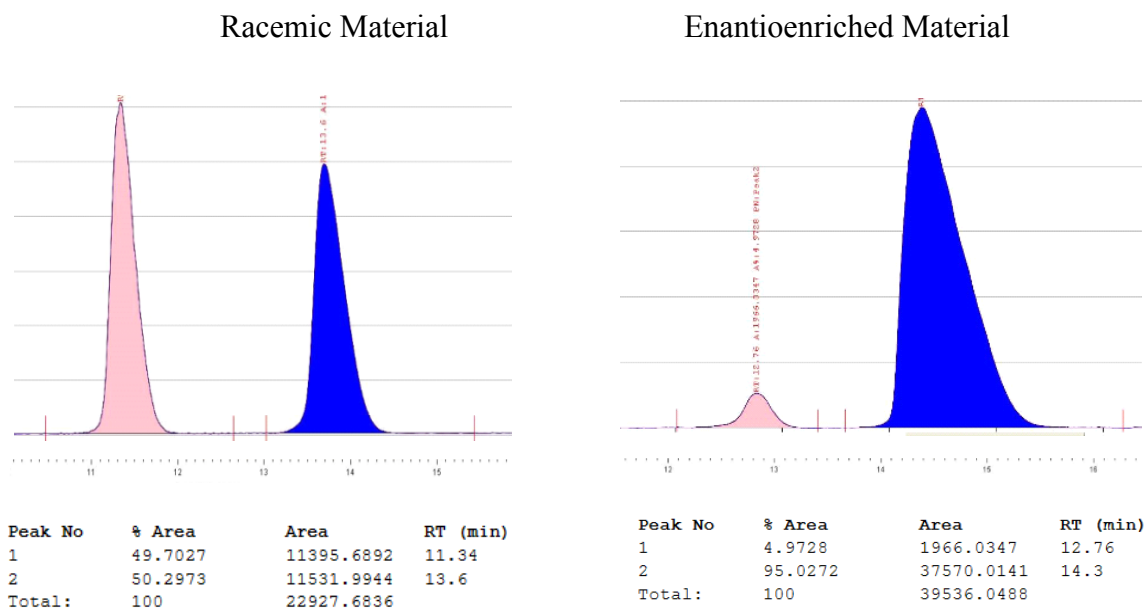

### Enantioenriched Material from Gram Scale Reaction

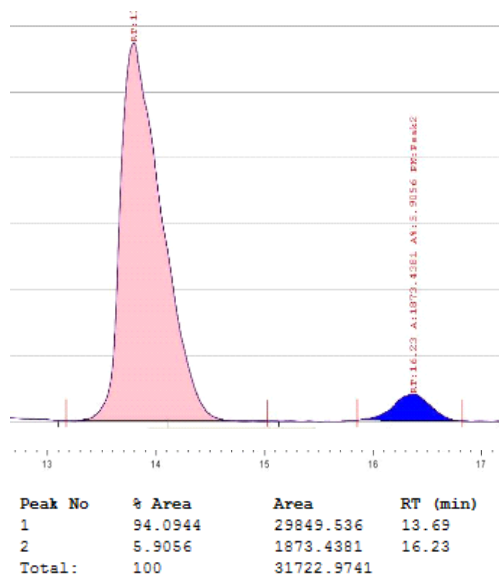

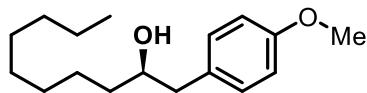

**(R)-1-(4-methoxyphenyl)decan-2-ol (2).** The reaction was performed according to the general **procedure A** with 9-BBN in THF (0.48 mL, 0.5 M, 0.24 mmol, 1.20 equiv.), 1-octene (26.9 mg, 0.24 mmol, 1.20 equiv.), halide-free vinylolithium in THF (0.15 mL, 1.47 M, 0.22 mmol, 1.10 equiv.), a solution of Ni(acac)<sub>2</sub> (2.57 mg, 0.010 mmol, 0.050 equiv.) and **(R,R)-L6** (2.88 mg, 0.012 mmol, 0.060 equiv.) in THF (0.4 mL), 4-iodoanisole (46.8 mg, 0.20 mmol, 1.00 equiv.) The crude mixture was purified by silica gel chromatography (80% DCM in hexanes, stained with CAM) to afford a white solid (22.7 mg, 43% yield).

<sup>1</sup>H NMR (500 MHz, CDCl<sub>3</sub>) δ 7.13 (d, *J* = 8.7 Hz, 2H), 6.86 (d, *J* = 8.7 Hz, 2H), 3.82-3.73 (m, 4H), 2.78 (dd, *J* = 13.7, 4.2 Hz, 1H), 2.58 (dd, *J* = 13.7, 8.4 Hz, 1H), 1.55-1.22 (m, 14H), 0.88 (t, *J* = 7.0 Hz, 3H). <sup>13</sup>C NMR (150 MHz, CDCl<sub>3</sub>) δ 158.43, 130.73, 130.51, 114.15, 72.92, 55.41, 43.25, 36.93, 32.02, 29.82, 29.73, 29.42, 25.92, 22.81, 14.25. IR (neat) ν<sub>max</sub> 3382.00 (br, w), 2923.76 (s), 2853.47 (s), 1612.24 (m), 1511.44 (s), 1464.39 (m), 1441.35 (m), 1299.98 (m), 1245.73 (s), 1177.39 (m), 1038.10 (s), 817.67 (m), 570.95 (w), 521.58 (w) cm<sup>-1</sup>. HRMS (DART) for C<sub>17</sub>H<sub>27</sub>O [M+H-H<sub>2</sub>O]<sup>+</sup>: Calc'd: 247.2062, found: 247.2072. [α]<sub>D</sub><sup>20</sup> = -4.8678 (*c* = 10.6, CHCl<sub>3</sub>, *l* = 50 mm).

### Analysis of Stereochemistry:

Racemic compound was prepared according to the general **procedure A** with 2,2'-bipy (6 mol%) as the ligand. Absolute stereochemistry was assigned by analogy (see product **34, 19**).

Chiral SFC (Chiracel OJ-H, 5% IPA, 3 mL/min, 100 bar, 35 °C, 210-289 nm) – analysis of (R)-1-(4-methoxyphenyl)decan-2-ol.

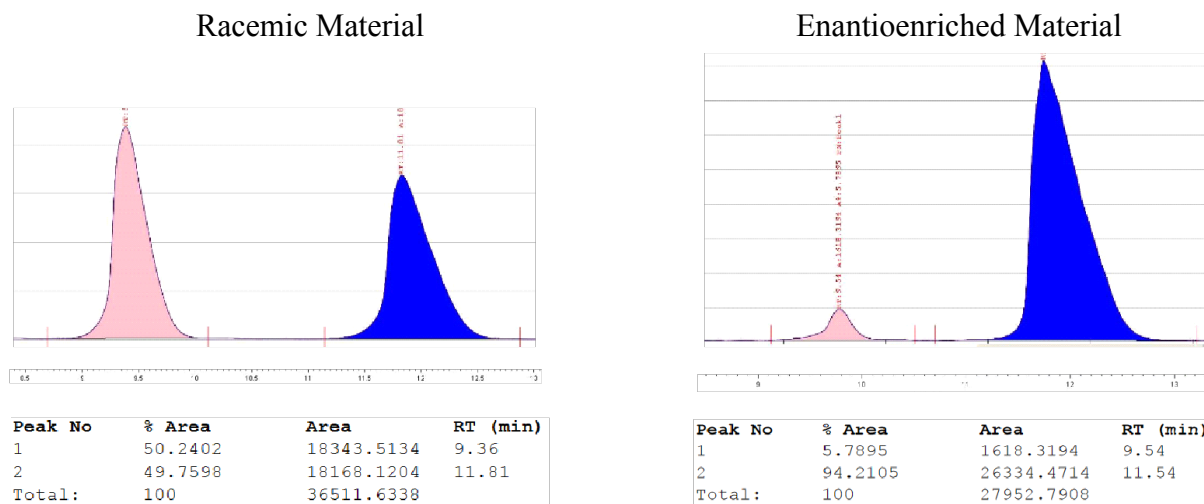

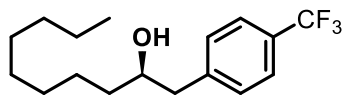

**(R)-1-(4-(trifluoromethyl)phenyl)decan-2-ol (3).** The reaction was performed according to the general **procedure B** with 9-BBN in THF (0.48 mL, 0.5 M, 0.24 mmol, 1.20 equiv.), 1-octene (26.9 mg, 0.24 mmol, 1.20 equiv.), halide-free vinylolithium in THF (0.15 mL, 1.47 M, 0.22 mmol, 1.10 equiv.), a solution of Ni(acac)<sub>2</sub> (2.57 mg, 0.010 mmol, 0.050 equiv.) and **(R,R)-L6** (2.88 mg, 0.012 mmol, 0.060 equiv.) in THF (0.4 mL), 4-iodobenzotrifluoride (54.4 mg, 0.20 mmol, 1.00 equiv.) The crude mixture was purified by silica gel chromatography (80% DCM in hexanes, stained with CAM) to afford a white solid (42.4 mg, 70% yield).

<sup>1</sup>H NMR (500 MHz, CDCl<sub>3</sub>) δ 7.56 (d, *J* = 8.0 Hz, 2H), 7.34 (d, *J* = 8.0 Hz, 2H), 3.89-3.80 (m, 1H), 2.87 (dd, *J* = 13.6, 4.3 Hz, 1H), 2.73 (dd, *J* = 13.6, 8.3 Hz, 1H), 1.57-1.22 (m, 14H), 0.88 (t, *J* = 6.3 Hz, 3H). <sup>13</sup>C NMR (150 MHz, CDCl<sub>3</sub>) δ 129.88, 125.54, 125.50, 125.46, 125.42, 72.64, 43.90, 37.19, 32.01, 29.74, 29.71, 29.40, 25.84, 22.81, 14.24. IR (neat) ν<sub>max</sub> 3382.00 (br, w), 2923.76 (s), 2853.47 (s), 1612.24 (m), 1511.44 (s), 1464.39 (m), 1441.35 (m), 1299.98 (m), 1245.73 (s), 1177.39 (m), 1038.10 (s), 817.67 (m), 570.95 (w), 521.58 (w) cm<sup>-1</sup>. HRMS (DART) for C<sub>17</sub>H<sub>24</sub>F<sub>3</sub> [M+H-H<sub>2</sub>O]<sup>+</sup>: Calc'd: 285.183, found: 285.1837. [α]<sub>D</sub><sup>20</sup> = -6.195 (*c* = 1.9, CHCl<sub>3</sub>, *l* = 50 mm).

#### Analysis of Stereochemistry:

Racemic compound was prepared according to the general **procedure B** with 2,2'-bipy (6 mol%) as the ligand. Absolute stereochemistry was assigned by analogy (see product **34, 19**).

Chiral SFC (Chiracel OJ-H, 0% IPA, 3 mL/min, 100 bar, 35 °C, 210-289 nm) – analysis of (R)-1-(4-(trifluoromethyl)phenyl)decan-2-ol.

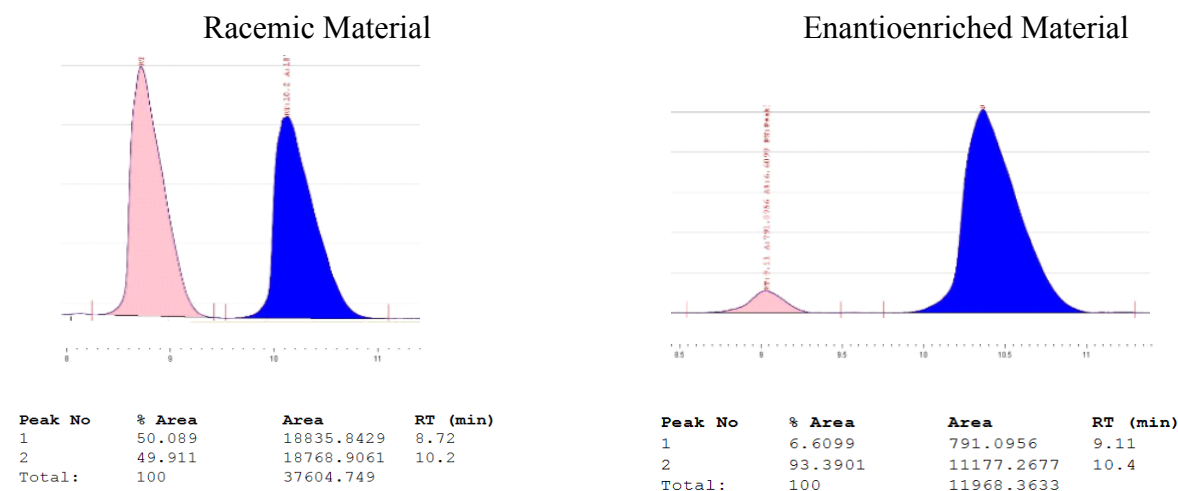

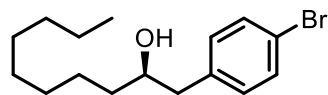

**(R)-1-(4-bromophenyl)decan-2-ol (4).** The reaction was performed according to the general **procedure A**, with slight deviation. The reaction was run at room temperature for 12 hours. heating the reaction resulted in over-coupling. Reagents: 9-BBN in THF (0.48 mL, 0.5 M, 0.24 mmol, 1.20 equiv.), 1-octene (26.9 mg, 0.24 mmol, 1.20 equiv.), halide-free vinylolithium in THF (0.15 mL, 1.47 M, 0.22 mmol, 1.10 equiv.), a solution of Ni(acac)<sub>2</sub> (2.57 mg, 0.010 mmol, 0.050 equiv.) and **(R,R)-L6** (2.88 mg, 0.012 mmol, 0.060 equiv.) in THF (0.4 mL), 1,4-bromiodobenzene (56.6 mg, 0.20 mmol, 1.00 equiv.). The crude mixture was purified by silica gel chromatography (50% DCM in hexanes, stained with CAM) to afford a white solid (50.1 mg, 80% yield).

<sup>1</sup>H NMR (500 MHz, CDCl<sub>3</sub>) δ 7.43 (d, *J* = 7.7 Hz 2H), 7.10 (d, *J* = 7.7 Hz, 2H), 3.81-3.76 (m, 1H), 2.77 (dd, *J* = 13.7, 4.3 Hz, 1H), 2.61 (dd, *J* = 13.7, 8.2 Hz, 1H), 1.52-1.22 (m, 14H), 0.88 (t, *J* = 6.7 Hz, 3H). <sup>13</sup>C NMR (150 MHz, CDCl<sub>3</sub>) δ 137.86, 131.68, 131.30, 120.42, 72.66, 43.51, 37.05, 32.01, 29.76, 29.71, 29.40, 25.86, 22.81, 14.25. IR (neat) ν<sub>max</sub> 3354.91 (br, w), 3291.22 (br, w), 2918.89 (s), 2850.85 (s), 1486.49 (m), 1465.52 (m), 1085.32 (w), 1070.61 (m), 1012.27 (m), 799.33 (m) cm<sup>-1</sup>. HRMS (DART) for C<sub>16</sub>H<sub>26</sub>BrO [M+H]<sup>+</sup>: Calc'd: 330.1433, found: 330.142. [α]<sub>D</sub><sup>20</sup> = -6.073 (*c* = 1.63, CHCl<sub>3</sub>, *l* = 50 mm).

### Analysis of Stereochemistry:

Racemic compound was prepared according to the general **procedure A** with 2,2'-bipy (6 mol%) as the ligand. Absolute stereochemistry was assigned by analogy (see product **34**, **19**).

Chiral SFC (Chiracel OJ-H, 5% IPA, 3 mL/min, 100 bar, 35 °C, 210-289 nm) – analysis of (R)-1-(4-bromophenyl)decan-2-ol.

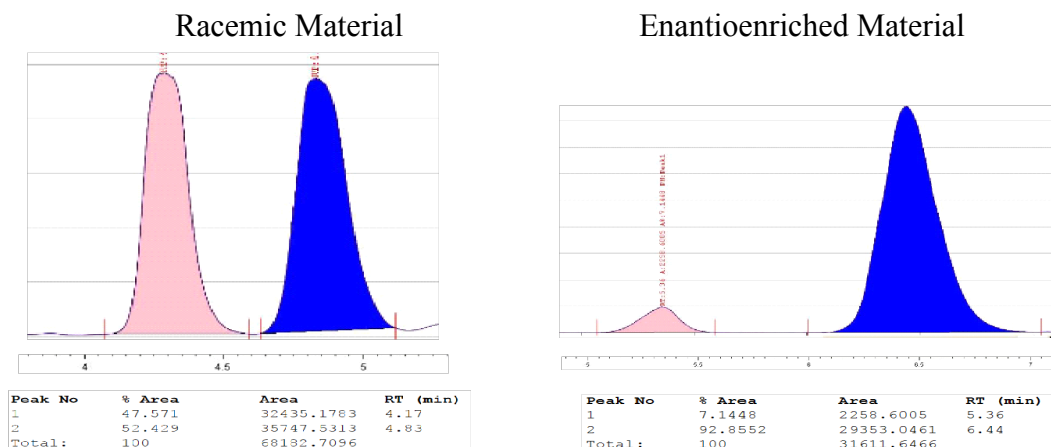

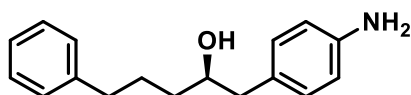**(R)-1-(4-aminophenyl)-5-phenylpentan-2-ol (5).**

The reaction was performed according to the general **procedure A** with 9-BBN in THF (0.48 mL, 0.5 M, 0.24 mmol, 1.20 equiv.), allylbenzene (28.4 mg, 0.24 mmol, 1.20 equiv.), halide-free vinylolithium in THF (0.15 mL, 1.47 M, 0.22 mmol, 1.10 equiv.), a solution of Ni(acac)<sub>2</sub> (2.57 mg, 0.010 mmol, 0.050 equiv.) and **(R,R)-L6** (2.88 mg, 0.012 mmol, 0.060 equiv.) in THF (0.4 mL), 4-iodoaniline (43.8 mg, 0.20 mmol, 1.00 equiv.) The crude mixture was purified by silica gel chromatography (60% EtAOc in hexanes, stained with CAM) to afford a yellow solid (27.6 mg, 54% yield).

<sup>1</sup>H NMR (500 MHz, CDCl<sub>3</sub>) δ 7.31-7.15 (m, 5H), 6.98 (d, *J* = 8.2 Hz, 2H), 6.64 (d, *J* = 8.2 Hz, 2H), 3.91-3.29 (m, 3H), 2.72 (dd, *J* = 13.7, 4.1 Hz, 1H), 2.68-2.60 (m, 2H), 2.51 (dd, *J* = 13.7, 8.5 Hz, 1H), 1.90-1.76 (m, 1H), 1.75-1.64 (m, 1H), 1.61-1.48 (m, 2H). <sup>13</sup>C NMR (150 MHz, CDCl<sub>3</sub>) δ 145.04, 142.60, 130.38, 128.56, 128.42, 127.43, 125.84, 115.53, 72.74, 43.31, 36.39, 36.05, 27.79. IR (neat) ν<sub>max</sub> 3343.63 (br, m), 3034.98 (w), 2930.39 (m), 2856.48 (w), 1621.91 (m), 1515.60 (s), 1501.35 (m), 1452.64 (w), 1272.58 (w), 1178.86 (w), 1087.70 (w), 820.26 (m), 749.76 (m), 699.81 (m), 562.06 (w), 509.25 (w) cm<sup>-1</sup>. HRMS (DART) for C<sub>17</sub>H<sub>22</sub>NO [M+H]<sup>+</sup>: Calc'd: 256.1701, found: 256.1702. [α]<sub>D</sub><sup>20</sup> = -1.74 (*c* = 1.40, CHCl<sub>3</sub>, *l* = 50 mm).

**Analysis of Stereochemistry:**

Racemic compound was prepared according to the general **procedure A** with 2,2'-bipy (6 mol%) as the ligand. Absolute stereochemistry was assigned by analogy (see product **34**, **19**).

Chiral SFC (Chiracel OJ-H, 20% IPA, 3 mL/min, 100 bar, 35 °C, 210-289 nm) – analysis of *(R)*-1-(4-aminophenyl)-5-phenylpentan-2-ol.

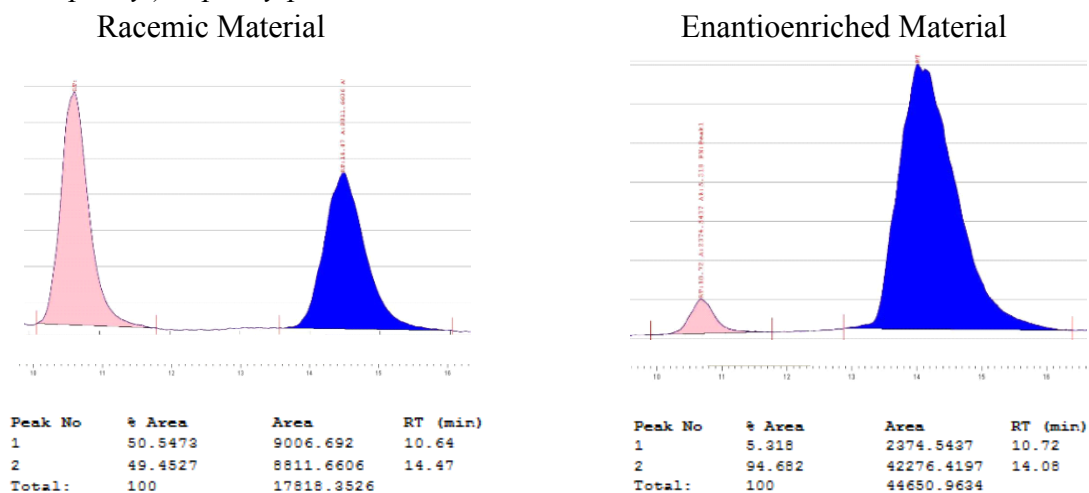



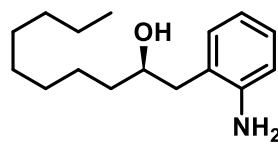

**(R)-1-(2-aminophenyl)decan-2-ol (6).** The reaction was performed according to the general **procedure A** with 9-BBN in THF (0.48 mL, 0.5 M, 0.24 mmol, 1.20 equiv.), 1-octene (32.7 mg, 0.24 mmol, 1.20 equiv.), halide-free vinyl lithium in THF (0.15 mL, 1.47 M, 0.22 mmol, 1.10 equiv.), 1-octene (26.9 mg, 0.24 mmol, 1.20 equiv.), a solution of Ni(acac)<sub>2</sub> (2.57 mg, 0.010 mmol, 0.050 equiv.) and **(R,R)-L6** (2.88 mg, 0.012 mmol, 0.060 equiv.) in THF (0.4 mL), 2-iodoaniline (43.8 mg, 0.20 mmol, 1.00 equiv.) The crude mixture was purified by silica gel chromatography (35% EtOAc in hexanes, stained with CAM) to afford a dark oil (30.9 mg, 62% yield).

**<sup>1</sup>H NMR** (500 MHz, CDCl<sub>3</sub>) δ 7.10-7.01 (m, 2H), 6.81-6.72 (m, 2H), 3.94-3.84 (m, 1H), 3.80-3.44 (br s, 1H), 2.74 (dd, *J* = 14.3, 3.7 Hz, 1H), 2.66 (dd, *J* = 14.3, 8.1 Hz, 1H), 1.58-1.19 (m, 14H), 0.88 (t, *J* = 6.20 Hz, 1H). **<sup>13</sup>C NMR** (150 MHz, CDCl<sub>3</sub>) δ 144.73, 131.40, 127.75, 124.92, 119.67, 116.91, 73.22, 39.65, 37.49, 32.01, 29.78, 29.73, 29.41, 25.97, 22.81, 14.24. **IR** (neat) 3347.00 (br, w), 2922.38 (s), 2852.76 (s), 1621.62 (m), 1583.64 (w), 1495.75 (m), 1465.75 (w), 1311.84 (w), 1264.58 (w), 1076.47 (w), 747.99 (s), 722.18 (w), 649.21 (w), 616.58 (w), 533.16 (w), 491.23 (w) cm<sup>-1</sup>. **HRMS** (DART) for C<sub>16</sub>H<sub>28</sub>NO [M+H]<sup>+</sup>: Calc'd: 250.2171, found: 250.2181. **[α]<sub>D</sub><sup>20</sup>** = +8.08 (*c* = 4.12, CHCl<sub>3</sub>, *l* = 50 mm).

### Analysis of Stereochemistry:

Racemic compound was prepared according to the general **procedure A** with 2,2'-bipy (6 mol%) as the ligand. Absolute stereochemistry was assigned by analogy (see product **34**, **19**).

*Chiral SFC (Chiracel OJ-H, 10% IPA, 3 mL/min, 100 bar, 35 °C, 210-289 nm) – analysis of (R)-1-(2-aminophenyl)decan-2-ol.*

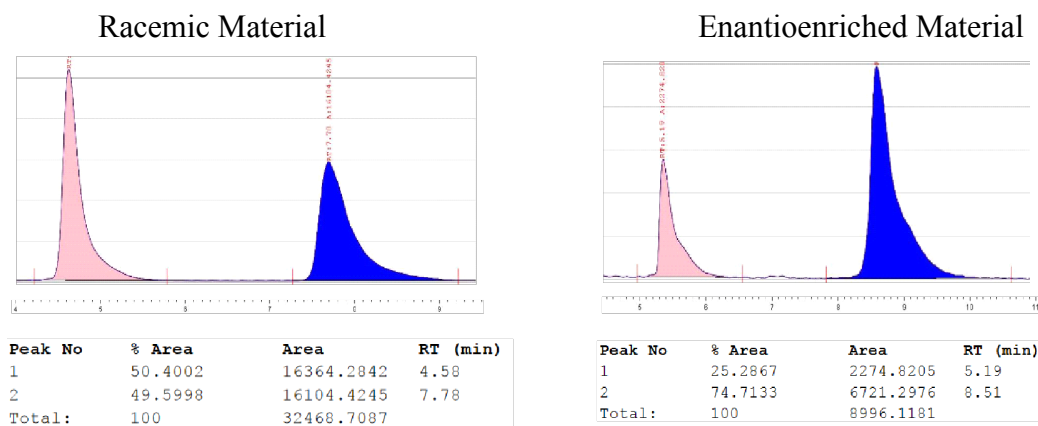

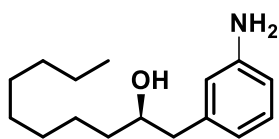

**(R)-1-(3-aminophenyl)decan-2-ol (7).** The reaction was performed according to the general **procedure A** with 9-BBN in THF (0.48 mL, 0.5 M, 0.24 mmol, 1.20 equiv.), (32.7 mg, 0.24 mmol, 1.20 equiv.), halide-free vinyl lithium in THF (0.15 mL, 1.47 M, 0.22 mmol, 1.10 equiv.), 1-octene (26.9 mg, 0.24 mmol, 1.20 equiv.), a solution of Ni(acac)<sub>2</sub> (2.57 mg, 0.010 mmol, 0.050 equiv.) and **(R,R)-L6** (2.88 mg, 0.012 mmol, 0.060 equiv.) in THF (0.4 mL), 3-iodoaniline (43.8 mg, 0.20 mmol, 1.00 equiv.) The crude mixture was purified by silica gel chromatography (30% EtOAc in hexanes, stained with CAM) to afford a yellow solid (39.9 mg, 80% yield).

<sup>1</sup>H NMR (500 MHz, CDCl<sub>3</sub>) δ 7.10 (t, *J* = 7.6 Hz, 1H), 6.64-6.51 (m, 3H), 3.89-3.36 (m, 3H), 2.75 (dd, *J* = 13.5, 4.0 Hz, 1H), 2.53 (dd, *J* = 13.5, 8.6 Hz, 1H), 1.58-1.18 (m, 14H), 0.89 (t, *J* = 6.8 Hz, 3H). <sup>13</sup>C NMR (150 MHz, CDCl<sub>3</sub>) δ 146.74, 140.00, 129.66, 119.76, 116.23, 113.44, 72.70, 44.25, 37.00, 32.02, 29.82, 29.73, 29.41, 25.92, 22.81, 14.24. IR (neat)  $\nu_{\max}$  3382.23 (br, w), 3316.11 (m), 2953.10 (m), 2922.65 (s), 2853.03 (s), 1601.73 (m), 1463.40 (m), 789.09 (m), 697.50 (m) cm<sup>-1</sup>. HRMS (DART) for C<sub>16</sub>H<sub>28</sub>NO [M+H]<sup>+</sup>: Calc'd: 250.2171, found: 250.2169. [ $\alpha$ ]<sub>D</sub><sup>20</sup> = -11.157 (*c* = 0.72, CHCl<sub>3</sub>, *l* = 50 mm).

#### Analysis of Stereochemistry:

Racemic compound was prepared according to the general **procedure A** with 2,2'-bipy (6 mol%) as the ligand. Absolute stereochemistry was assigned by analogy (see product **34, 19**).

Chiral SFC (Chiracel OJ-H, 8% IPA, 3 mL/min, 100 bar, 35 °C, 210-289 nm) – analysis of (*R*)-1-(3-aminophenyl)decan-2-ol.

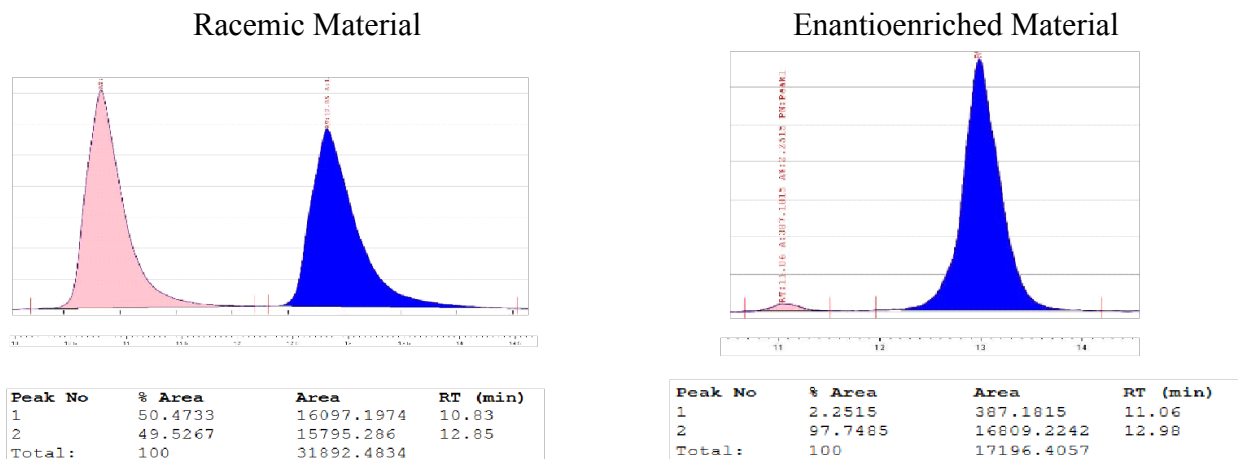

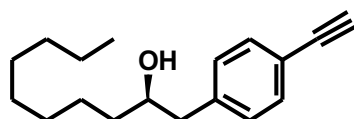

**(R)-1-(4-ethynylphenyl)decan-2-ol (8)**. The reaction was performed according to the general **procedure A** with 9-BBN in THF (0.48 mL, 0.5 M, 0.24 mmol, 1.20 equiv.), 1-octene (26.9 mg, 0.24 mmol, 1.20 equiv.), halide-free vinyl lithium in THF (0.15 mL, 1.47 M, 0.22 mmol, 1.10 equiv.), a solution of Ni(acac)<sub>2</sub> (2.57 mg, 0.010 mmol, 0.050 equiv.) and **(R,R)-L6** (2.88 mg, 0.012 mmol, 0.060 equiv.) in THF (0.4 mL), (4-iodophenylethynyl)trimethylsilane (60.04 mg, 0.20 mmol, 1.00 equiv.). After oxidation and work-up methanol (1.5 mL) and K<sub>2</sub>CO<sub>3</sub> (110.56 mg, 0.80 mmol, 4.00 equiv.) were added to the crude mixture. The reaction mixture was allowed to stir at room temperature for 3 hours. Methanol was then evaporated off under reduced pressure. The resulting residue was diluted with CH<sub>2</sub>Cl<sub>2</sub> (4 mL), washed with aq. Saturated NaHCO<sub>3</sub> (2mL x 3), dried with Na<sub>2</sub>SO<sub>4</sub>, filtered, and concentrated under reduced pressure. The crude mixture was purified by silica gel chromatography (50% DCM in hexanes, stained with CAM) to afford a white solid (28.5 mg, 55% yield).

<sup>1</sup>H NMR (400 MHz, CDCl<sub>3</sub>) δ 7.44 (d, *J* = 7.9 Hz, 2H), 7.18 (d, *J* = 7.9 Hz, 2H), 3.89-3.75 (m, 1H), 3.05 (s, 1H), 2.82 (dd, *J* = 13.6, 4.3 Hz, 1H), 2.66 (dd, *J* = 13.6, 8.2 Hz, 1H), 1.59-1.18 (m, 14H), 0.88 (t, *J* = 6.7 Hz, 3H). <sup>13</sup>C NMR (126 MHz, CDCl<sub>3</sub>) δ 139.88, 132.40, 129.58, 120.29, 83.72, 77.08, 72.69, 44.06, 37.06, 32.01, 29.75, 29.70, 29.40, 25.85, 22.81, 14.25. IR (neat) ν<sub>max</sub> 3356.92 (w), 3278.76 (m), 2955.76 (w), 2920.35 (s), 2852.12 (s), 1506.45 (w), 1467.54 (m), 1431.34 (w), 1410.04 (w), 1128.54 (w), 1106.54 (w), 1084.63(m), 1058.94 (w), 1022.94 (m), 907.26 (w), 837.69 (m), 818.04 (s), 722.54 (m), 642.49 (s), 614.39 (s), 578.83 (s), 527.84 (m), 517.54 (m) cm<sup>-1</sup>. HRMS (DART) for C<sub>17</sub>H<sub>27</sub>O [M+H-H<sub>2</sub>O]<sup>+</sup>: Calc'd: 247.2062, found: 247.2072. [α]<sub>D</sub><sup>20</sup> = -8.4280 (*c* = 0.775, CHCl<sub>3</sub>, *l* = 50 mm).

**Analysis of Stereochemistry:**

Racemic compound was prepared according to the general **procedure A** with 2,2'-bipy (6 mol%) as the ligand. Absolute stereochemistry was assigned by analogy (see product **34, 19**).

Chiral SFC (Chiracel ODR-H, 2% IPA, 3 mL/min, 100 bar, 35 °C, 210-289 nm) – analysis of (*R*)-1-(4-ethynylphenyl)decan-2-ol.

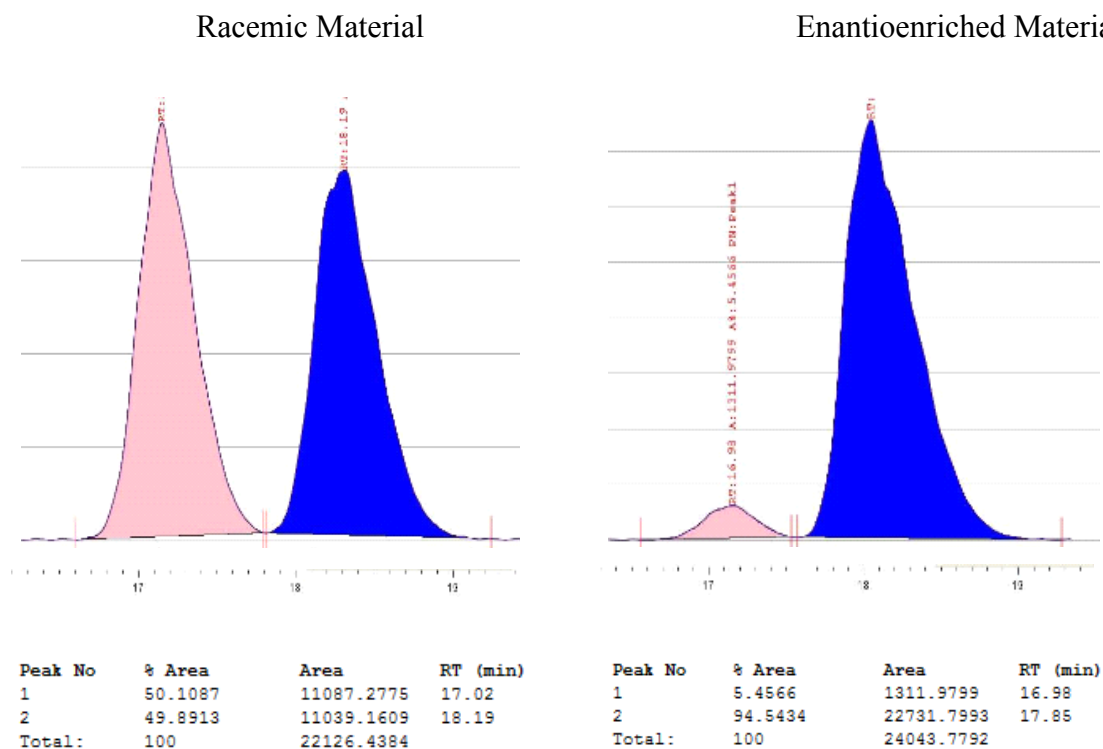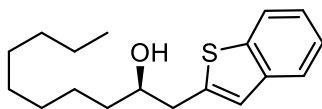

**(*R*)-1-(benzo[*b*]thiophen-2-yl)decan-2-ol (9).**

The reaction was performed according to the general **procedure A** with 9-BBN in THF (0.48 mL, 0.5 M, 0.24 mmol, 1.20 equiv.), (32.7 mg, 0.24 mmol, 1.20 equiv.), halide-free vinyl lithium in THF (0.15 mL, 1.47 M, 0.22 mmol, 1.10 equiv.), 1-octene (26.9 mg, 0.24 mmol, 1.20 equiv.), a solution of Ni(acac)<sub>2</sub> (2.57 mg, 0.010 mmol, 0.050 equiv.) and (***R,R***)-**L6** (2.88 mg, 0.012 mmol, 0.060 equiv.) in THF (0.4 mL), 2-iodobenzothiophene (52.02 mg, 0.20 mmol, 1.00 equiv.). The crude mixture was purified by silica gel chromatography (5% EtOAc in hexanes, stained with CAM) to afford a yellow oil (29.3 mg, 50% yield). <sup>1</sup>H NMR (500 MHz, CDCl<sub>3</sub>)

7.78 (d,  $J = 7.9$  Hz, 1H), 7.70 (d,  $J = 7.8$  Hz, 1H), 7.35 – 7.26 (m, 2H), 7.10 (s, 1H), 3.92 (tq,  $J = 8.5, 4.4$  Hz, 1H), 3.10 (dd,  $J = 14.7, 4.0$  Hz, 1H), 2.97 (dd,  $J = 14.7, 8.1$  Hz, 1H), 1.75 (d,  $J = 4.1$  Hz, 1H), 1.60 – 1.47 (m, 3H), 1.44 – 1.19 (m, 12H), 0.89 (t,  $J = 6.8$  Hz, 3H).  $^{13}\text{C}$  NMR (126 MHz,  $\text{CDCl}_3$ )  $\delta$  142.02, 140.17, 139.91, 124.36, 123.88, 123.03, 122.74, 122.27, 72.27, 39.07, 36.85, 32.01, 29.74, 29.70, 29.40, 25.86, 22.81, 14.25. IR (neat)  $\nu_{\text{max}}$  3371.6 (br), 3058.9 (s, w), 2923.4 (s), 2853.2 (s), 1457.8 (s), 1453.8 (s), 1435.8 (s, w), 1307.1 (s, w), 1253.8 (s, w), 1154.3 (s, w), 1125.3 (s), 1102.9 (s), 1066.2 (s), 854.0 (s), 743.9 (s), 725.9 (s). HRMS (DART) for  $\text{C}_{18}\text{H}_{25}\text{S}$   $[\text{M}+\text{H}-\text{H}_2\text{O}]^+$ : Calc'd: 273.1677, found: 273.1668.  $[\alpha]_{\text{D}}^{20} = -7.97$  ( $c = 1.00$ ,  $\text{CHCl}_3$ ,  $l = 50$  mm).

### Analysis of Stereochemistry:

Racemic compound was prepared according to the general **procedure A** with 2,2'-bipy (6 mol%) as the ligand. Absolute stereochemistry was assigned by analogy (see product **34**, **19**).

Chiral SFC (Chiracel OJ-H, 10% IPA, 3 mL/min, 100 bar, 35 °C, 210-289 nm) – analysis of (R)-1-(benzo[b]thiophen-2-yl)decan-2-ol.

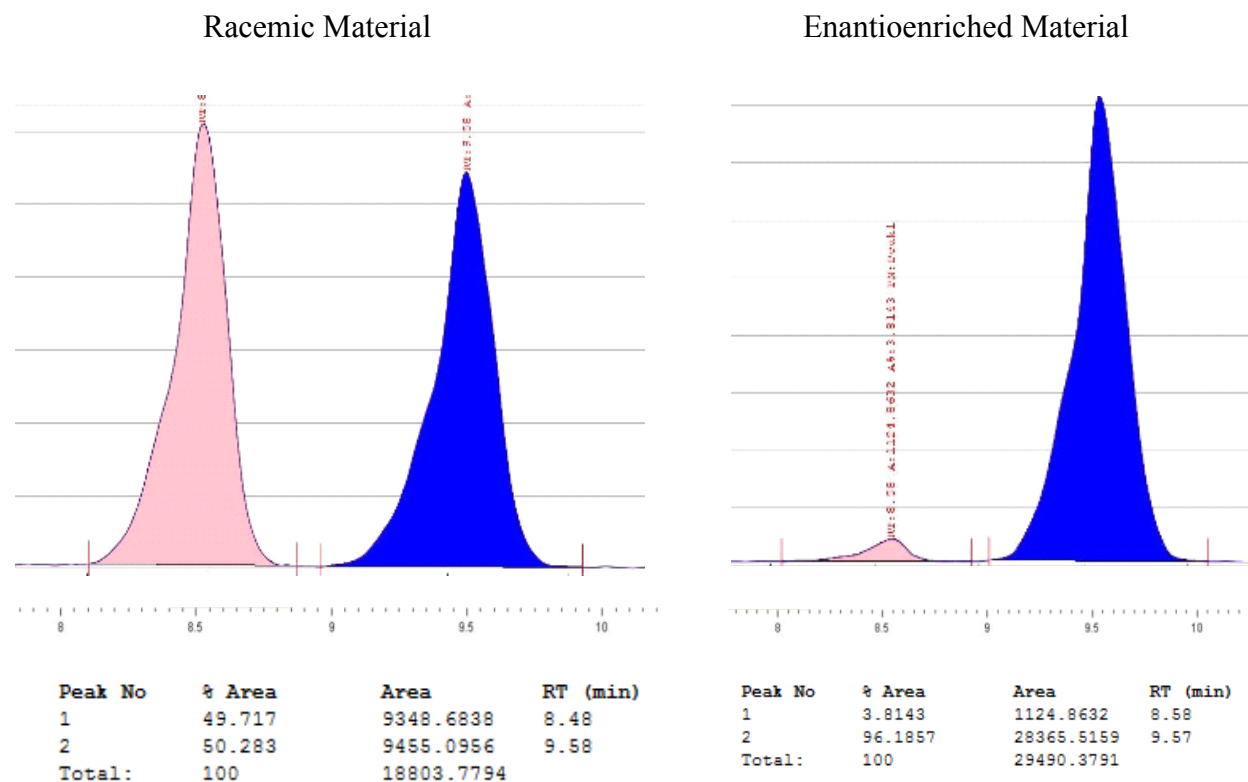

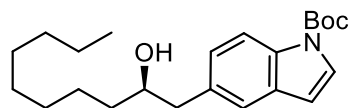

**tert-butyl (R)-5-(2-hydroxydecyl)-1H-indole-1-carboxylate (10).**

The reaction was performed according to the general **procedure A**, with slight deviation. The reaction was run at room temperature for 12 hours. Reaction was prepared with 9-BBN in THF (0.48 mL, 0.5 M, 0.24 mmol, 1.20 equiv.), 1-octene (26.9 mg, 0.24 mmol, 1.20 equiv.), halide-free vinyl lithium in THF (0.15 mL, 1.47 M, 0.22 mmol, 1.10 equiv.), a solution of Ni(acac)<sub>2</sub> (2.57 mg, 0.010 mmol, 0.050 equiv.) and (**R,R**)-**L6** (2.88 mg, 0.012 mmol, 0.060 equiv.) in THF (0.4 mL tert-butyl 5-iodoindole-1-carboxylate (68.63 mg, 0.20 mmol, 1.00 equiv.). The crude mixture was purified by silica gel chromatography (5% EtOAc in hexanes, stained with CAM) to afford a colorless oil (41 mg, 55% yield). <sup>1</sup>H NMR (500 MHz, CDCl<sub>3</sub>) δ 8.07 (d, *J* = 8.4 Hz, 1H), 7.58 (d, *J* = 3.7 Hz, 1H), 7.40 (d, *J* = 1.6 Hz, 1H), 7.17 (dd, *J* = 8.5, 1.7 Hz, 1H), 6.53 (dd, *J* = 3.7, 0.9 Hz, 1H), 3.88 – 3.79 (m, 1H), 2.93 (dd, *J* = 13.6, 4.2 Hz, 1H), 2.72 (dd, *J* = 13.6, 8.4 Hz, 1H), 1.67 (s, 9H), 1.57 – 1.46 (m, 4H), 1.42 – 1.19 (m, 11H), 0.88 (t, *J* = 6.8 Hz, 3H). <sup>13</sup>C NMR (150 MHz, CDCl<sub>3</sub>) δ 149.89, 134.17, 132.95, 131.07, 126.33, 125.83, 121.62, 115.29, 107.22, 83.76, 73.09, 44.07, 36.93, 32.02, 29.83, 29.74, 29.42, 28.35, 25.95, 22.81, 14.25. IR (neat) ν<sub>max</sub> 3429.9 (br), 2924.5 (s), 2854.1 (s), 1733.1(s), 1580.6 (s, w), 1537.9 (s, w), 1469.1 (s), 1443.1 (s), 1292.9 (s), 1163.5 (s), 1130.7 (s), 1039.8 (s), 1023.2 (s), 886.2 (s), 855.4 (s), 804.7 (s, w), 804.7 (s, w), 765.4 (s), 723.9 (s). HRMS (DART) for C<sub>23</sub>H<sub>36</sub>NO<sub>3</sub> [M+H]<sup>+</sup>: Calc'd: 374.2913, found: 374.2695. [α]<sub>D</sub><sup>20</sup> = -1.43 (*c* = 1.00, CHCl<sub>3</sub>, *l* = 50 mm).

**Analysis of Stereochemistry:**

Racemic compound was prepared according to the general **procedure A** with 2,2'-bipy (6 mol%) as the ligand. Absolute stereochemistry was assigned by analogy (see product **34**, **19**).

Chiral SFC (Chiracel OJ-H, 6% IPA, 3 mL/min, 100 bar, 35 °C, 210-289 nm) – analysis of tert-butyl (*R*)-5-(2-hydroxydecyl)-1*H*-indole-1-carboxylate.

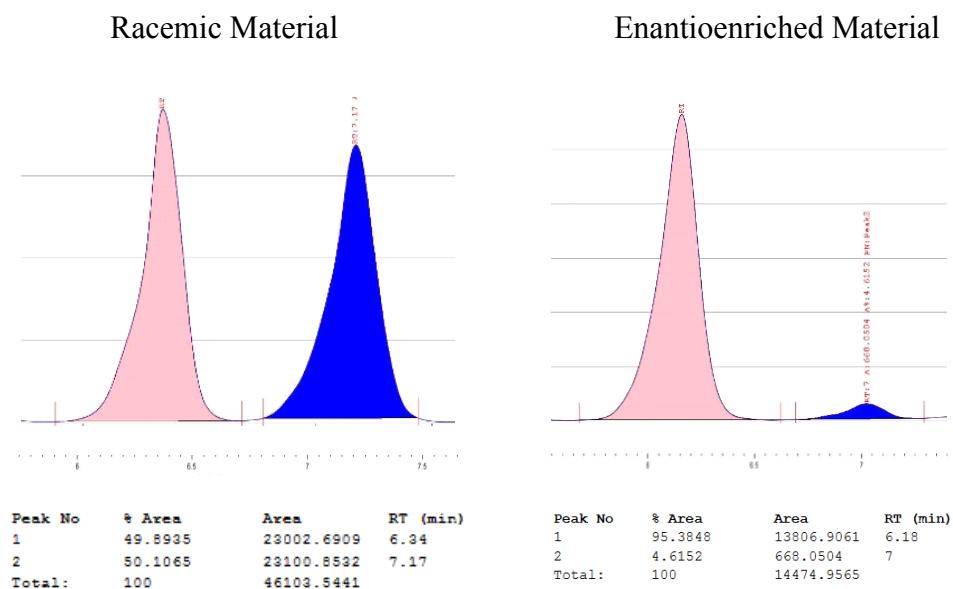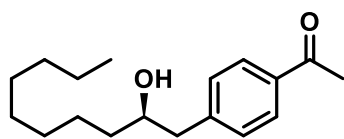

**(*R*)-1-(4-(2-hydroxydecyl)phenyl)ethan-1-one (11).** The reaction was performed according to the general **procedure A** with 9-BBN in THF (0.48 mL, 0.5 M, 0.24 mmol, 1.20 equiv.), (32.7 mg, 0.24 mmol, 1.20 equiv.), halide-free vinylolithium in THF (0.15 mL, 1.47 M, 0.22 mmol, 1.10 equiv.), 1-octene (26.9 mg, 0.24 mmol, 1.20 equiv.), a solution of Ni(acac)<sub>2</sub> (2.57 mg, 0.010 mmol, 0.050 equiv.) and (***R,R***)-**L6** (2.88 mg, 0.012 mmol, 0.060 equiv.) in THF (0.4 mL), 4'-iodoacetophenone (55.3 mg, 0.20 mmol, 1.00 equiv.) The crude mixture was purified by silica gel chromatography (20% EtOAc in hexanes, stained with CAM) to afford a yellow solid (43.1 mg, 78% yield).

**<sup>1</sup>H NMR** (500 MHz, CDCl<sub>3</sub>) δ 7.91 (d, *J* = 8.0 Hz, 2H), 7.32 (d, *J* = 8.0 Hz, 2H), 3.89-3.82 (m, 1H), 2.88 (dd, *J* = 13.6, 4.3 Hz, 1H), 2.73 (dd, *J* = 13.6, 8.3 Hz, 1H), 2.59 (s, 3H), 1.58-1.20 (m, 14H), 0.88 (t, *J* = 6.9 Hz, 3H). **<sup>13</sup>C NMR** (150 MHz, CDCl<sub>3</sub>) δ 197.95, 144.77, 135.68, 129.79, 128.73, 72.64, 44.12, 37.21, 32.00, 29.74, 29.69, 29.39, 26.72, 25.84, 22.81, 14.25. **IR** (neat)  $\nu_{\max}$  3425.67 (br, w), 2922.79 (s), 2853.10 (m), 1678.84 (s), 1605.64 (m), 1569.98 (w), 1464.42 (w), 1413.10 (w), 1357.42 (w), 1304.74 (w), 1266.38 (s), 1182.21 (w), 1117.60 (w), 1075.11 (w), 956.57 (w), 837.28 (w), 813.44 (w), 599.71 (m), 585.76 (w) cm<sup>-1</sup>. **HRMS** (DART) for C<sub>18</sub>H<sub>29</sub>O<sub>2</sub> [M+H]<sup>+</sup>: Calc'd: 277.2168, found: 277.2156. **[ $\alpha$ ]<sub>D</sub><sup>20</sup>** = -8.148 (*c* = 3.46, CHCl<sub>3</sub>, *l* = 50 mm).

### Analysis of Stereochemistry:

Racemic compound was prepared according to the general **procedure A** with 2,2'-bipy (6 mol%) as the ligand. Absolute stereochemistry was assigned by analogy (see product **34**, **19**).

Chiral SFC (Chiracel AD-H, 10% IPA, 3 mL/min, 100 bar, 35 °C, 210-289 nm) – analysis of (*R*)-1-(4-(2-hydroxydecyl)phenyl)ethan-1-one.

Racemic Material

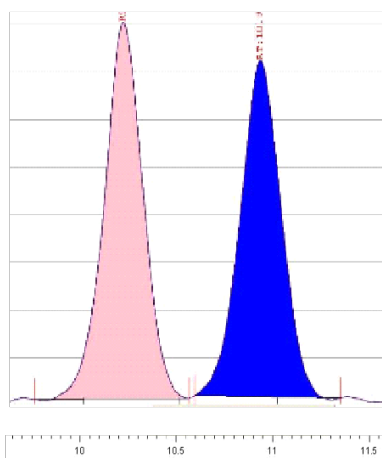

| Peak No | % Area  | Area      | RT (min) |
|---------|---------|-----------|----------|
| 1       | 51.5576 | 2225.3493 | 10.2     |
| 2       | 48.4424 | 2090.8911 | 10.91    |
| Total:  | 100     | 4316.2404 |          |

Enantioenriched Material

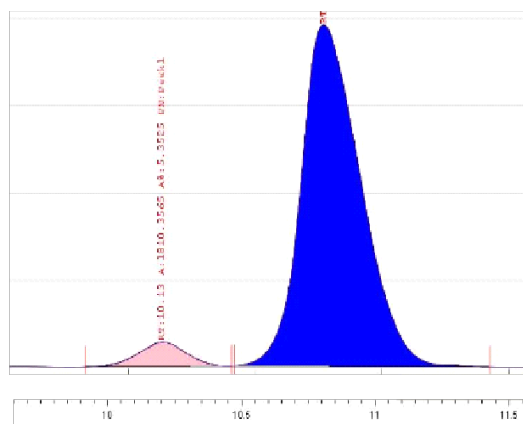

| Peak No | % Area  | Area       | RT (min) |
|---------|---------|------------|----------|
| 1       | 5.3525  | 1810.3565  | 10.13    |
| 2       | 94.6475 | 32012.4898 | 10.77    |
| Total:  | 100     | 33822.8463 |          |



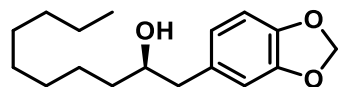

**(R)-1-(benzo[d][1,3]dioxol-5-yl)decan-2-ol (12).** The reaction was performed according to the general **procedure A** with 9-BBN in THF (0.48 mL, 0.5 M, 0.24 mmol, 1.20 equiv.), 1-octene (26.9 mg, 0.24 mmol, 1.20 equiv.), halide-free vinylolithium in THF (0.15 mL, 1.47 M, 0.22 mmol, 1.10 equiv.), a solution of Ni(acac)<sub>2</sub> (2.57 mg, 0.010 mmol, 0.050 equiv.) and **(R,R)-L6** (2.88 mg, 0.012 mmol, 0.060 equiv.) in THF (0.4 mL), 5-iodo-1,3-benzodioxole (49.6 mg, 0.20 mmol, 1.00 equiv.) The crude mixture was purified by silica gel chromatography (50% DCM in hexanes, stained with CAM) to afford a white solid (36.1 mg, 65% yield).

**<sup>1</sup>H NMR** (500 MHz, CDCl<sub>3</sub>) δ 6.76 (d, *J* = 7.8 Hz, 1H), 6.71 (d, *J* = 1.7 Hz, 1H), 6.66 (dd, *J* = 7.8, 1.7 Hz, 1H), 5.94 (s, 2H), 3.84-3.71 (m, 1H), 2.75 (dd, *J* = 13.7, 4.1 Hz, 1H), 2.55 (dd, *J* = 13.7, 8.5 Hz, 1H), 1.55-1.15 (m, 14H), 0.88 (t, *J* = 6.7 Hz, 3H). **<sup>13</sup>C NMR** (150 MHz, CDCl<sub>3</sub>) δ 147.92, 146.32, 132.51, 122.41, 109.85, 108.44, 101.01, 72.87, 43.88, 36.93, 32.02, 29.81, 29.73, 29.41, 25.91, 22.81, 14.24. **IR** (neat)  $\nu_{\max}$  3406.47 (br, w), 2924.26 (s), 2854.22 (m), 1503.03 (m), 1489.12 (s), 1466.03 (w), 1332.03 (m), 1245.98 (s), 1189.19 (w), 1040.89 (s), 940.18 (m), 928.68 (m), 807.76 (m) cm<sup>-1</sup>. **HRMS** (DART) for C<sub>17</sub>H<sub>25</sub>O<sub>2</sub> [M+H-H<sub>2</sub>O]<sup>+</sup>: Calc'd: 261.1855, found: 261.1849. [ $\alpha$ ]<sub>D</sub><sup>20</sup> = -9.291 (*c* = 1.58, CHCl<sub>3</sub>, *l* = 50 mm).

### Analysis of Stereochemistry:

Racemic compound was prepared according to the general **procedure A** with 2,2'-bipy (6 mol%) as the ligand. Absolute stereochemistry was assigned by analogy (see product **34**, **19**).

Chiral SFC (Chiracel OD-H, 5% IPA, 3 mL/min, 100 bar, 35 °C, 210-289 nm) – analysis of (R)-1-(benzo[d][1,3]dioxol-5-yl)decan-2-ol.

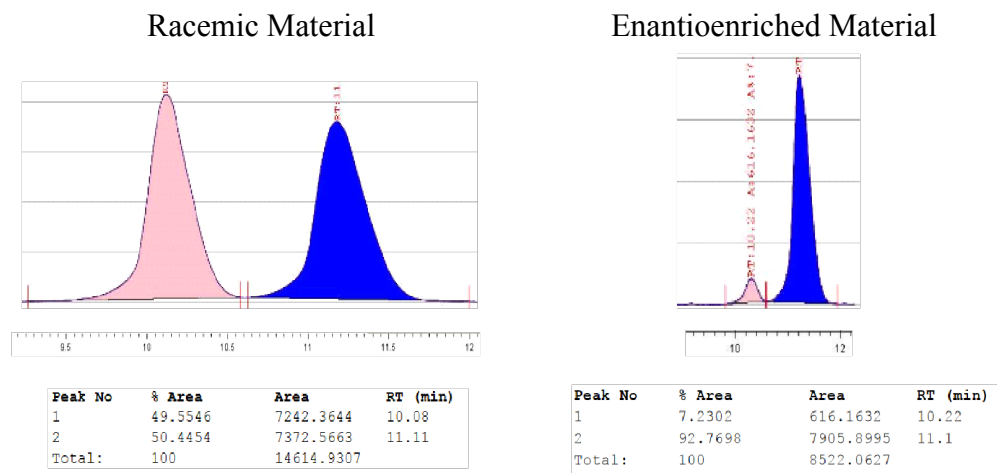

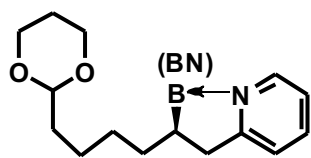

(*R*)-2-(2-(9-borabicyclo[3.3.1]nonan-9-yl)-6-(1,3-dioxan-2-yl)hexyl)pyridine (**13**). The reaction was performed according to the general **procedure A** with 9-BBN in THF (0.48 mL, 0.5 M, 0.24 mmol, 1.20 equiv.), 2-(but-3-en-1-yl)-1,3-dioxane (**S-14**) (34.1 mg, 0.24 mmol, 1.20 equiv.), halide-free vinylolithium in THF (0.15 mL, 1.47 M, 0.22 mmol, 1.10 equiv.), a solution of Ni(acac)<sub>2</sub> (2.57 mg, 0.010 mmol, 0.050 equiv.) and (*R,R*)-**L6** (2.88 mg, 0.012 mmol, 0.060 equiv.) in THF (0.4 mL), 2-iodopyridine (41.0 mg, 0.20 mmol, 1.00 equiv.) The crude mixture was purified by silica gel chromatography (15% EtOAc in pentane, stained with CAM) to afford a colorless oil (54.9 mg, 73% yield).

<sup>1</sup>H NMR (600 MHz, CDCl<sub>3</sub>) δ 8.77 (d, *J* = 5.7 Hz, 1H), 7.74 (td, *J* = 7.7, 1.4 Hz, 1H), 7.36 (d, *J* = 7.8 Hz, 1H), 7.26 (m, 1H), 4.47 (t, *J* = 5.2 Hz, 1H), 4.08 (ddd, *J* = 11.2, 5.1, 1.7 Hz, 2H), 3.74 (tdd, *J* = 12.1, 2.6, 1.3 Hz, 2H), 3.14 (dd, *J* = 16.8, 6.2 Hz, 1H), 2.77 (d, *J* = 16.8 Hz, 1H), 2.32 – 2.14 (m, 1H), 2.10 – 1.13 (m, 21H), 1.07 – 0.92 (m, 1H), 0.63 – 0.41 (m, 2H). <sup>13</sup>C NMR (151 MHz, CDCl<sub>3</sub>) δ 164.37, 144.94, 138.42, 123.45, 121.47, 102.76, 67.03, 36.97, 35.71, 34.89, 33.43, 30.83, 30.21 (br) 30.02, 29.34, 28.96, 26.04, 25.10, 24.66, 24.34, 23.93 (br), 22.15 (br) <sup>11</sup>B NMR (160 MHz, CDCl<sub>3</sub>) δ 2.35. IR (neat) ν<sub>max</sub> 2917.5 (s), 2837.1 (s), 1616.6 (s), 1480.3 (s), 1451.1 (s), 1240.4 (s), 1143.1 (s), 1111.5 (m), 993.2 (s), 867.3 (s), 765 (s), 723 (s). HRMS (DART) for C<sub>23</sub>H<sub>37</sub>NO<sub>2</sub>B [M+H]<sup>+</sup>: Calc'd: 370.2917, found: 370.2917.

**Analysis of Stereochemistry:**

Racemic compound was prepared according to the general **procedure A** with 2,2'-bipy (6 mol%) as the ligand. Absolute stereochemistry was assigned by analogy (see product **34**, **19**).

Chiral SFC (Chiracel OJ-H, 10% IPA, 3 mL/min, 100 bar, 35 °C, 210-289 nm) – analysis of (*R*)-2-(2-(9-borabicyclo[3.3.1]nonan-9-yl)-6-(1,3-dioxan-2-yl)hexyl)pyridine.

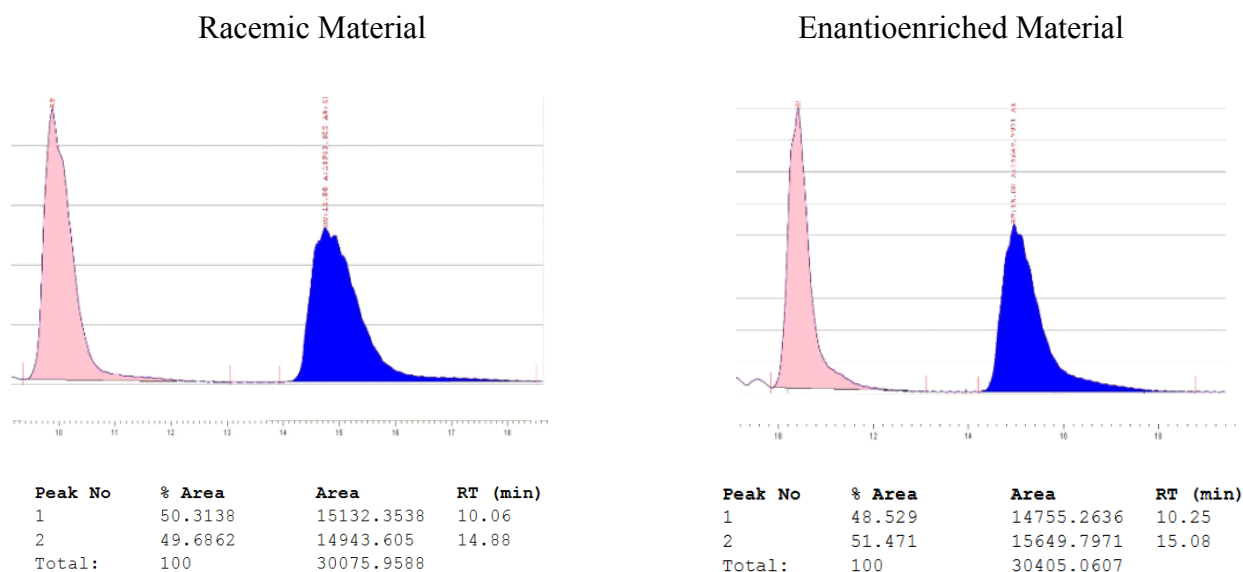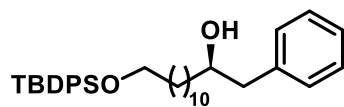**(*R*)-13-((*tert*-butyldiphenylsilyloxy)-1-phenyltridecan-2-ol (14).**

The reaction was performed according to the general **procedure B** with 9-BBN in THF (0.48 mL, 0.5 M, 0.24 mmol, 1.20 equiv.), (32.7 mg, 0.24 mmol, 1.20 equiv.), halide-free vinyl lithium in THF (0.15 mL, 1.47 M, 0.22 mmol, 1.10 equiv.), *tert*-butyldiphenyl(undec-10-en-1-yloxy)silane (**S-11**) (98.1 mg, 0.24 mmol, 1.20 equiv.), a solution of Ni(acac)<sub>2</sub> (2.57 mg, 0.010 mmol, 0.050 equiv.) and (***R,R***)-**L6** (2.88 mg, 0.012 mmol, 0.060 equiv.) in THF (0.4 mL), iodobenzene (40.8 mg, 0.20 mmol, 1.00 equiv.) The crude mixture was purified by silica gel chromatography (40% DCM in hexanes, stained with CAM) to afford a colorless oil (78.5 mg, 74% yield).

<sup>1</sup>H NMR (600 MHz, CDCl<sub>3</sub>) δ 7.69-7.65 (m, 4H), 7.44-7.35 (m, 6H), 7.34-7.29 (m, 2H), 7.26-7.20 (m, 3H), 3.86 (m, 1H), 3.65 (t, *J* = 6.5 Hz, 2H), 2.84 (dd, *J* = 13.6, 4.2 Hz, 1H), 2.65 (dd, *J* = 13.6, 8.5 Hz, 1H), 1.59-1.27 (m, 20H), 1.05 (s, 9H). <sup>13</sup>C NMR (150 MHz, CD<sub>3</sub>CN) δ 138.94, 134.54, 133.19, 128.85, 128.59, 127.24, 126.87, 125.02, 71.16, 62.94, 42.93, 35.98, 31.40, 29.04, 28.53, 28.49, 28.43, 28.40, 28.13, 25.43, 24.63, 24.59, 17.94. IR (neat) ν<sub>max</sub> 3387.23 (br, w),

2926.31 (s), 2854.13 (m), 1463.04 (w), 1427.68 (w), 1389.36 (w), 1360.85 (w), 1109.82 (s), 1030.21 (w), 1007.61 (w), 823.15 (w), 739.64 (m), 700.25 (s), 613.40 (m), 504.73 (m), 490.04 (w)  $\text{cm}^{-1}$ . **HRMS** (DART) for  $\text{C}_{35}\text{H}_{51}\text{O}_2\text{Si}$   $[\text{M}+\text{H}]^+$ : Calc'd: 531.3658, found: 531.3682.  $[\alpha]_{\text{D}}^{20} = -0.546$  ( $c = 1.83$ ,  $\text{CHCl}_3$ ,  $l = 50$  mm).

### Analysis of Stereochemistry:

Racemic compound was prepared according to the general **procedure B** with 2,2'-bipy (6 mol%) as the ligand. Absolute stereochemistry was assigned by analogy (see product **34**, **19**).

Chiral SFC (Chiracel ODR-H, 10% IPA, 3 mL/min, 100 bar, 35 °C, 210-289 nm) – analysis of (*R*)-13-((*tert*-butyldiphenylsilyl)oxy)-1-phenyltridecan-2-ol.

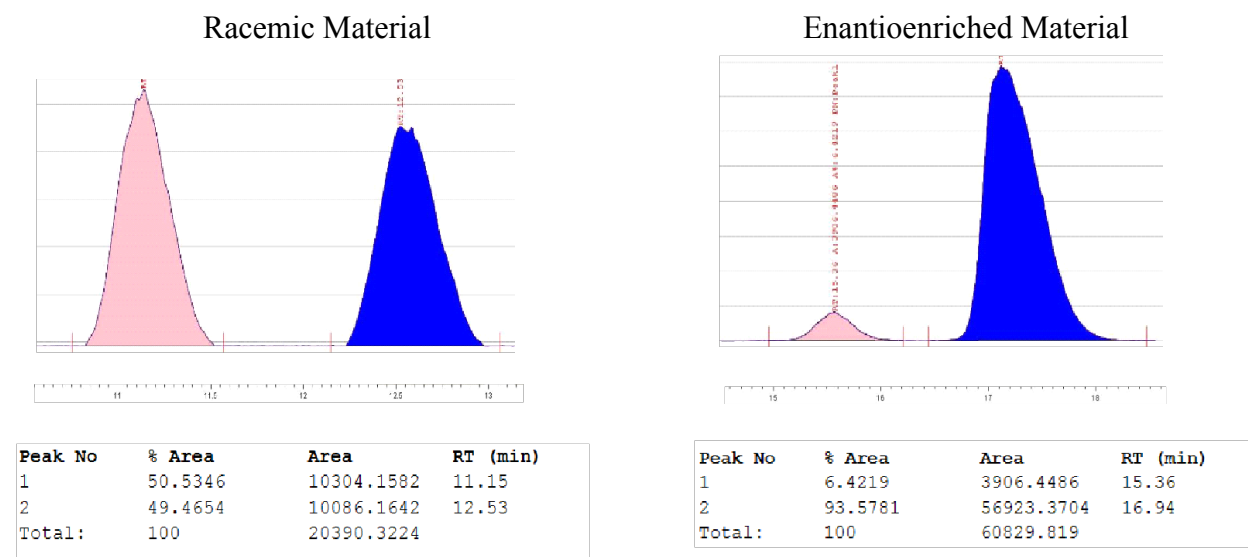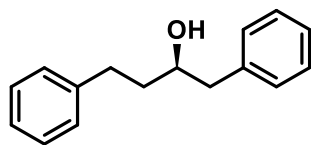

**(*R*)-1,4-diphenylbutan-2-ol (15)**. The reaction was performed according to the general **procedure A** with 9-BBN in THF (0.48 mL, 0.5 M, 0.24 mmol, 1.20 equiv.), (32.7 mg, 0.24 mmol, 1.20 equiv.), halide-free vinyl lithium in THF (0.15 mL, 1.47 M, 0.22 mmol, 1.10 equiv.), styrene (25.0 mg, 0.24 mmol, 1.20 equiv.), a solution of  $\text{Ni}(\text{acac})_2$  (2.57 mg, 0.010 mmol, 0.050 equiv.) and **(*R,R*)-L6** (2.88 mg, 0.012 mmol, 0.060 equiv.) in THF (0.4 mL), iodobenzene (40.8 mg, 0.20 mmol, 1.00 equiv.) The crude mixture was purified by silica gel chromatography (60% DCM in hexanes, stained with CAM) to afford a colorless oil (22.6 mg, 50% yield).

$^1\text{H NMR}$  (500 MHz,  $\text{CDCl}_3$ )  $\delta$  7.38-7.14 (m, 10H), 3.92-3.80 (m, 1H), 2.90-2.82 (m, 2H), 2.76-2.66 (m, 2H), 1.94-1.77 (m, 2H), 1.53 (s, 1H).  $^{13}\text{C NMR}$  (150 MHz,  $\text{CDCl}_3$ )  $\delta$  142.18, 138.49, 129.58, 128.75, 128.60, 128.56, 126.69, 125.98, 72.10, 44.31, 38.59, 32.27. **IR** (neat)  $\nu_{\text{max}}$  3405.14 (br,s), 3083.98 (w), 3061.19 (w), 3025.99 (m), 2919.73 (w), 2857.89 (w), 1602.16 (w), 1494.75 (m), 1453.54 (m), 1081.23 (m), 1048.45 (m), 1030.25 (m), 746.25 (s), 698.64 (s), 494.02 (w)  $\text{cm}^{-1}$ . **HRMS** (DART) for  $\text{C}_{16}\text{H}_{19}\text{O}$   $[\text{M}+\text{NH}_4]^+$ : Calc'd: 244.1701, found: 244.1697.  $[\alpha]_{\text{D}}^{20} = +12.00$  ( $c = 0.83$ ,  $\text{CHCl}_3$ ,  $l = 50$  mm).

### Analysis of Stereochemistry:

Racemic compound was prepared according to the general **procedure A** with 2,2'-bipy (6 mol%) as the ligand. Absolute stereochemistry was assigned by analogy (see product **34**, **19**).

Chiral SFC (Chiracel OJ-H, 10% IPA, 3 mL/min, 100 bar, 35 °C, 210-289 nm) – analysis of (*R*)-1,4-diphenylbutan-2-ol.

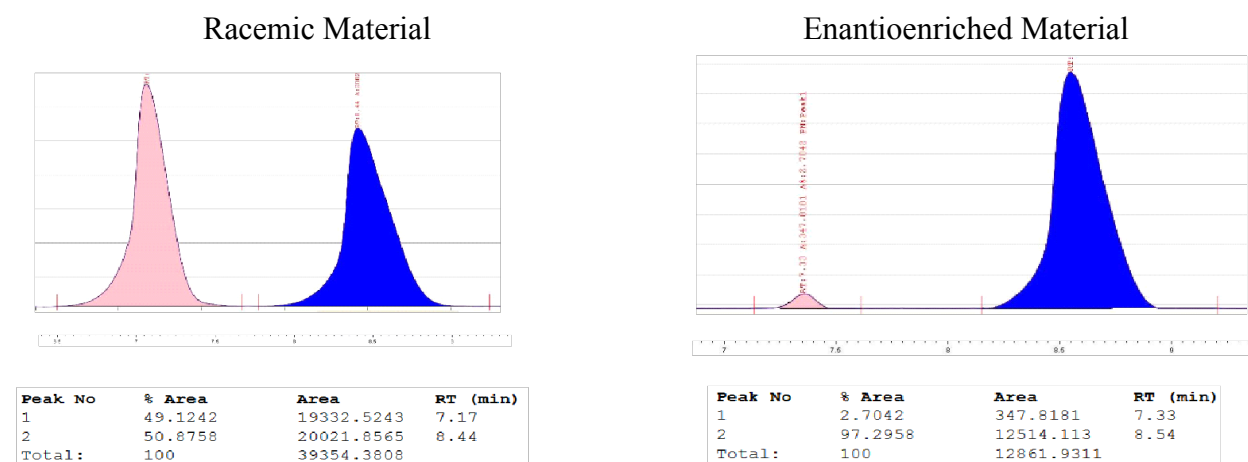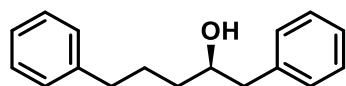

**(*R*)-1,5-diphenylpentan-2-ol (16)**. The reaction was performed according to the general **procedure A** with 9-BBN in THF (0.48 mL, 0.5 M, 0.24 mmol, 1.20 equiv.), (32.7 mg, 0.24 mmol, 1.20 equiv.), halide-free vinyl lithium in THF (0.15 mL, 1.47 M, 0.22 mmol, 1.10 equiv.), allylbenzene (28.4 mg, 0.24 mmol, 1.20 equiv.), a solution of  $\text{Ni}(\text{acac})_2$  (2.57 mg, 0.010 mmol, 0.050 equiv.) and **(*R,R*)-L6** (2.88 mg, 0.012 mmol, 0.060 equiv.) in THF (0.4 mL), iodobenzene (40.8 mg, 0.20 mmol, 1.00 equiv.) The crude mixture was purified by silica gel chromatography (65% DCM in hexanes, stained with CAM) to afford a colorless oil (24.0 mg, 50% yield).

$^1\text{H}$  NMR (500 MHz,  $\text{CDCl}_3$ )  $\delta$  7.37-7.14 (m, 10H), 3.90-3.80 (m, 1H), 3.83 (dd,  $J = 13.6, 4.1$  Hz, 1H), 2.69-2.60 (m, 3H), 1.91-1.80 (m, 1H), 1.78-1.65 (m, 1H), 1.64-1.51 (m, 2H), 1.48 (s, 1H).  $^{13}\text{C}$  NMR (150 MHz,  $\text{CDCl}_3$ )  $\delta$  142.52, 138.65, 129.56, 128.74, 128.57, 128.46, 126.64, 125.89, 72.67, 44.24, 36.55, 36.01, 27.75. IR (neat)  $\nu_{\text{max}}$  3405.14 (br,s), 3083.98 (w), 3061.19 (w), 3025.99 (m), 2919.73 (w), 2857.89 (w), 1602.16 (w), 1494.75 (m), 1453.54 (m), 1081.23 (m), 1048.45 (m), 1030.25 (m), 746.25 (s), 698.64 (s), 494.02 (w)  $\text{cm}^{-1}$ . HRMS (DART) for  $\text{C}_{17}\text{H}_{24}\text{NO}$   $[\text{M}+\text{NH}_4]^+$ : Calc'd: 258.1858, found: 258.1864.  $[\alpha]_{\text{D}}^{20} = -4.35$  ( $c = 0.86$ ,  $\text{CHCl}_3$ ,  $l = 50$  mm).

### Analysis of Stereochemistry:

Racemic compound was prepared according to the general **procedure A** with 2,2'-bipy (6 mol%) as the ligand. Absolute stereochemistry was assigned by analogy (see product **34**, **19**).

Chiral SFC (Chiracel OJ-H, 9% IPA, 3 mL/min, 100 bar, 35 °C, 210-289 nm) – analysis of (*R*)-1,5-diphenylpentan-2-ol.

Racemic Material

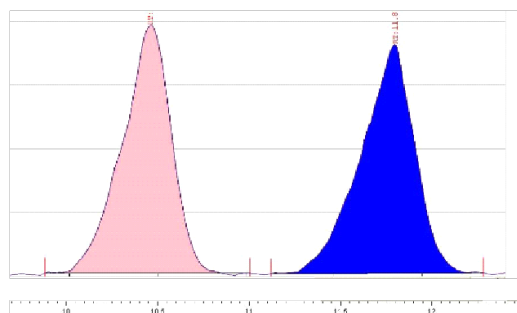

| Peak No | % Area  | Area      | RT (min) |
|---------|---------|-----------|----------|
| 1       | 49.8175 | 3788.1127 | 10.46    |
| 2       | 50.1825 | 3815.8682 | 11.85    |
| Total:  | 100     | 7603.9809 |          |

Enantioenriched Material

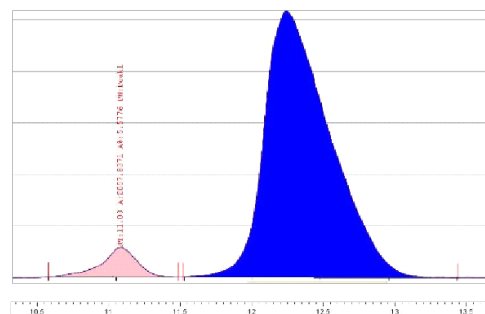

| Peak No | % Area  | Area       | RT (min) |
|---------|---------|------------|----------|
| 1       | 5.5776  | 2057.8371  | 11.03    |
| 2       | 94.4224 | 34836.7459 | 12.25    |
| Total:  | 100     | 36894.583  |          |

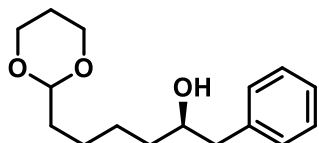

**(*R*)-6-(1,3-dioxan-2-yl)-1-phenylhexan-2-ol (17)**. The reaction was performed according to the general **procedure A** with 9-BBN in THF (0.48 mL, 0.5 M, 0.24 mmol, 1.20 equiv.), 2-(but-3-en-1-yl)-1,3-dioxane (**S-14**) (34.1 mg, 0.24 mmol, 1.20 equiv.), halide-free vinylolithium in THF (0.15 mL, 1.47 M, 0.22 mmol, 1.10 equiv.), a solution of  $\text{Ni}(\text{acac})_2$  (2.57 mg, 0.010 mmol, 0.050 equiv.) and (***R,R***)-**L6** (2.88 mg, 0.012 mmol, 0.060 equiv.) in THF (0.4 mL), iodobenzene (40.8 mg, 0.20 mmol, 1.00 equiv.) The crude mixture was purified by silica

gel chromatography (30% EtOAc in hexanes, stained with CAM) to afford a colorless oil (33.4 mg, 63% yield).

**<sup>1</sup>H NMR** (500 MHz, CDCl<sub>3</sub>) δ 7.41-7.12 (m, 5H), 4.51 (t, *J* = 5.1 Hz, 1H), 4.09 (dd, *J* = 12.2, 4.9 Hz, 2H), 3.83-3.72 (m, 1H), 3.75 (td, *J* = 12.2, 2.4 Hz, 2H), 2.81 (dd, *J* = 13.5, 4.2 Hz, 1H), 2.64 (dd, *J* = 13.5, 8.3 Hz, 1H), 2.14-2.01 (m, 1H), 1.73-1.24 (m, 9H). **<sup>13</sup>C NMR** (150 MHz, CDCl<sub>3</sub>) δ 138.71, 129.54, 128.65, 126.54, 102.40, 72.63, 67.01, 44.19, 36.81, 35.27, 25.97, 25.74, 24.07. **IR** (neat)  $\nu_{\max}$  3451.27 (br, w), 2929.58 (s), 2855.69 (s), 1454.85 (w), 1403.76 (w), 1377.78 (w), 1240.40 (w), 1144.35 (s), 1093.42 (m), 1029.47 (m), 997.56 (m), 747.24 (w), 700.91 (m) cm<sup>-1</sup>. **HRMS** (DART) for C<sub>16</sub>H<sub>25</sub>O<sub>3</sub> [M+H]<sup>+</sup>: Calc'd: 265.1804, found: 265.1796. **[ $\alpha$ ]<sub>D</sub><sup>20</sup>** = -5.473 (*c* = 1.90, CHCl<sub>3</sub>, *l* = 50 mm).

### Analysis of Stereochemistry:

Racemic compound was prepared according to the general **procedure A** with 2,2'-bipy (6 mol%) as the ligand. Absolute stereochemistry was assigned by analogy (see product **34**, **19**).

Chiral SFC (Chiracel OD-H, 2% IPA, 3 mL/min, 100 bar, 35 °C, 210-289 nm) – analysis of (*R*)-6-(1,3-dioxan-2-yl)-1-phenylhexan-2-ol.

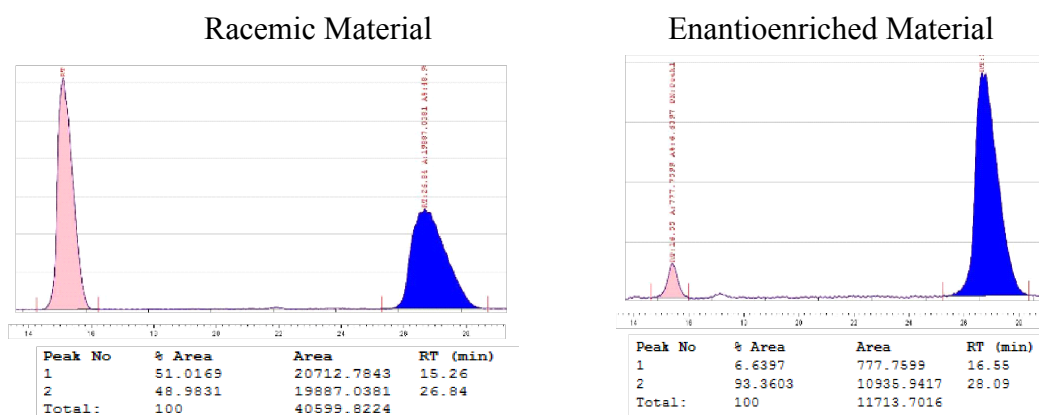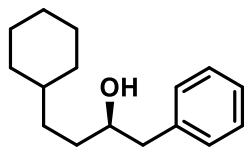

**(*R*)-4-cyclohexyl-1-phenylbutan-2-ol (18)**. The reaction was performed according to the general **procedure A** with 9-BBN in THF (0.48 mL, 0.5 M, 0.24 mmol, 1.20

equiv.), vinylcyclohexane (26.4 mg, 0.24 mmol, 1.20 equiv.), halide-free vinylolithium in THF (0.15 mL, 1.47 M, 0.22 mmol, 1.10 equiv.), a solution of Ni(acac)<sub>2</sub> (2.57 mg, 0.010 mmol, 0.050 equiv.) and **(R,R)**-L6 (2.88 mg, 0.012 mmol, 0.060 equiv.) in THF (0.4 mL), iodobenzene (40.8 mg, 0.20 mmol, 1.00 equiv.) The crude mixture was purified by silica gel chromatography (50% DCM in hexanes, stained with CAM) to afford a white solid (27.0 mg, 58% yield).

<sup>1</sup>H NMR (500 MHz, CDCl<sub>3</sub>) δ 7.32-7.20 (m, 5H), 3.82-3.75 (m, 1H), 2.84 (dd, *J* = 13.6, 4.2 Hz, 1H), 2.65 (dd, *J* = 13.6, 8.4 Hz, 1H), 1.75-0.80 (m, 15H). <sup>13</sup>C NMR (150 MHz, CDCl<sub>3</sub>) δ 138.81, 129.56, 129.55, 128.68, 128.67, 126.56, 73.18, 44.17, 44.15, 37.92, 34.33, 33.64, 33.57, 33.46, 26.84, 26.55, 26.53. IR (neat) ν<sub>max</sub> 3364.05 (br, w), 2920.43 (s), 2849.78 (m), 1495.12 (w), 1450.29 (m), 1079.83 (w), 1030.64 (m), 741.30 (w), 699.12 (m) cm<sup>-1</sup>. HRMS (DART) for C<sub>16</sub>H<sub>28</sub>NO [M+NH<sub>4</sub>]<sup>+</sup>: Calc'd: 250.2171, found: 250.2173. [α]<sub>D</sub><sup>20</sup> = -8.394 (*c* = 1.42, CHCl<sub>3</sub>, *l* = 50 mm).

### Analysis of Stereochemistry:

Racemic compound was prepared according to the general **procedure A** with 2,2'-bipy (6 mol%) as the ligand. Absolute stereochemistry was assigned by analogy (see product **34**, **19**).

Chiral SFC (Chiralcel OD-H, 2% IPA, 3 mL/min, 100 bar, 35 °C, 210-289 nm) – analysis of (R)-4-cyclohexyl-1-phenylbutan-2-ol.

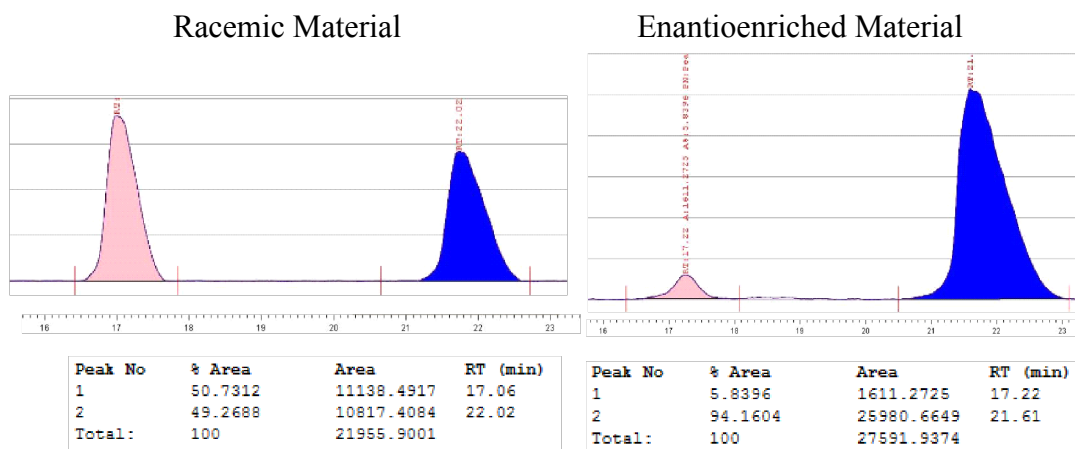



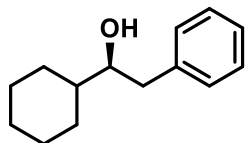

**(R)-1-cyclohexyl-2-phenylethan-1-ol (19).** The reaction was performed according to the general **procedure A** with 9-BBN in THF (0.48 mL, 0.5 M, 0.24 mmol, 1.20 equiv.), cyclohexene (19.7 mg, 0.24 mmol, 1.20 equiv.), halide-free vinylolithium in THF (0.15 mL, 1.47 M, 0.22 mmol, 1.10 equiv.), a solution of Ni(acac)<sub>2</sub> (2.57 mg, 0.010 mmol, 0.050 equiv.) and **(R,R)-L6** (2.88 mg, 0.012 mmol, 0.060 equiv.) in THF (0.4 mL), iodobenzene (40.8 mg, 0.20 mmol, 1.00 equiv.) The crude mixture was purified by silica gel chromatography (50% DCM in hexanes, stained with CAM) to afford a white solid (20.4 mg, 50% yield). Spectral data matches previously published results.<sup>16</sup> The optical rotation and SFC traces obtained support the assignment of absolute configuration  $[\alpha]_D^{20} = -3.839$  ( $c = 1.00$ , CHCl<sub>3</sub>,  $l = 50$  mm).

### Analysis of Stereochemistry:

Racemic compound was prepared according to the general **procedure A** with 2,2'-bipy (6 mol%) as the ligand. Absolute stereochemistry was assigned by analogy (see product **34**, **19**).

Chiral SFC (Chiracel OD-H, 5% IPA, 3 mL/min, 100 bar, 35 °C, 210-289 nm) – analysis of (R)-1-cyclohexyl-2-phenylethan-1-ol.

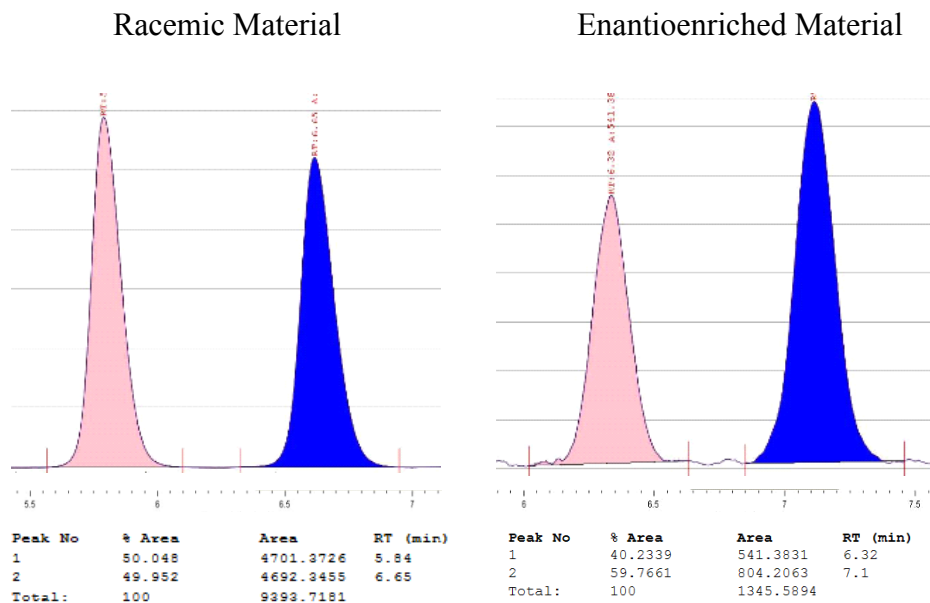

<sup>16</sup> Zhang, L.; Lovinger, G. J.; Edelstein, E. K.; Szymaniak, A. A.; Chierchia, M. P.; Morken, J. *P. Science* **2015**, *351* (6268), 70.

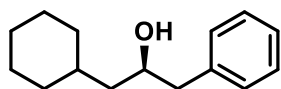

**(R)-1-cyclohexyl-3-phenylpropan-2-ol (20).** The reaction was performed according to the general **procedure A** with 9-BBN in THF (0.48 mL, 0.5 M, 0.24 mmol, 1.20 equiv.), methylenecyclohexane (23.1 mg, 0.24 mmol, 1.20 equiv.), halide-free vinylolithium in THF (0.15 mL, 1.47 M, 0.22 mmol, 1.10 equiv.), a solution of Ni(acac)<sub>2</sub> (2.57 mg, 0.010 mmol, 0.050 equiv.) and **(R,R)-L6** (2.88 mg, 0.012 mmol, 0.060 equiv.) in THF (0.4 mL), iodobenzene (40.8 mg, 0.20 mmol, 1.00 equiv.) The crude mixture was purified by silica gel chromatography (50% DCM in hexanes, stained with CAM) to afford a white solid (27.0 mg, 58% yield). <sup>1</sup>H NMR (500 MHz, CDCl<sub>3</sub>) δ 7.38-7.25 (m, 2H), 7.28-7.15 (m, 3H), 4.02-3.90 (m, 1H), 2.81 (dd, *J* = 13.6, 4.1 Hz, 1H), 2.63 (dd, *J* = 13.6, 8.4 Hz, 1H), 1.85-1.74 (m, 1H), 1.75-1.60 (m, 4H), 1.57-1.08 (m, 8H), 1.03-0.79 (2H). <sup>13</sup>C NMR (126 MHz, CDCl<sub>3</sub>) δ 138.61, 129.40, 128.52, 126.41, 70.02, 44.69, 44.62, 34.17, 32.87, 26.59, 26.37, 26.19. : IR (neat)  $\nu_{\max}$  3399.8 (br, s), 3027.2 (w, m), 2920.4 (s), 2850 (s), 1601.1 (w), 1495.1 (s), 1134.4 (s), 1077 (s), 745 (s), 699 (s), 523 (w, s). HRMS (DART) for C<sub>15</sub>H<sub>21</sub> [M+H-H<sub>2</sub>O]<sup>+</sup>: Calc'd: 201.1643, found 201.1650: 201.165. [ $\alpha$ ]<sub>D</sub><sup>20</sup> = .9333 (*c* = 1.00, CHCl<sub>3</sub>, *l* = 50 mm).

### Analysis of Stereochemistry:

Racemic compound was prepared according to the general **procedure A** with 2,2'-bipy (6 mol%) as the ligand. Absolute stereochemistry was assigned by analogy (see product **34, 19**).

Chiral SFC (Chiracel OD-H, 5% IPA, 3 mL/min, 100 bar, 35 °C, 210-289 nm) – analysis of (R)-4-cyclohexyl-1-phenylbutan-2-ol.

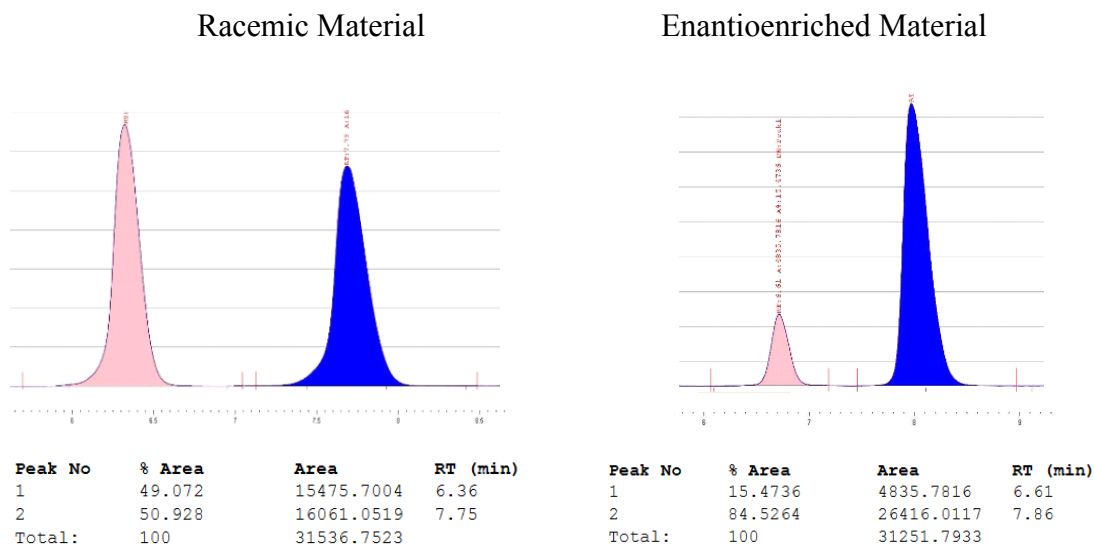

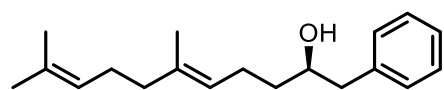**(*R,E*)-6,10-dimethyl-1-phenylundeca-5,9-dien-2-ol (21).**

The reaction was performed according to the general **procedure A** with 9-BBN in THF (0.48 mL, 0.5 M, 0.24 mmol, 1.20 equiv.), (*E*)-4,8-dimethylnona-1,3,7-triene (**S-18**) (36 mg, 0.24 mmol, 1.20 equiv.), halide-free vinylolithium in THF (0.15 mL, 1.47 M, 0.22 mmol, 1.10 equiv.), a solution of Ni(acac)<sub>2</sub> (2.57 mg, 0.010 mmol, 0.050 equiv.) and (*R,R*)-**L6** (2.88 mg, 0.012 mmol, 0.060 equiv.) in THF (0.4 mL), iodobenzene (40.8 mg, 0.20 mmol, 1.00 equiv.) The crude mixture was purified by silica gel chromatography (50% DCM in hexanes, stained with CAM) to afford a colorless oil (21.2 mg, 39% yield).

<sup>1</sup>H NMR (400 MHz, CDCl<sub>3</sub>) δ 7.35-7.20 (m, 5H), 5.18-5.10 (m, 1H), 5.12-5.05 (m, 1H), 3.89-3.79 (m, 1H), 2.83 (dd, *J* = 13.6, 4.3 Hz, 1H), 2.67 (dd, *J* = 13.6, 8.3 Hz, 1H), 2.25-1.97 (m, 6H), 1.68 (s, 3H), 1.64-1.53 (m, 8H). <sup>13</sup>C NMR (150 MHz, CDCl<sub>3</sub>) δ 138.78, 135.91, 131.57, 129.58, 128.67, 126.56, 124.40, 124.04, 72.56, 44.21, 39.87, 36.87, 26.81, 25.84, 24.48, 17.84, 16.18. IR (neat) ν<sub>max</sub> 3398.31 (br, w), 3027.30 (w), 2963.82 (m), 2923.30 (s), 2854.82 (m), 1495.43 (w), 1452.74 (m), 1376.82 (w), 1081.10 (w), 740.88 (w), 699.60 (w) cm<sup>-1</sup>. HRMS (DART) for C<sub>19</sub>H<sub>29</sub>O [M+H]<sup>+</sup>: Calc'd: 273.2218, found: 273.2222. [α]<sub>D</sub><sup>20</sup> = -2.695 (*c* = 1.63, CHCl<sub>3</sub>, *l* = 50 mm).

### Analysis of Stereochemistry:

Racemic compound was prepared according to the general **procedure A** with 2,2'-bipy (6 mol%) as the ligand. Absolute stereochemistry was assigned by analogy (see product **34**, **19**).

Chiral SFC (Chiracel OD-H, 2% IPA, 3 mL/min, 100 bar, 35 °C, 210-289 nm) – analysis of (*R,E*)-6,10-dimethyl-1-phenylundeca-5,9-dien-2-ol.

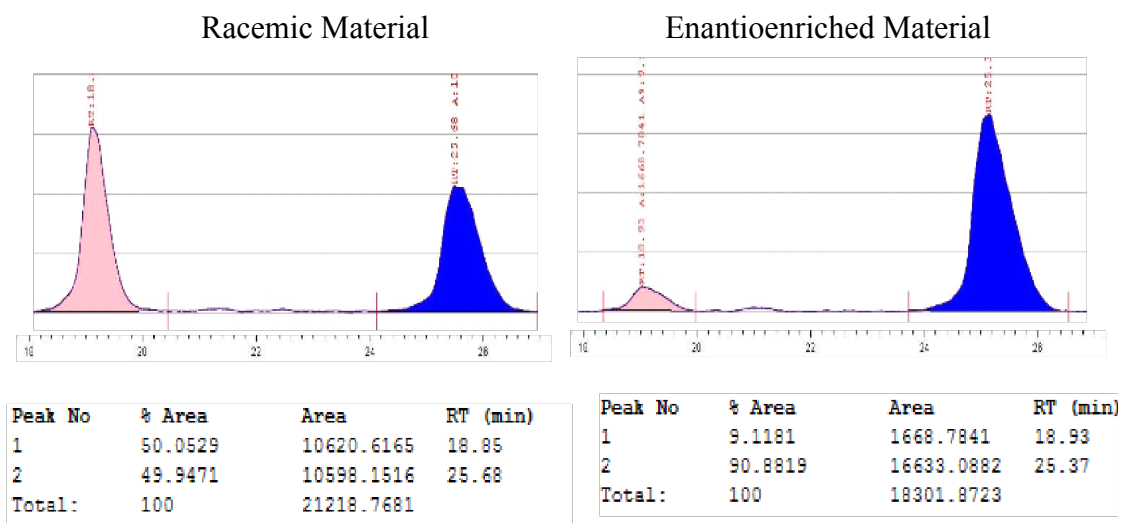

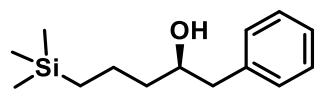

**(R)-1-phenyl-5-(trimethylsilyl)pentan-2-ol (22).** The reaction was performed according to the general **procedure B** with 9-BBN in THF (0.48 mL, 0.5 M, 0.24 mmol, 1.20 equiv.), allyltrimethylsilane (27.4 mg, 0.24 mmol, 1.20 equiv.), halide-free vinylolithium in THF (0.15 mL, 1.47 M, 0.22 mmol, 1.10 equiv.), a solution of Ni(acac)<sub>2</sub> (2.57 mg, 0.010 mmol, 0.050 equiv.) and **(R,R)-L6** (2.88 mg, 0.012 mmol, 0.060 equiv.) in THF (0.4 mL), iodobenzene (40.8 mg, 0.20 mmol, 1.00 equiv.) The crude mixture was purified by silica gel chromatography (60% DCM in hexanes, stained with CAM) to afford a colorless oil (26.1 mg, 55% yield).

<sup>1</sup>H NMR (600 MHz, CDCl<sub>3</sub>) δ 7.734-7.30 (m, 2H), 7.25-7.21 (m, 3H), 3.88-3.80 (m, 1H), 2.82 (dd, *J* = 13.6, 4.3 Hz, 1H), 2.66 (dd, *J* = 13.4, 8.4 Hz, 1H), 1.63-1.43 (m, 4H), 1.43-1.34 (m, 1H), 0.66-0.42 (m, 2H), -0.01 (s, 9H). <sup>13</sup>C NMR (126 MHz, CDCl<sub>3</sub>) δ 138.62, 129.40, 128.52, 126.41, 72.40, 44.15, 40.74, 20.17, 16.71, -1.66. IR (neat) ν<sub>max</sub> 3404.2 (br, s) 3028.4 (w, s), 2950.1 (s), 2950 (s), 2858.1, 1495.0 (w, m), 1409.3 (w, s), 1247.2 (s), 1173.1 (s), 861.9 (m), 740.5 (s), 698.3 (s) cm<sup>-1</sup>. HRMS (DART) for C<sub>14</sub>H<sub>28</sub>OSiN [M+NH<sub>4</sub>]<sup>+</sup>: Calc'd: 254.1953, found: 254.1940 [α]<sub>D</sub><sup>20</sup> = -1.741 (*c* = 1.00, CHCl<sub>3</sub>, *l* = 50 mm).

#### Analysis of Stereochemistry:

Racemic compound was prepared according to the general **procedure B** with 2,2'-bipy (6 mol%) as the ligand. Absolute stereochemistry was assigned by analogy (see product **34**, **19**).

Chiral SFC (Chiracel OJ-H, 2% IPA, 3 mL/min, 100 bar, 35 °C, 210-289 nm) – analysis of (R)-1-phenyl-5-(trimethylsilyl)pentan-2-ol.

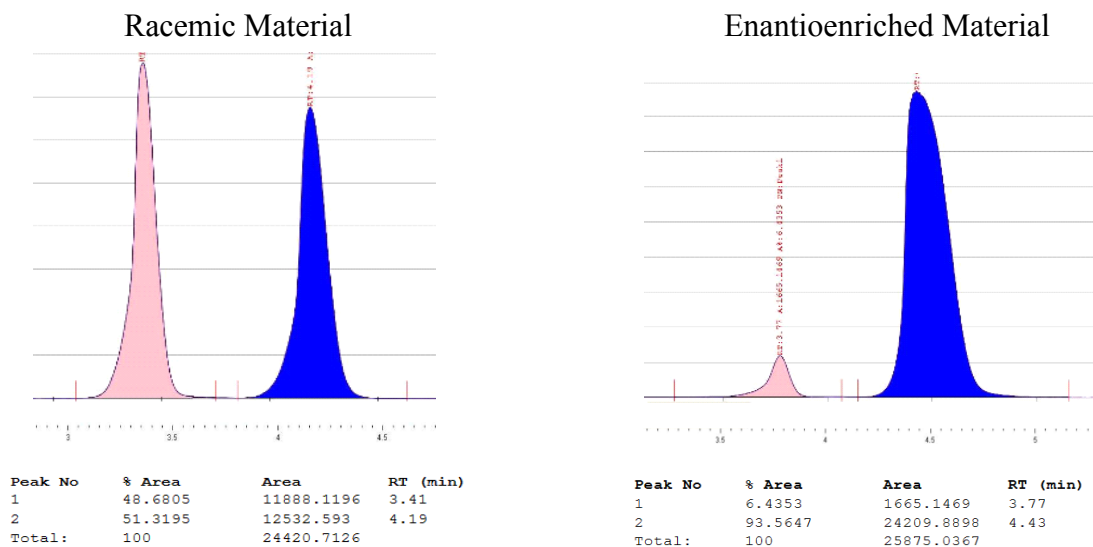

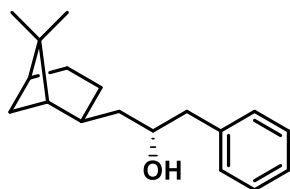

**(R)-1-((1S,2S,5S)-6,6-dimethylbicyclo[3.1.1]heptan-2-yl)-3-phenylpropan-2-ol (23).** The reaction was performed according to the general **procedure A** with 9-BBN in THF (0.48 mL, 0.5 M, 0.24 mmol, 1.20 equiv.), (1S)-(-)- $\beta$ -pinene (32.7 mg, 0.24 mmol, 1.20 equiv.), halide-free vinyl lithium in THF (0.15 mL, 1.47 M, 0.22 mmol, 1.10 equiv.), a solution of Ni(acac)<sub>2</sub> (2.57 mg, 0.010 mmol, 0.050 equiv.) and **(R,R)-L6** (2.88 mg, 0.012 mmol, 0.060 equiv.) in THF (0.4 mL), iodobenzene (40.8 mg, 0.20 mmol, 1.00 equiv.) The crude mixture was purified by silica gel chromatography (70% DCM in hexanes, stained with CAM) to afford an inseparable mixture of diastereomers as a colorless oil (30.5 mg, 59% yield).

**<sup>1</sup>H NMR** (500 MHz, CDCl<sub>3</sub>) Major diastereomer:  $\delta$  7.35-7.19 (m, 5H), 3.91-3.83 (m, 1H), 2.83 (dd,  $J = 13.5, 4.5$  Hz, 1H), 2.63 (dd,  $J = 13.5, 8.4$  Hz, 1H), 2.37-2.22 (m, 2H), 2.07-1.80 (m, 5H), 1.71-1.39 (m, 4H), 1.18 (s, 3H), 0.96 (s, 3H). Minor diastereomer:  $\delta$  7.35-7.19 (m, 5H), 3.91-3.83 (m, 1H), 2.82 (dd,  $J = 13.6, 4.8$  Hz, 1H), 2.63 (dd,  $J = 13.6, 8.1$  Hz, 1H), 2.37-2.22 (m, 2H), 2.07-1.80 (m, 5H), 1.71-1.39 (m, 4H), 1.20 (s, 3H), 0.99 (s, 3H). **<sup>13</sup>C NMR** (150 MHz, CDCl<sub>3</sub>) Major diastereomer:  $\delta$  138.70, 129.56, 128.67, 126.55, 71.24, 45.83, 44.84, 44.33, 41.61, 38.81, 37.83, 33.64, 28.34, 26.65, 23.35, 23.12. Minor diastereomer:  $\delta$  138.70, 129.56, 128.67, 126.55, 70.93, 47.48, 45.33, 44.91, 38.86, 37.37, 33.89, 31.73, 26.57, 23.42, 22.79, 22.19. **IR** (neat)  $\nu_{\max}$  3357.47 (br, s), 2903.85 (s), 1945.09 (w), 1467.93 (m), 1452.88 (m), 1382.91 (w), 1365.42 (w), 1080.38 (m), 1032.04 (m), 744.04 (s), 698.40 (s), 601.25 (w), 534.46 (w), 493.51 (w) cm<sup>-1</sup>. **HRMS** (DART) for C<sub>18</sub>H<sub>27</sub>O [M+H-H<sub>2</sub>O]<sup>+</sup>: Calc'd: 241.1956, found: 241.196. [ $\alpha$ ]<sub>D</sub><sup>20</sup> = -14.7488 ( $c = 1.92$ , CHCl<sub>3</sub>,  $l = 50$  mm).

**Analysis of Stereochemistry:**

The mixture of diastereomers was prepared according to the general **procedure A** with 2,2'-bipy (6 mol%) as the ligand. Hydroboration has previously been shown to occur from the face opposite to *gem*-dimethyl group of  **$\beta$ -pinene**.<sup>17</sup> Absolute stereochemistry was assigned by analogy (see product **34**, **19**).

*Chiral SFC (Chiracel OD-H, 2% IPA, 3 mL/min, 100 bar, 35 °C, 210-289 nm) – analysis of (R)-1-((1S,2S,5S)-6,6-dimethylbicyclo[3.1.1]heptan-2-yl)-3-phenylpropan-2-ol.*

Diastereomic Mixture

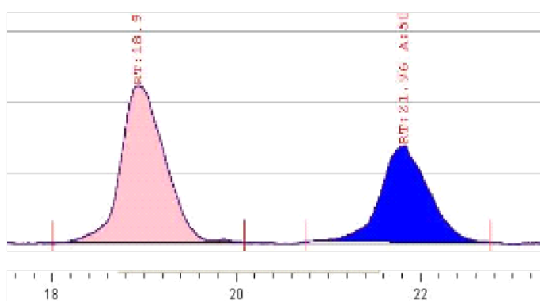

| Peak No | % Area  | Area       | RT (min) |
|---------|---------|------------|----------|
| 1       | 60.0783 | 7660.6494  | 18.97    |
| 2       | 39.9217 | 5090.4563  | 21.96    |
| Total:  | 100     | 12751.1057 |          |

Diastereoenriched Material

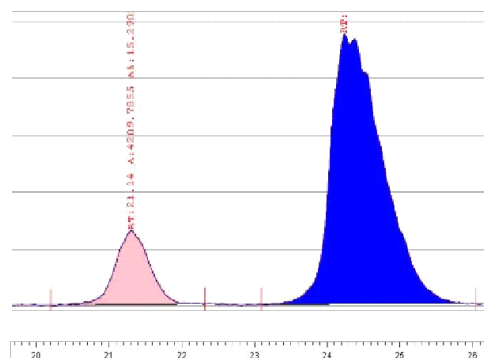

| Peak No | % Area  | Area       | RT (min) |
|---------|---------|------------|----------|
| 1       | 15.2902 | 4209.7855  | 21.14    |
| 2       | 84.7098 | 23322.8155 | 24.05    |
| Total:  | 100     | 27532.601  |          |

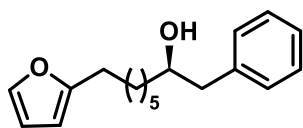

**(R)-8-(furan-2-yl)-1-phenyloctan-2-ol (24)**. The reaction was performed according to the general **procedure A** with 9-BBN in THF (0.48 mL, 0.5 M, 0.24 mmol, 1.20 equiv.), (32.7 mg, 0.24 mmol, 1.20 equiv.), halide-free vinyl lithium in THF (0.15 mL, 1.47 M, 0.22 mmol, 1.10 equiv.), 2-(hex-5-enyl)furan (**S-21**) (36.1 mg, 0.24 mmol, 1.20 equiv.), a solution of Ni(acac)<sub>2</sub> (2.57 mg, 0.010 mmol, 0.050 equiv.) and **(R,R)-L6** (2.88 mg,

<sup>17</sup> G. Zweifel, H. Brown, *J. Am. Chem. Soc.* **1964**, *86*, 393.

0.012 mmol, 0.060 equiv.) in THF (0.4 mL), iodobenzene (40.8 mg, 0.20 mmol, 1.00 equiv.) The crude mixture was purified by silica gel chromatography (10% EtOAc in hexanes, stained with CAM) to afford a yellow oil (36.8 mg, 73% yield).

$^1\text{H NMR}$  (500 MHz,  $\text{CDCl}_3$ )  $\delta$  7.41-7.06 (m, 6H), 6.28 (dd,  $J = 3.2, 1.9$  Hz, 1H), 5.98 (d,  $J = 3.2$  Hz, 1H), 3.90-3.77 (m, 1H), 2.83 (dd,  $J = 13.5, 4.2$  Hz, 1H), 2.69-2.58 (m, 3H), 1.74-1.25 (m, 10H).  $^{13}\text{C NMR}$  (150 MHz,  $\text{CDCl}_3$ )  $\delta$  156.63, 140.76, 138.75, 129.55, 128.69, 126.58, 110.16, 104.69, 72.78, 44.22, 36.92, 29.47, 29.24, 28.10, 28.06, 25.77. **IR** (neat)  $\nu_{\text{max}}$  3388.75 (br, w), 3026.89 (w), 2927.20 (s), 2855.02 (m), 1597.52 (w), 1506.89 (m), 1495.34 (m), 1453.85 (m), 1146.13 (m), 1076.43 (m), 1029.92 (m), 1006.94 (s), 922.05 (w), 884.47 (w), 852.54 (w), 795.29 (m), 726.11 (s), 699.16 (s), 599.28 (m), 543.22 (w), 505.67 (w)  $\text{cm}^{-1}$ . **HRMS** (DART) for  $\text{C}_{18}\text{H}_{25}\text{O}_2$   $[\text{M}+\text{H}]^+$ : Calc'd: 273.1855, found: 273.1845.  $[\alpha]_{\text{D}}^{20} = -5.92$  ( $c = 3.14$ ,  $\text{CHCl}_3$ ,  $l = 50$  mm).

### Analysis of Stereochemistry:

Racemic compound was prepared according to the general **procedure A** with 2,2'-bipy (6 mol%) as the ligand. Absolute stereochemistry was assigned by analogy (see product **34**, **19**).

Chiral SFC (Chiracel OJ-H, 5% IPA, 3 mL/min, 100 bar, 35 °C, 210-289 nm) – analysis of (*R*)-8-(furan-2-yl)-1-phenyloctan-2-ol.

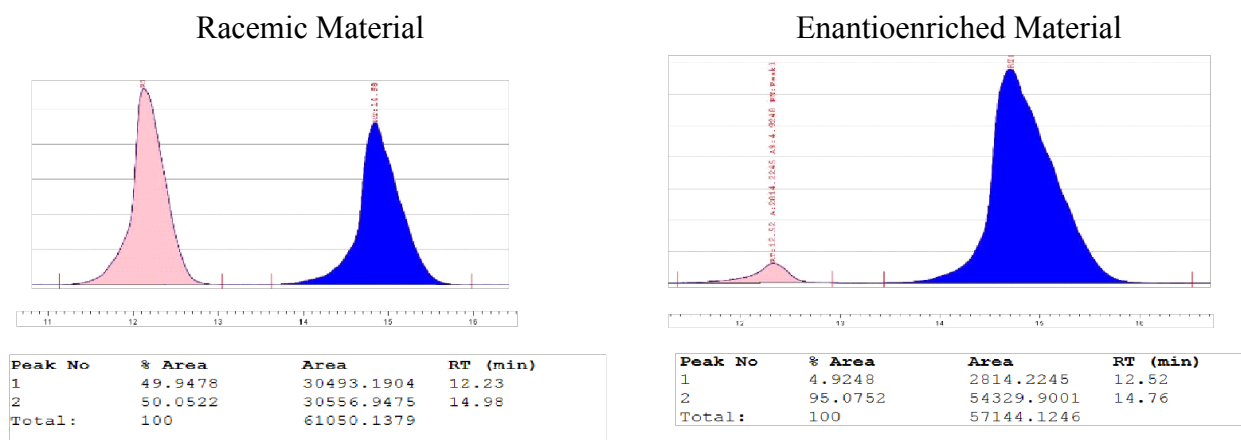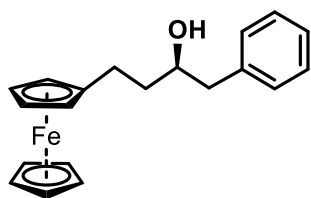

**(*R*)-1-phenyl-4-ferrocenylbutan-2-ol (25)**. The reaction was performed according to the general **procedure A** with 9-BBN in THF (0.48 mL, 0.5 M, 0.24 mmol, 1.20

equiv.), vinylferrocene (50.9mg mg, 0.24 mmol, 1.20 equiv.), halide-free vinyllithium in THF (0.15 mL, 1.47 M, 0.22 mmol, 1.10 equiv.), a solution of Ni(acac)<sub>2</sub> (2.57 mg, 0.010 mmol, 0.050 equiv.) and (**R,R**)-**L6** (2.88 mg, 0.012 mmol, 0.060 equiv.) in THF (0.4 mL), iodobenzene (40.8 mg, 0.20 mmol, 1.00 equiv.) The crude mixture was purified by silica gel chromatography (10% EtOAc in pentane, stained with CAM) to afford a red oil (36.1 mg, 53% yield).

**<sup>1</sup>H NMR** (600 MHz, CDCl<sub>3</sub>) δ 7.36-7.30 (m, 2H), 7.25-7.20 (m, 3H), 4.12-4.03 (m, 9H), 3.88-3.81 (m, 1H), 2.85 (dd, *J* = 13.6, 4.3 Hz, 1H), 2.69 (dd, *J* = 13.5, 8.4 Hz, 1H), 2.56 (ddd, *J* = 14.2, 9.8, 5.8 Hz, 1H) 2.42 (ddd, *J* = 14.3, 9.9, 6.4 Hz, 1H), 1.81-1.71 (m, 2H), 1.52 (s, 1H) **<sup>13</sup>C NMR** (151 MHz, CDCl<sub>3</sub>) δ 138.52, 129.55, 128.73, 126.66, 88.88, 72.48, 68.66, 68.29, 68.08, 67.32, 44.25, 38.21, 25.92. **IR** (neat) *v*<sub>max</sub> 3559.7 (w, s), 3400.5 (br, s), 3086.6 (m), 3025.9 (s), 2919.9 (s), 2853.5 (s), 1639.07 (br, s), 1601.7 (w, s), 1494.4 (s), 1470.9 (s), 1410.4 (s), 1154.7 (s), 1080.7 (m), 1080.71 (s), 1041.9 (s), 929.8 (s), 816.6 (s), 743.9 (s), 700.0 (s), 599.4 (w, s), 482.7 (s) cm<sup>-1</sup>. **HRMS** (DART) for C<sub>20</sub>H<sub>23</sub>OFe [M+H]<sup>+</sup>: Calc'd: 335.1098, found: 335.1113. [α]<sub>D</sub><sup>20</sup> = -15.472 (*c* = 1.00, CHCl<sub>3</sub>, *l* = 50 mm). [α]<sub>D</sub><sup>20</sup> = -1.741 (*c* = 1.00, CHCl<sub>3</sub>, *l* = 50 mm).

### Analysis of Stereochemistry:

Racemic compound was prepared according to the general **procedure A** with 2,2'-bipy (6 mol%) as the ligand. Absolute stereochemistry was assigned by analogy (see product **34**, **19**).

Chiral SFC (Chiracel OJ-H, 13% IPA, 3 mL/min, 100 bar, 35 °C, 210-289 nm) – analysis of (*R*)-1-phenyl-4-ferrocenylbutan-2-ol.

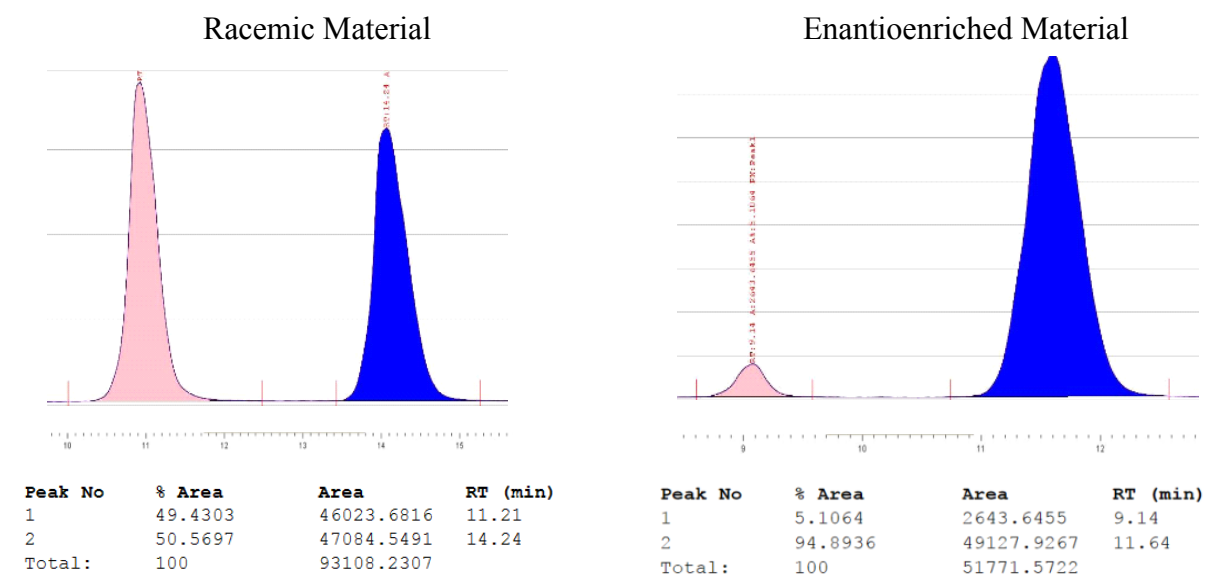



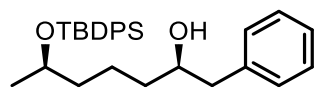**(2R,6R)-6-((tert-butyldiphenylsilyl)oxy)-1-phenylheptan-2-ol (26).**

The reaction was performed according to the general **procedure A** with 9-BBN in THF (0.48 mL, 0.5 M, 0.24 mmol, 1.20 equiv.), (R)-*tert*-butyl(pent-4-en-2-yloxy)diphenylsilane (**23**) (77.9 mg, 0.24 mmol, 1.20 equiv.), halide-free vinylolithium in THF (0.15 mL, 1.47 M, 0.22 mmol, 1.10 equiv.), a solution of Ni(acac)<sub>2</sub> (2.57 mg, 0.010 mmol, 0.050 equiv.) and (**R,R**)-**L6** (2.88 mg, 0.012 mmol, 0.060 equiv.) in THF (0.4 mL), iodobenzene (40.8 mg, 0.20 mmol, 1.00 equiv.) The crude mixture was purified by silica gel chromatography (50% DCM in hexanes, stained with CAM) to afford a colorless oil (66.0 mg, 74% yield).

<sup>1</sup>H NMR (500 MHz, CDCl<sub>3</sub>) δ 7.73-7.67 (m, 4H), 7.45-7.16 (m, 11H), 3.91-3.83 (m, 1H), 3.78-3.69 (m, 1H), 2.77 (dd, *J* = 13.6, 4.2 Hz, 1H), 2.60 (dd, *J* = 13.6, 6.8 Hz, 1H), 1.58-1.29 (m, 8 H), 1.15-1.10 (m, 12H). <sup>13</sup>C NMR (150 MHz, CDCl<sub>3</sub>) δ 136.04, 136.01, 129.60, 129.54, 128.67, 127.61, 127.54, 126.56, 72.67, 69.57, 44.12, 39.48, 36.90, 27.20, 23.37, 21.55, 19.42. IR (neat) ν<sub>max</sub> 3431.69 (br, w), 2930.37 (s), 2856.98 (m), 1472.08 (w), 1454.48 (w), 1427.39 (m), 1476.44 (w), 1134.39 (m), 1109.43 (s), 1075.12 (m), 1029.38 (m), 997.42 (w), 822.01 (w), 739.73 (s), 700.63 (s), 611.44 (m), 597.58 (s) cm<sup>-1</sup>. HRMS (DART) for C<sub>29</sub>H<sub>39</sub>O<sub>2</sub>Si [M+H]<sup>+</sup>: Calc'd: 447.2719, found: 447.2723. [α]<sub>D</sub><sup>20</sup> = +10.626 (*c* = 3.67, CHCl<sub>3</sub>, *l* = 50 mm).

### Analysis of Stereochemistry:

Racemic compound was prepared according to the general **procedure A** with 2,2'-bipy (6 mol%) as the ligand. Absolute stereochemistry was assigned by analogy (see product **34**, **19**).

Chiral SFC (Chiracel OJ-H, 5% IPA, 3 mL/min, 100 bar, 35 °C, 210-289 nm) – analysis of (2R,6R)-6-((tert-butyldiphenylsilyl)oxy)-1-phenylheptan-2-ol.

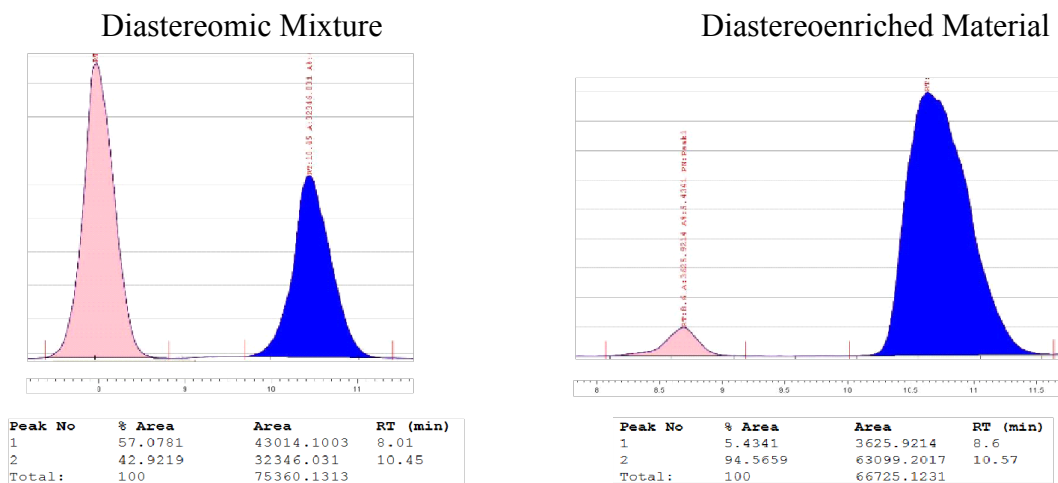

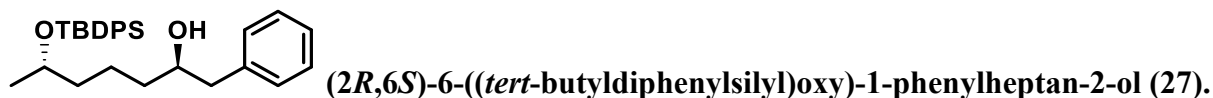

The reaction was performed according to the general **procedure A** with 9-BBN in THF (0.48 mL, 0.5 M, 0.24 mmol, 1.20 equiv.), (*S*)-*tert*-butyl(pent-4-en-2-yloxy)diphenylsilane (**24**) (77.9 mg, 0.24 mmol, 1.20 equiv.), halide-free vinylolithium in THF (0.15 mL, 1.47 M, 0.22 mmol, 1.10 equiv.), a solution of Ni(acac)<sub>2</sub> (2.57 mg, 0.010 mmol, 0.050 equiv.) and (*R,R*)-**L6** (2.88 mg, 0.012 mmol, 0.060 equiv.) in THF (0.4 mL), iodobenzene (40.8 mg, 0.20 mmol, 1.00 equiv.)

The crude mixture was purified by silica gel chromatography (50% DCM in hexanes, stained with CAM) to afford a colorless oil (66.0 mg, 74% yield).

**<sup>1</sup>H NMR** (500 MHz, CDCl<sub>3</sub>) δ 7.75-7.63 (m, 4H), 7.46-7.17 (m, 11H), 3.91-3.84 (m, 1H), 3.79-3.69 (m, 1H), 2.77 (dd, *J* = 13.6, 4.2 Hz, 1H), 2.60 (dd, *J* = 13.6, 8.4 Hz, 1H), 1.57-1.29 (m, 8H), 1.11-1.04 (m, 12H). **<sup>13</sup>C NMR** (150 MHz, CDCl<sub>3</sub>) δ 136.05, 136.04, 129.60, 129.56, 129.54, 128.67, 127.62, 127.54, 126.56, 72.63, 69.67, 44.07, 39.49, 36.93, 27.20, 23.40, 21.56, 19.41. **IR** (neat)  $\nu_{\max}$  3421.77 (br, w), 2930.61 (m), 2856.83 (m), 1495.23 (w), 1472.11 (w), 1427.36 (m), 1376.40 (w), 1361.13 (w), 1134.17 (w), 1109.29 (s), 1078.69 (m), 1049.03 (m), 1028.98 (m), 821.99 (w), 739.64 (m), 700.49 (s), 611.48 (m), 507.32 (m) cm<sup>-1</sup>. **HRMS** (DART) for C<sub>29</sub>H<sub>39</sub>O<sub>2</sub>Si [M+H]<sup>+</sup>: Calc'd: 447.2719, found: 447.2723. **[ $\alpha$ ]<sub>D</sub><sup>20</sup>** = -16.5218 (*c* = 3.06, CHCl<sub>3</sub>, *l* = 50 mm).

### Analysis of Stereochemistry:

Racemic compound was prepared according to the general **procedure A** with 2,2'-bipy (6 mol%) as the ligand. Absolute stereochemistry was assigned by analogy (see product **34**, **19**).

Chiral SFC (Chiracel OJ-H, 5% IPA, 3 mL/min, 100 bar, 35 °C, 210-289 nm) – analysis of (2*R*,6*S*)-6-((*tert*-butyldiphenylsilyl)oxy)-1-phenylheptan-2-ol.

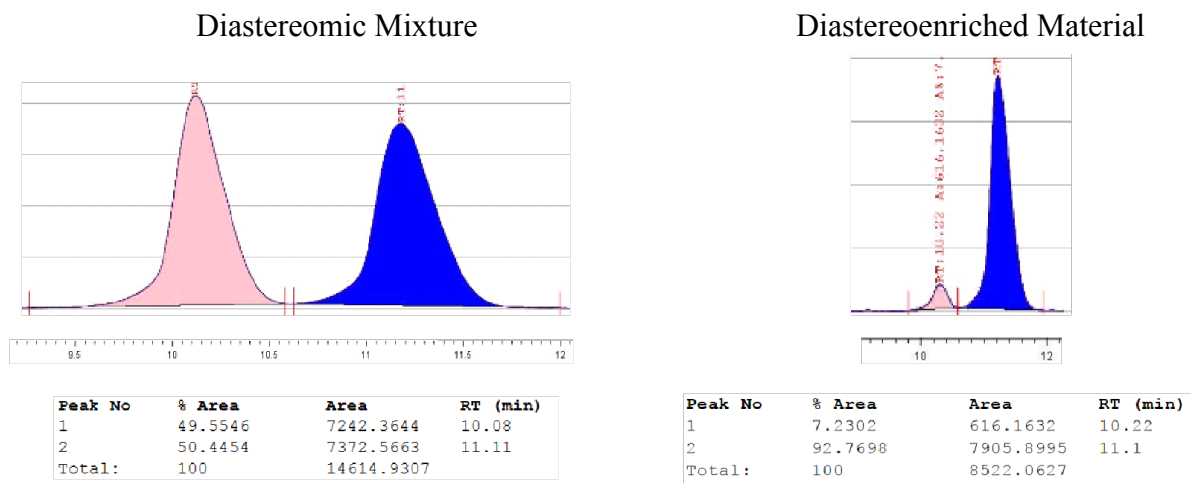

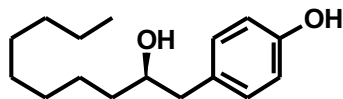

**(R)-4-(2-hydroxydecyl)phenol (32).** The reaction was performed according to the general **procedure A** with 9-BBN in THF (0.48 mL, 0.5 M, 0.24 mmol, 1.20 equiv.), 1-octene (26.9 mg, 0.24 mmol, 1.20 equiv.), halide-free vinylolithium in THF (0.15 mL, 1.47 M, 0.22 mmol, 1.10 equiv.), a solution of Ni(acac)<sub>2</sub> (2.57 mg, 0.010 mmol, 0.050 equiv.) and **(R,R)-L14** (2.88 mg, 0.012 mmol, 0.060 equiv.) in THF (0.4 mL), 4-iodophenylboronic acid pinacol ester (66.0 mg, 0.20 mmol, 1.00 equiv.) The crude mixture was purified by silica gel chromatography (20% EtOAc in hexanes, stained with CAM) to afford a white solid (37.8 mg, 75% yield).

<sup>1</sup>H NMR (400 MHz, CDCl<sub>3</sub>) δ 7.05 (d, *J* = 8.4 Hz, 2H), 6.75 (d, *J* = 8.4 Hz, 2H), 6.09-5.41 (br s, 1H), 4.06-3.55 (m, 1H), 2.77 (dd, *J* = 13.8, 4.2 Hz, 1H), 2.56 (dd, *J* = 13.8, 8.5 Hz, 1H), 1.64-1.06 (m, 14H), 0.88 (t, *J* = 6.5 Hz, 3H). <sup>13</sup>C NMR (126 MHz, CDCl<sub>3</sub>) δ 154.57, 130.65, 130.36, 115.63, 73.21, 43.11, 36.81, 32.00, 29.78, 29.70, 29.40, 25.90, 22.80, 14.24. IR (neat) ν<sub>max</sub> 3339.98 (br, w), 3212.56 (br, w), 3019.54 (w), 2956.78 (m), 2923.21 (s), 2854.02 (m), 1614.50 (w), 1598.03 (w), 1516.78 (s), 1455.78 (m), 1377.79 (w), 1253.90 (s), 1175.83 (w), 1102.56 (w), 1082.13 (w), 906.34 (s), 812.56 (s), 731.23 (s), 649.33 (w) cm<sup>-1</sup>. HRMS (DART) for C<sub>16</sub>H<sub>30</sub>O<sub>2</sub>N [M+NH<sub>4</sub>]<sup>+</sup>: Calc'd: 268.2277, found: 268.228. [α]<sub>D</sub><sup>20</sup> = -20.6985 (*c* = 0.93, CHCl<sub>3</sub>, *l* = 50 mm).

#### Analysis of Stereochemistry:

Racemic compound was prepared according to the general **procedure A** with 2,2'-bipy (6 mol%) as the ligand. Absolute stereochemistry was assigned by analogy (see product **32**, **16**).

Chiral SFC (Chiracel OJ-H, 8% IPA, 3 mL/min, 100 bar, 35 °C, 210-289 nm) – analysis of (R)-4-(2-hydroxydecyl)phenol.

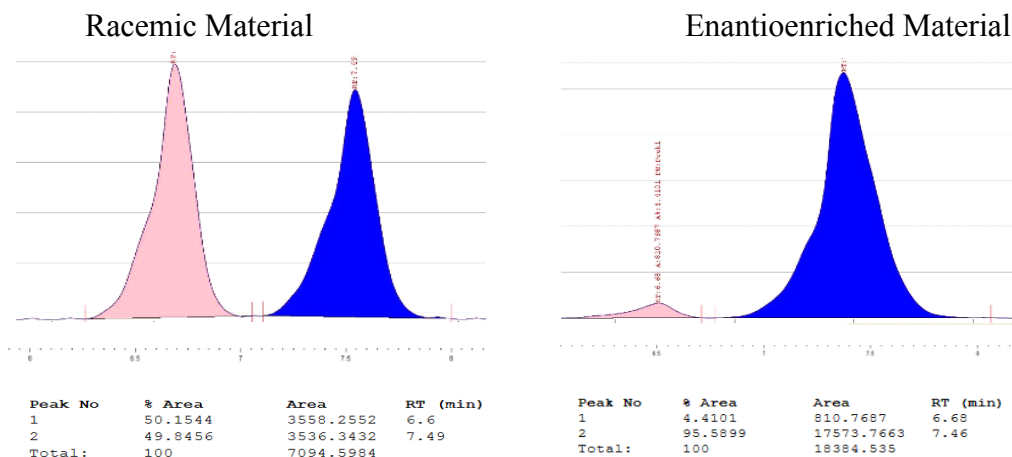

## V. Procedures and Characterization for Transformations of secondary 9-BBN Borates

## Cyanomethylation

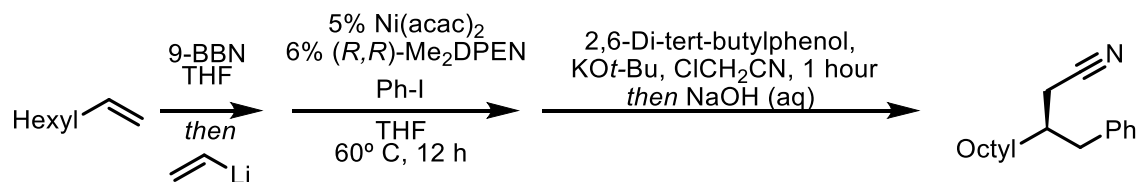**(R)-3-benzylundecanenitrile (28).**

The title compound was prepared from enantiomerically enriched 9-BBN products obtained through the general **procedure A** with 9-BBN in THF (0.48 mL, 0.5 M, 0.24 mmol, 1.20 equiv.), 1-octene (26.9 mg, 0.24 mmol, 1.20 equiv.), halide-free vinyl lithium in THF (0.15 mL, 1.47 M, 0.22 mmol, 1.10 equiv.), a solution of Ni(acac)<sub>2</sub> (2.57 mg, 0.010 mmol, 0.050 equiv.) and **(R,R)-L6** (2.88 mg, 0.012 mmol, 0.060 equiv.) in THF (0.4 mL), and iodobenzene (40.8 mg, 0.20 mmol, 1.00 equiv.), by replacing the oxidation step with a modification of the procedure reported by Brown.<sup>18</sup> After stirring at 60° C overnight the reaction mixture was cooled to 0°C and a solution of 2,6-di-tert-butylphenol (51.6 mg, 0.25 mmol, 1.25 equiv.) and KO<sup>t</sup>Bu (28.05 mg, 0.25 mmol, 1.25 equiv.) in 400 μL of THF was added to the vial followed by the addition of a solution of ClCH<sub>2</sub>CN (18.2 mg, 0.24 mmol, 1.20 equiv.) in 200 μL of THF. The reaction mixture was warmed to room temperature and stirred for 1 hour, after which time 2 mL of a 3M NaOH aqueous solution was added. The biphasic mixture was stirred for 30 minutes and the organic layer was extracted with Et<sub>2</sub>O 3 times, dried over MgSO<sub>4</sub> and concentrated in vacuo. The crude mixture was purified by silica gel chromatography (15% DCM in pentane, stain in PMA) to afford a yellow oil (27.7 mg, 57% yield). <sup>1</sup>H NMR (600 MHz, CDCl<sub>3</sub>) δ 7.56 – 6.88 (m, 5H), 2.83 (dd, *J* = 13.8, 5.7 Hz, 1H), 2.57 (dd, *J* = 13.8, 9.1 Hz, 1H), 2.28 (dd, *J* = 16.9, 5.3 Hz, 1H), 2.20 (dd, *J* = 16.8, 5.6 Hz, 1H), 2.01 – 1.92 (m, 1H), 1.53 – 1.21 (m, 14H), 0.89 (t, *J* = 7.0 Hz, 3H). <sup>13</sup>C NMR (151 MHz, CDCl<sub>3</sub>) δ 139.23, 129.18, 128.76, 126.65, 118.73, 39.99, 37.45, 33.57, 31.99, 29.70, 29.62, 29.39, 26.93, 22.81, 21.16, 14.25. IR (neat) ν<sub>max</sub> 3027 (w, s), 3034.8 (s), 2024.3 (s), 2854.4 (s), 2245.2 (s), 1603.1 (w, m), 1496.6 (s), 1377.3 (w, m), 1079.6 (w), 1030.5 (w), 741.1 (s), 701.8 (s) cm<sup>-1</sup>. HRMS (DART) for C<sub>18</sub>H<sub>31</sub>N<sub>2</sub> [M+NH<sub>4</sub>]<sup>+</sup>: Calc'd: 275.2487, found: 275.2475. [α]<sub>D</sub><sup>20</sup> = -21.315 (*c* = 1.0, CHCl<sub>3</sub>, *l* = 50 mm).

<sup>18</sup> H. Brown, H. Nambu, M. Rogić, *J. Am. Chem. Soc.* **1969**, *91*, 6854.

**Analysis of Stereochemistry:**

Racemic compound was prepared through to same reaction sequence with 2,2'-bipy (6 mol%) as the ligand. Absolute stereochemistry was assigned by analogy (see product **34**, **19**).

Chiral SFC (Chiracel AD-H, 1 % IPA, 3 mL/min, 100 bar, 35 °C, 210-289 nm) – analysis of tert-butyl (*R*)-3-benzylundecanenitrile.

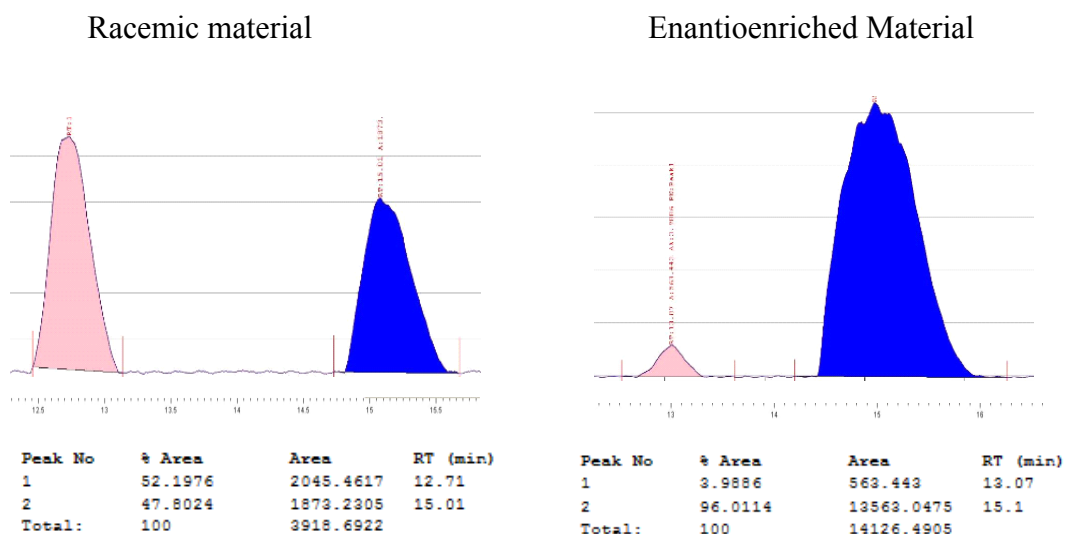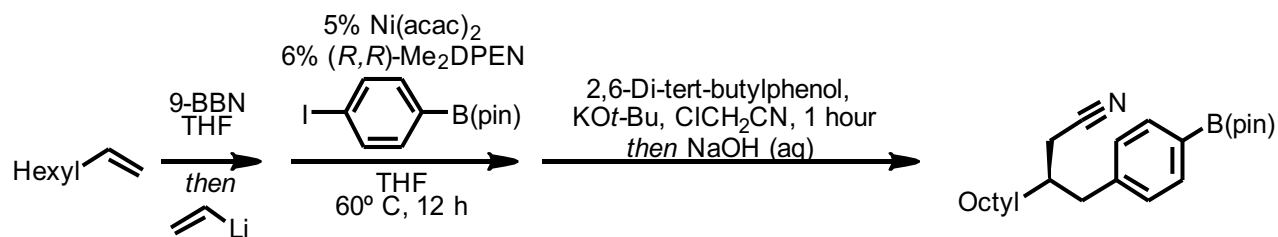**(*R*)-3-(4-(4,4,5,5-tetramethyl-1,3,2-dioxaborolan-2-yl)benzyl)undecanenitrile (33).**

The title compound was prepared from enantiomerically enriched 9-BBN products obtained through the general **procedure A** with 9-BBN in THF (0.48 mL, 0.5 M, 0.24 mmol, 1.20 equiv.), 1-octene (26.9 mg, 0.24 mmol, 1.20 equiv.), halide-free vinyl lithium in THF (0.15 mL, 1.47 M, 0.22 mmol, 1.10 equiv.), a solution of Ni(acac)<sub>2</sub> (2.57 mg, 0.010 mmol, 0.050 equiv.) and (*R,R*)-

**L14** (2.88 mg, 0.012 mmol, 0.060 equiv.) in THF (0.4 mL), and 4-iodophenylboronic acid pinacol ester (66.0 mg, 0.20 mmol, 1.00 equiv.), by replacing the oxidation step with the procedure as in the synthesis of compound **28**. The crude mixture was purified by silica gel chromatography (70% DCM in hexane, stain in PMA) to afford a yellow oil (35.8 mg, 47% yield).  $^1\text{H NMR}$  (600 MHz,  $\text{CDCl}_3$ )  $\delta$  7.76 (d,  $J = 7.4$  Hz, 2H), 7.18 (d,  $J = 7.4$  Hz, 2H), 2.83 (dd,  $J = 13.7, 5.7$  Hz, 1H), 2.59 (dd,  $J = 13.7, 8.9$  Hz, 1H), 2.26 (dd,  $J = 16.8, 5.3$  Hz, 1H), 2.18 (dd,  $J = 16.8, 5.5$  Hz, 1H), 2.01 – 1.94 (m, 1H), 1.53 – 1.19 (m, 26H), 0.89 (t,  $J = 6.9$  Hz, 3H).  $^{13}\text{C NMR}$  (151 MHz,  $\text{CDCl}_3$ )  $\delta$  142.54, 135.24, 128.61, 118.64, 83.90, 40.13, 37.34, 33.52, 31.96, 29.67, 29.58, 29.36, 26.89, 24.99, 22.78, 21.14, 14.23. **11B NMR** (160 MHz,  $\text{CDCl}_3$ ) 30.6. **IR** (neat)  $\nu_{\text{max}}$  2977.06 (w), 2924.63 (m), 2854.60 (w), 2245.59 (w), 1611.72 (m), 1518.02 (w), 1465.45 (w), 1398.25 (m), 1358.18 (s), 1321.23 (m), 1271.48 (m), 1214.01 (w), 1143.48 (s), 1089.36 (s), 1021.79 (m), 962.54 (m), 859.14 (m), 829.74 (w), 736.36 (w), 659.62 (s)  $\text{cm}^{-1}$ . **HRMS** (DART) for  $\text{C}_{24}\text{H}_{42}\text{N}_2\text{O}_2\text{B}$   $[\text{M}+\text{NH}_4]^+$ : Calc'd: 401.3339, found: 401.3335.  $[\alpha]_{\text{D}}^{20} = -13.998$  ( $c = 1.54$ ,  $\text{CHCl}_3$ ,  $l = 50$  mm).

### Analysis of Stereochemistry:

Racemic compound was prepared through to same reaction sequence with 2,2'-bipy (6 mol%) as the ligand. Absolute stereochemistry was assigned by analogy (see product **34, 19**).

Chiral SFC (Chiracel AD-H, 3 % IPA, 3 mL/min, 100 bar, 35 °C, 210-289 nm) – analysis of (R)-3-(4-(4,4,5,5-tetramethyl-1,3,2-dioxaborolan-2-yl)benzyl)undecanenitrile.

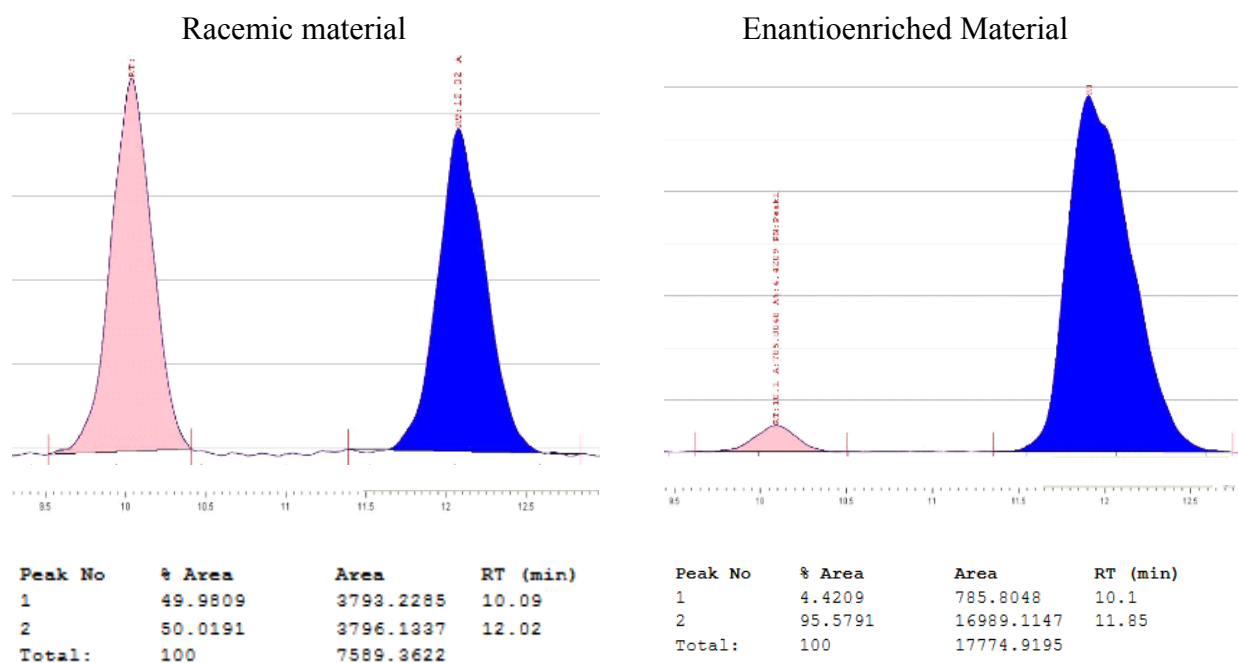

## Mono Oxidation

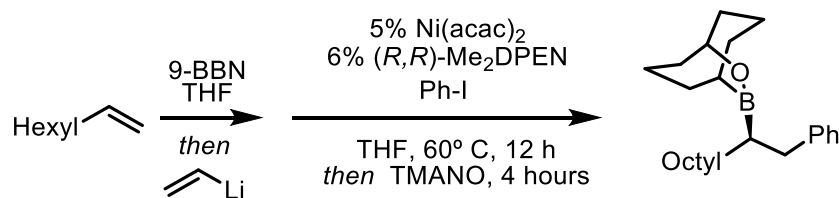**(R)-10-(1-phenyldecan-2-yl)-9-oxa-10-borabicyclo[3.3.2]decane (29)**

The title compound was prepared from enantiomerically enriched 9-BBN products obtained through the general **procedure A** with modification, using 9-BBN in THF (0.48 mL, 0.5 M, 0.24 mmol, 1.20 equiv.), 1-octene (26.9 mg, 0.24 mmol, 1.20 equiv.), halide-free vinyl lithium in THF (0.15 mL, 1.47 M, 0.22 mmol, 1.10 equiv.), a solution of Ni(acac)<sub>2</sub> (2.57 mg, 0.010 mmol, 0.050 equiv.) and **(R,R)-L6** (2.88 mg, 0.012 mmol, 0.060 equiv.) in THF (0.4 mL), and iodobenzene (40.8 mg, 0.20 mmol, 1.00 equiv.). After stirring overnight at 60°C, the mixture was brought back into the glovebox where anhydrous trimethylamine oxide (18.78 mg, 0.25 mmol) was added to the vial. The resulting suspension was sealed and stirred vigorously at room temperature for 4 hours. Afterwards, the mixture was filtered through celite and concentrated in vacuo. The material was purified by neutral alumina column chromatography (pentane, stain in CAM) to afford a colorless oil (58.9 mg, 83% yield). <sup>1</sup>H NMR (600 MHz, CDCl<sub>3</sub>) δ 7.27-7.11 (m, 5H), 4.60-4.49 (m, 1H), 2.69 (dd, *J* = 13.8, 7.8 Hz, 1H), 2.58 (dd, *J* = 13.8, 7.3 Hz, 1H), 1.80-1.16 (m, 27H), 0.88 (s, 3H). <sup>13</sup>C NMR (150 MHz, CDCl<sub>3</sub>) δ 143.35, 128.99, 128.08, 125.41, 73.39, 37.06, 35.59 (br), 32.11, 32.04, 31.38, 30.78, 30.24, 29.70, 29.65, 29.45, 26.57, 26.36, 24.33 (br), 22.84, 22.34, 22.09, 14.26. <sup>11</sup>B NMR (160 MHz, CDCl<sub>3</sub>) δ 53.30. IR (neat) ν<sub>max</sub> 3061.6 (w, m) 3025.0 (w, s), 2919.9 (s), 2851.8 (s), 1602.4 (w, s), 1494.6 (s), 1413.6 (m), 1364.9 (s), 1337.9 (s), 1285.6 (s), 1160.3 (s) 1020.44 (m), 870.9 (w, s), 697.9 (s), 643.4 (s) cm<sup>-1</sup>. HRMS (DART) for C<sub>24</sub>H<sub>40</sub>BO [M+H]<sup>+</sup>, Calc'd: 355.3172, found:355.3186 [α]<sub>D</sub><sup>20</sup> = 10.632 (*c* = 1.0, CHCl<sub>3</sub>, *l* = 50 mm).

## Amination

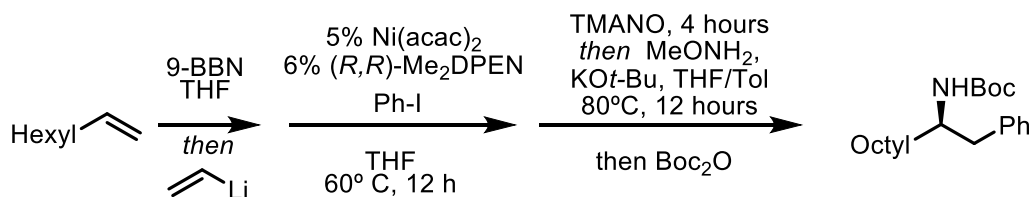**tert-butyl (R)-(1-phenyldecan-2-yl)carbamate (30)**

The title compound was prepared from enantiomerically enriched 9-BBN products obtained through the general **procedure A** with modification, using with 9-BBN in THF (0.48 mL, 0.5 M, 0.24 mmol, 1.20 equiv.), 1-octene (26.9 mg, 0.24 mmol, 1.20 equiv.), halide-free vinyl lithium in THF (0.15 mL, 1.47 M, 0.22 mmol, 1.10 equiv.), a solution of Ni(acac)<sub>2</sub> (2.57 mg, 0.010 mmol, 0.050 equiv.) and (*R,R*)-**L6** (2.88 mg, 0.012 mmol, 0.060 equiv.) in THF (0.4 mL), and iodobenzene (40.8 mg, 0.20 mmol, 1.00 equiv.). After stirring overnight at 60°C, the mixture was brought back into the glovebox where anhydrous trimethylamine oxide (18.78 mg, 0.25 mmol) was added to the vial. The resulting suspension was sealed and stirred vigorously at room temperature for 4 hours. The solvent was then removed in vacuo using a schlenk line. The crude oil was brought back into glove box and KOtBu (123.43 mg, 1.10 mmol, 5.50 equiv.) was added along with .8 mL of Toluene. The reaction mixture was sealed with a septum cap and a solution of O-methylhydroxylamine (2.53 M, .474 mL, 1.20 mmol, 6.00 equiv.) in THF was added to the vial at room temperature.

The reaction was stirred at 80°C overnight. Afterwards the mixture was cooled down to room temperature and a solution of di-tert-butyl-dicarbonate in THF (1M solution, 6.5 equiv. 1.3 mL) was added. After having stirred at rt for 4 hours, 1 mL of H<sub>2</sub>O was added and the water layer was extracted 4 times with EtOAc, dried over MgSO<sub>4</sub> and concentrated in vacuo. The product was Isolated by silica gel chromatography (2% EtOAc in pentane, ninhydrin stain) to afford a colorless oil (39.4 mg, 59% i. y.). <sup>1</sup>H NMR (500 MHz, CDCl<sub>3</sub>) δ 7.30-7.14 (m, 5H), 4.28 (br s, 1H), 3.80 (br s, 1H), 2.75 (br s, 2H), 1.50-1.19 (m, 23H), 0.87 (t, *J* = 6.9 Hz, 3H). <sup>13</sup>C NMR (150 MHz, CD<sub>3</sub>CN) δ 155.60, 138.51, 129.65, 128.37, 126.31, 79.04, 77.41, 77.16, 76.91, 51.69, 41.51, 34.35, 31.98, 29.65, 29.59, 29.36, 28.53, 26.12, 22.78, 14.22. IR (neat) ν<sub>max</sub> 3368.23 (br, w), 2956.23 (m), 2949.89 (s), 2854.58 (m), 1810.82 (w), 1699.86 (s), 1520.70 (m), 1496.61 (m), 1454.96 (m), 1390.24 (m), 1365.57 (m), 1248.73 (m), 1170.91 (s), 1118.82 (m), 1069.15 (m), 740.32 (w), 699.79 (m) cm<sup>-1</sup>. HRMS (DART) for C<sub>21</sub>H<sub>36</sub>NO<sub>2</sub> [M+H]<sup>+</sup>: Calc'd: 334.2746, found: 334.276. [α]<sub>D</sub><sup>20</sup> = +6.50 (*c* = 0.84, CHCl<sub>3</sub>, *l* = 50 mm).



**Analysis of Stereochemistry:**

Racemic compound was prepared by employing the same reaction sequence with 2,2'-bipy (6 mol%) as the ligands. Absolute stereochemistry was assigned by analogy (see product **34**, **19**).

Chiral SFC (Chiracel OD-H, 1 % IPA, 3 mL/min, 100 bar, 35 °C, 210-289 nm) – analysis of *tert*-butyl (*R*)-(1-phenyldecan-2-yl)carbamate.

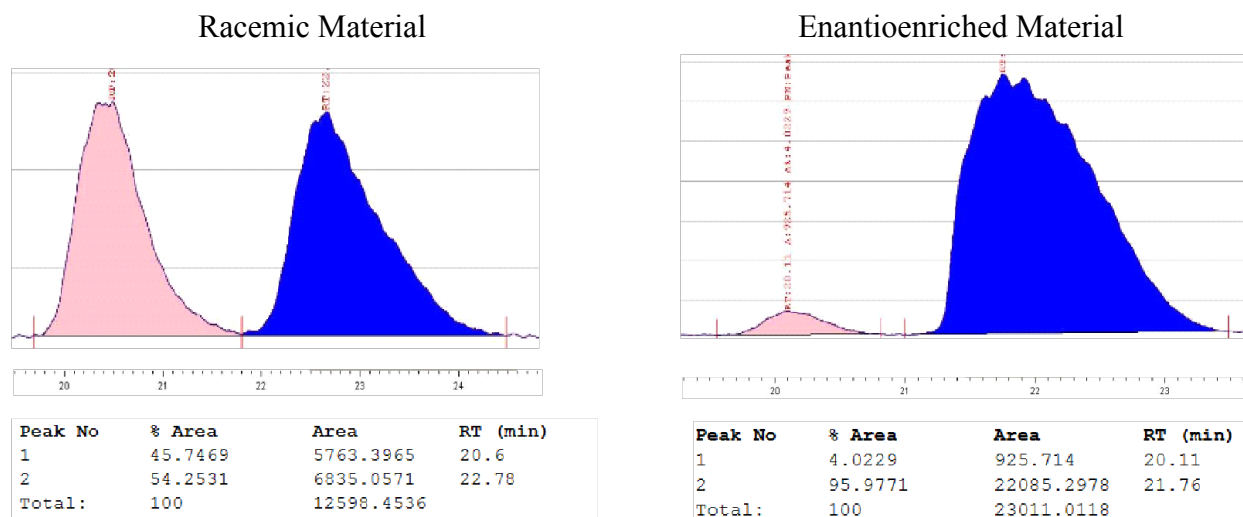**Olefination**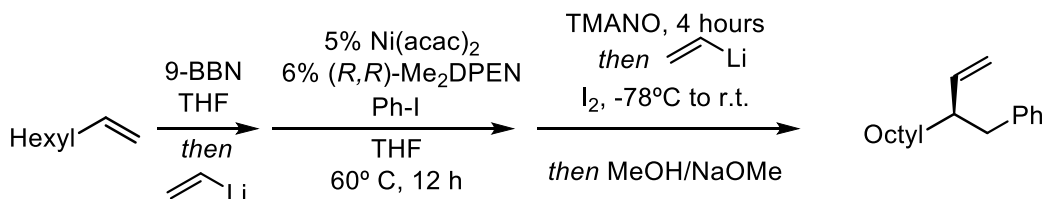**(*R*)-(2-vinyldecyl)benzene (31)**

The title compound was prepared from enantiomerically enriched 9-BBN products obtained through the general **procedure A** with modification, using 9-BBN in THF (0.48 mL, 0.5 M, 0.24 mmol, 1.20 equiv.), 1-octene (26.9 mg, 0.24 mmol, 1.20 equiv.), halide-free vinyl lithium in THF (0.15 mL, 1.47 M, 0.22 mmol, 1.10 equiv.), a solution of Ni(acac)<sub>2</sub> (2.57 mg, 0.010 mmol, 0.050 equiv.) and (*R,R*)-**L6** (2.88 mg, 0.012 mmol, 0.060 equiv.) in THF (0.4 mL), and iodobenzene (40.8 mg, 0.20 mmol, 1.00 equiv.). After stirring overnight at 60°C, the mixture was brought back into the glovebox where anhydrous trimethylamine oxide (18.78 mg, 0.25 mmol) was added to the vial. The resulting suspension was sealed and stirred vigorously at room temperature for 4 hours.

The mixture was cooled to  $-78^{\circ}\text{C}$  and vinyl lithium (1.65 M, 490  $\mu\text{L}$ , 4.00 equiv.), was added to the vial which was allowed to warm up to room temperature and stir for 10 minutes. The mixture was cooled again to  $-78^{\circ}\text{C}$  and Iodine (304.57 mg, 1.20 mmol, 6.00 equiv.) was added in 0.5 mL of THF. This mixture was Stirred at  $-78^{\circ}\text{C}$  for 1 hour and then allowed to warm to r.t. for 10 min. The reaction was cooled once more to  $-78^{\circ}\text{C}$ . Sodium methoxide (129.66 mg, 2.40 mmol, 133.80  $\mu\text{L}$ ) was added in 1.5 mL of MeOH. After warming to R.T. the reaction mixture was stirred for 12 hours. Finally, 1 mL of saturated sodium thiosulfate solution was added to the reaction mixture at  $0^{\circ}\text{C}$ . The water layer was extracted 4 times with Pentane, dried over  $\text{MgSO}_4$  and concentrated under reduced pressure. The crude product was purified by silica gel chromatography (pentane, stain in CAM) to afford a colorless oil (40.2 mg, 82% yield).  $^1\text{H NMR}$  (600 MHz,  $\text{CDCl}_3$ )  $\delta$  7.29-7.07 (m, 5H), 5.64-5.55 (m, 1H), 3.92 (dd,  $J = 10.3, 1.8$  Hz, 1H), 4.89 (ddd,  $J = 17.1, 2.0, 0.9$  Hz, 1H), 2.65 (dd,  $J = 13.5, 6.6$  Hz, 1H), 2.59 (dd,  $J = 13.5, 7.6$  Hz, 1H), 2.28 (m, 1H), 1.44 – 1.12 (m, 14H), 0.88 (s, 3H).  $^{13}\text{C NMR}$  (126 MHz,  $\text{CDCl}_3$ )  $\delta$  142.69, 140.87, 129.39, 128.12, 125.79, 114.49, 45.76, 41.96, 34.29, 32.01, 29.81, 29.70, 29.43, 27.27, 22.79, 14.23. **IR** (neat)  $\nu_{\text{max}}$  3065.1 (w, m), 3027 (s), 2955.4 (s), 2924.3 (s), 2854.1 (s), 1639.0 (w, s), 1495.2 (s), 1495.3 (w), 1378.1 (w, s), 1030.3 (w, s), 993.1 (s), 745.2 (w), 698.3 (s). **HRMS** (DART) for  $\text{C}_{18}\text{H}_{29}$   $[\text{M}+\text{H}]^+$ : Calc'd: 245.2269, found: 245.2261.  $[\alpha]_{\text{D}}^{20} = 4.840$  ( $c = 1.0, \text{CHCl}_3, l = 50$  mm).

### Analysis of Stereochemistry:

In order to obtain separation conditions on the SFC, the title compound was submitted to a hydroboration oxidation sequence and the resulting primary alcohol was compared against the racemic product obtained through the same reaction with 2,2'-bipyridine.

Chiral SFC (Chiracel OJ-H, 2 % IPA, 3 mL/min, 100 bar,  $35^{\circ}\text{C}$ , 210-289 nm) – analysis of tert-butyl (R)-3-benzylundecan-1-ol.

Racemic Material

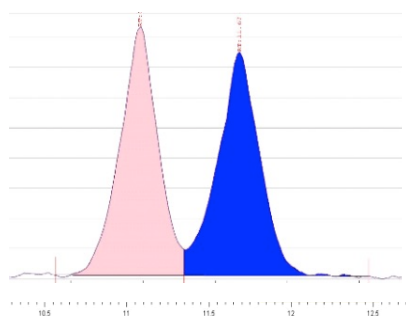

| Peak No | % Area  | Area      | RT (min) |
|---------|---------|-----------|----------|
| 1       | 50.0039 | 3057.1549 | 10.98    |
| 2       | 49.9961 | 3056.672  | 11.67    |
| Total:  | 100     | 6113.8269 |          |

Enantioenriched Material

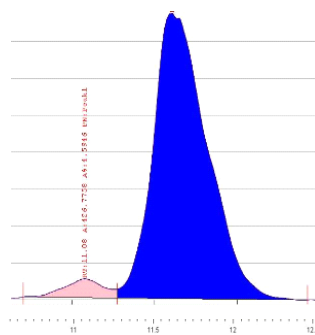

| Peak No | % Area  | Area      | RT (min) |
|---------|---------|-----------|----------|
| 1       | 4.5946  | 426.7758  | 11.08    |
| 2       | 95.4054 | 8861.79   | 11.61    |
| Total:  | 100     | 9288.5658 |          |

## VI. Deuterium-labeling Experiment

Procedure for the Preparation of *Trans*-deuterium-labeled Vinyl Lithium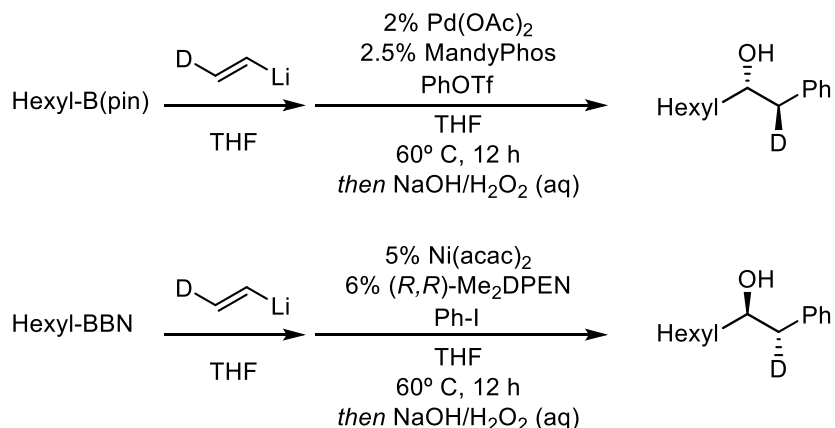

The *trans*-deuterium labeled vinyl lithium was prepared as described in previous reports.<sup>16</sup>

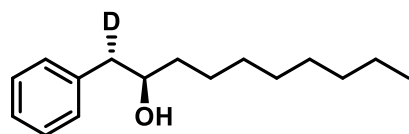

**(1*S*,2*R*)-1-phenyldecan-1-*d*-2-ol (34).** The cross-coupling reaction was performed according to the general **procedure A** with 9-BBN in THF (0.48 mL, 0.5 M, 0.24 mmol, 1.20 equiv.), 1-hexene (20.2 mg, 0.24 mmol, 1.20 equiv.), deuterium labeled vinyl lithium in THF (0.14 mL, 1.57 M, 0.22 mmol, 1.10 equiv.), a solution of Ni(acac)<sub>2</sub> (2.57 mg, 0.010 mmol, 0.050 equiv.) and **(*R,R*)-L6** (2.88 mg, 0.012 mmol, 0.060 equiv.) in THF (0.4 mL), iodobenzene (40.8 mg, 0.20 mmol, 1.00 equiv.). The crude material was purified by column chromatography (40% DCM in pentane, stain in CAM) to afford a white solid (26 mg, 63% yield). **<sup>1</sup>H NMR** (600 MHz, CDCl<sub>3</sub>) δ 7.68 – 6.84 (m, 5H), 4.00 – 3.69 (m, 1H), 2.63 (d, *J* = 8.1 Hz, 1H), 1.61 – 1.18 (m, 11H), 0.89 (t, *J* = 6.8 Hz, 3H). **<sup>13</sup>C NMR** (126 MHz, CDCl<sub>3</sub>) δ 138.60, 129.39, 128.52, 126.40, 72.64, 43.70, 36.84, 31.82, 29.30, 25.70, 22.59, 14.05. **IR** (neat)  $\nu_{\text{max}}$  cm<sup>-1</sup> 3363.48 (br s), 3026.64 (s), 2954.49 (s), 2925.27 (s), 2855.42 (s), 1495.09 (s), 1495.09 (s), 1377.75 (s), 1282.19 (m), 1076.80 (m), 737.64 (m), 699.12 (s). **HRMS** (DART) for C<sub>14</sub>H<sub>20</sub>D [M+H-H<sub>2</sub>O]<sup>+</sup>: Calc'd: 190.1706, found: 190.1702. [ $\alpha$ ]<sub>D</sub><sup>20</sup> -3.66 (*c* = 3.92, CHCl<sub>3</sub>, *l* = 50 mm).

In order to determine the relative stereochemistry of the product, a parallel reaction with known stereochemical outcome was carried out according to our previously published procedure.<sup>16</sup>

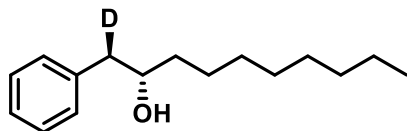**(1R,2S)-1-phenyldecan-1-d-2-ol (S-34).**

To an oven-dried 2-dram vial equipped with a magnetic stir bar in an Ar-filled glovebox was added alkyl/aryl boronic ester (63.6 mg, 0.30 mmol, 1.0 equiv.) and diethyl ether (0.3 mL), sealed with a septum cap, and removed from the glovebox. The reaction vial was cooled to 0°C, and a deuterium labeled vinylolithium solution (.20 mL, 1.57 M, 0.30 mmol, 1.0 equiv.) was added at 0°C. The reaction vial was allowed to warm to room temperature and stirred for 30 minutes. Then, the solvent was carefully removed under reduced pressure, and the reaction vial was brought back into the glovebox. To a separate oven-dried 2-dram vial equipped with a magnetic stir bar in the glovebox was added Pd(OAc)<sub>2</sub> (1.4 mg, 0.006 mmol, 0.02 equiv.), (*S<sub>p</sub>*,*S'<sub>p</sub>*)-1,1'-Bis[bis(4-methoxy-3,5-dimethylphenyl)phosphino]-2,2'-bis[*R*]-α-(dimethylamino)benzyl]ferrocene (**MandyPhos**, 7.6 mg 0.0072 mmol, 0.024 equiv.), and THF (0.6 mL). The Pd(OAc)<sub>2</sub>/*(S<sub>p</sub>*, *S<sub>p</sub>*)-**MandyPhos** solution was allowed to stir for 20 minutes at room temperature. Then the Pd(OAc)<sub>2</sub>/*(S<sub>p</sub>*, *S<sub>p</sub>*)-**MandyPhos** solution was transferred into the reaction vial, followed by THF (0.6 mL), and aryl/vinyl triflate (0.33 mmol, 1.10 equiv.) was added. The reaction vial was sealed with a polypropylene cap, taped, and brought out of the glovebox where it was allowed to stir at 60°C for 14 hours. The resulting mixture was cooled to room temperature, filtered through a silica gel plug with diethyl ether, concentrated under reduced pressure. The reaction mixture was diluted with THF (3 mL), cooled to 0°C, 3M NaOH (2 mL) was added, followed by 30% H<sub>2</sub>O<sub>2</sub> (1.0 mL), dropwise. The reaction mixture was allowed to warm to room temperature, and was allowed to stir for 4 hours. The reaction mixture was cooled to 0°C and saturated aq. Na<sub>2</sub>S<sub>2</sub>O<sub>3</sub> (3 mL) was added dropwise. The reaction mixture was allowed to warm to room temperature and the aqueous layer was extracted with ethyl acetate (3 x 20 mL). The combined organic layers were dried over Na<sub>2</sub>SO<sub>4</sub>, filtered, and concentrated under reduced pressure. The crude mixture was purified by silica gel chromatography (40% DCM in pentane, stain in CAM) to afford a white solid (24.0 mg, 58% yield). All spectroscopic data matched those obtained from the Ni catalyzed reaction. [ $\alpha$ ]<sub>D</sub><sup>20</sup> = 10.56 (*c* = 0.76, CHCl<sub>3</sub>, *l* = 50 mm). Ni catalyzed [ $\alpha$ ]<sub>D</sub><sup>20</sup> -3.66 (*c* = 3.92, CHCl<sub>3</sub>, *l* = 50 mm).

In our previous report,<sup>16</sup> a similar deuterium labelled vinylolithium was used in palladium/Mandyphos catalyzed conjunctive cross-coupling, and it was found to generate products with anti stereochemistry between the hydroxyl group and the deuterium atom, consistent with an anti-migration of the organo lithium reagent with respect to the metal-bound alkene. Thus, by comparing the products of the two reactions (where the diastereotopic benzylic protons of the product are clearly distinguishable by <sup>1</sup>H NMR) it was determined that the Ni catalyzed conjunctive cross-coupling yielded the same diastereomer as the products obtained from Palladium catalysis.

**Analysis of Stereochemistry:**

Racemic compound was prepared through the general **procedure A** with 2,2'-bipy (6 mol%) as the ligand, and non-labeled vinyl lithium.

Chiral SFC (Chiracel OD-H, 3 % IPA, 3 mL/min, 100 bar, 35 °C, 210-289 nm) – analysis of *tert*-butyl (1*R*,2*S*)-1-phenyldecan-1-d-2-ol.

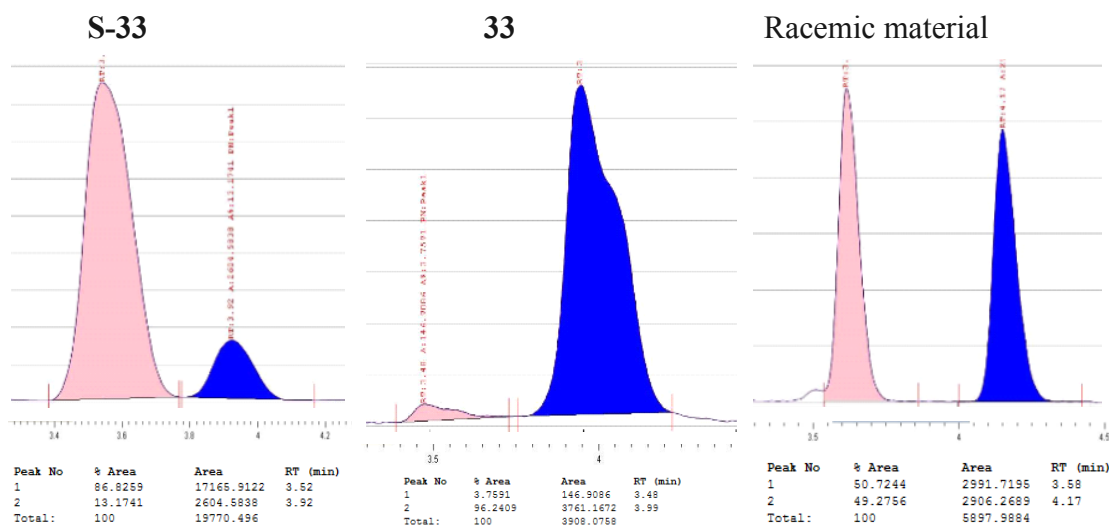**Assignment of Absolute Stereochemistry**

Comparison of the SFC traces and optical rotation of **32** and **S-32** allowed for the assignment of the absolute stereochemistry for the Ni catalyzed conjunctive cross-coupling products. This assignment was also supported by comparison of the SFC trace and optical rotation of the substrate **16** with those previously reported.<sup>16</sup>

**VII Stoichiometric experiments.**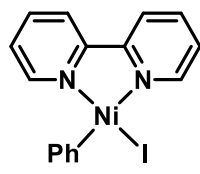**Phenyl(dipyridyl) Nickel Iodide (35)**

In an argon filled glovebox, to an oven dried scintillation vial equipped with a magneti stirbar was added Bis(cyclooctadiene)nickel(0) (82.5 mg, 0.3 mmol, 1.0 equiv.) 2,2'-bipyridine (46.9 mg, 0.3 mmol, 1.0 equiv.) and 2 mL of THF. The vial was sealed with a septum-cap and brought outside. The dark purple solution was allowed to stir for 3 hours at room temperature, after which

the solvent was carefully removed through a Schlenk line under reduced pressure. The solid was then mostly redissolved in 8 mL of pentane (the BipyNiCOD complex is slightly soluble in pentane), and iodobenzene (104.1 mg, 0.51 mmol, 1.7 equiv.) was added the vial. The solution turned cloudy and a dark red precipitate began to form. After stirring for 2 hours the suspension was brought back into the glovebox and allowed to settle. The colorless pentane solution was removed via syringe leaving behind a dark red solid which was triturated 4 times with 2 mL portions of Pentane. The vial was sealed and placed under vacuum overnight to remove any residual solvent, leaving behind the product as a red solid (54 mg, 43% yield). The solid could not be characterized by conventional methods as it was not stable enough in solution to provide clean NMR spectra.

The structure was confirmed through x-ray crystallography. Crystals were grown by vapor diffusion with pentane and 2-methyltetrahydrofuran at  $-18^{\circ}\text{C}$ . The metal complex was dissolved in anhydrous 2-methyltetrahydrofuran in a glovebox, filtered through celite.

### Stoichiometric Conjunctive Cross-Coupling Reactions.

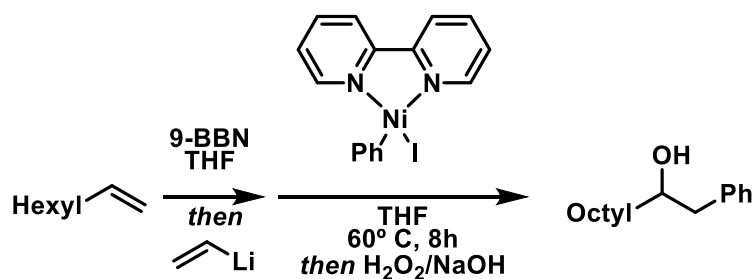

In an argon filled glovebox, in an oven-dried 2-dram vial equipped with a magnetic stirbar, 1-octene (13.5 mg, 0.105 mmol, 1.05 equiv.) was added to a solution of 9-BBN in THF (0.21 mL, 0.5 M, 0.105 mmol, 1.05 equiv.) at  $0^{\circ}\text{C}$ . The reaction mixture was allowed to warm to room temperature and stir for an additional 3 hours before being cooled back to  $0^{\circ}\text{C}$ . Vinyl lithium in THF (68  $\mu\text{L}$ , 1.47 M, 0.1 mmol, 1.00 equiv.) was added to the reaction mixture which was then warmed to room temperature and stirred for 5 minutes. Phenyl(dipyridyl)nickel iodide (**34**) (41.9 mg, 0.1 mmol, 1.0 equiv.) was added to the vial which was then sealed with a septa-cap, brought outside and stirred for 8 hours at  $60^{\circ}\text{C}$ . The reaction mixture was then cooled to  $0^{\circ}\text{C}$ , and 30% H<sub>2</sub>O<sub>2</sub> (0.25 mL) were added along with 3 M NaOH (0.25 mL). The reaction mixture was allowed to warm up to room temperature and stirred for 3 hours, aq. Na<sub>2</sub>S<sub>2</sub>O<sub>3</sub> (0.5 mL) was then added to quench the reaction mixture. The aqueous phase was extracted with Et<sub>2</sub>O (2 x 2 mL), followed by EtOAc (2 x 2 mL). The combined organic layer was dried over MgSO<sub>4</sub>, filtered, concentrated under reduced pressure, and subsequently purified via silica gel column chromatography to provide **1** as a colorless oil (10.5 mg, 45% yield).

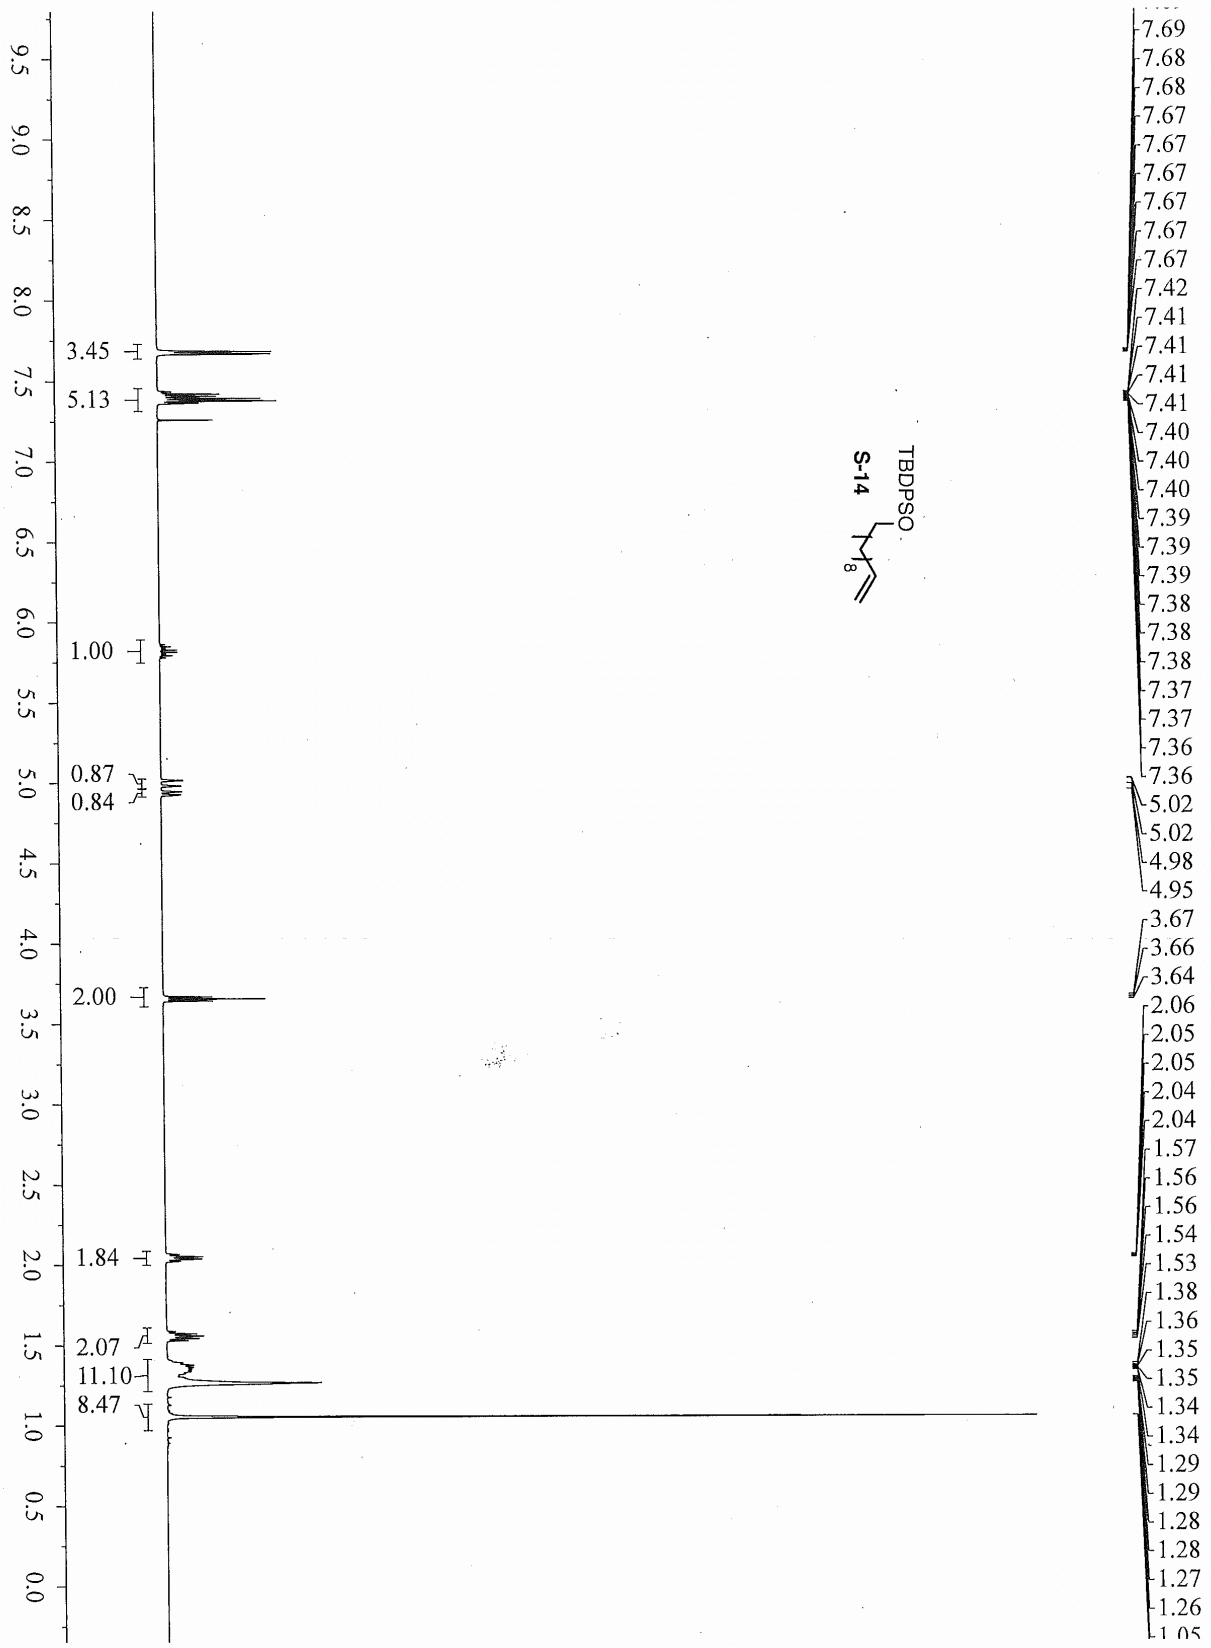



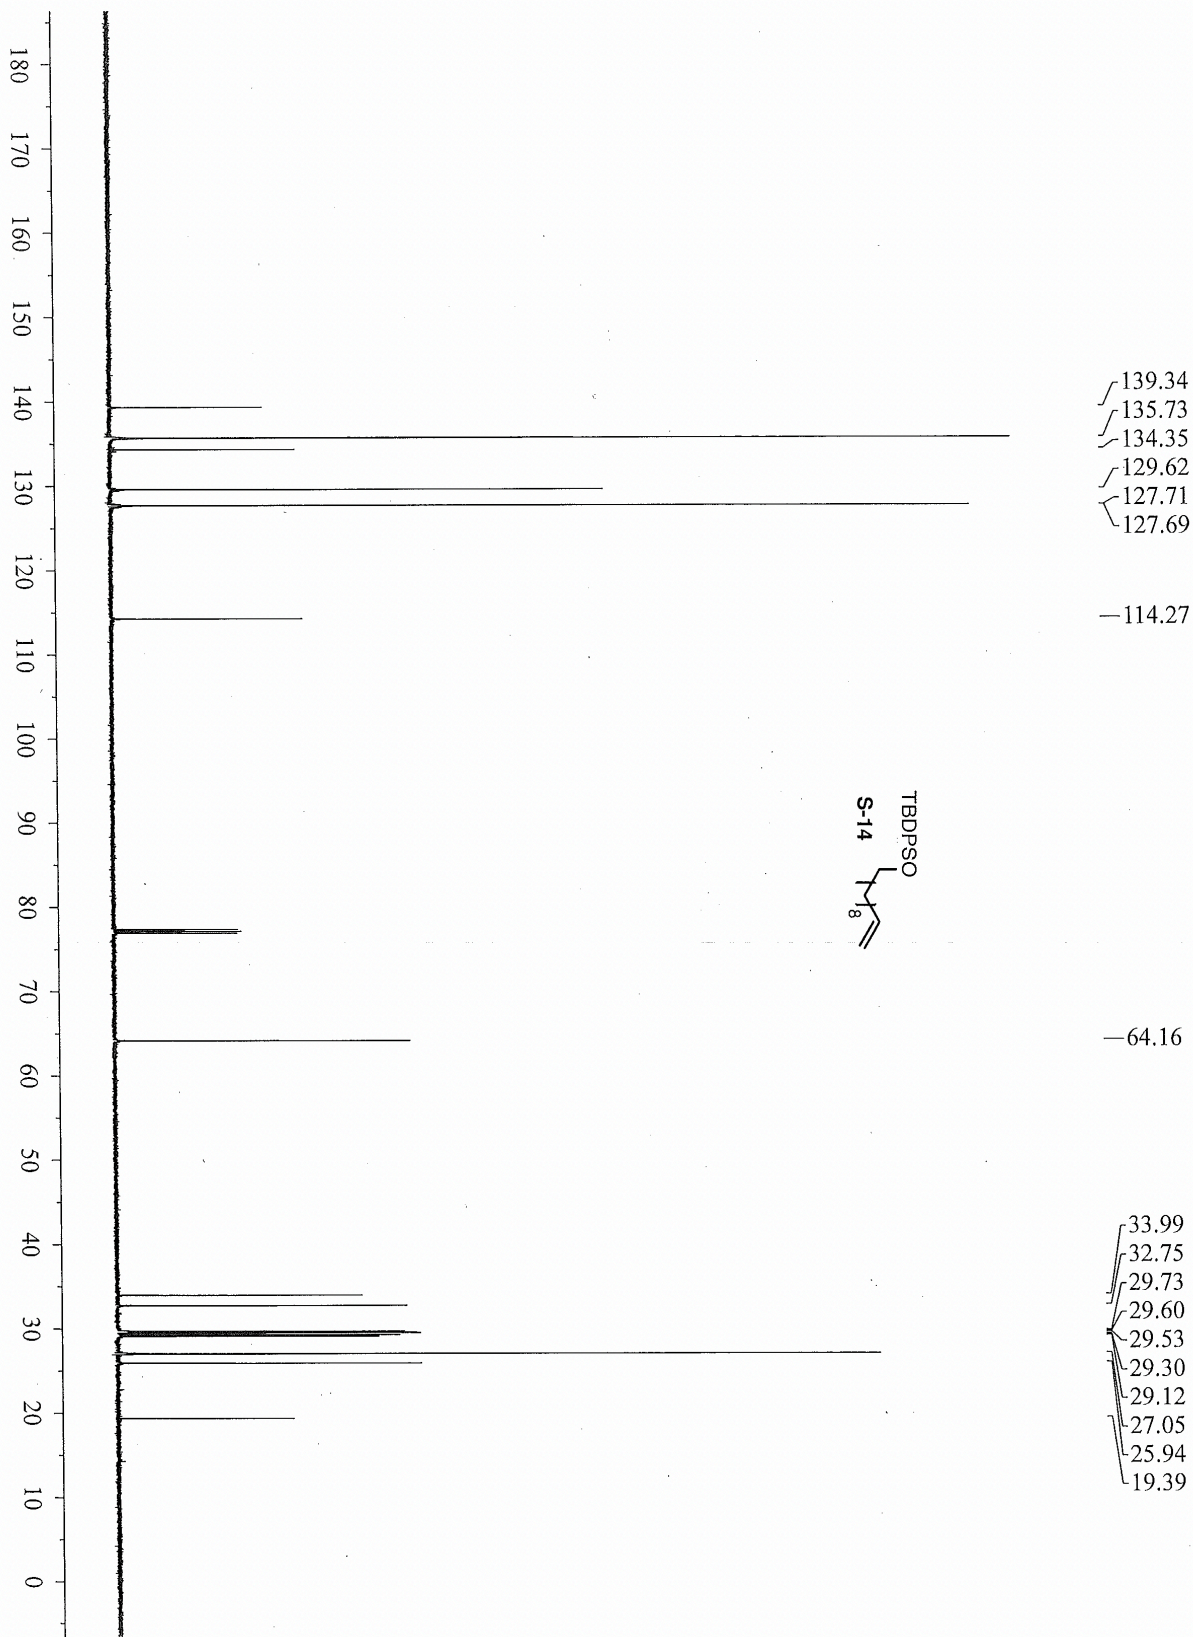



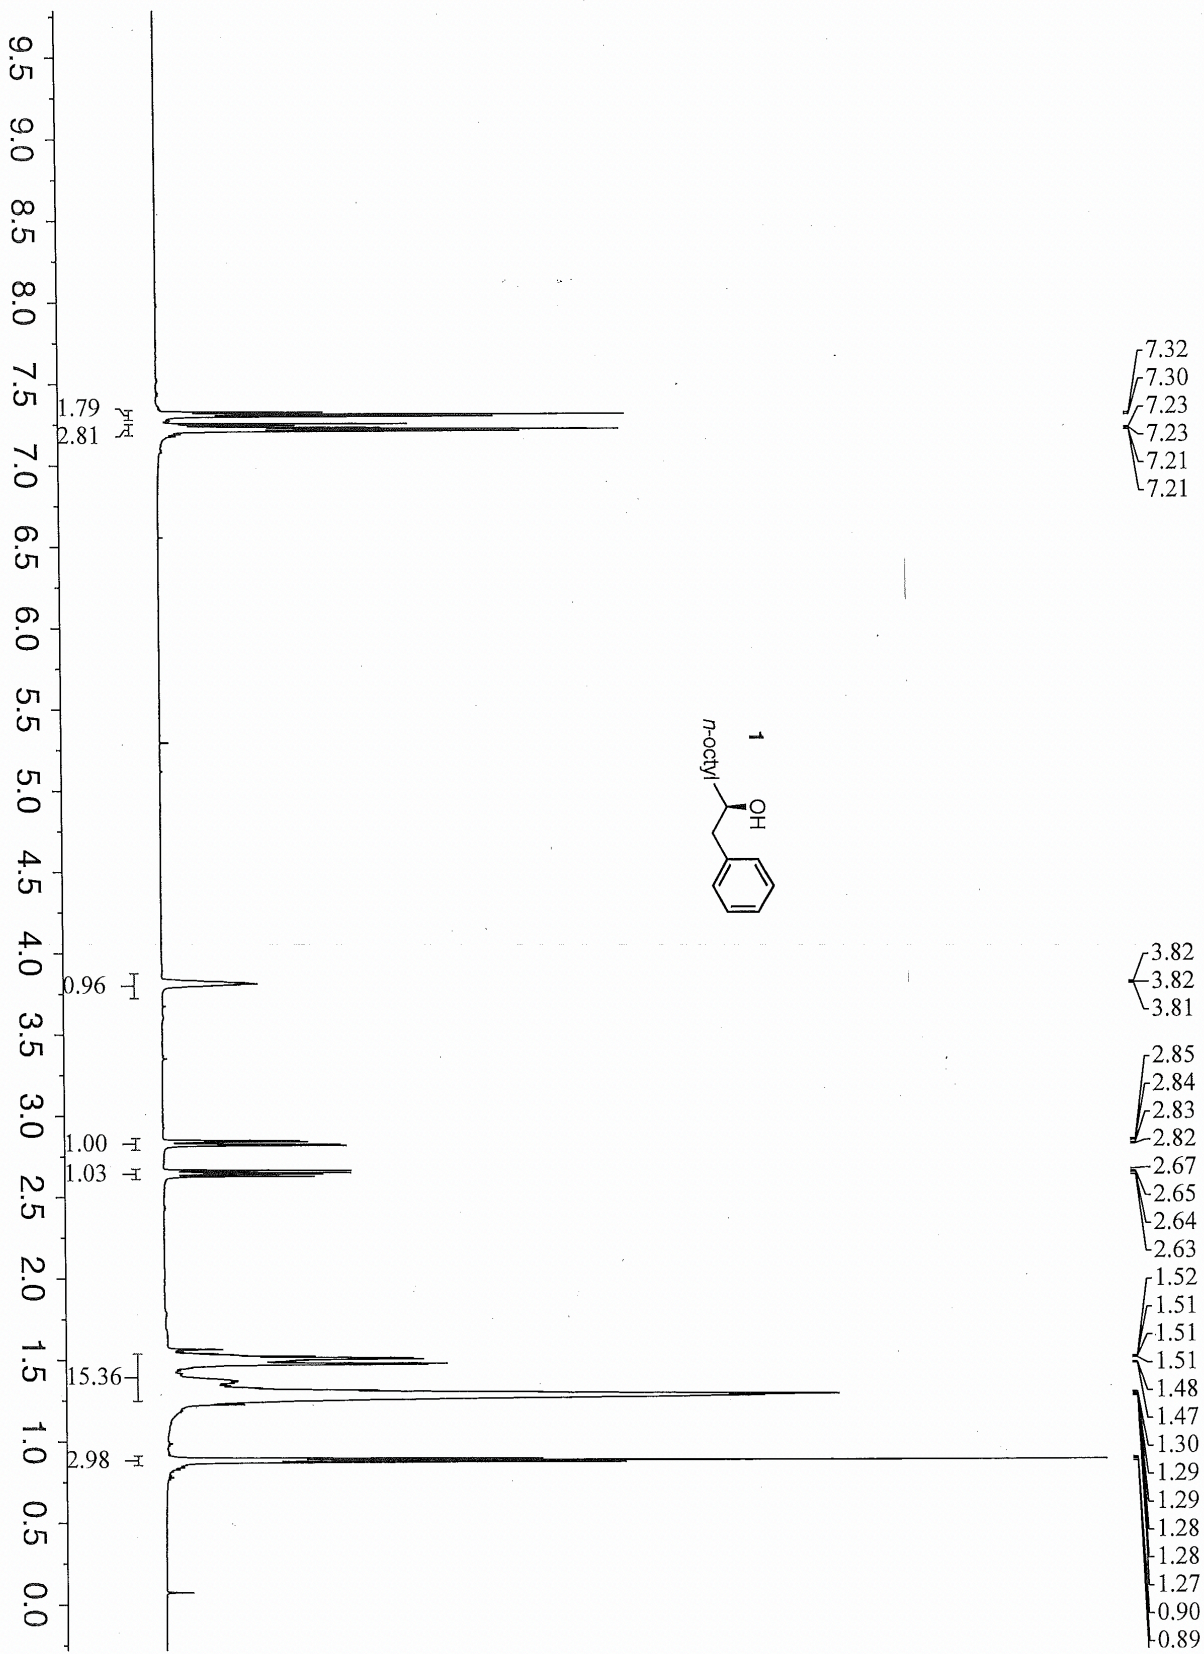

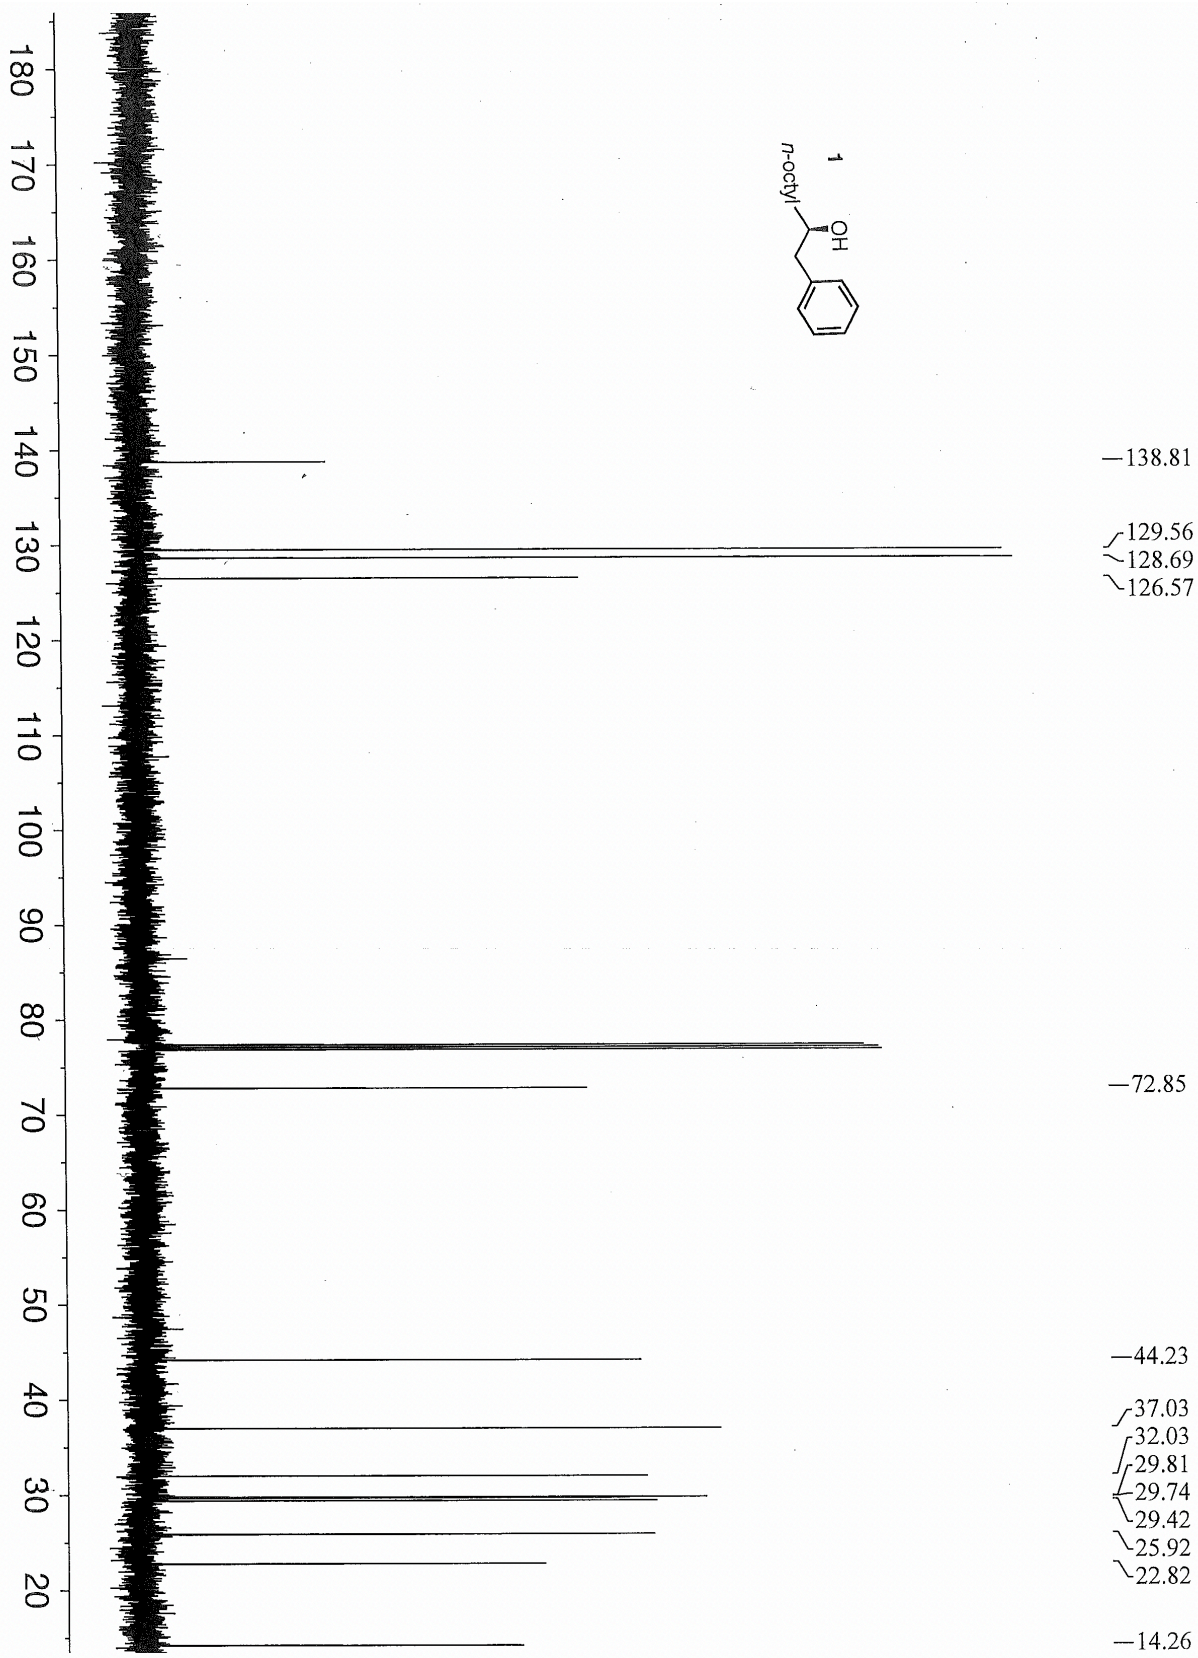

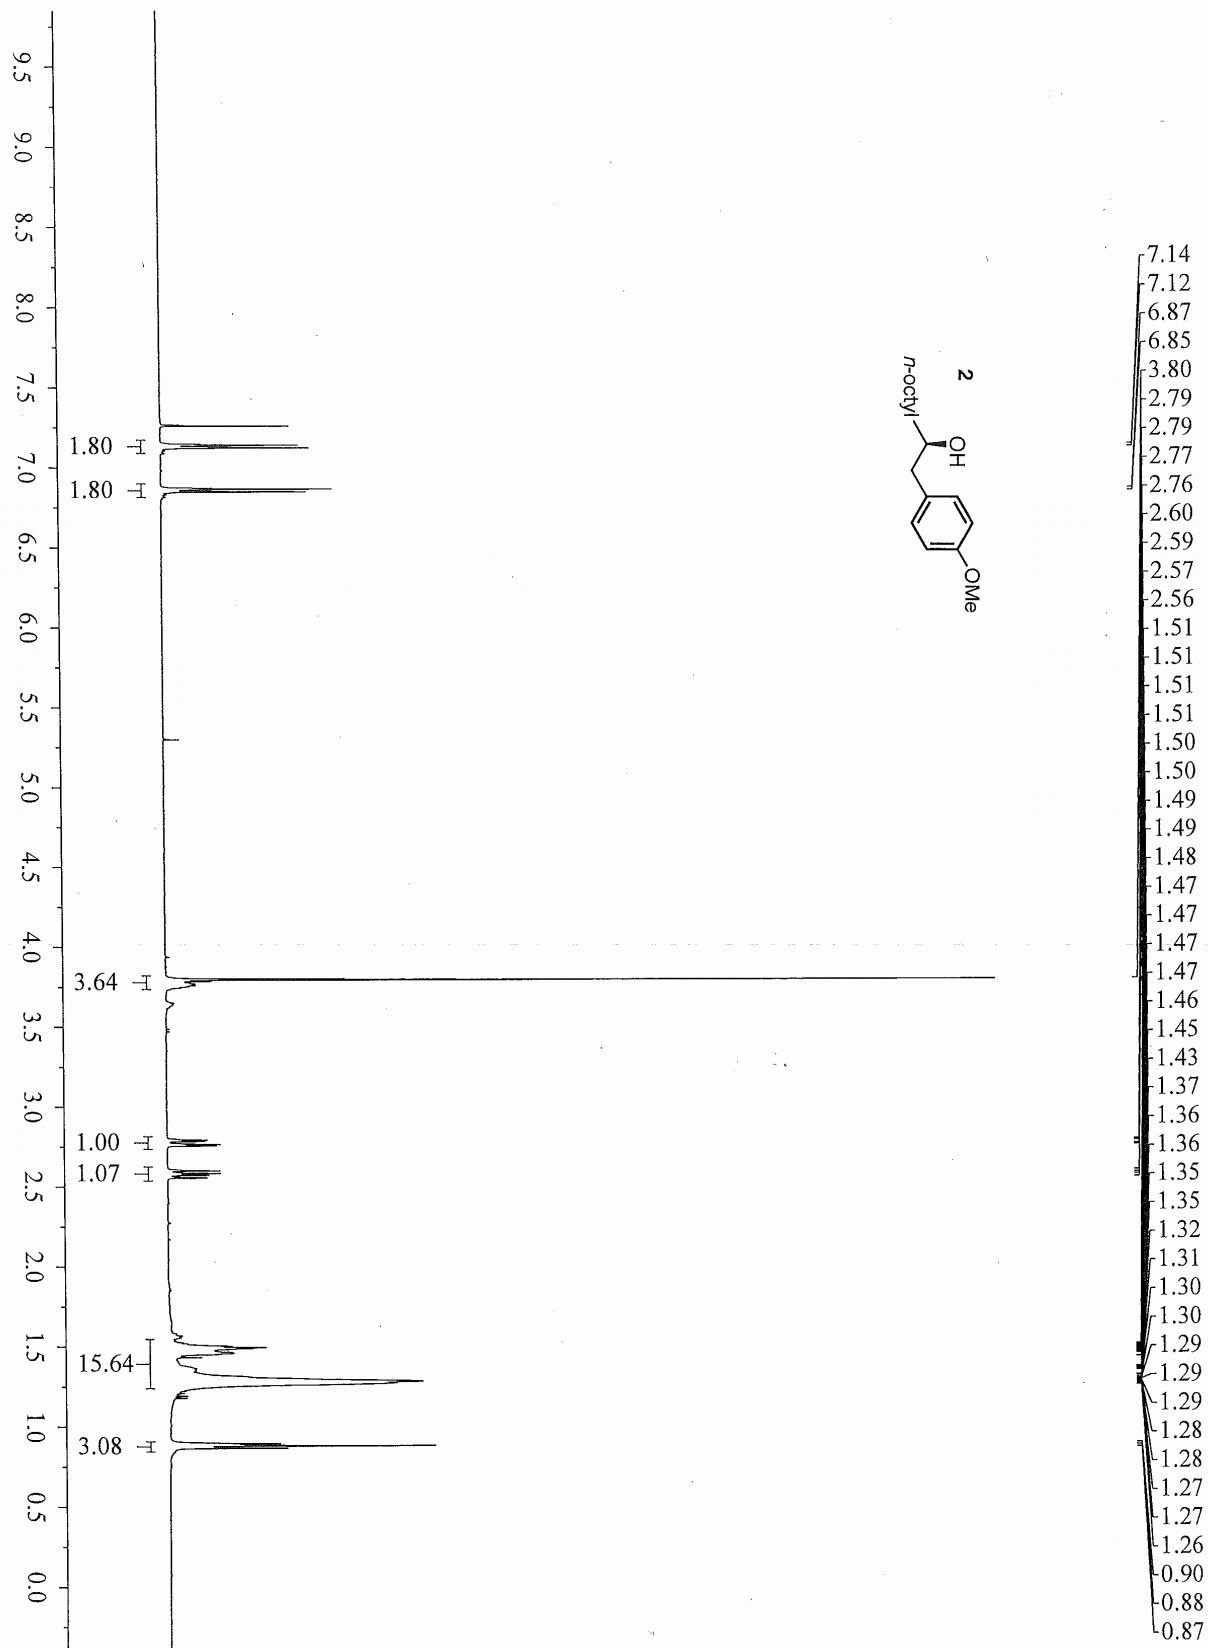

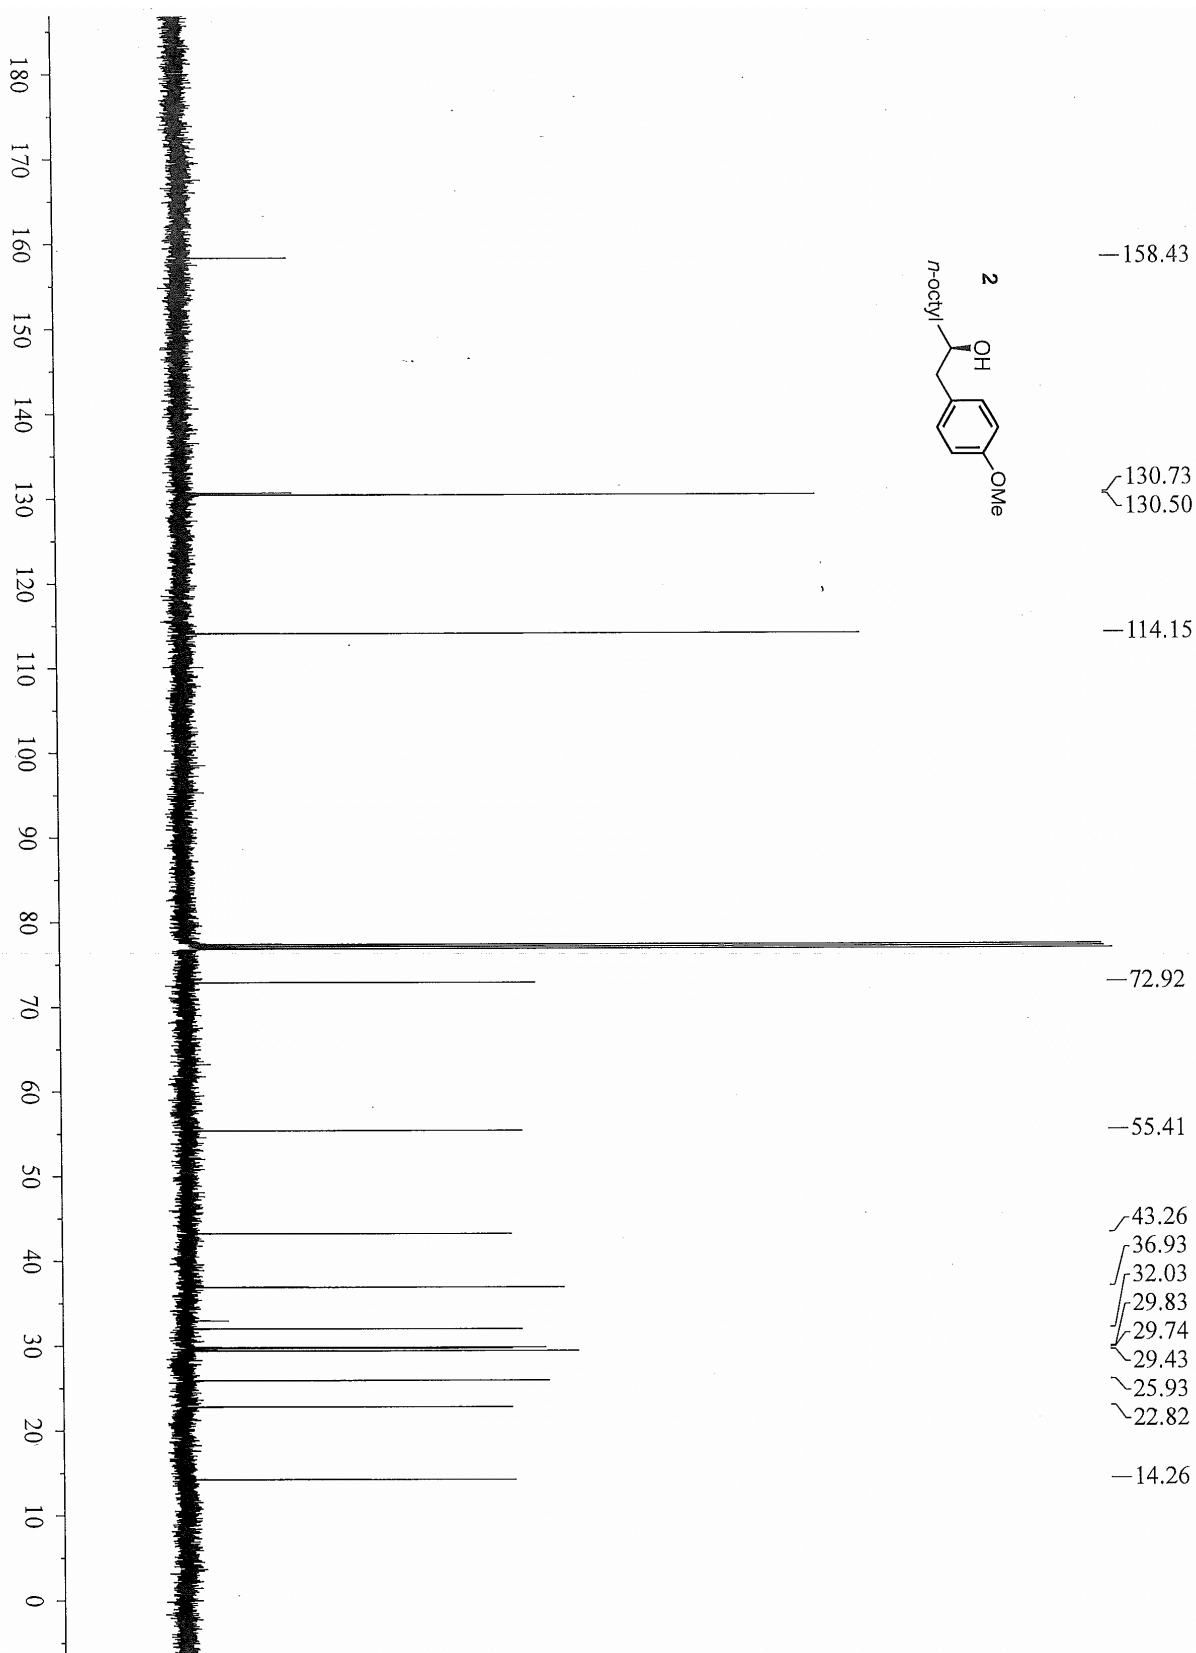



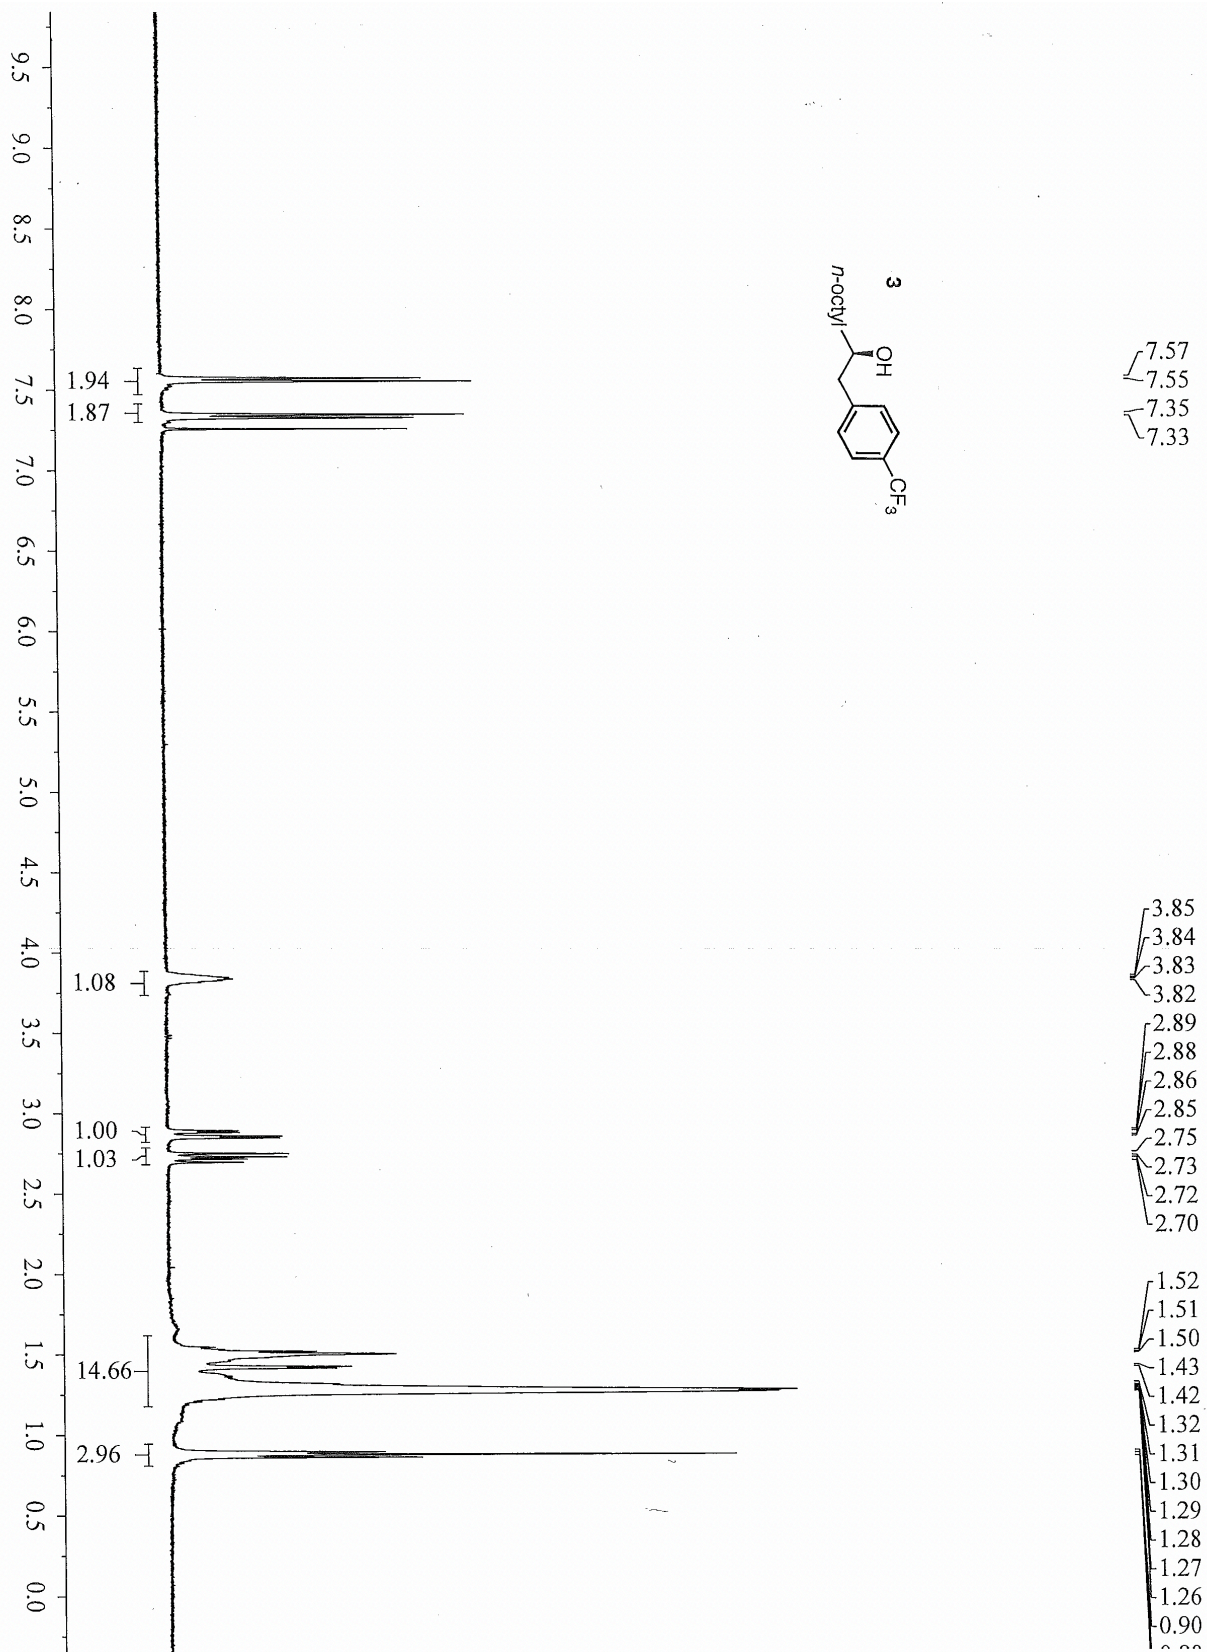

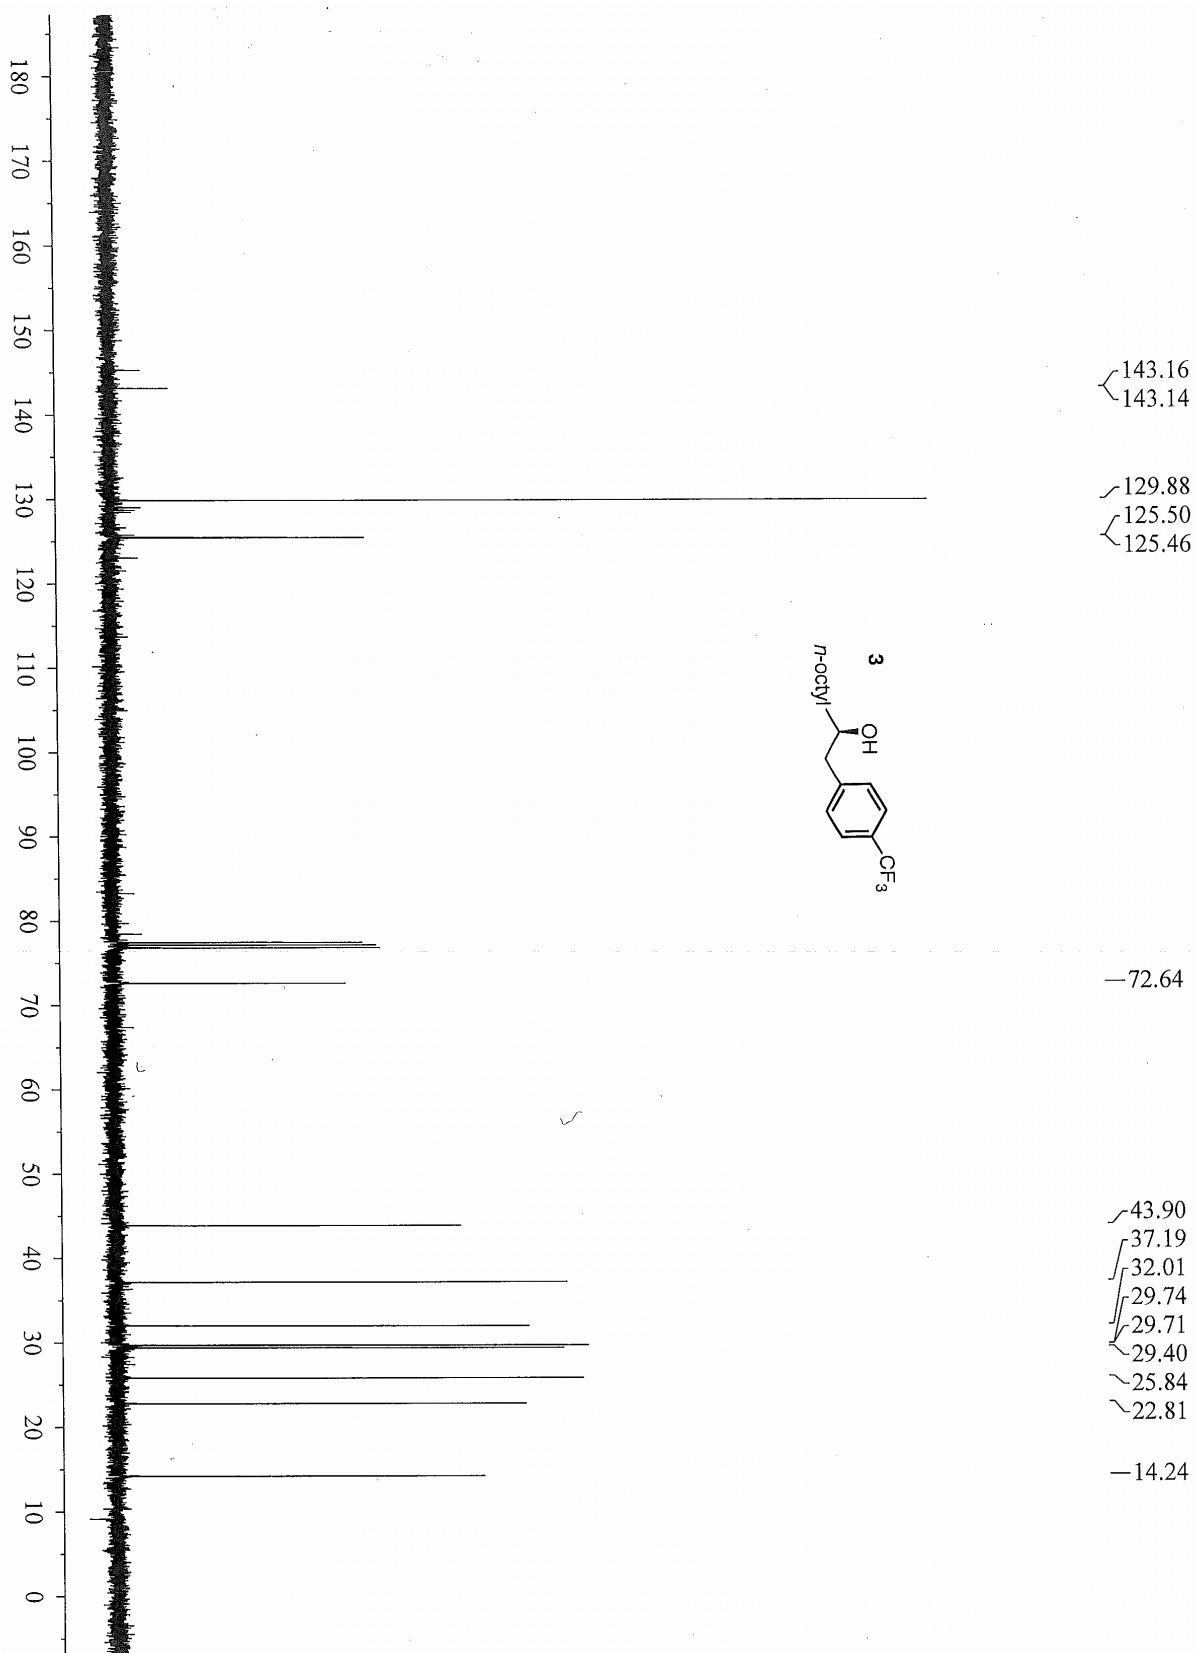

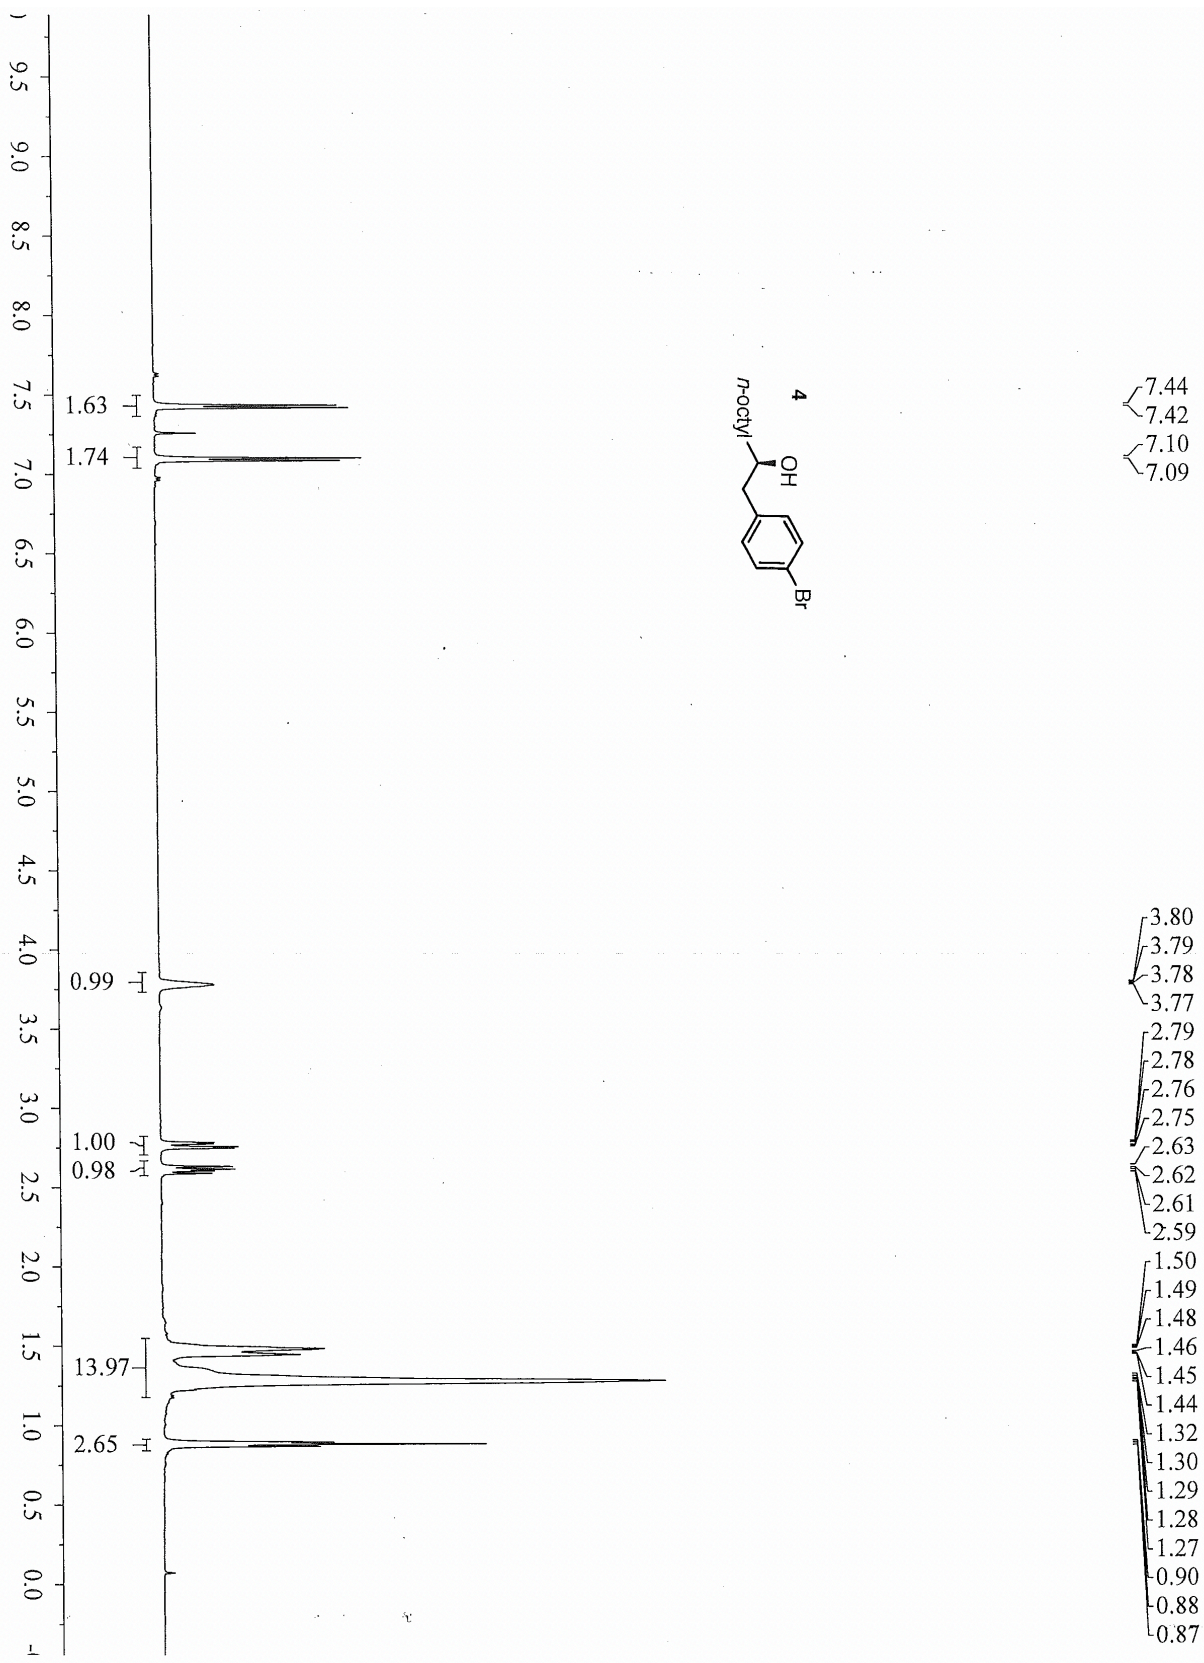

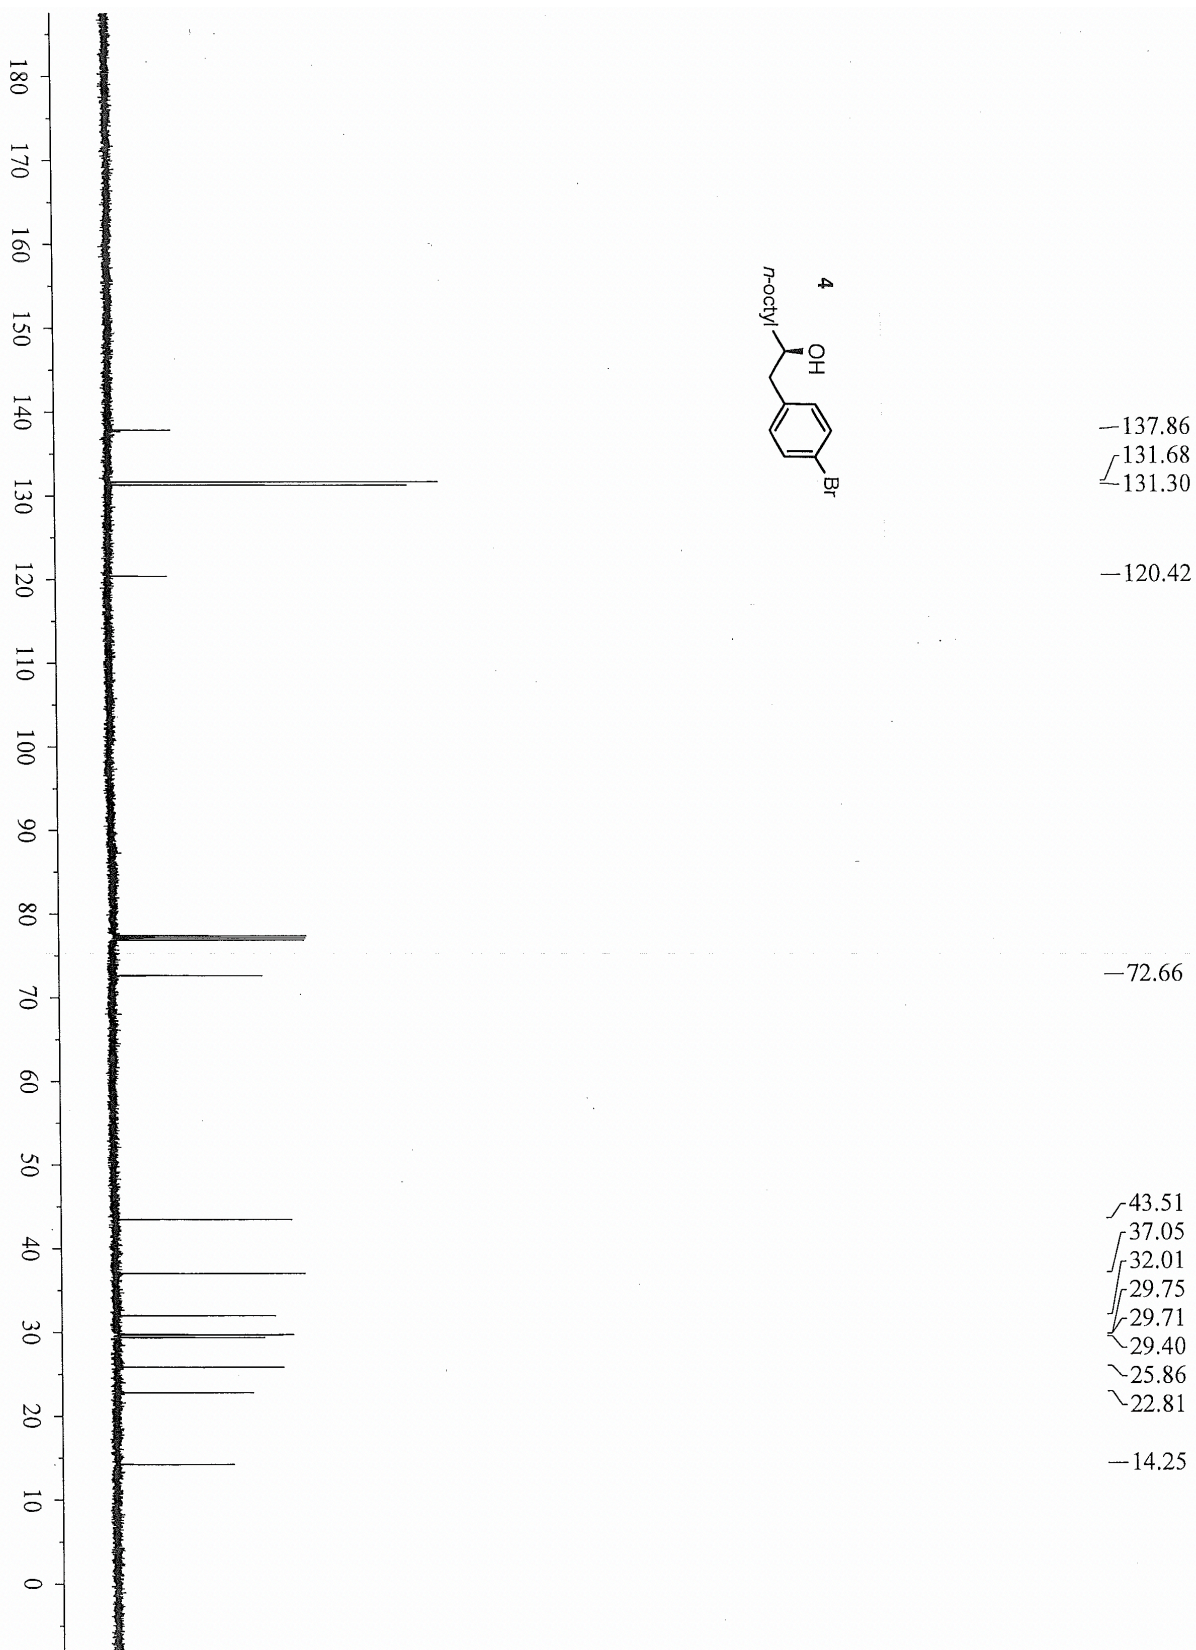



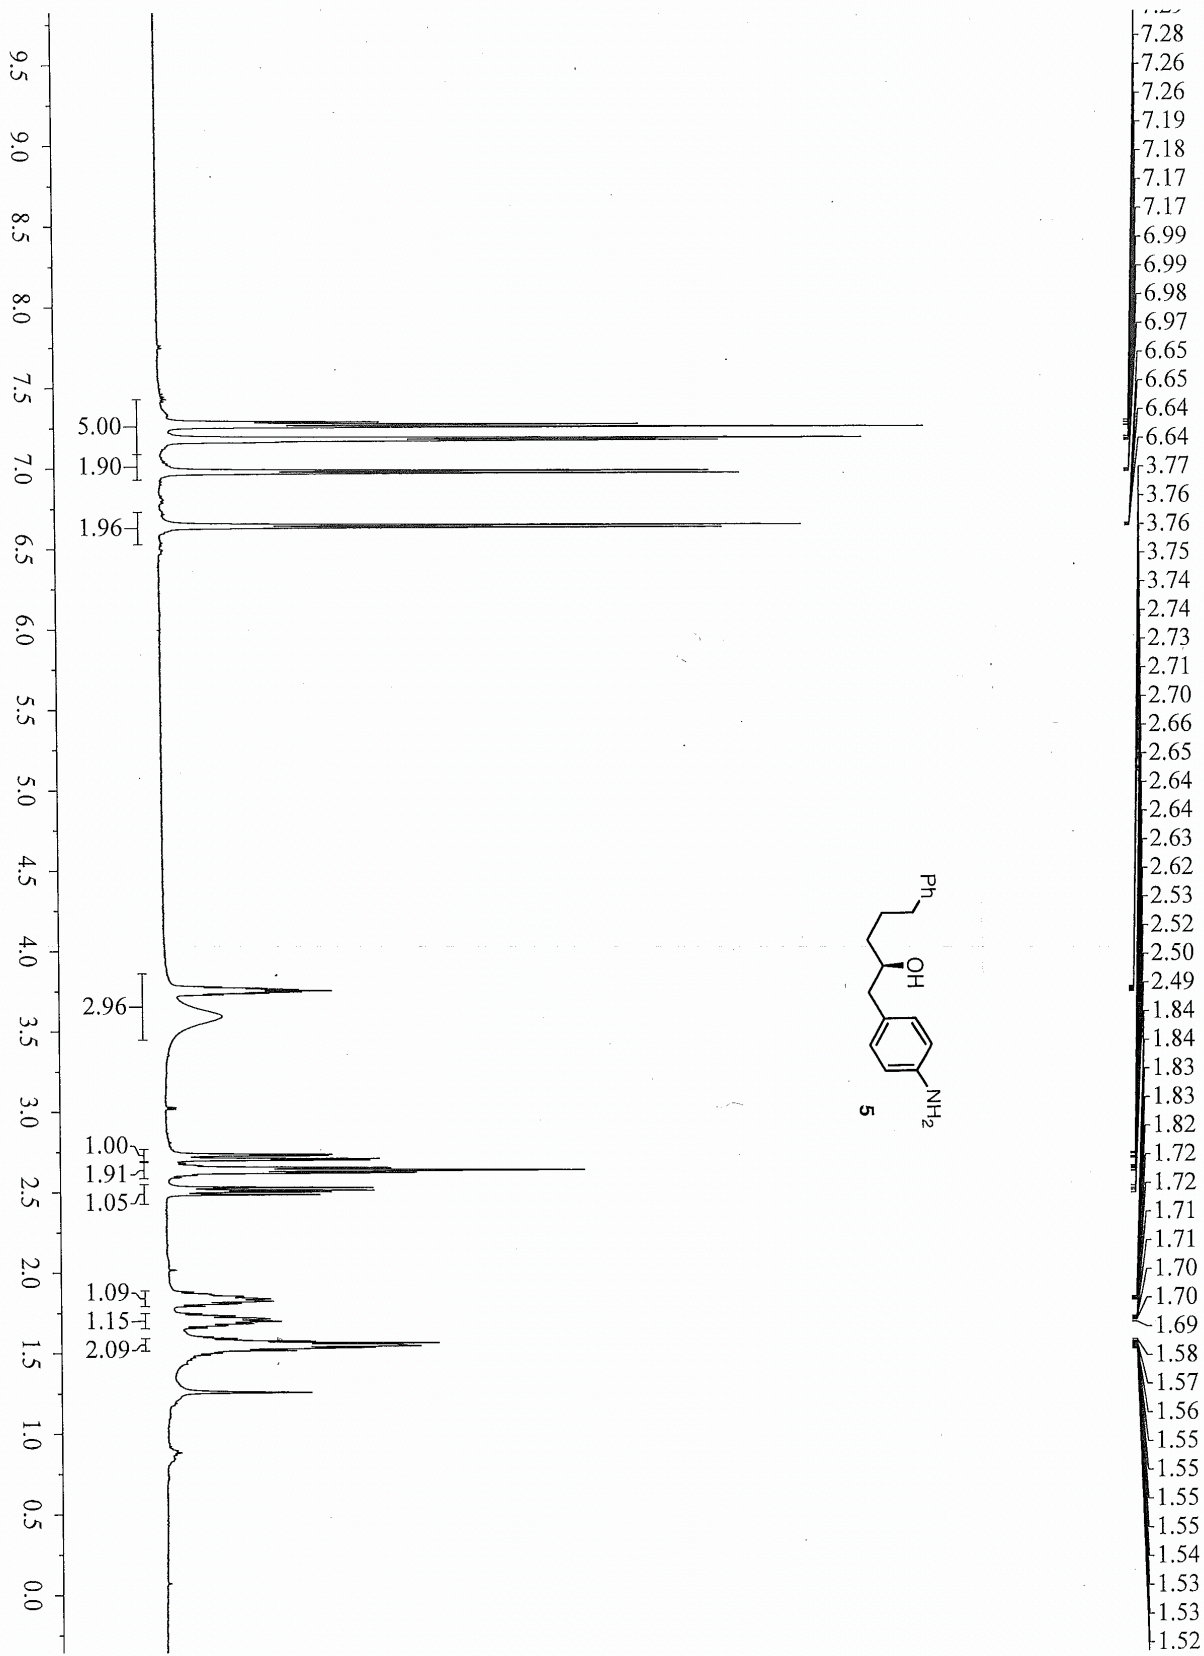

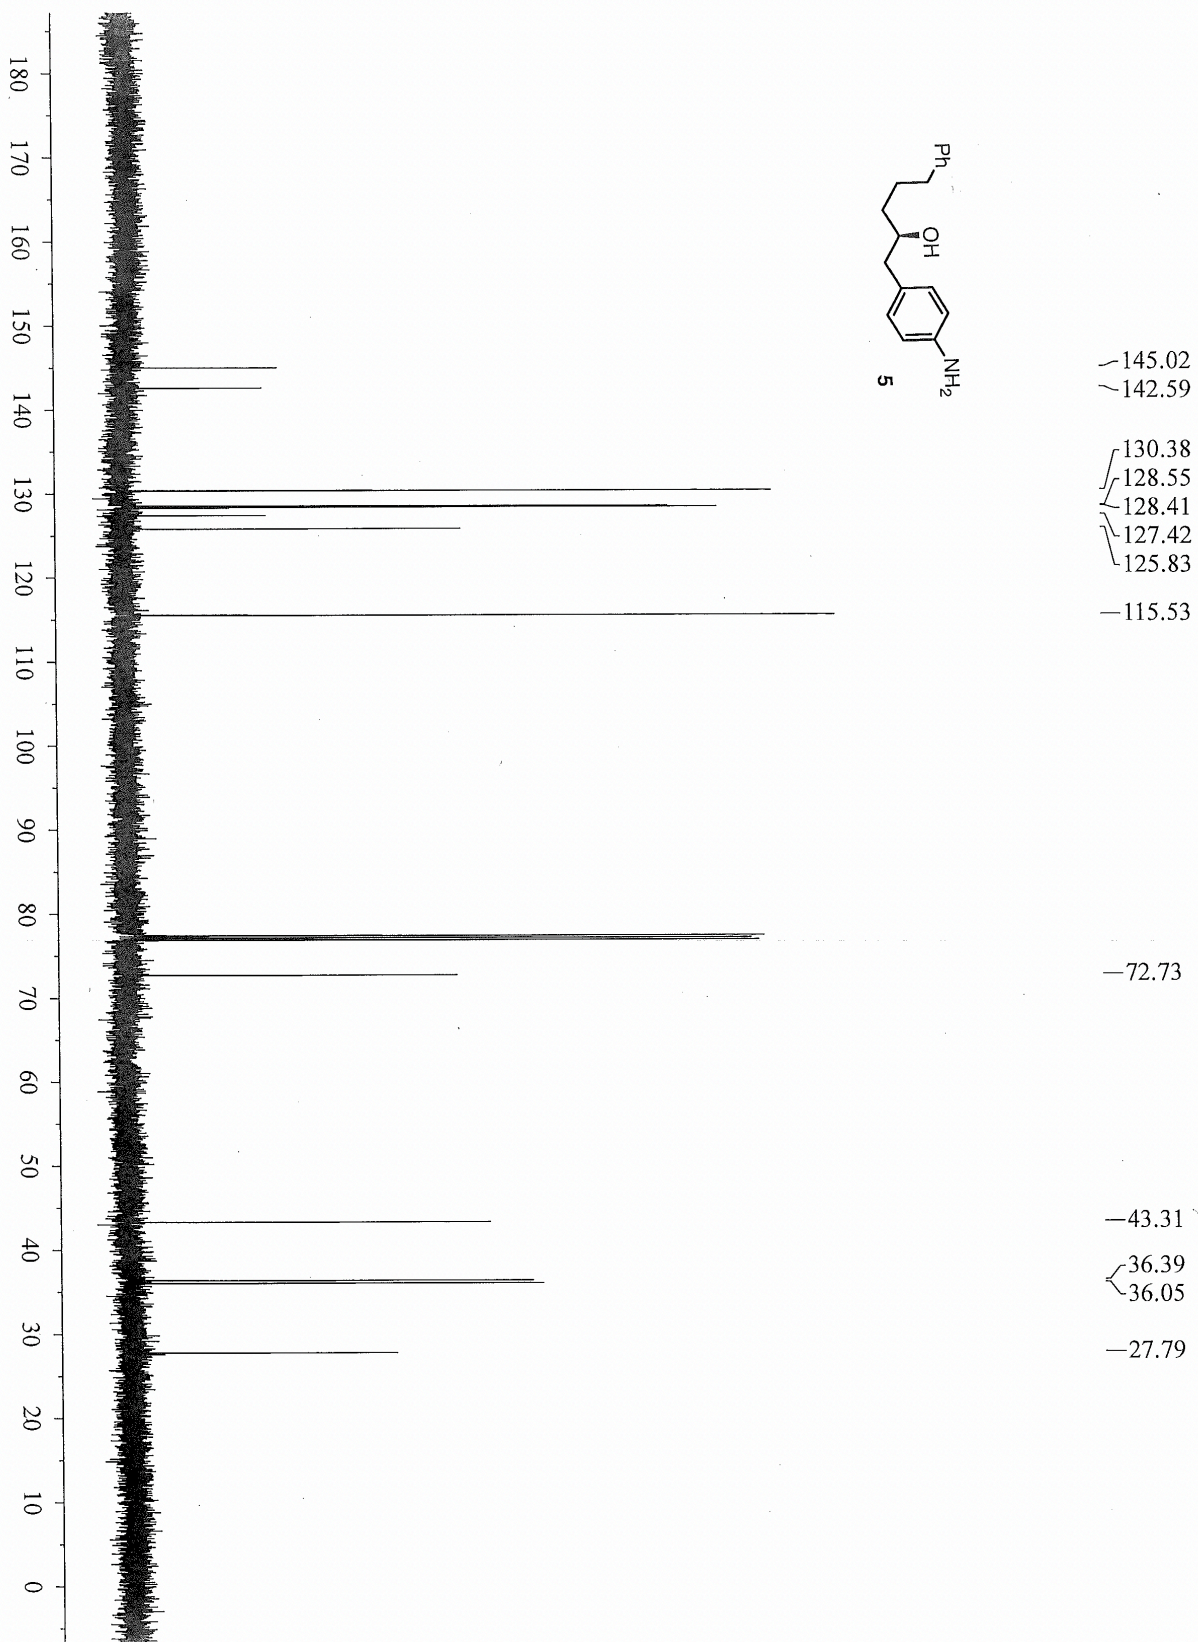

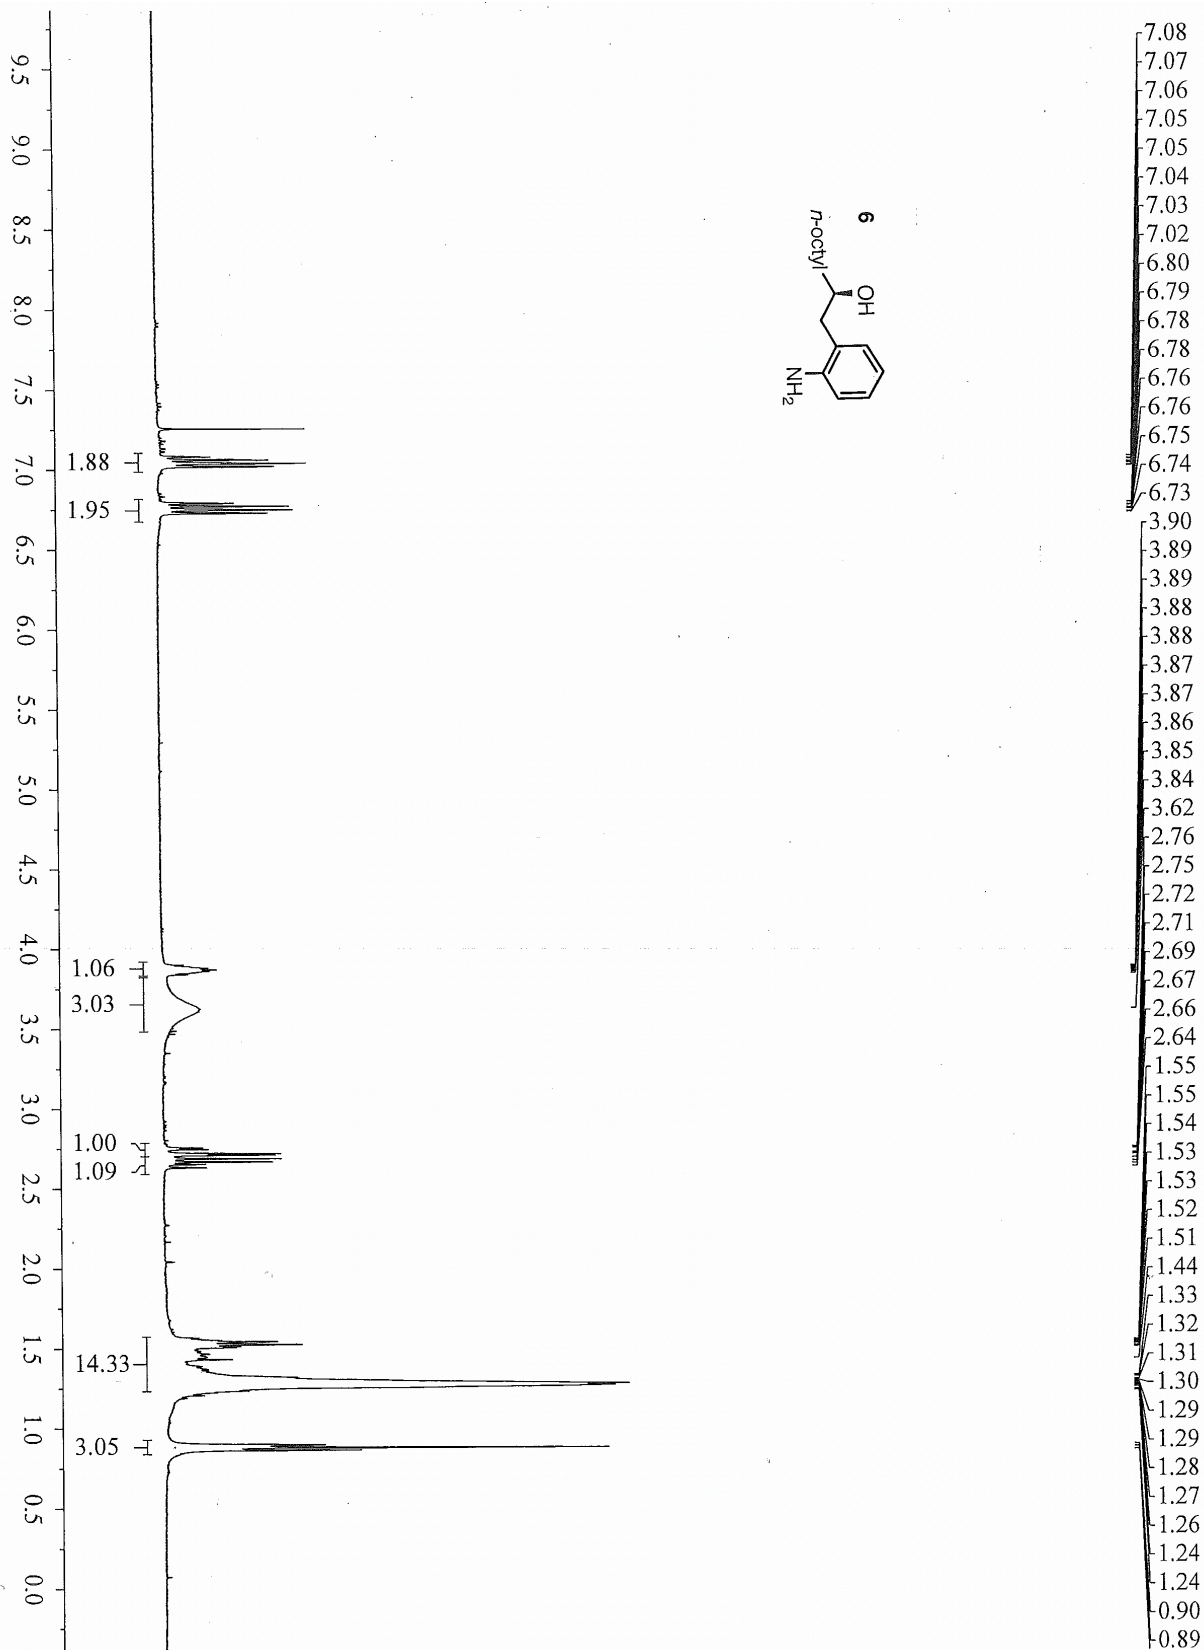



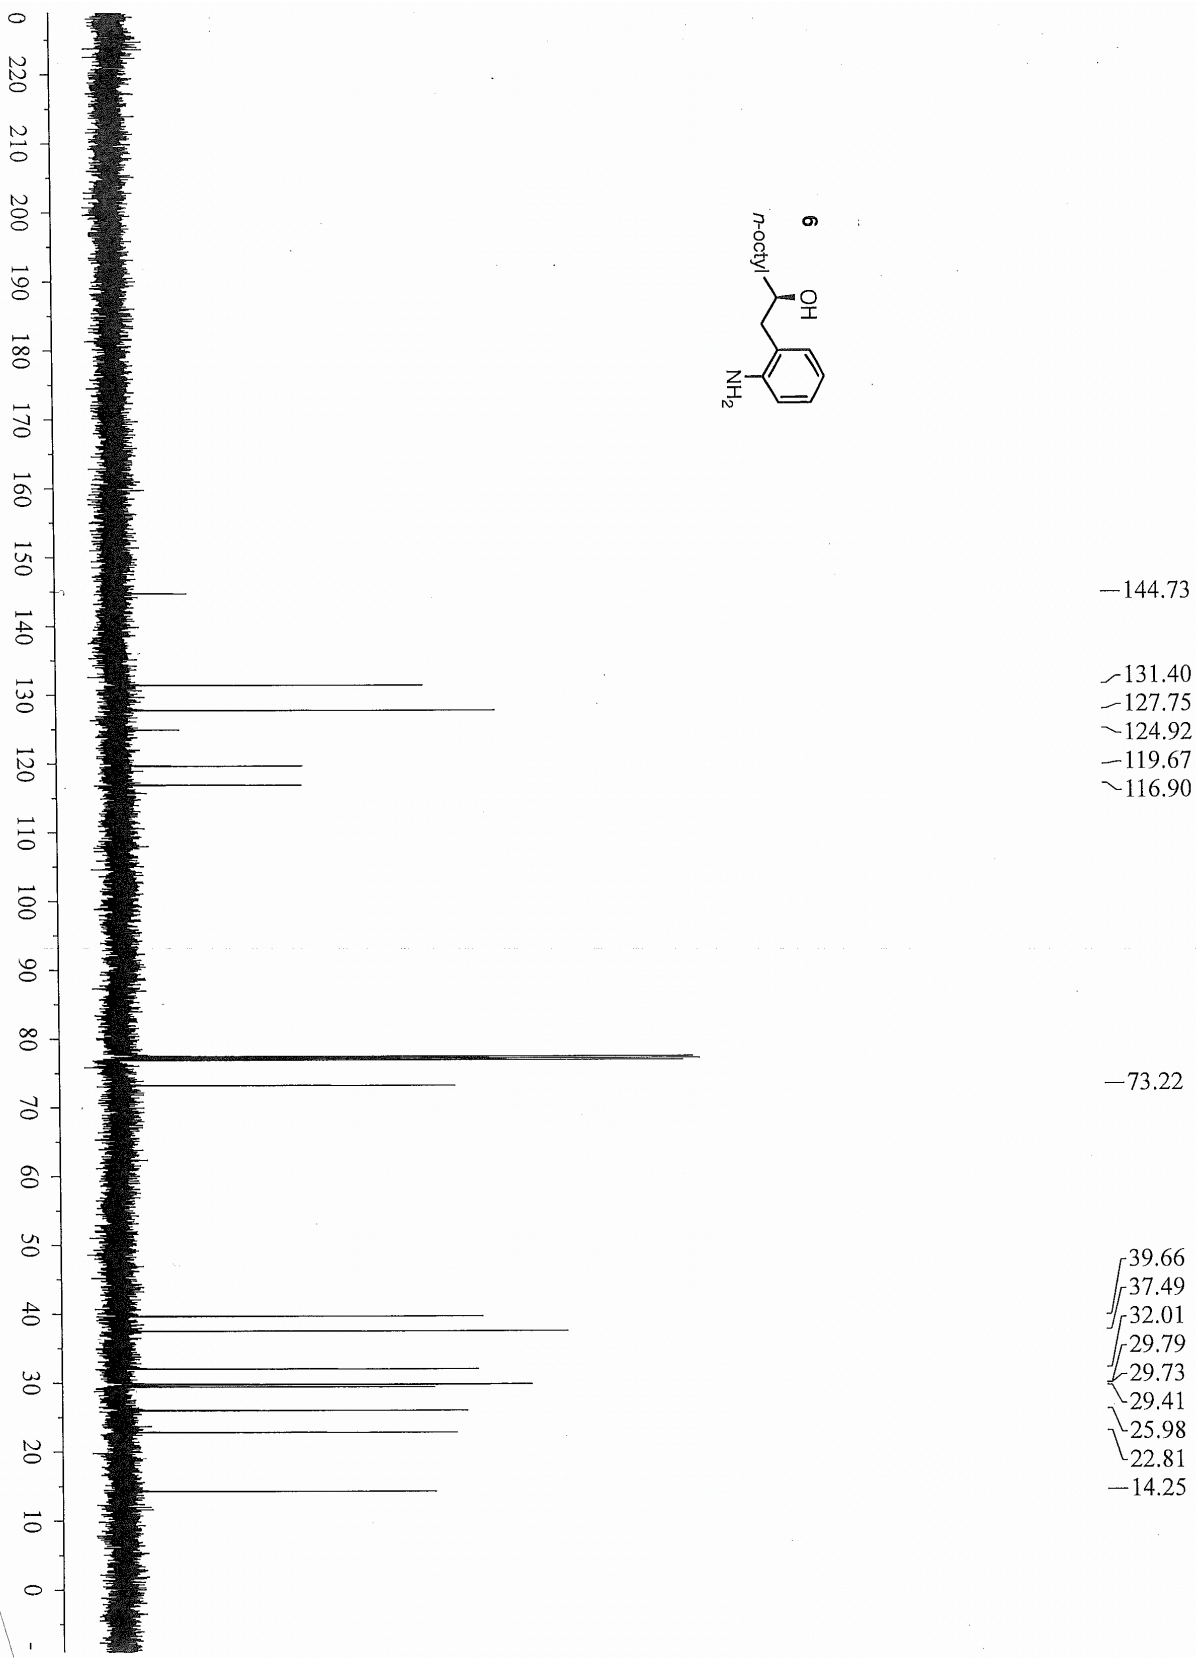

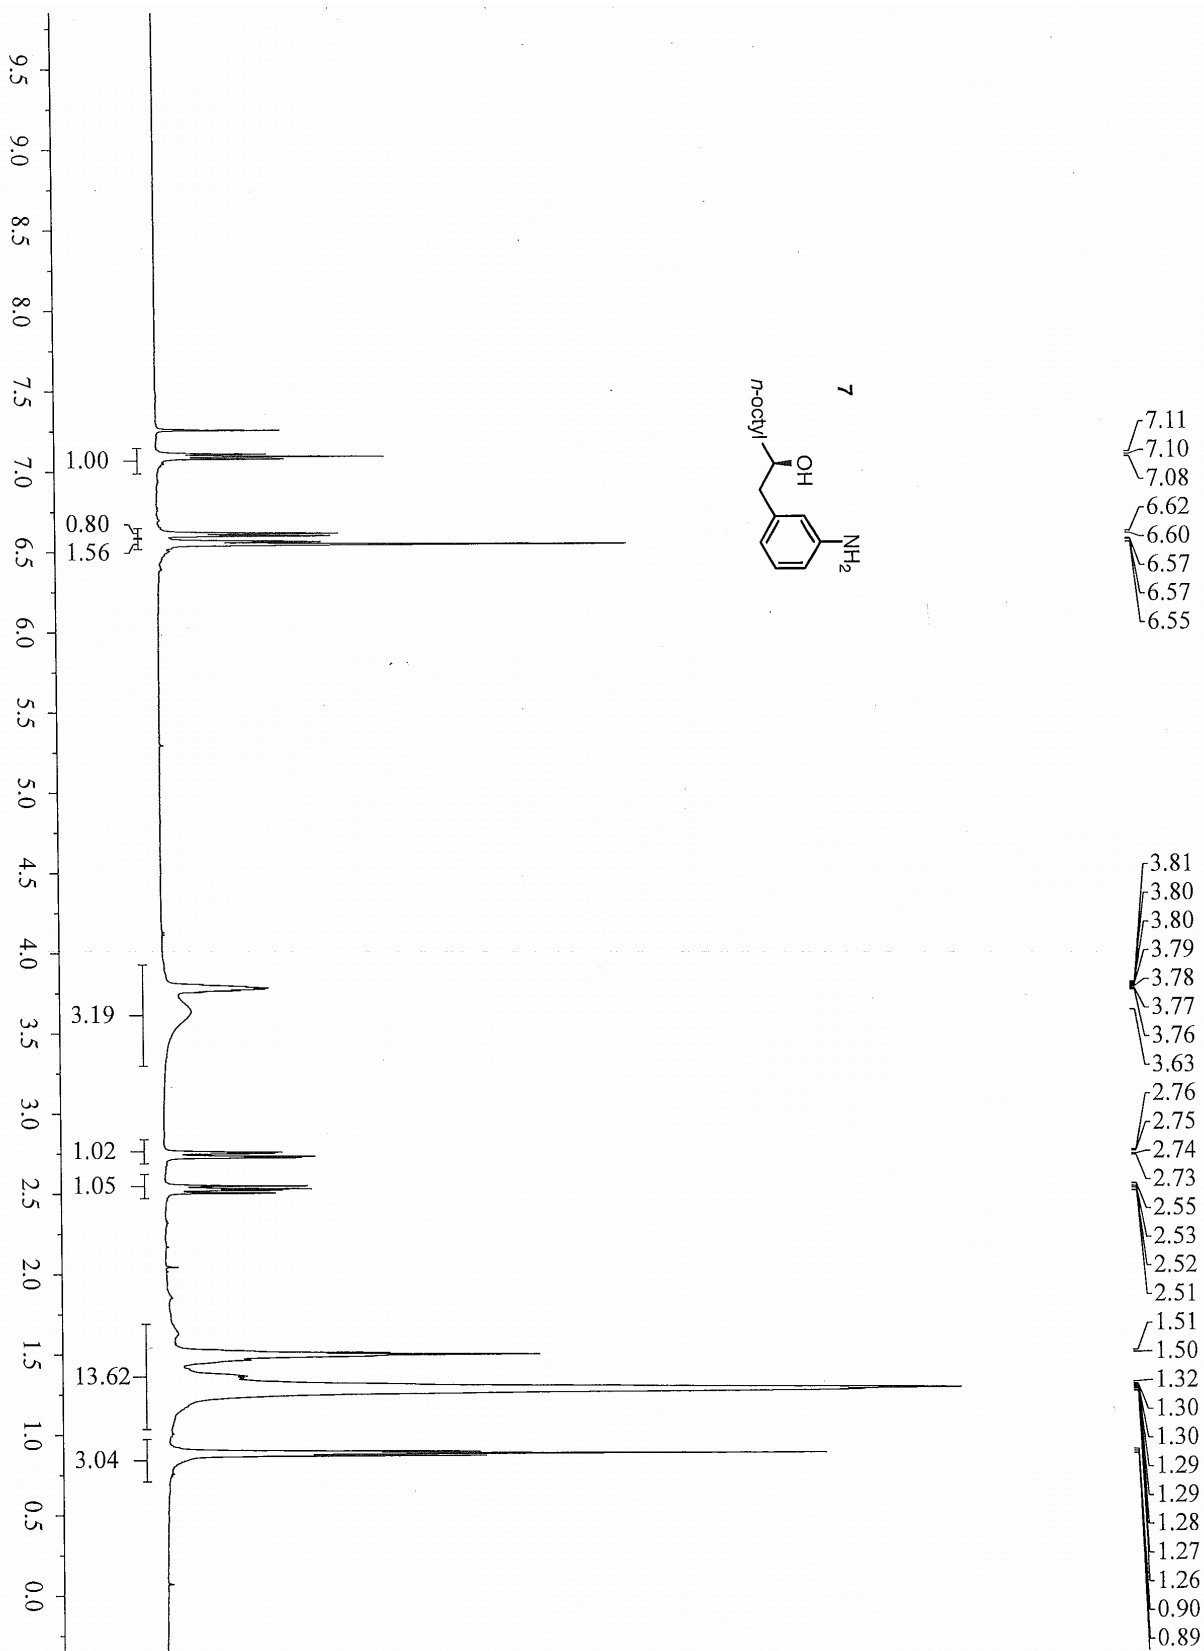

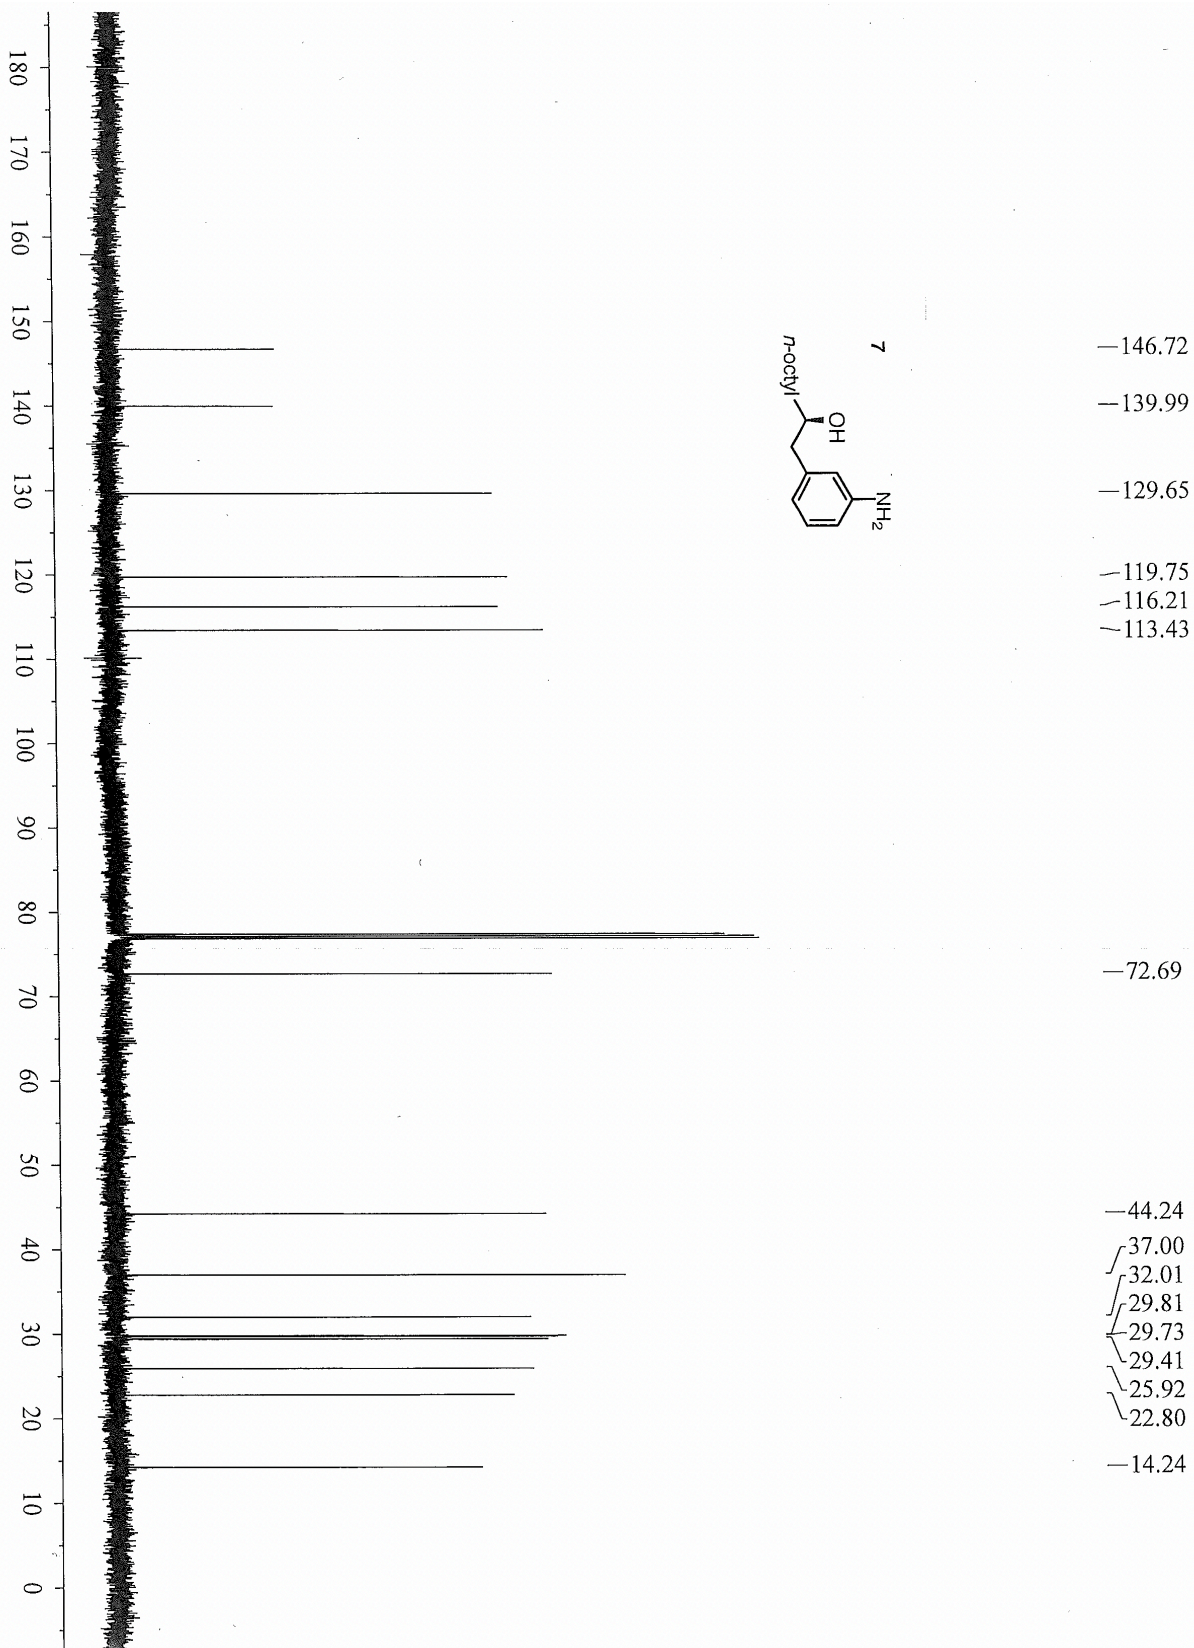

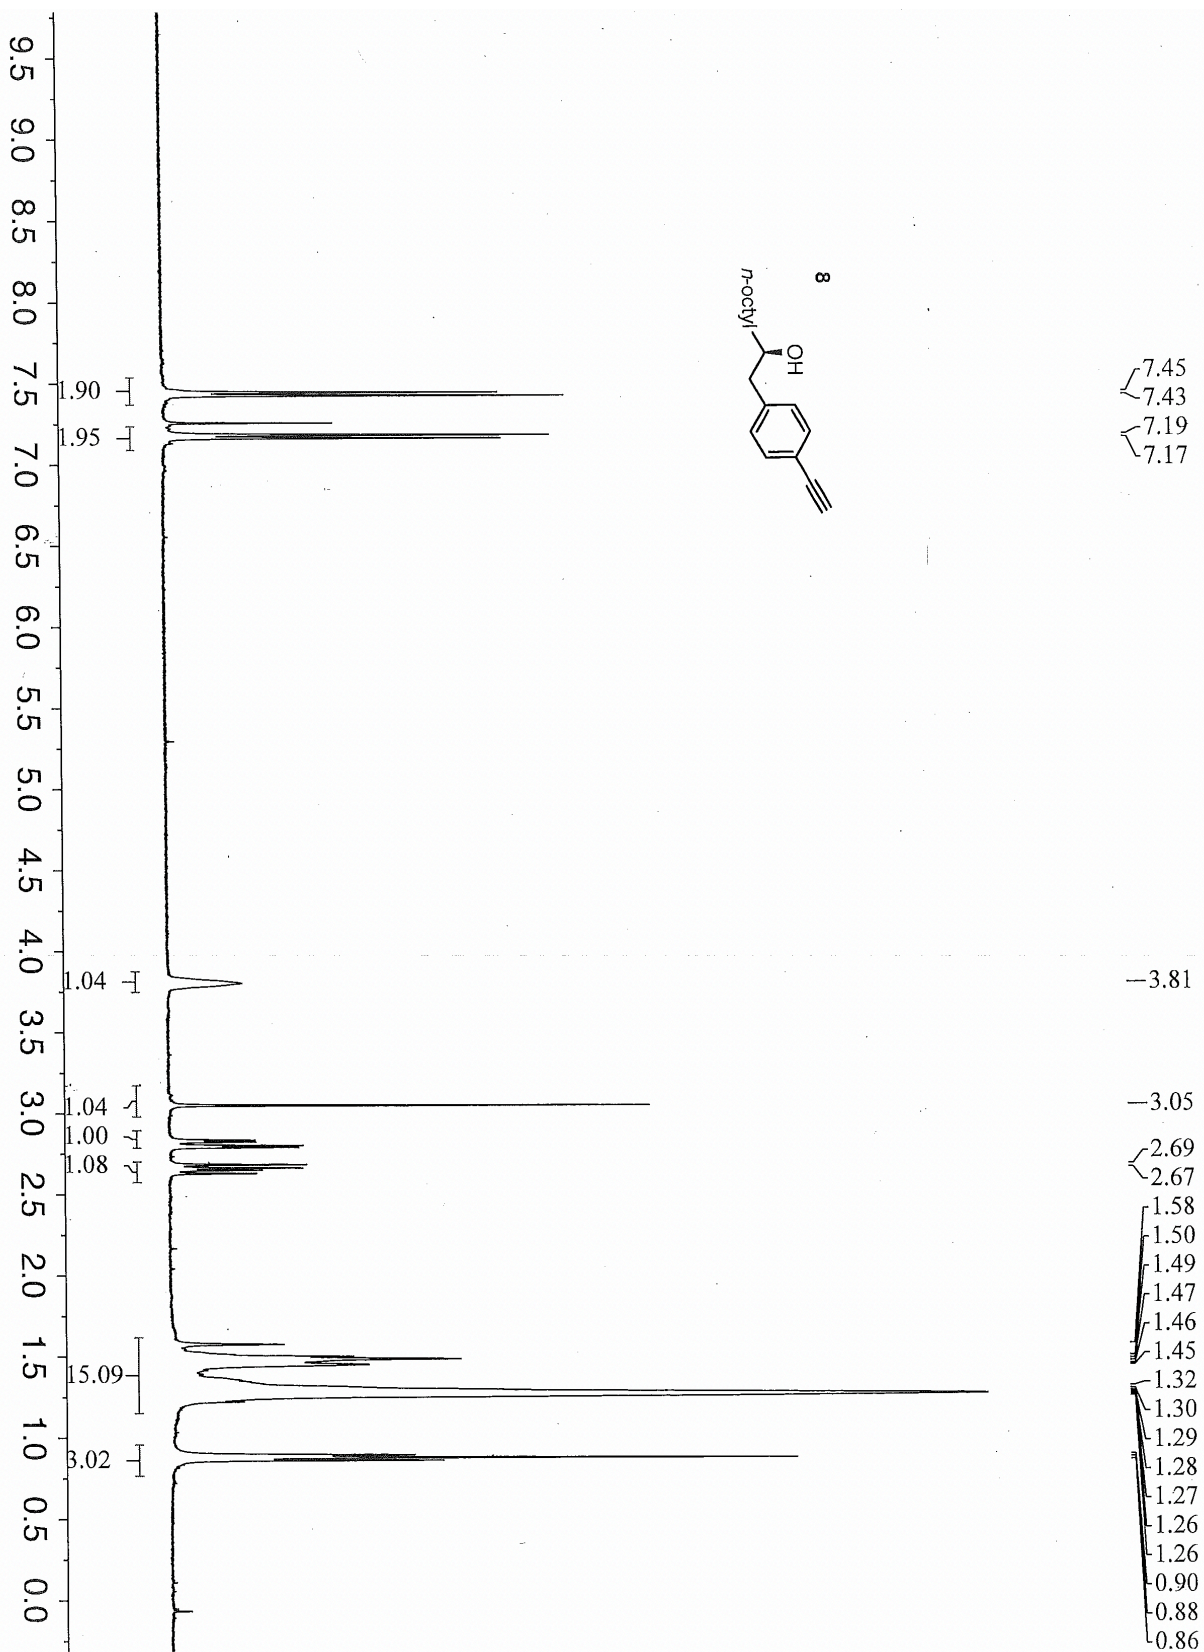



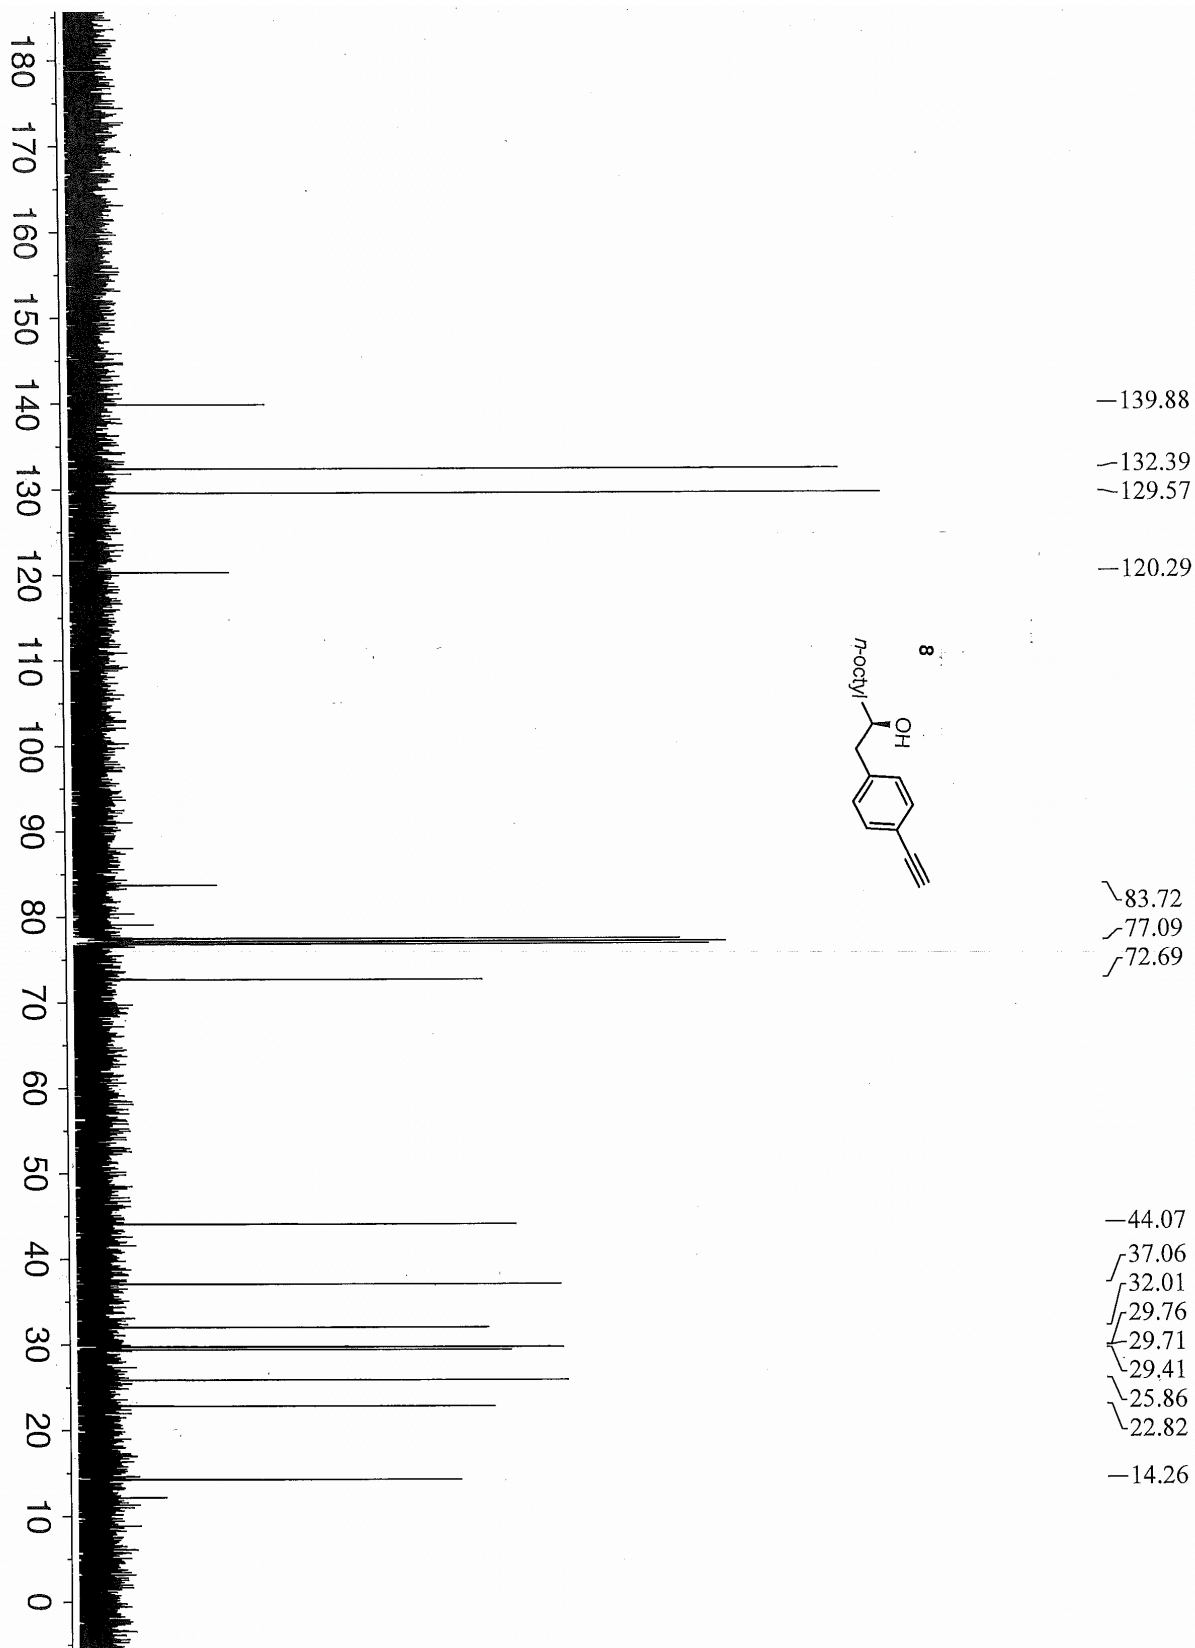



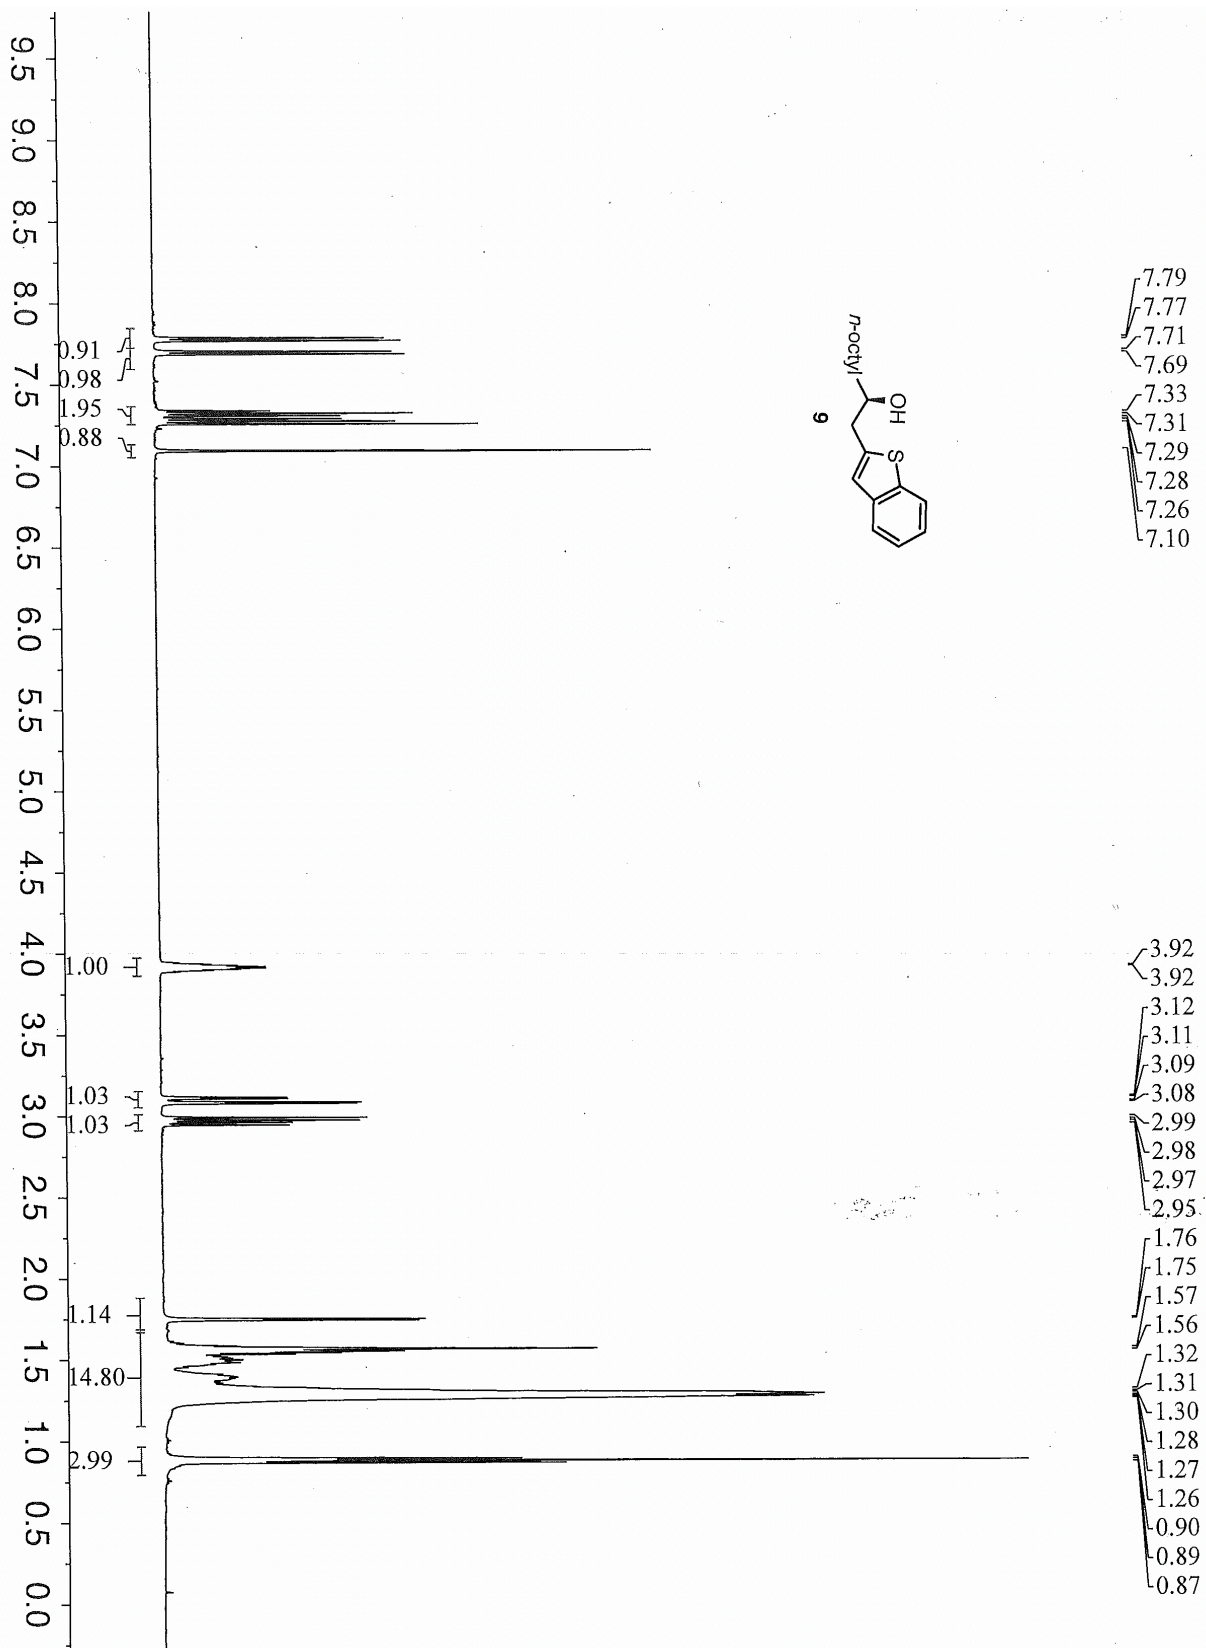

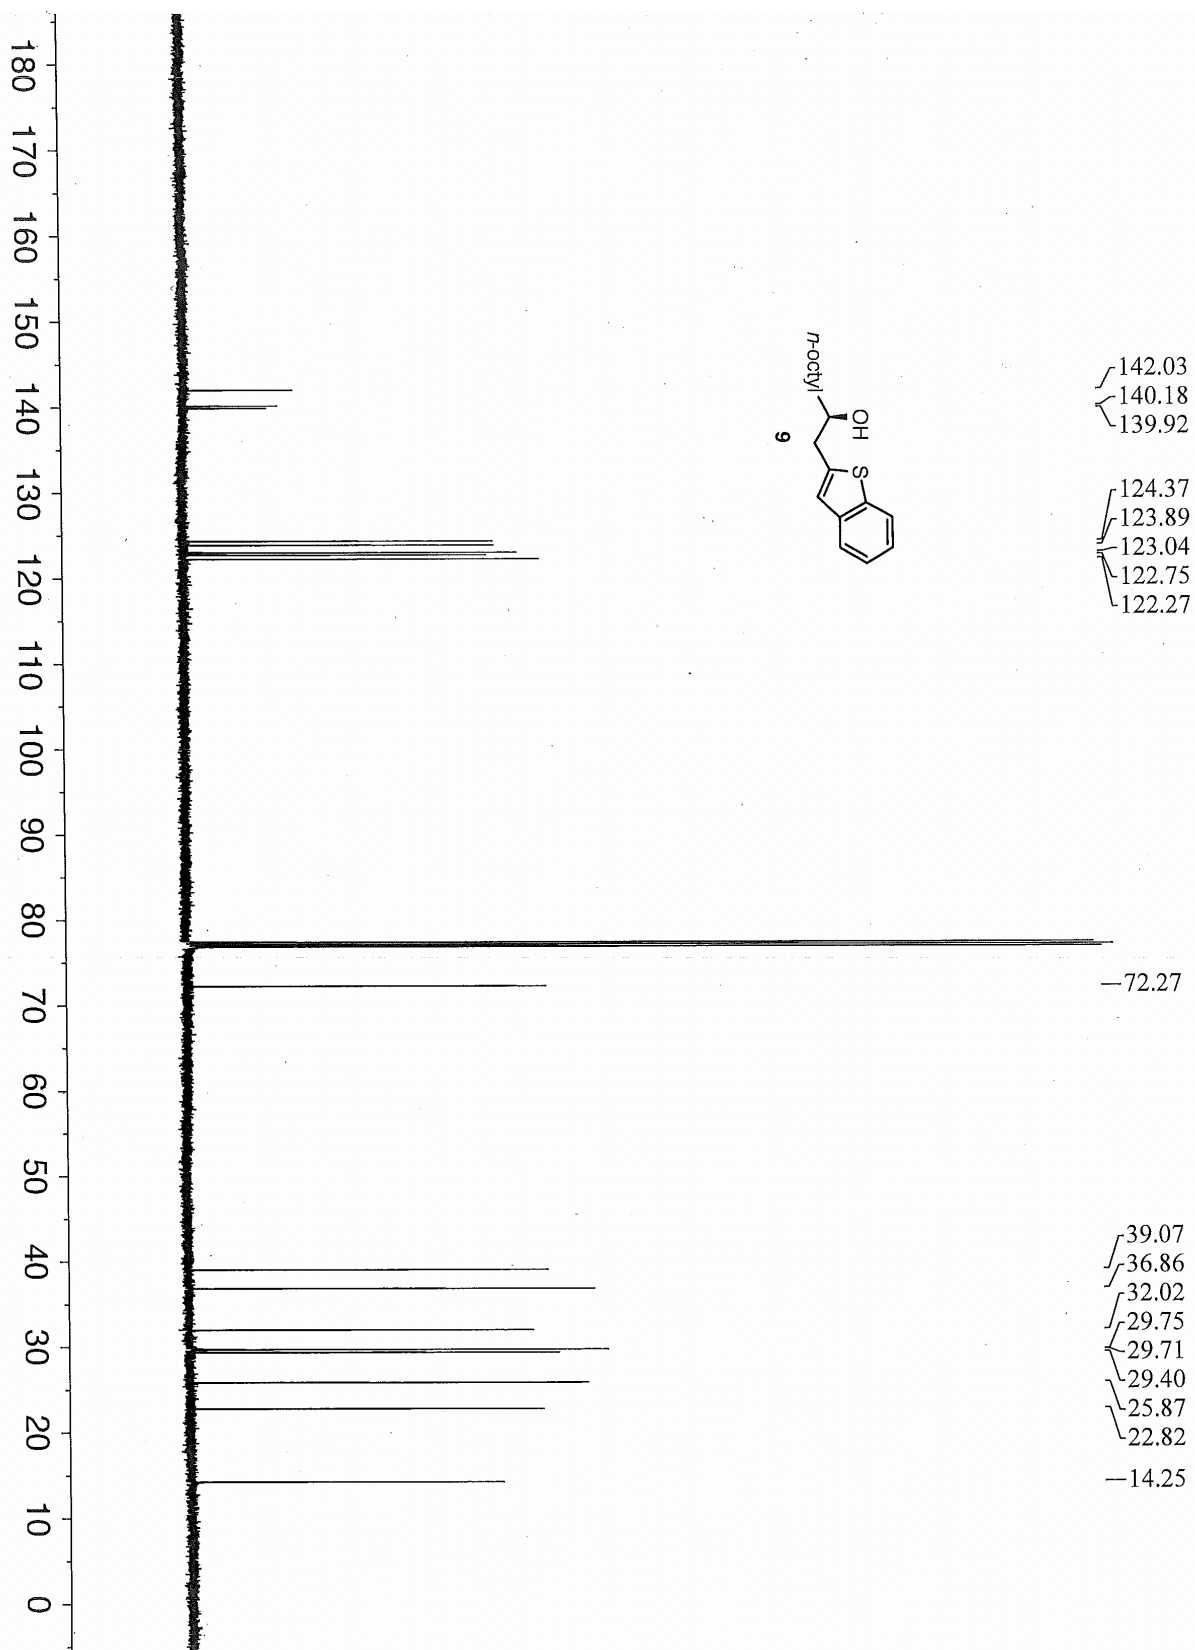

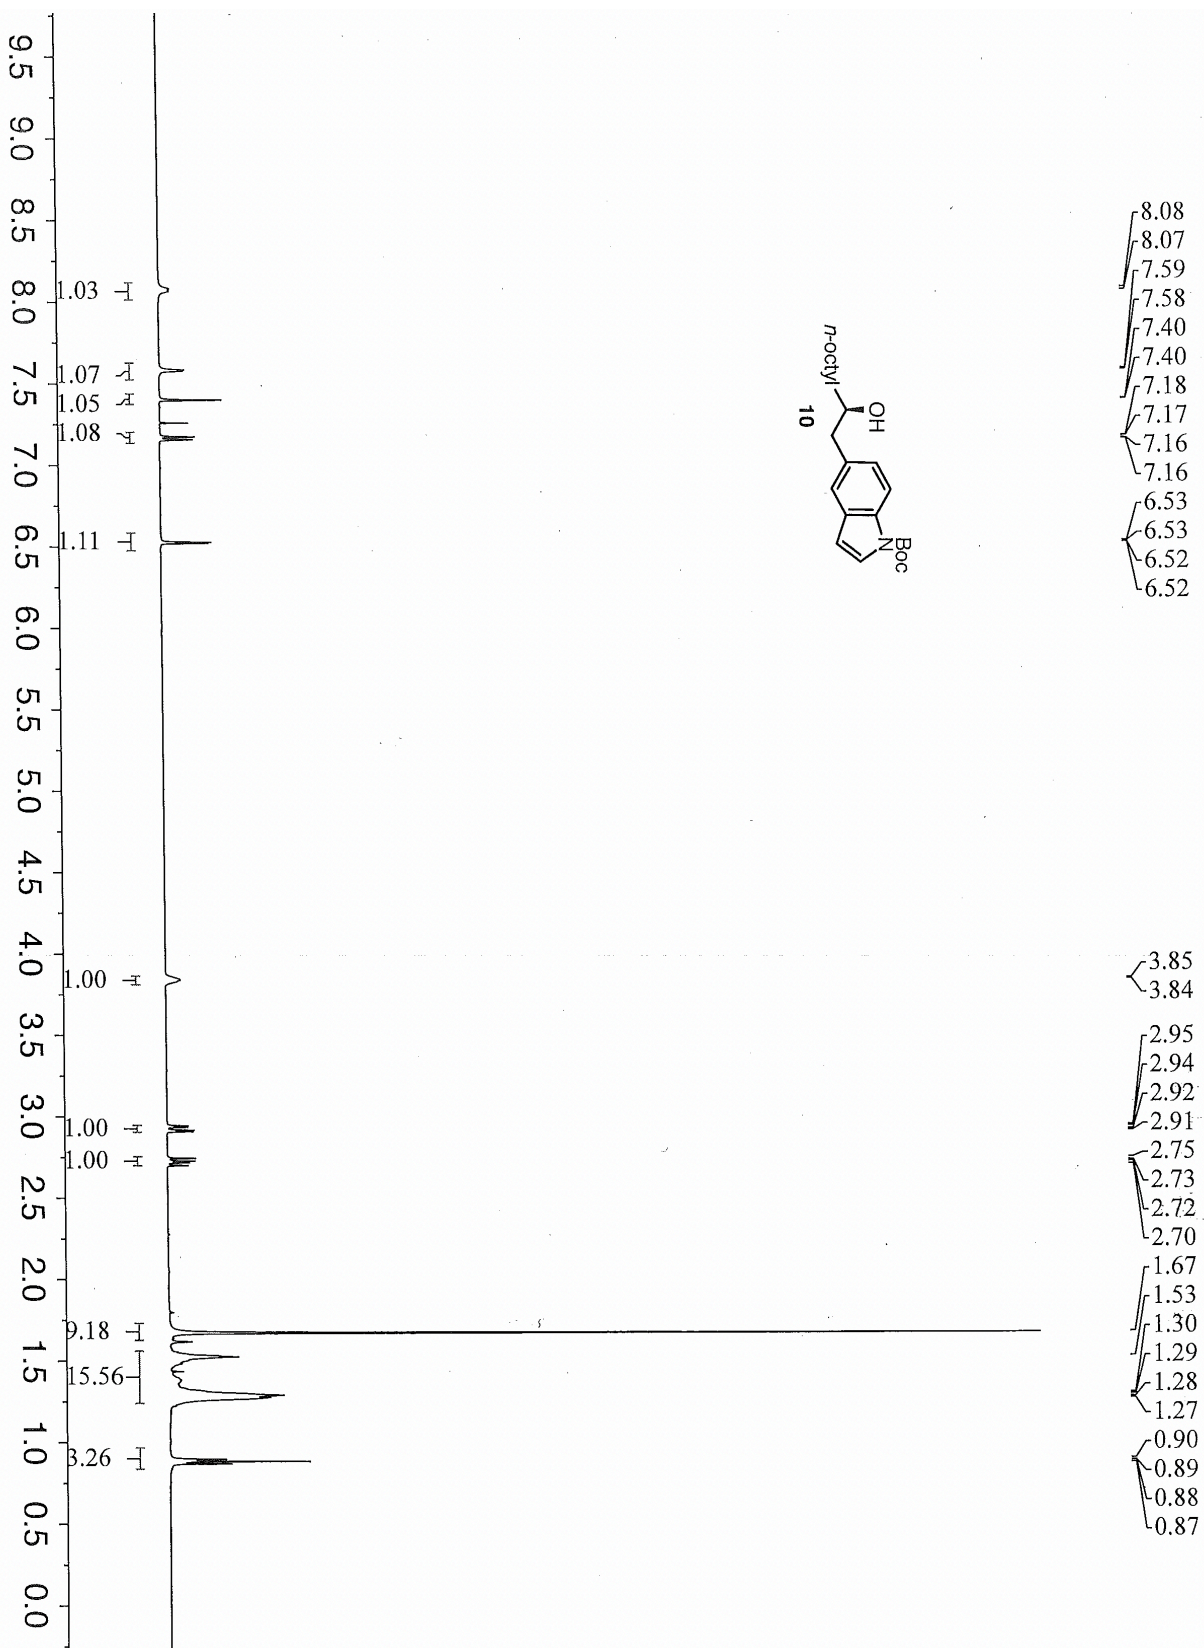

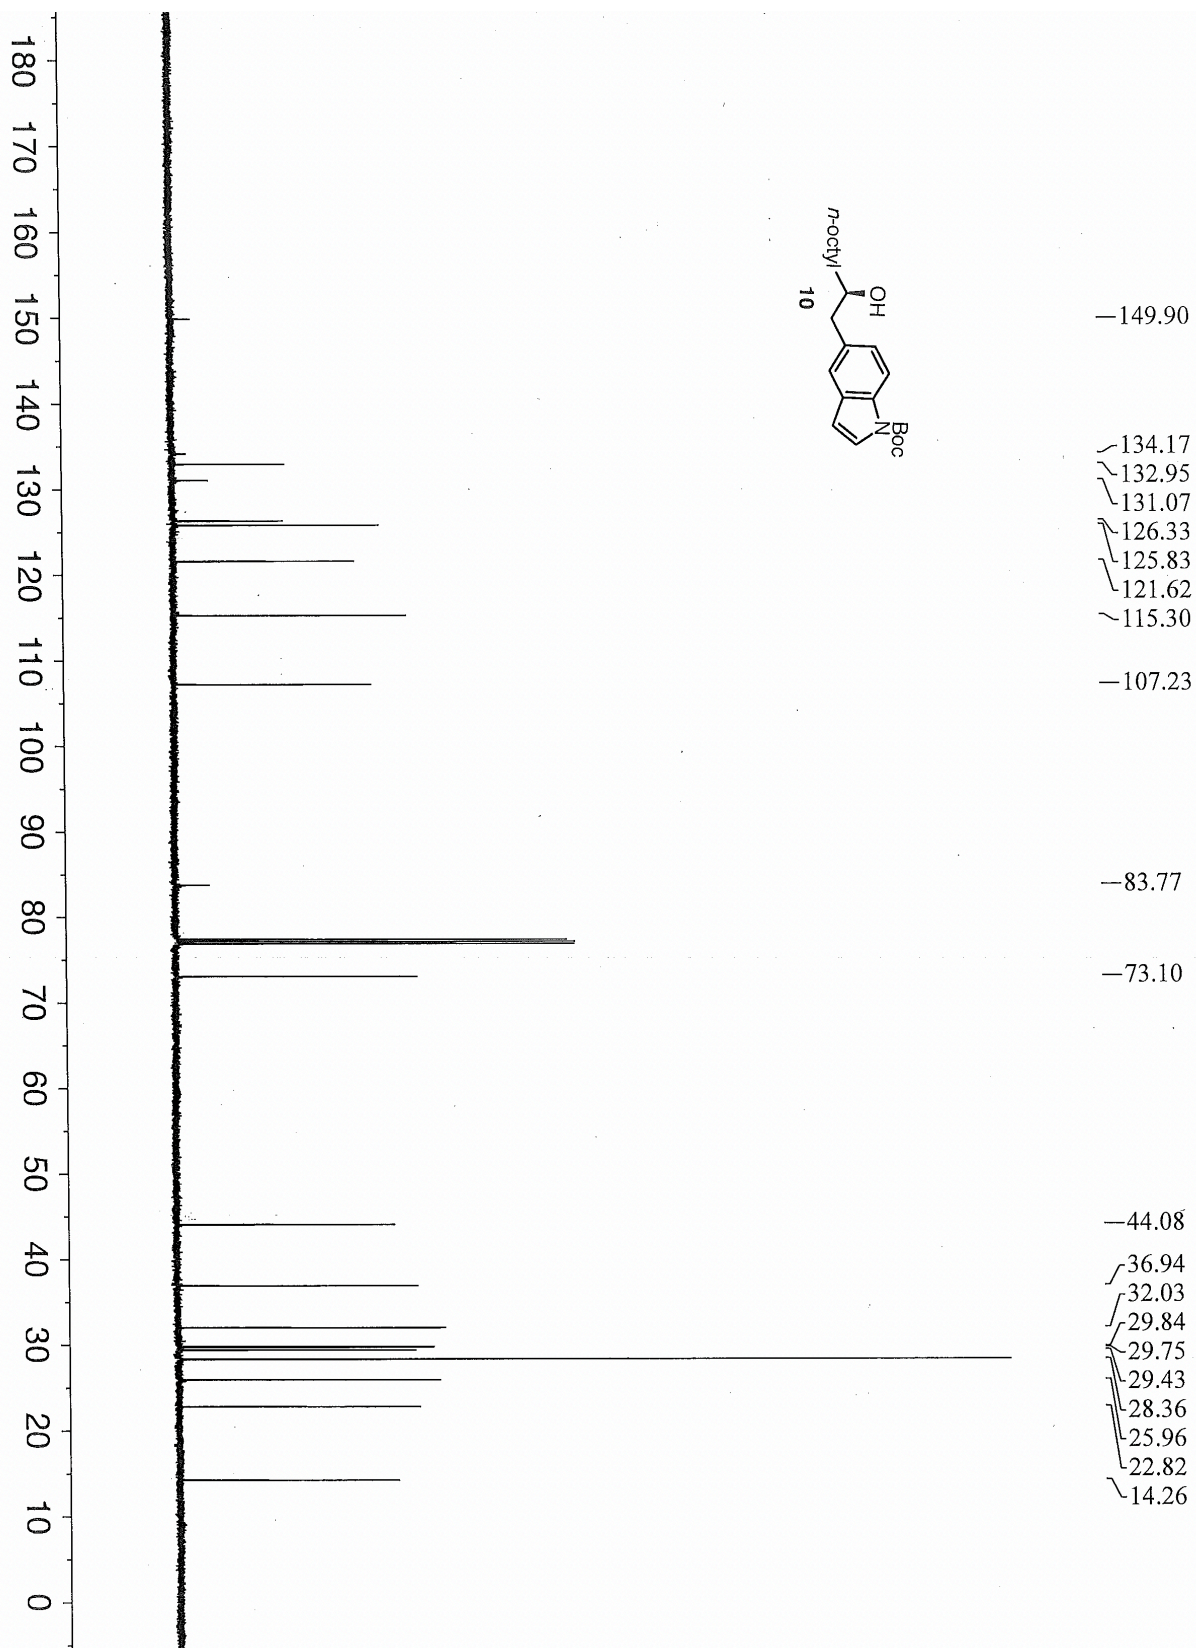



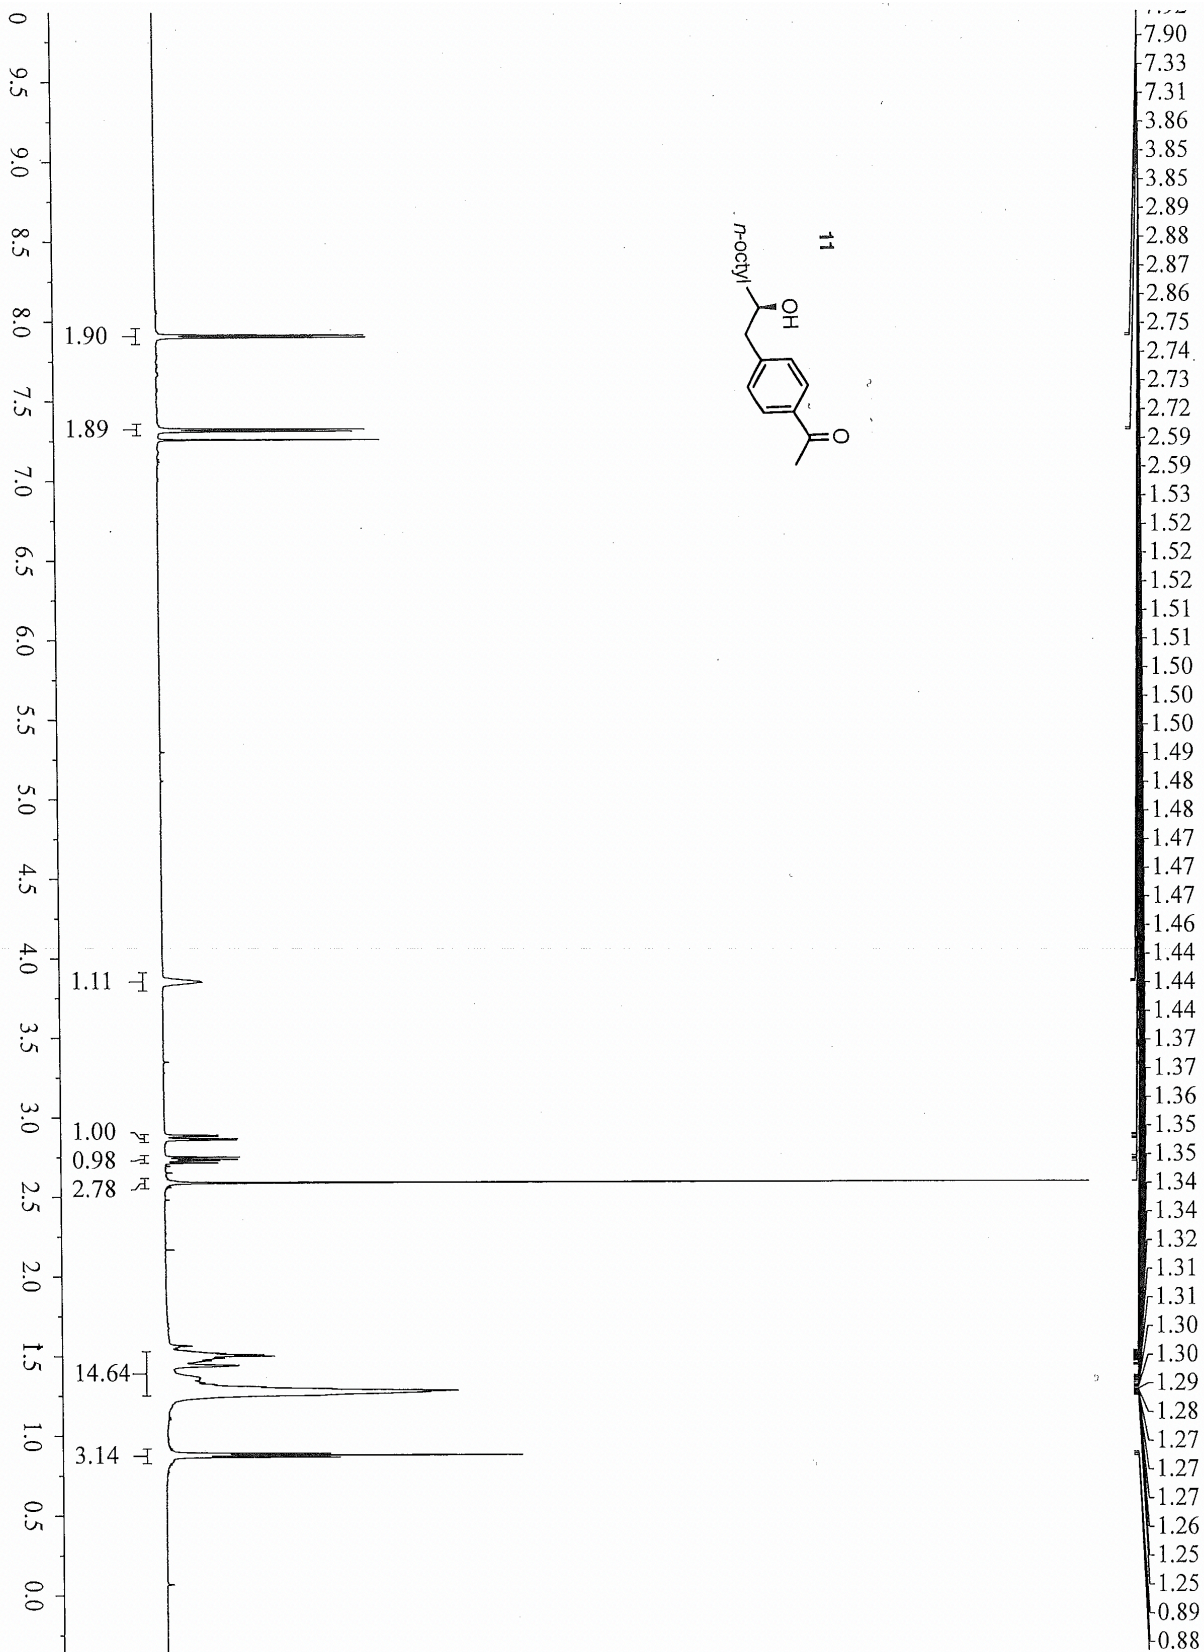

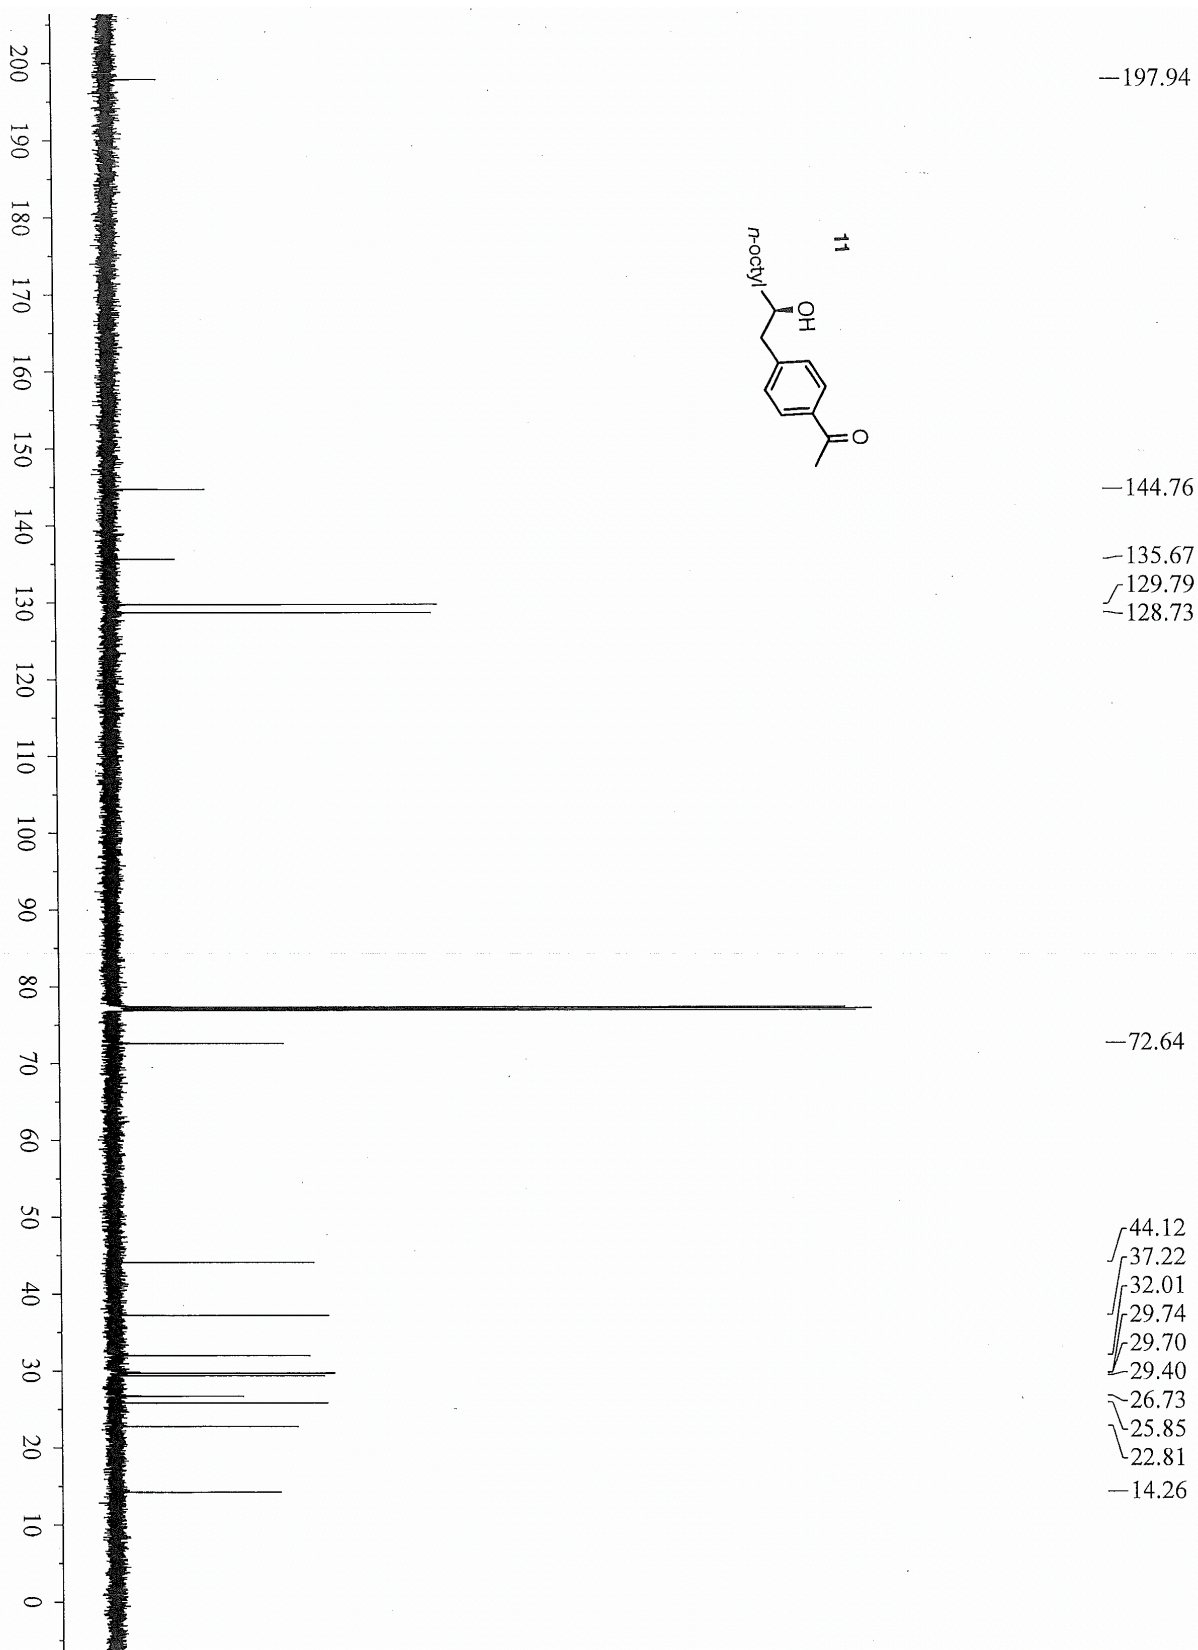

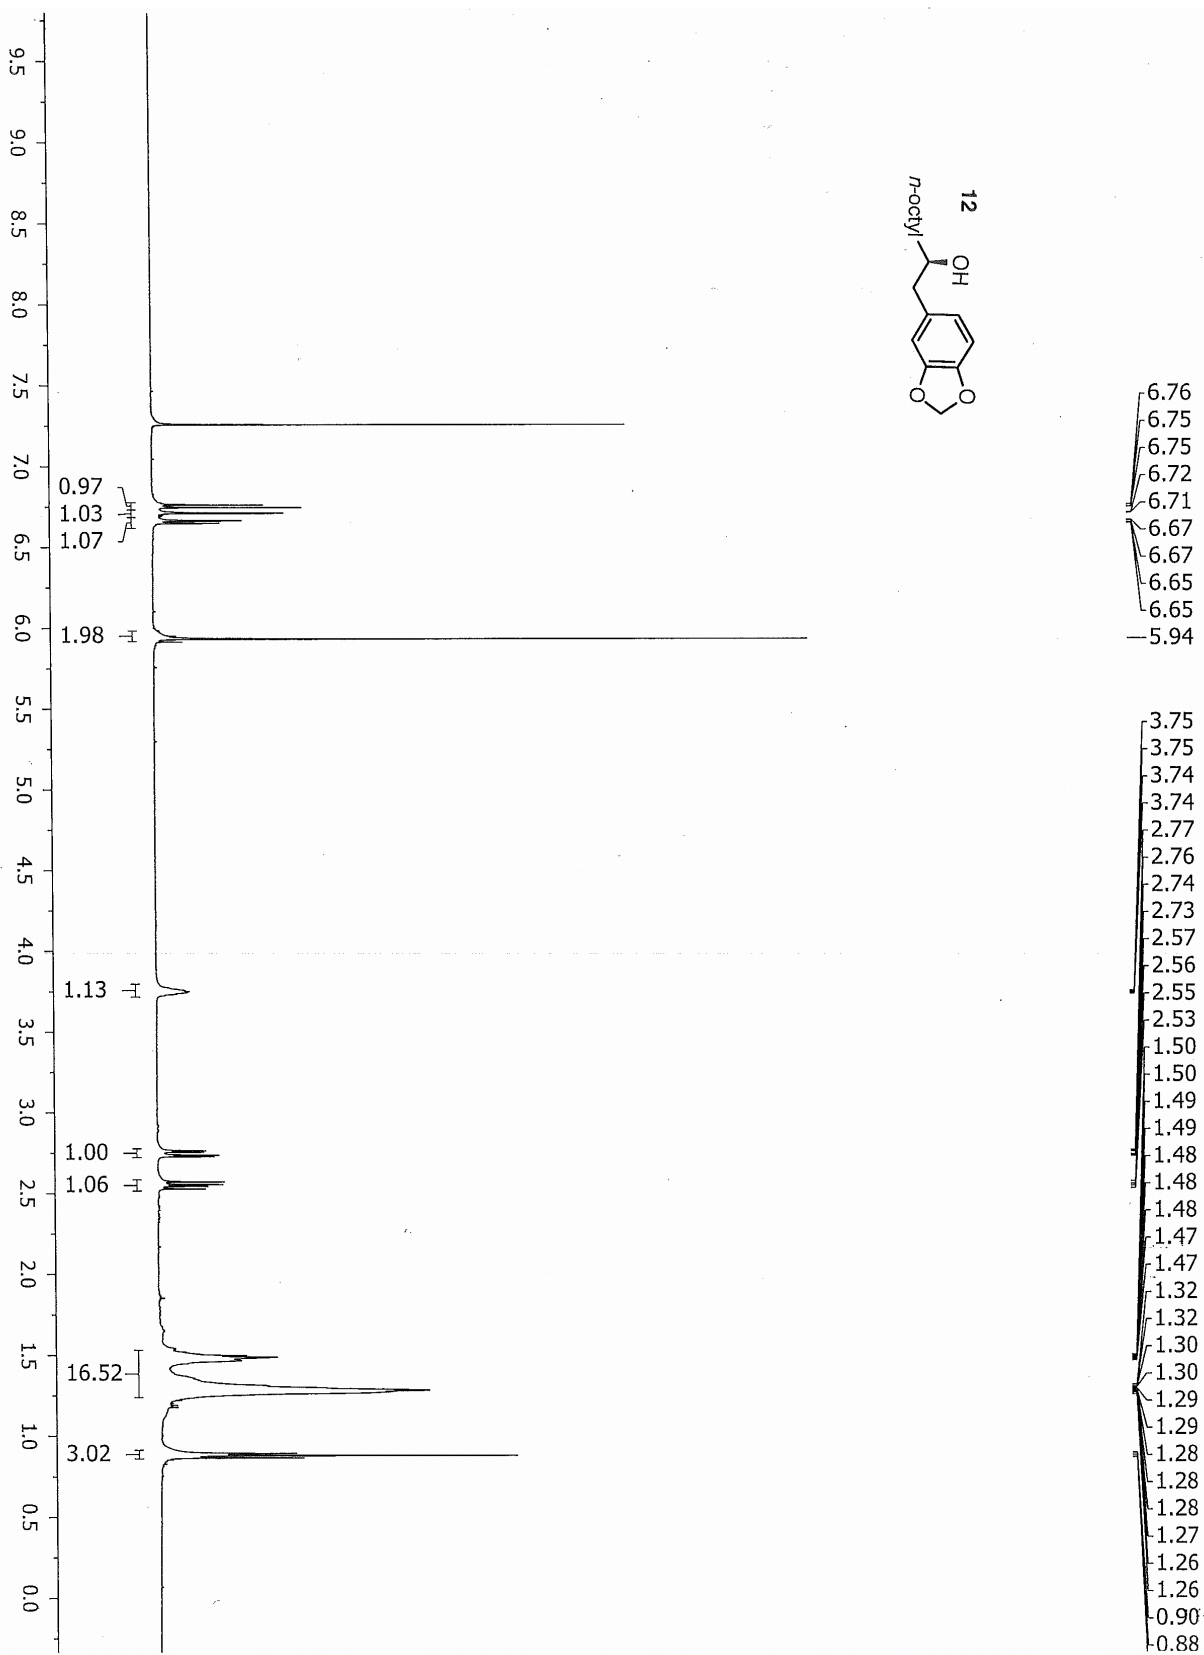

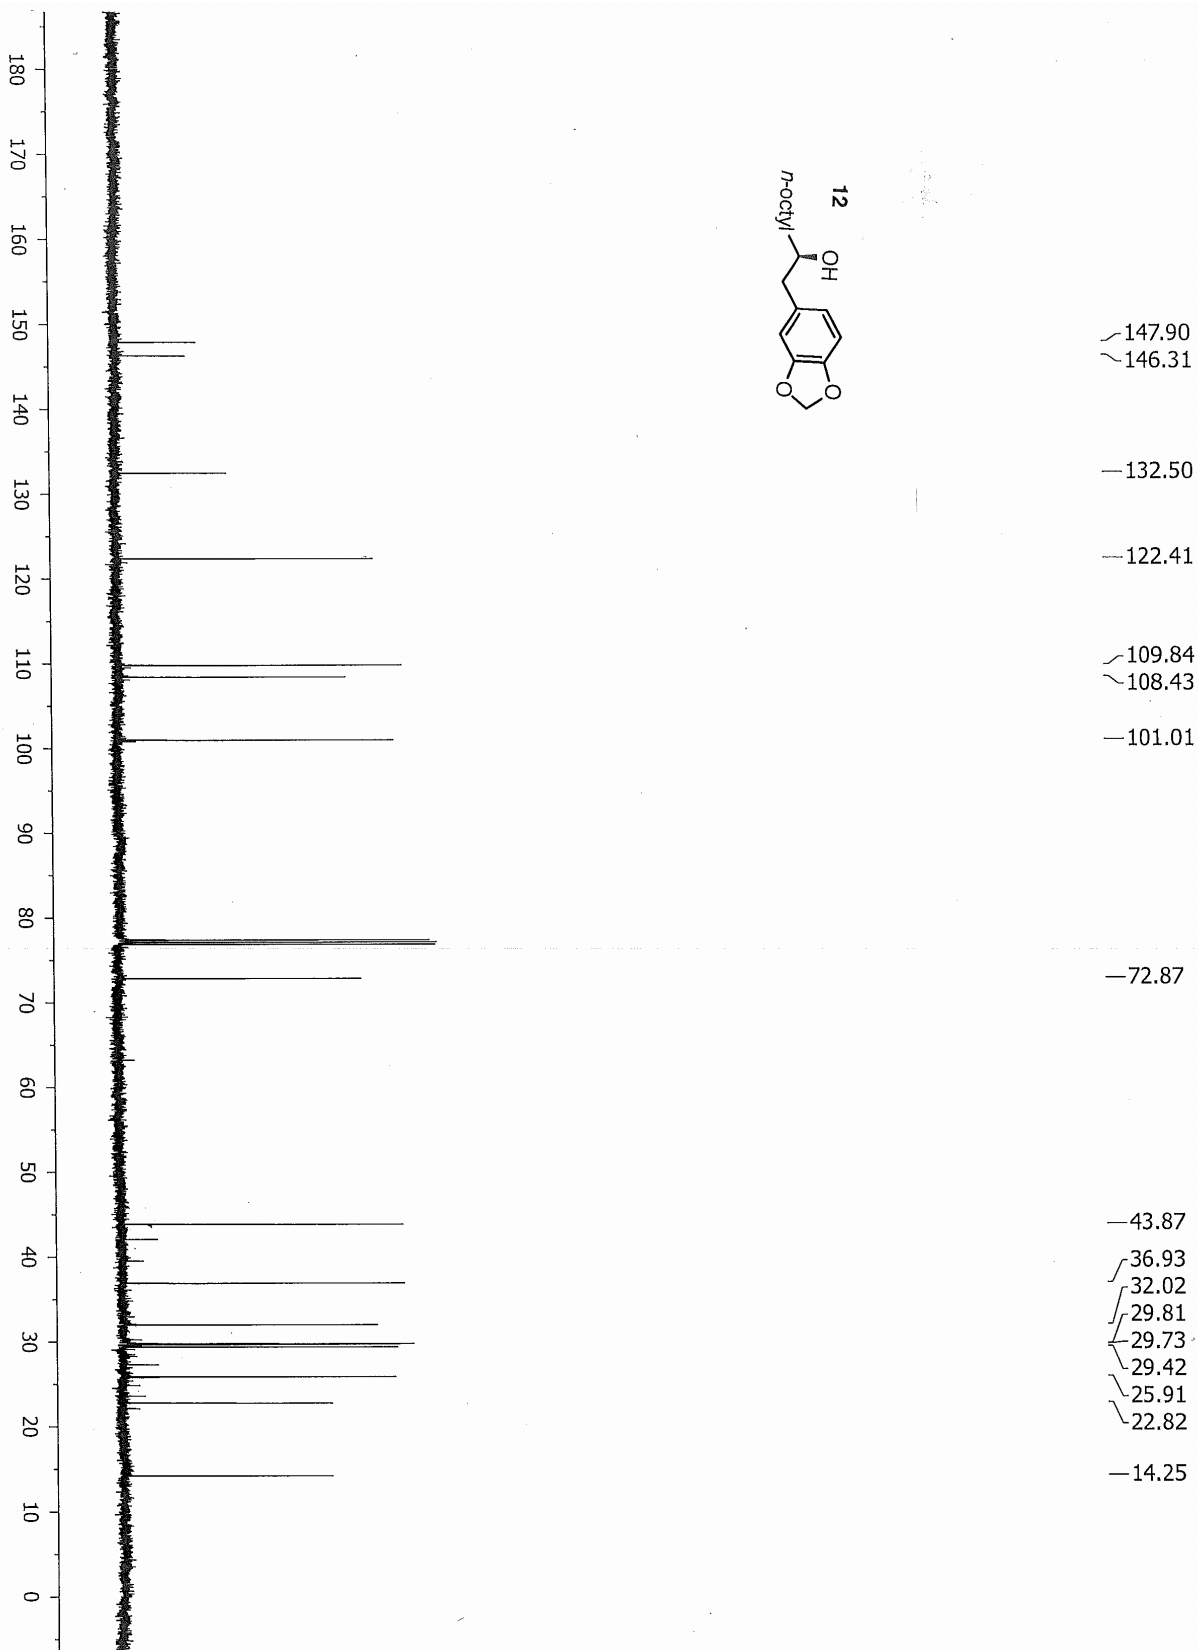



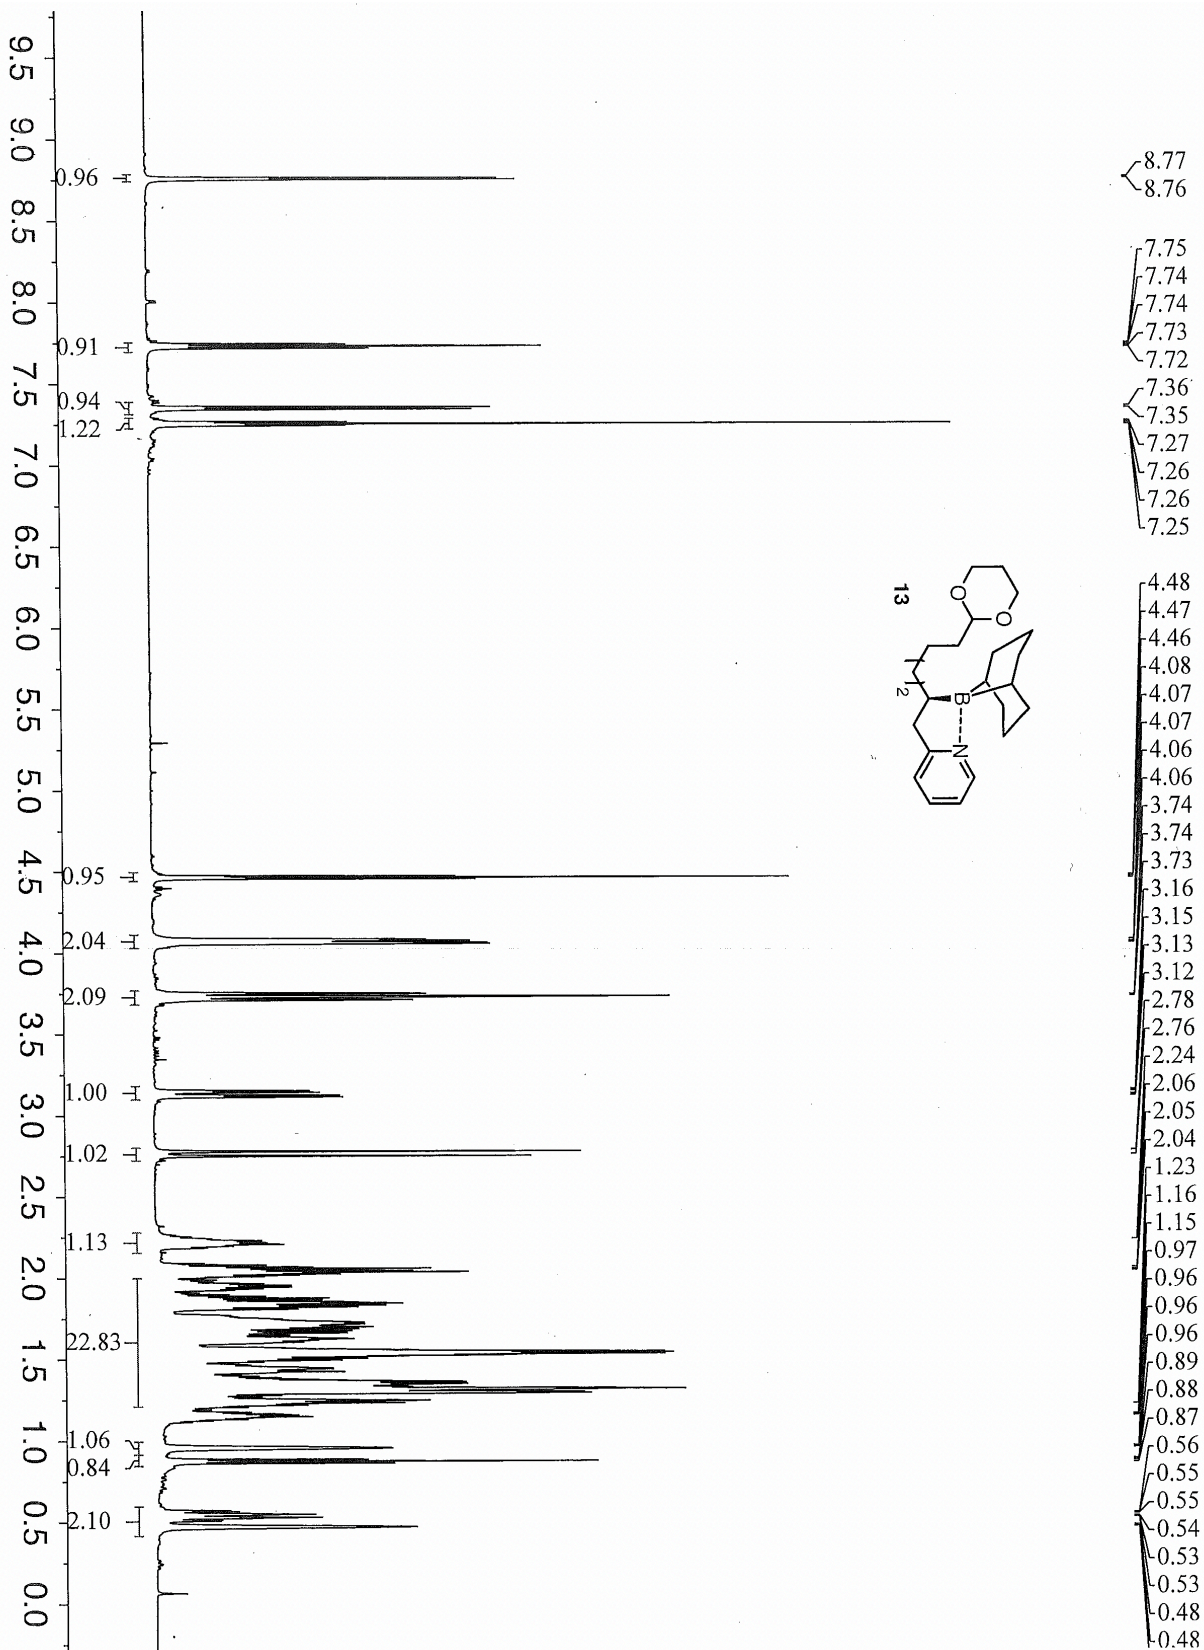

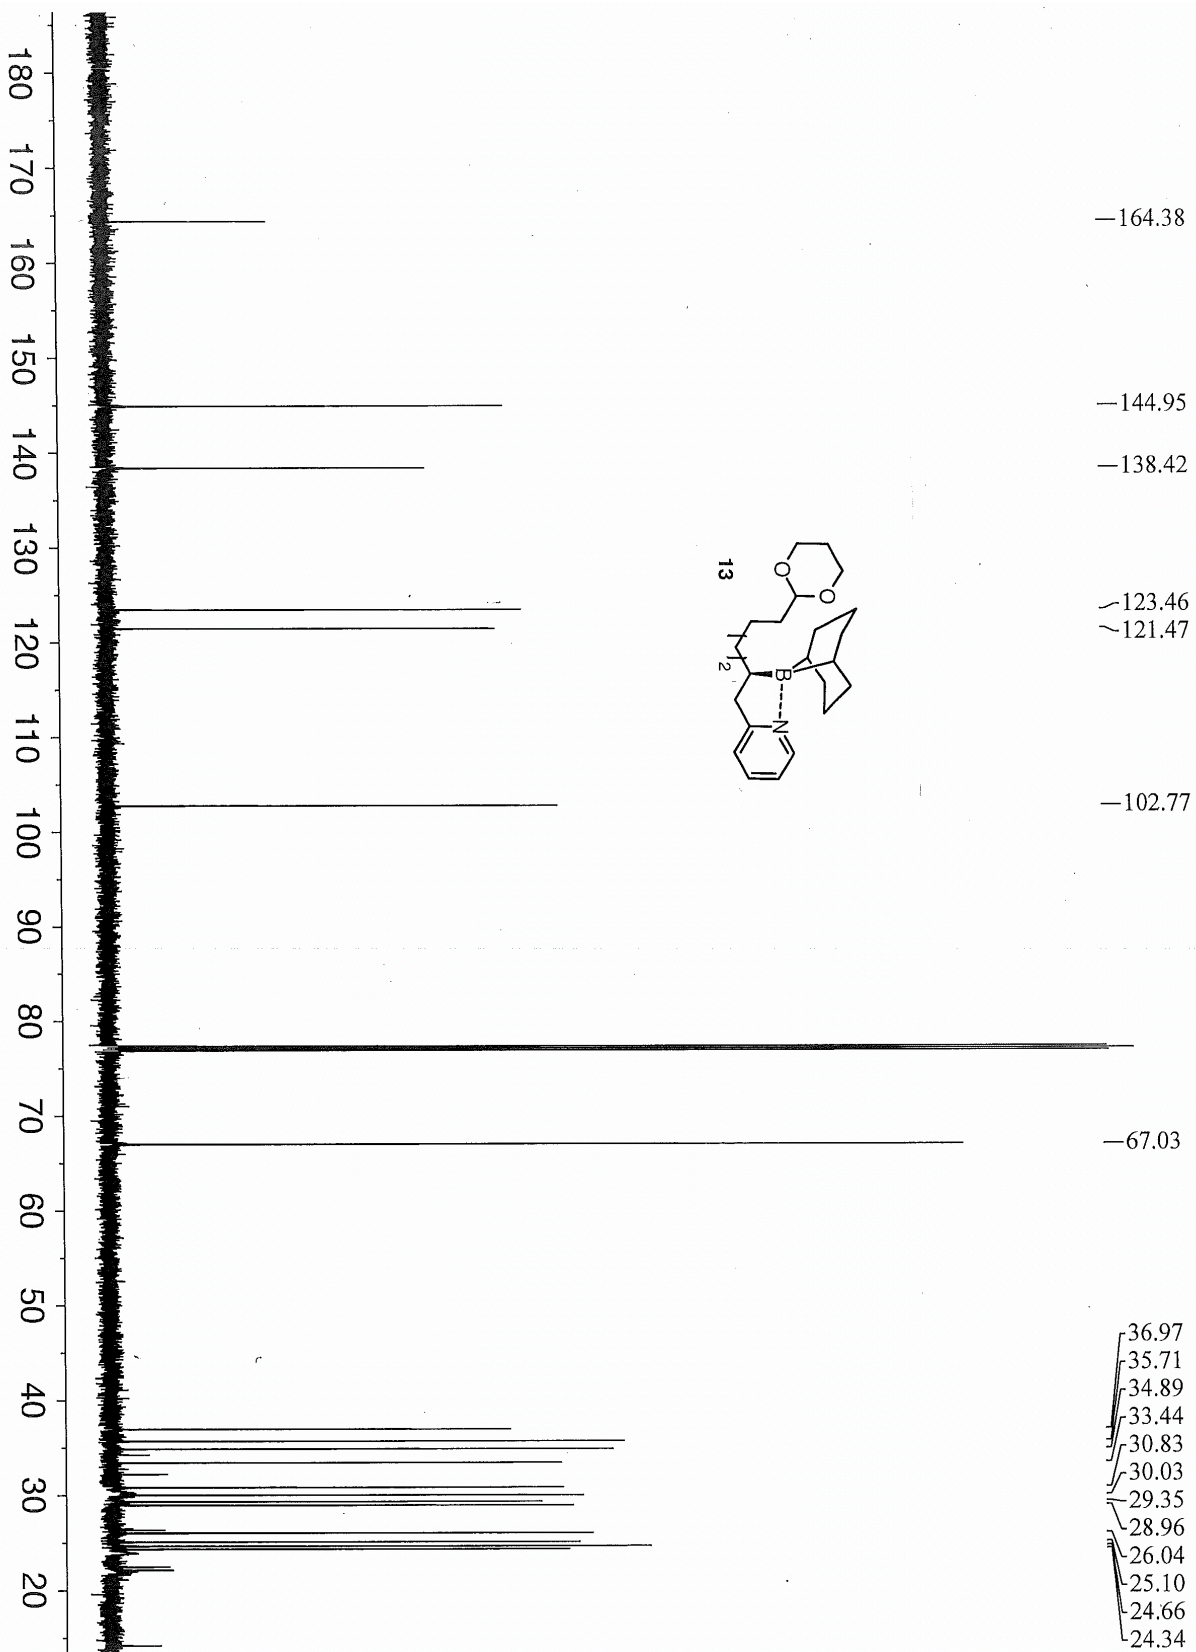

**$^{11}\text{B}$  NMR**

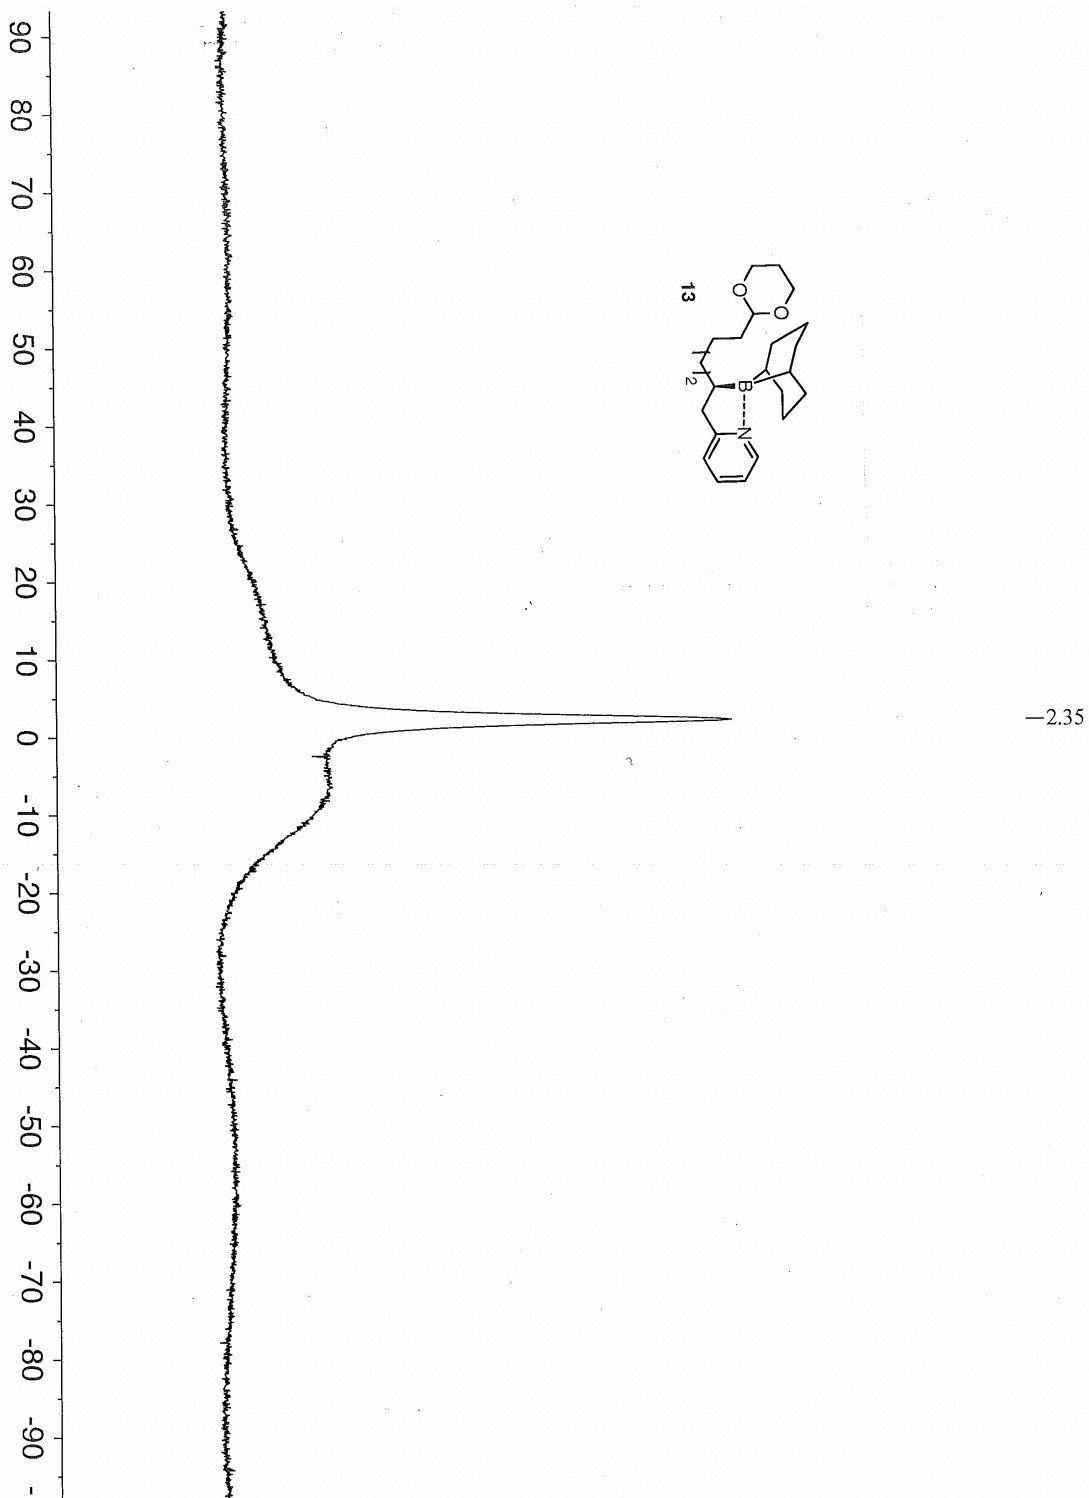

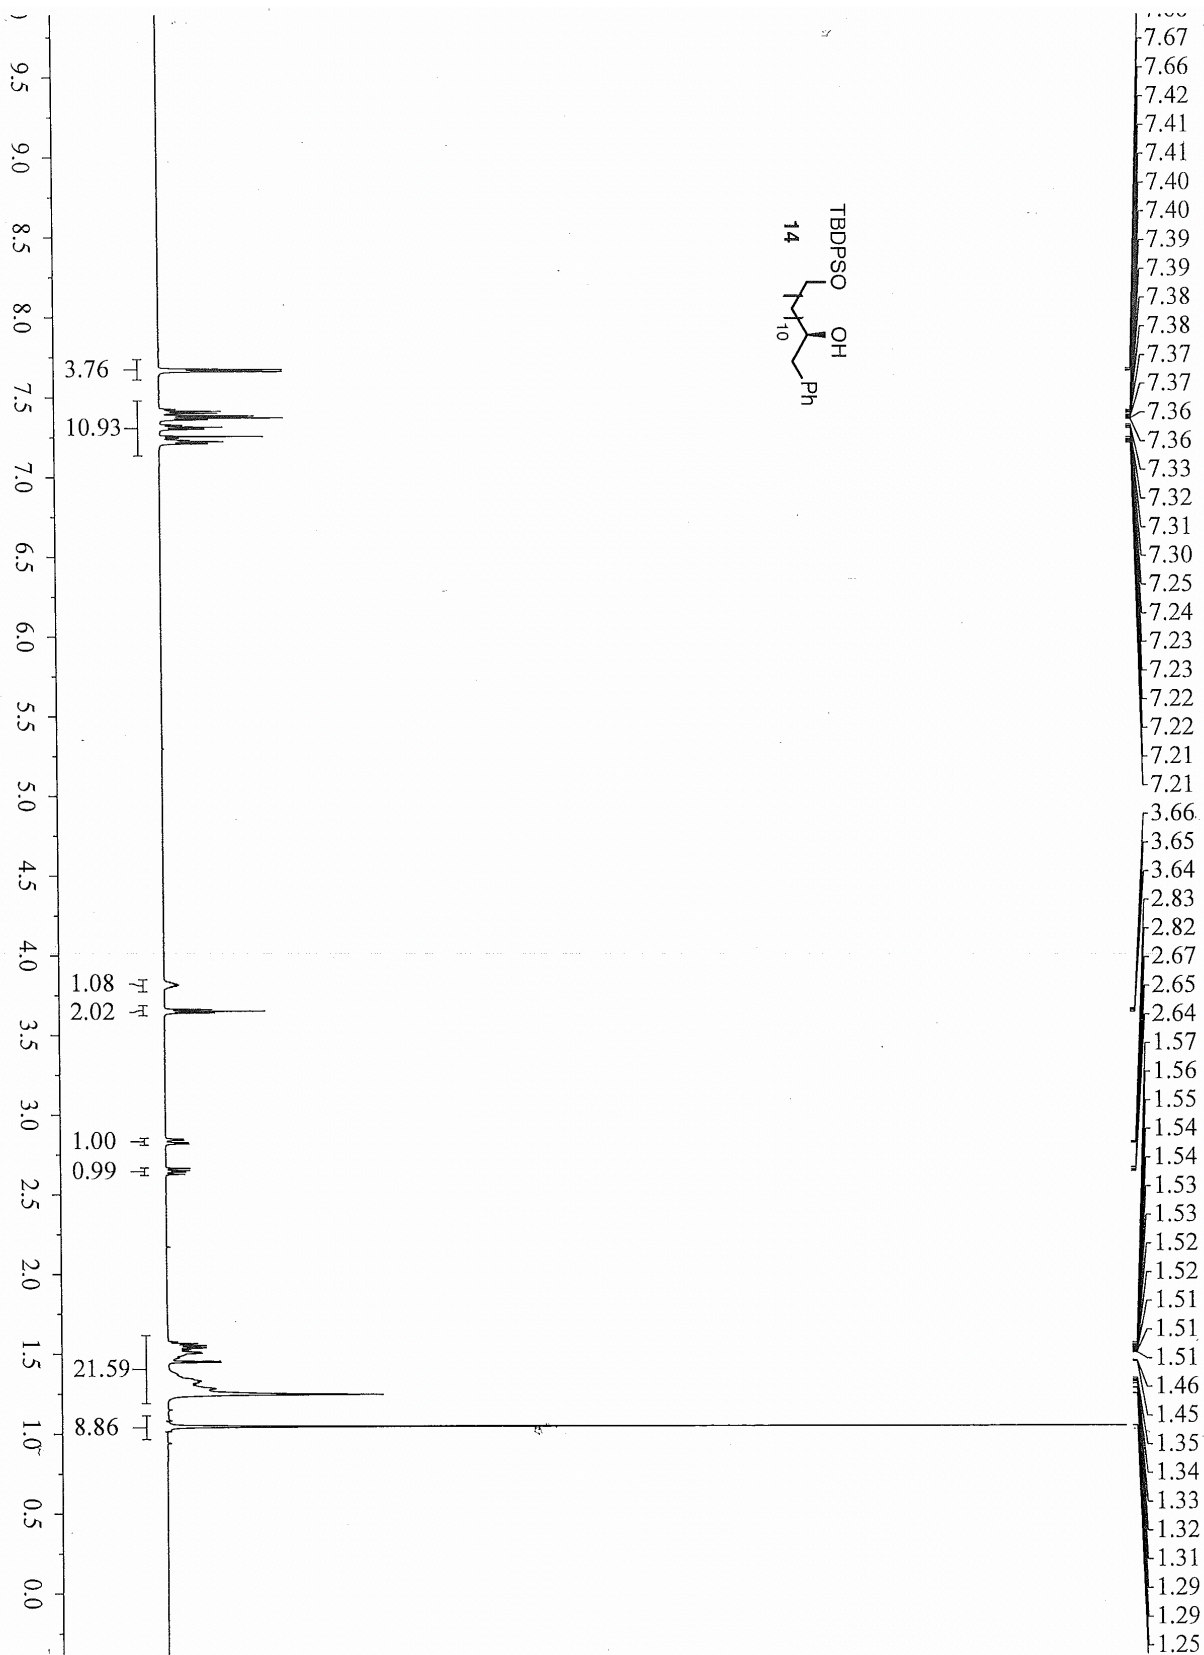





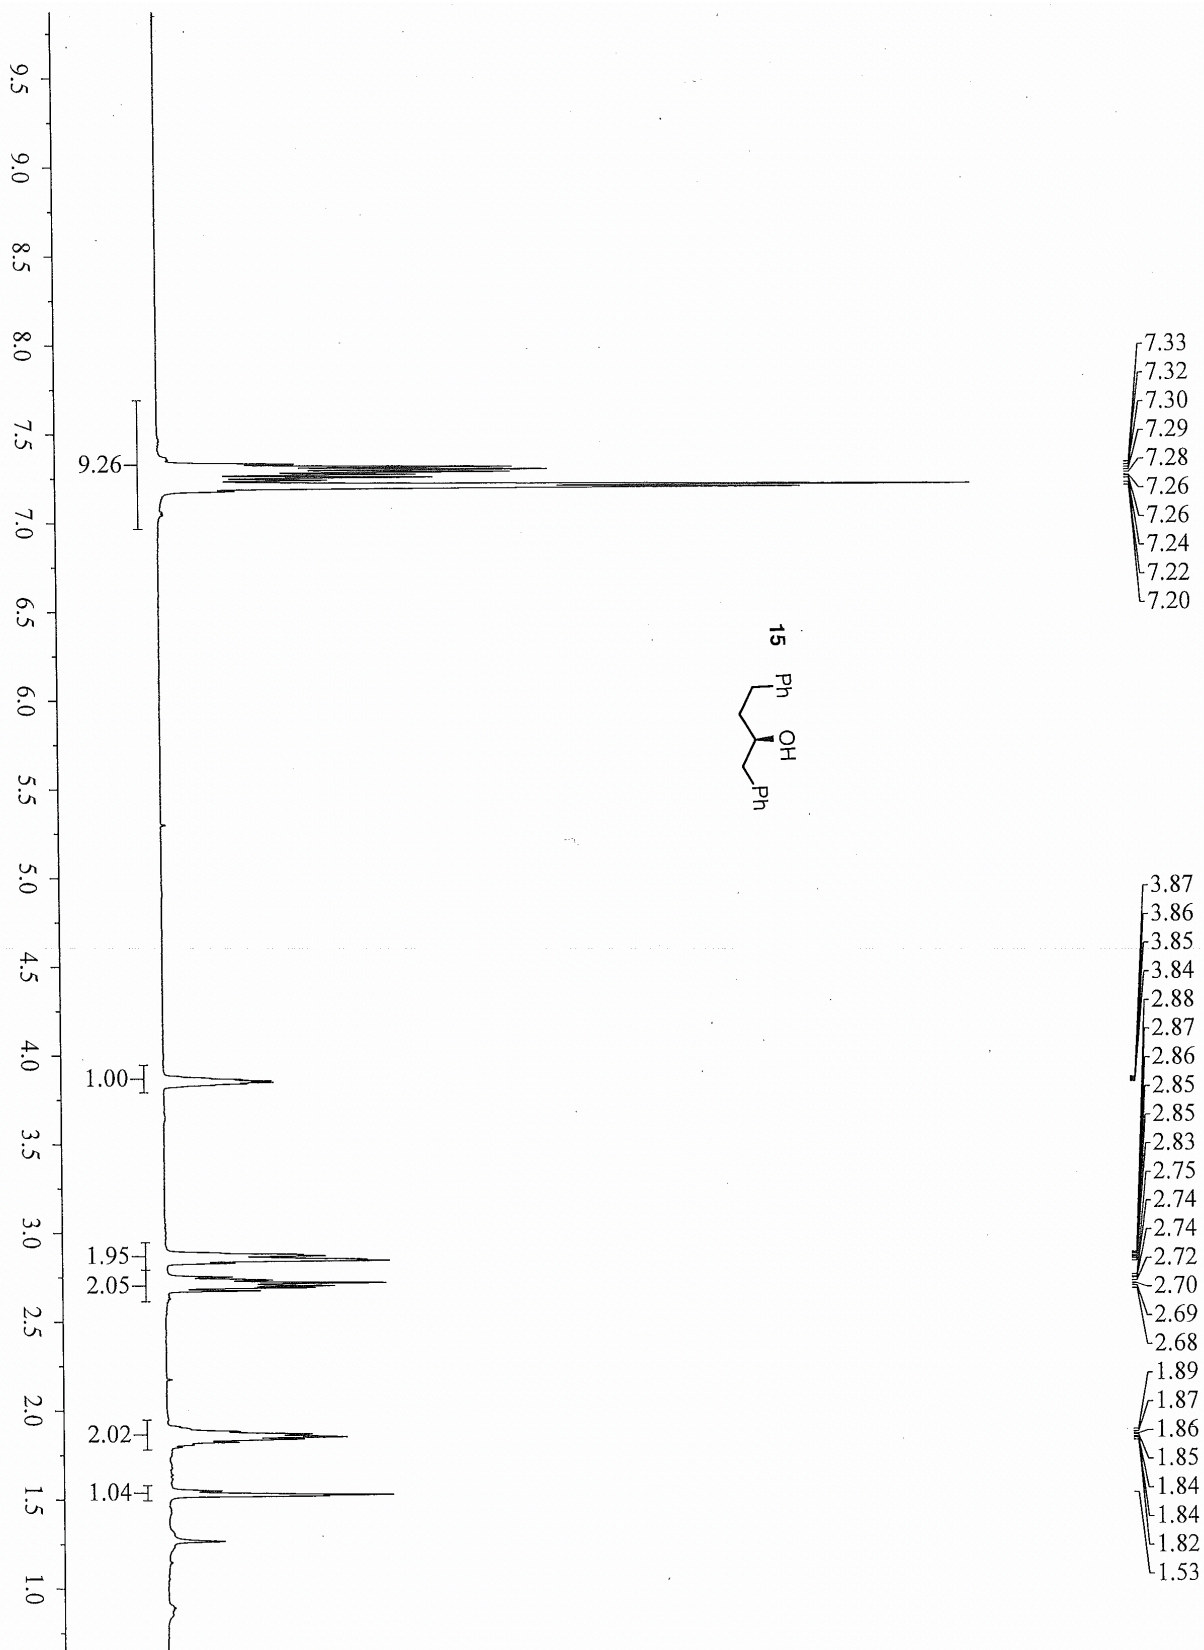

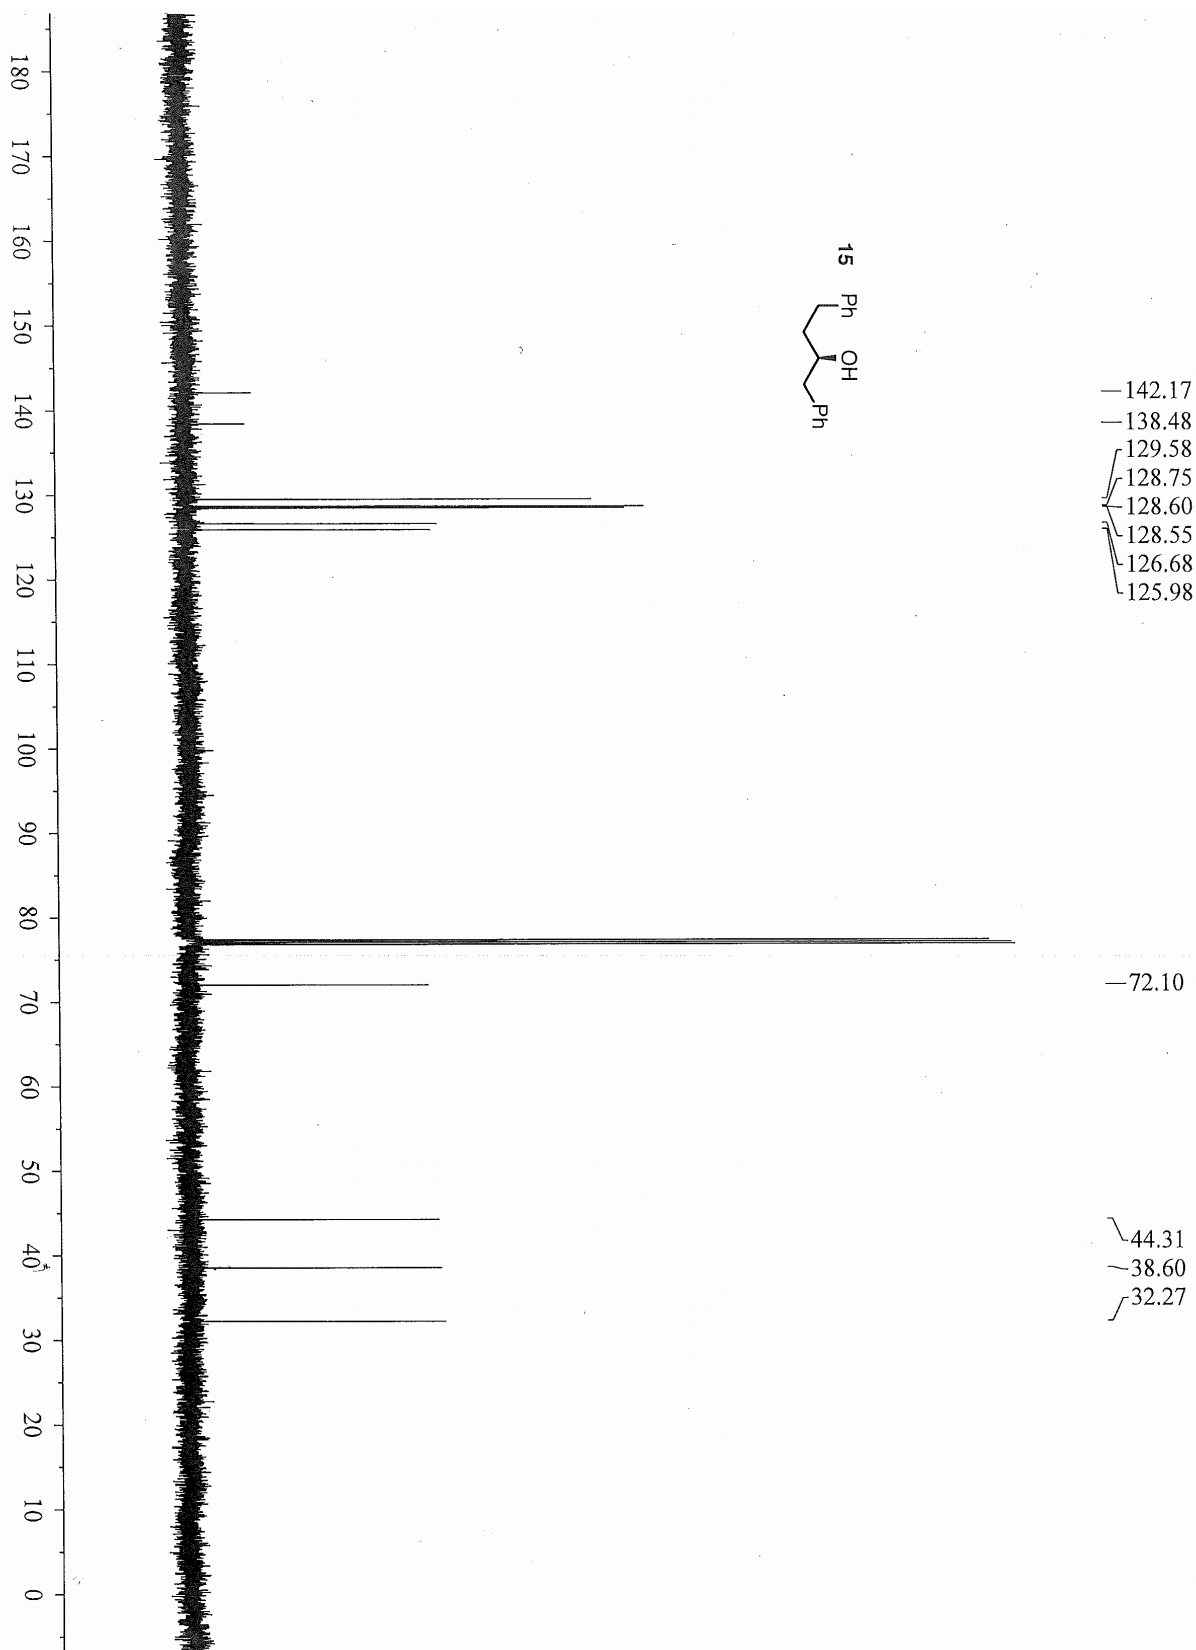

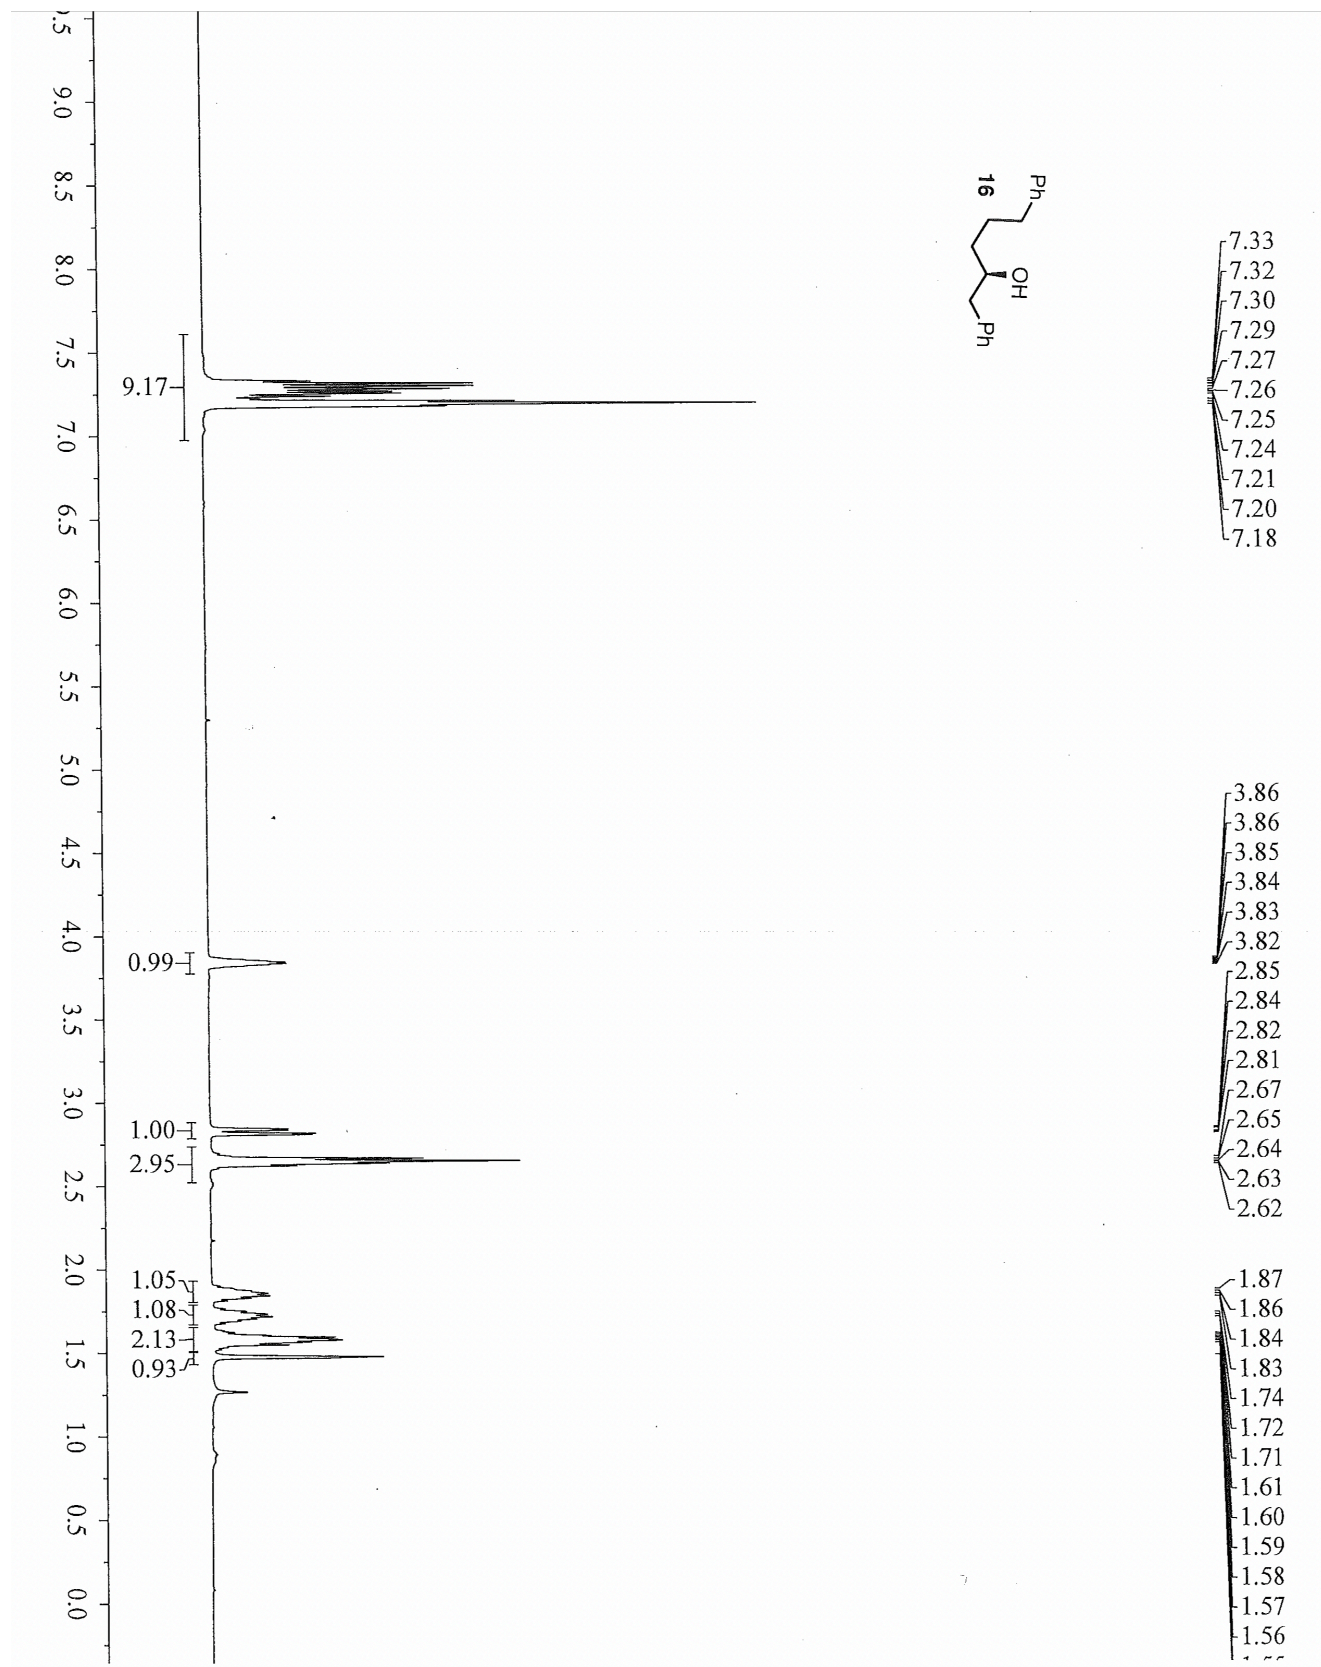



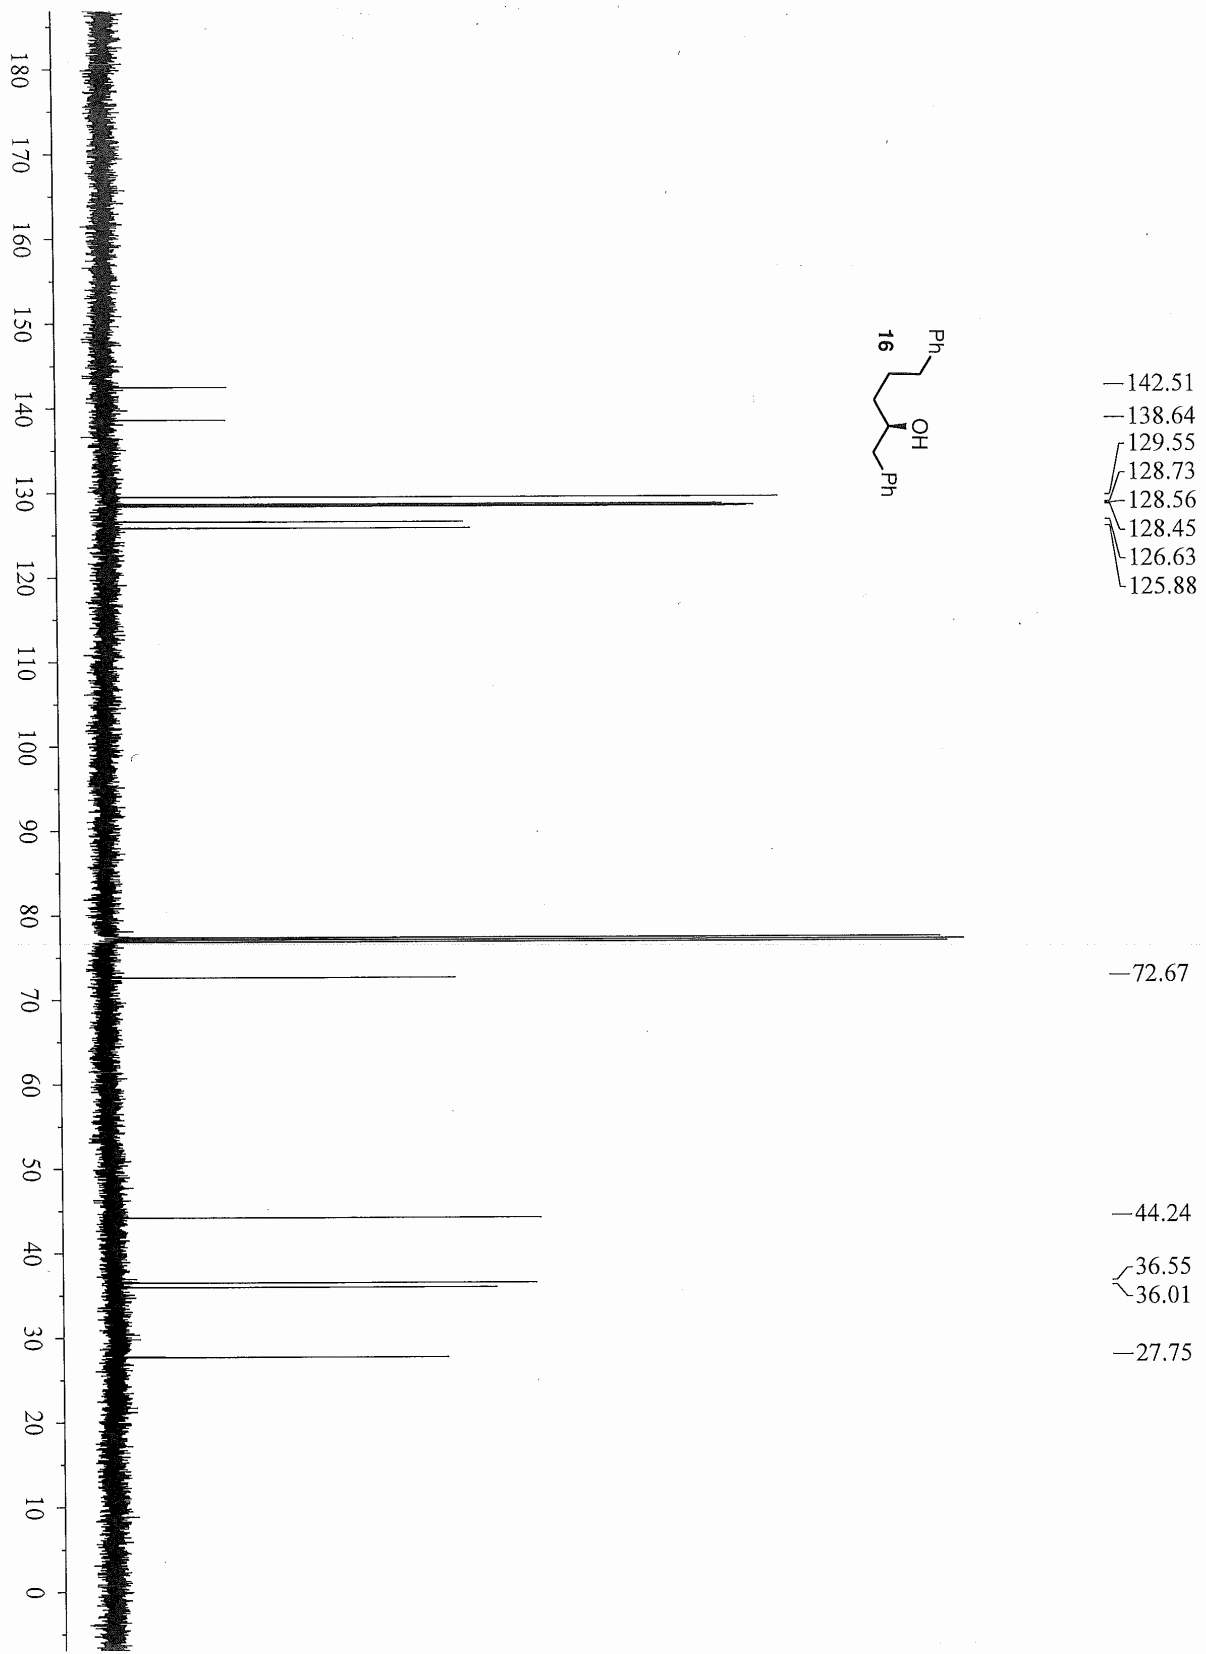

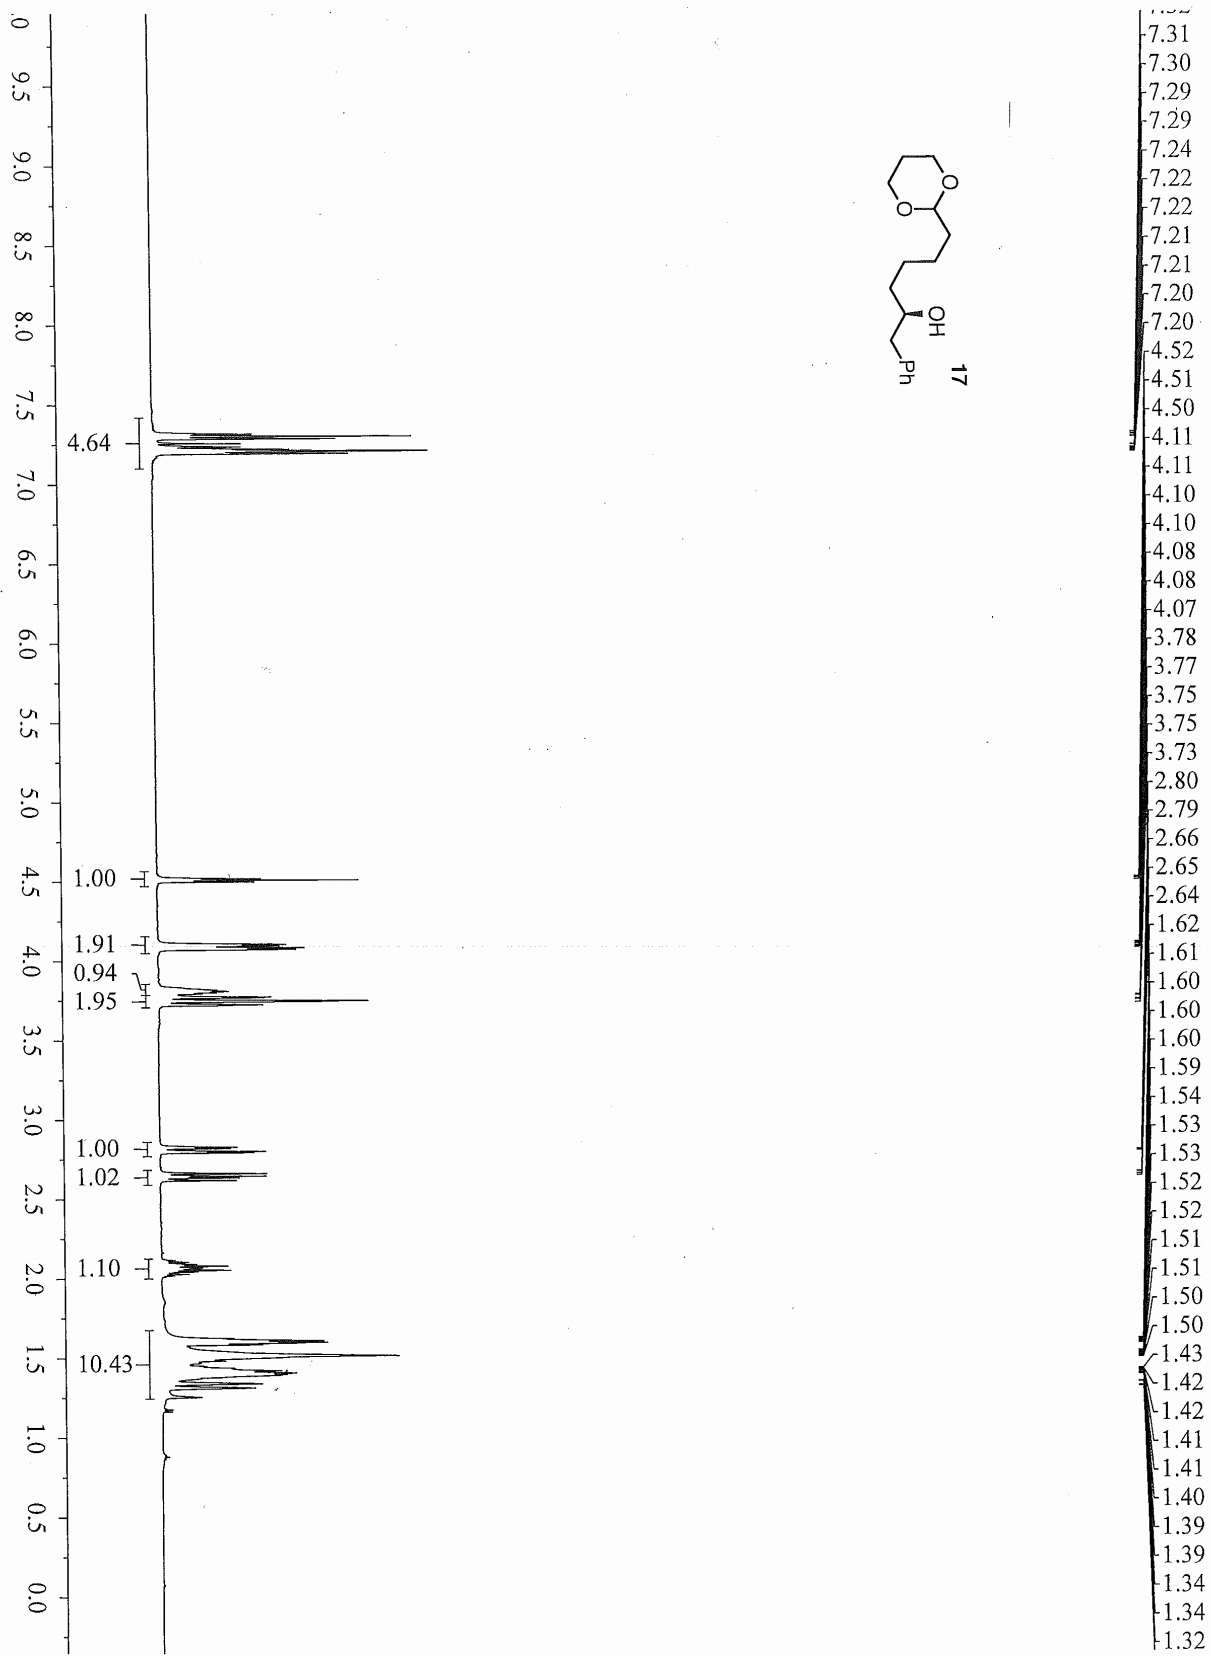

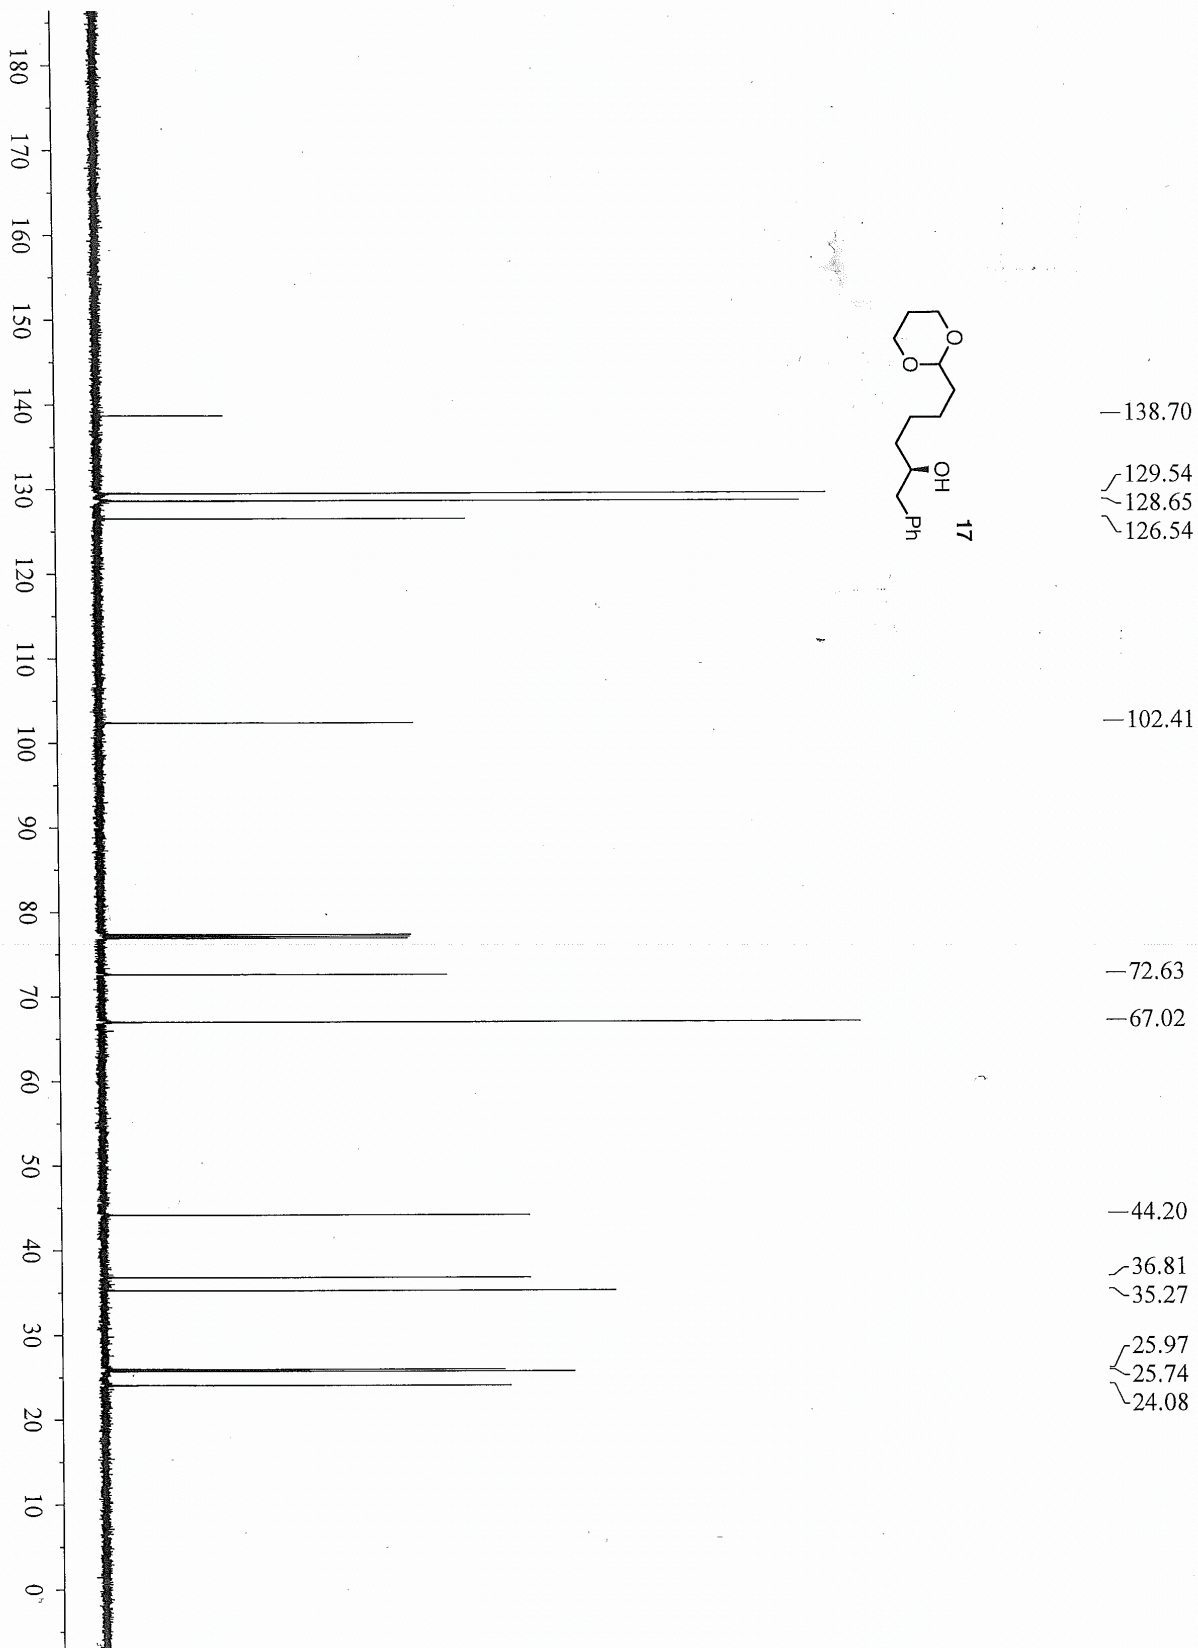



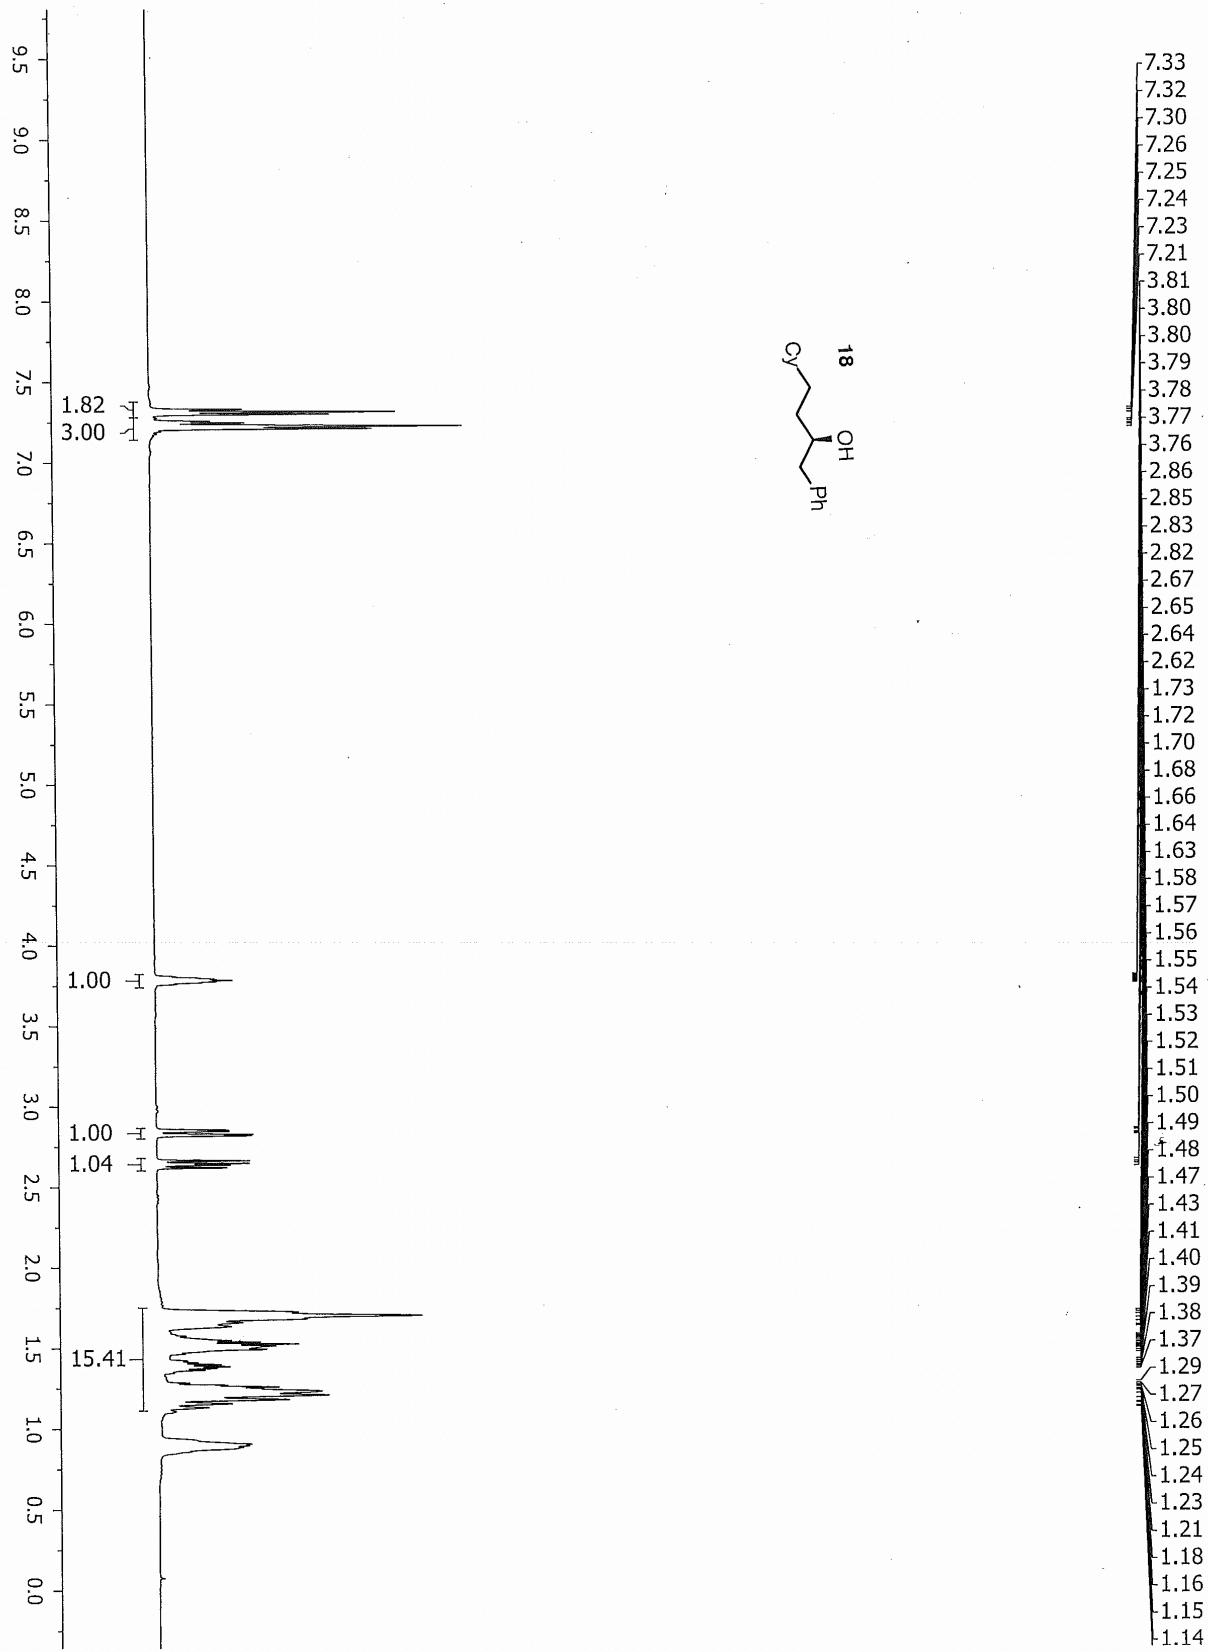

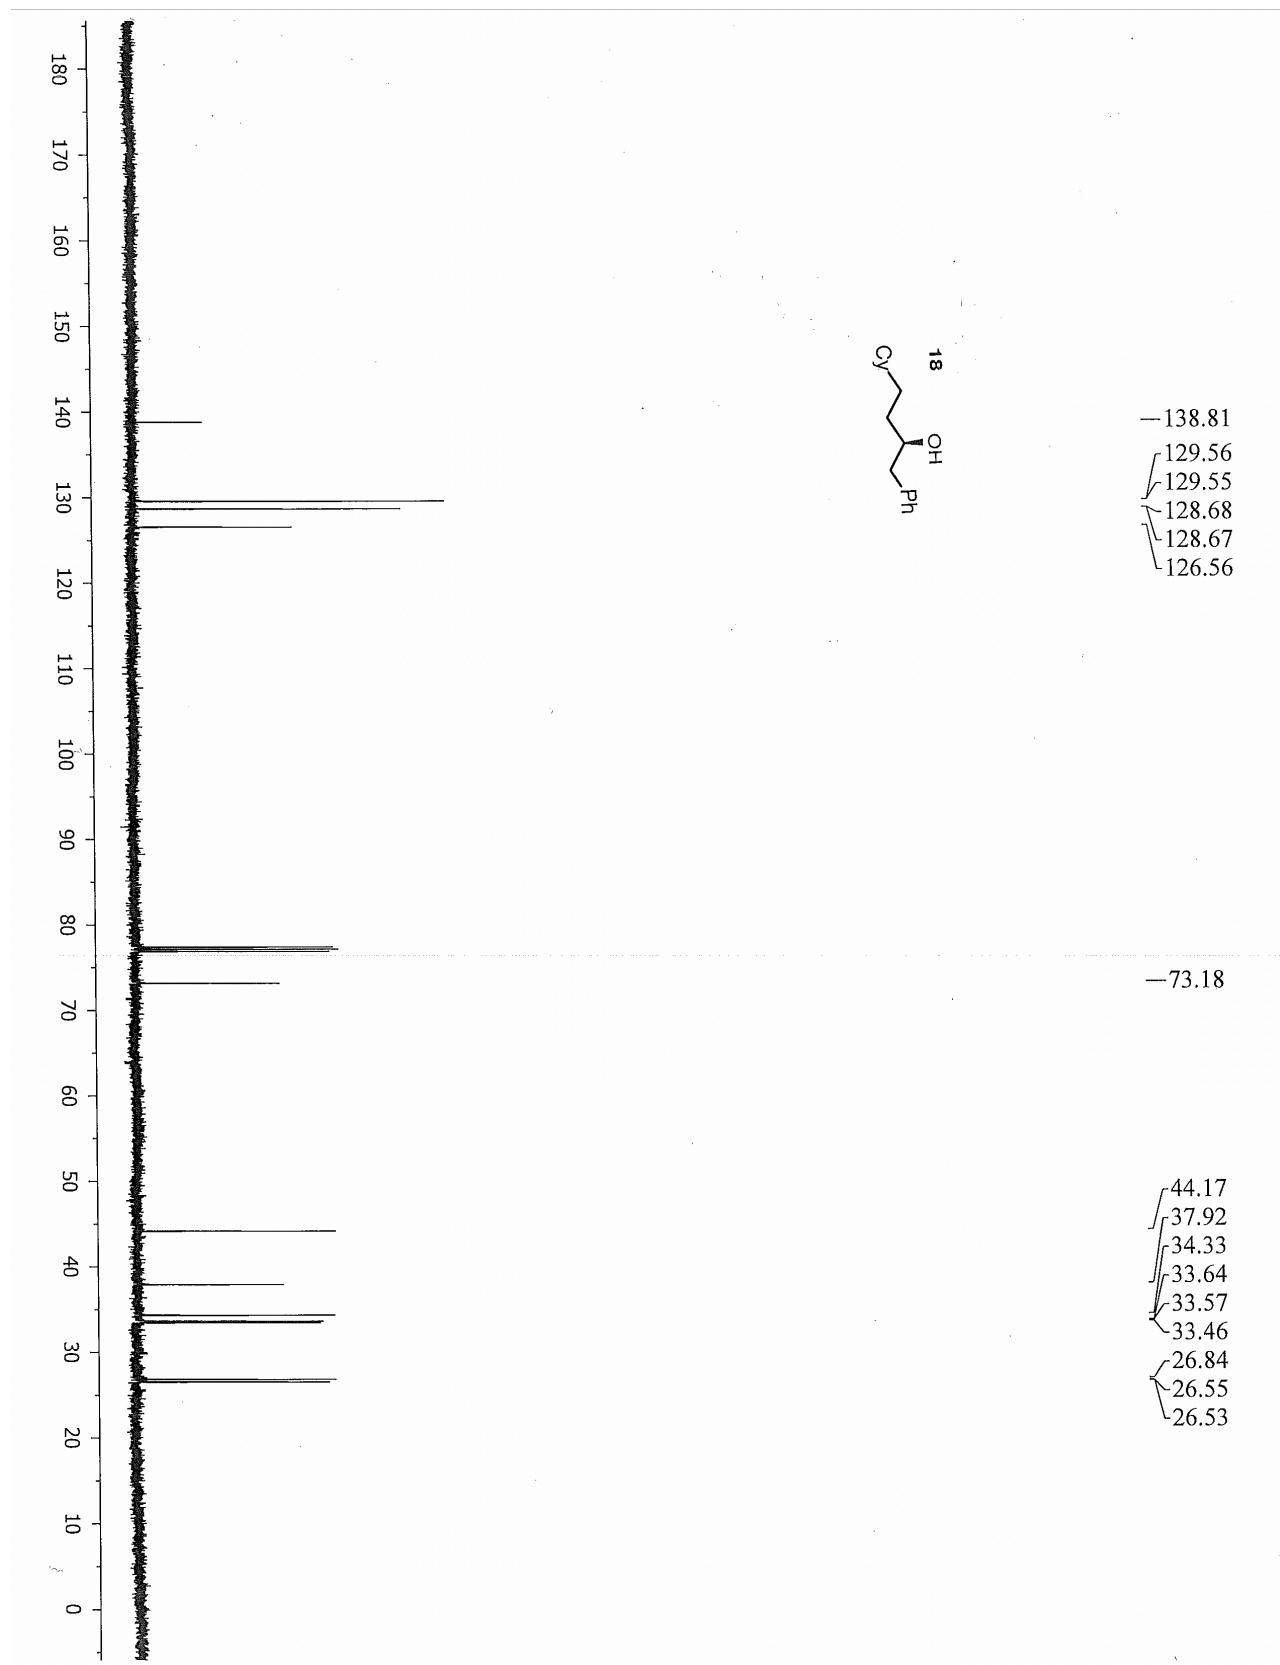

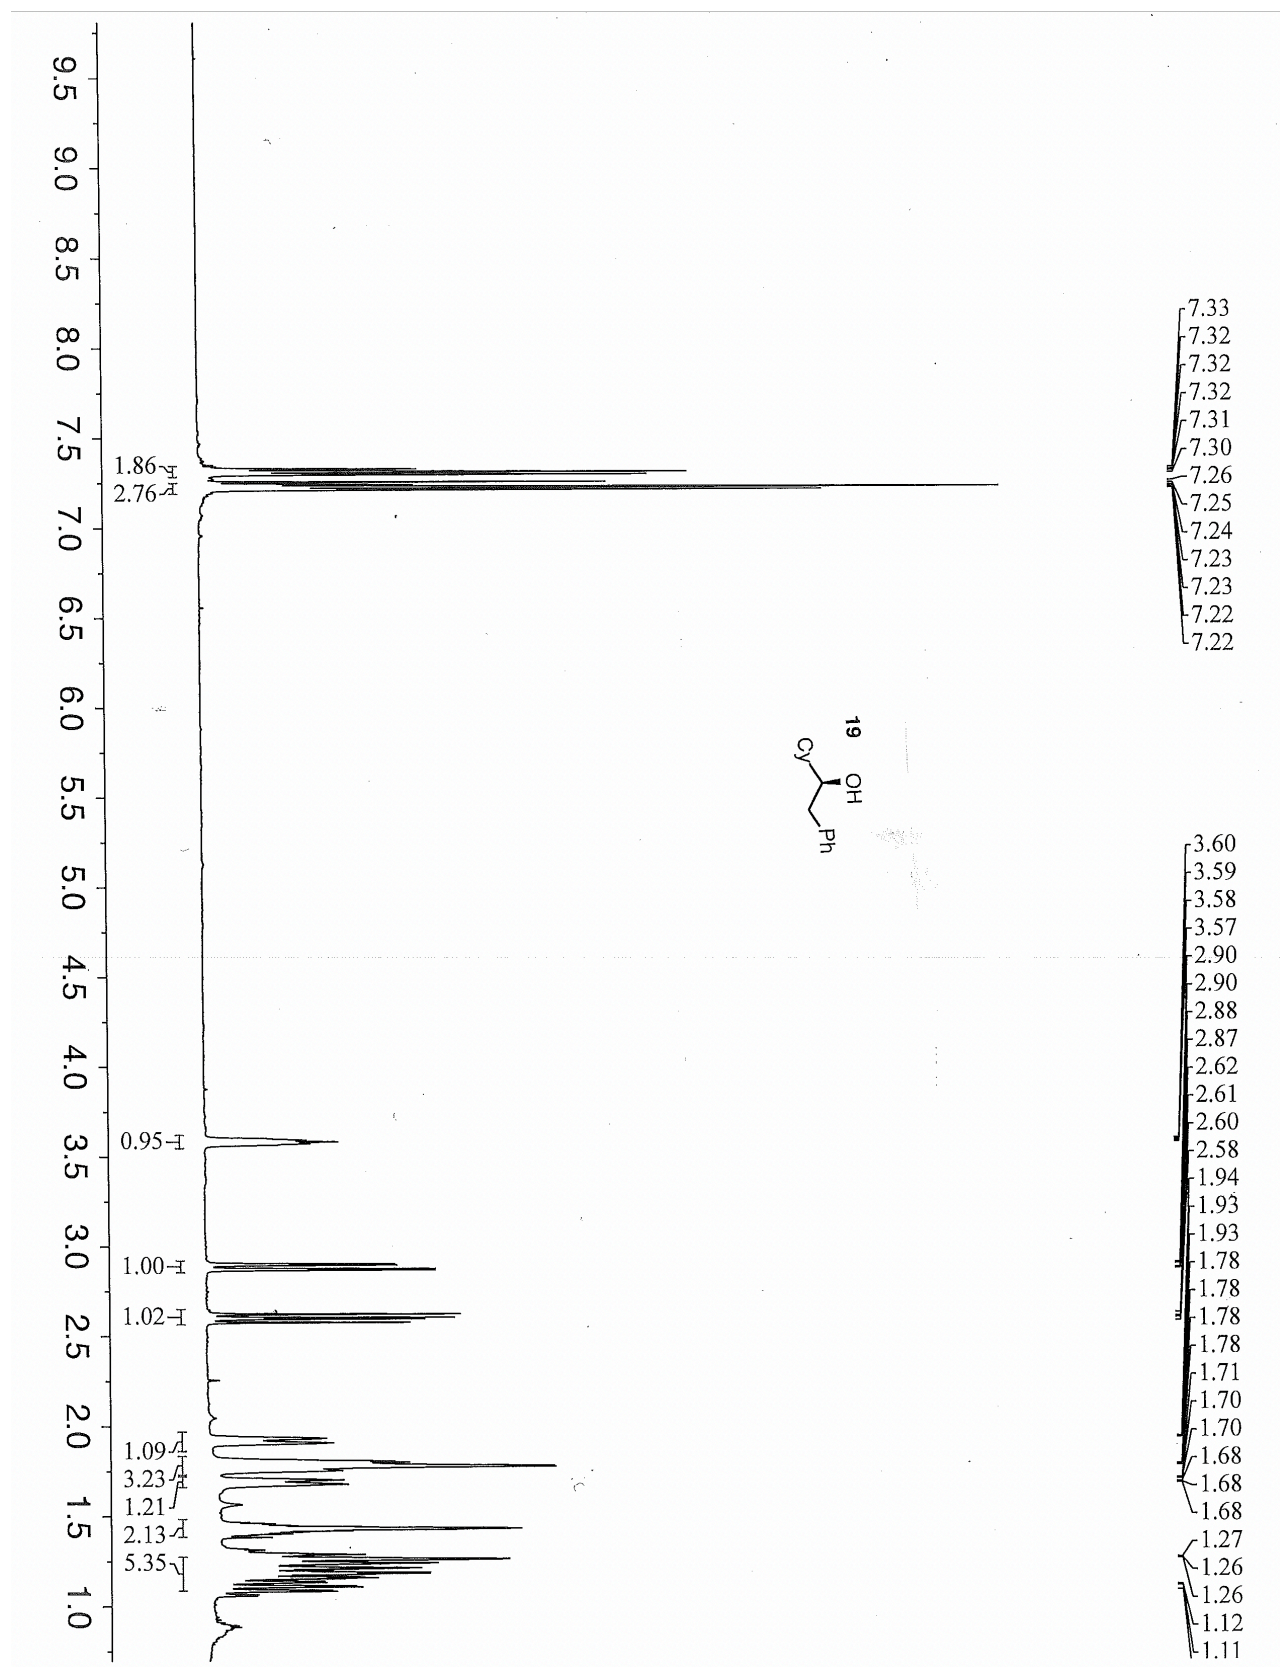



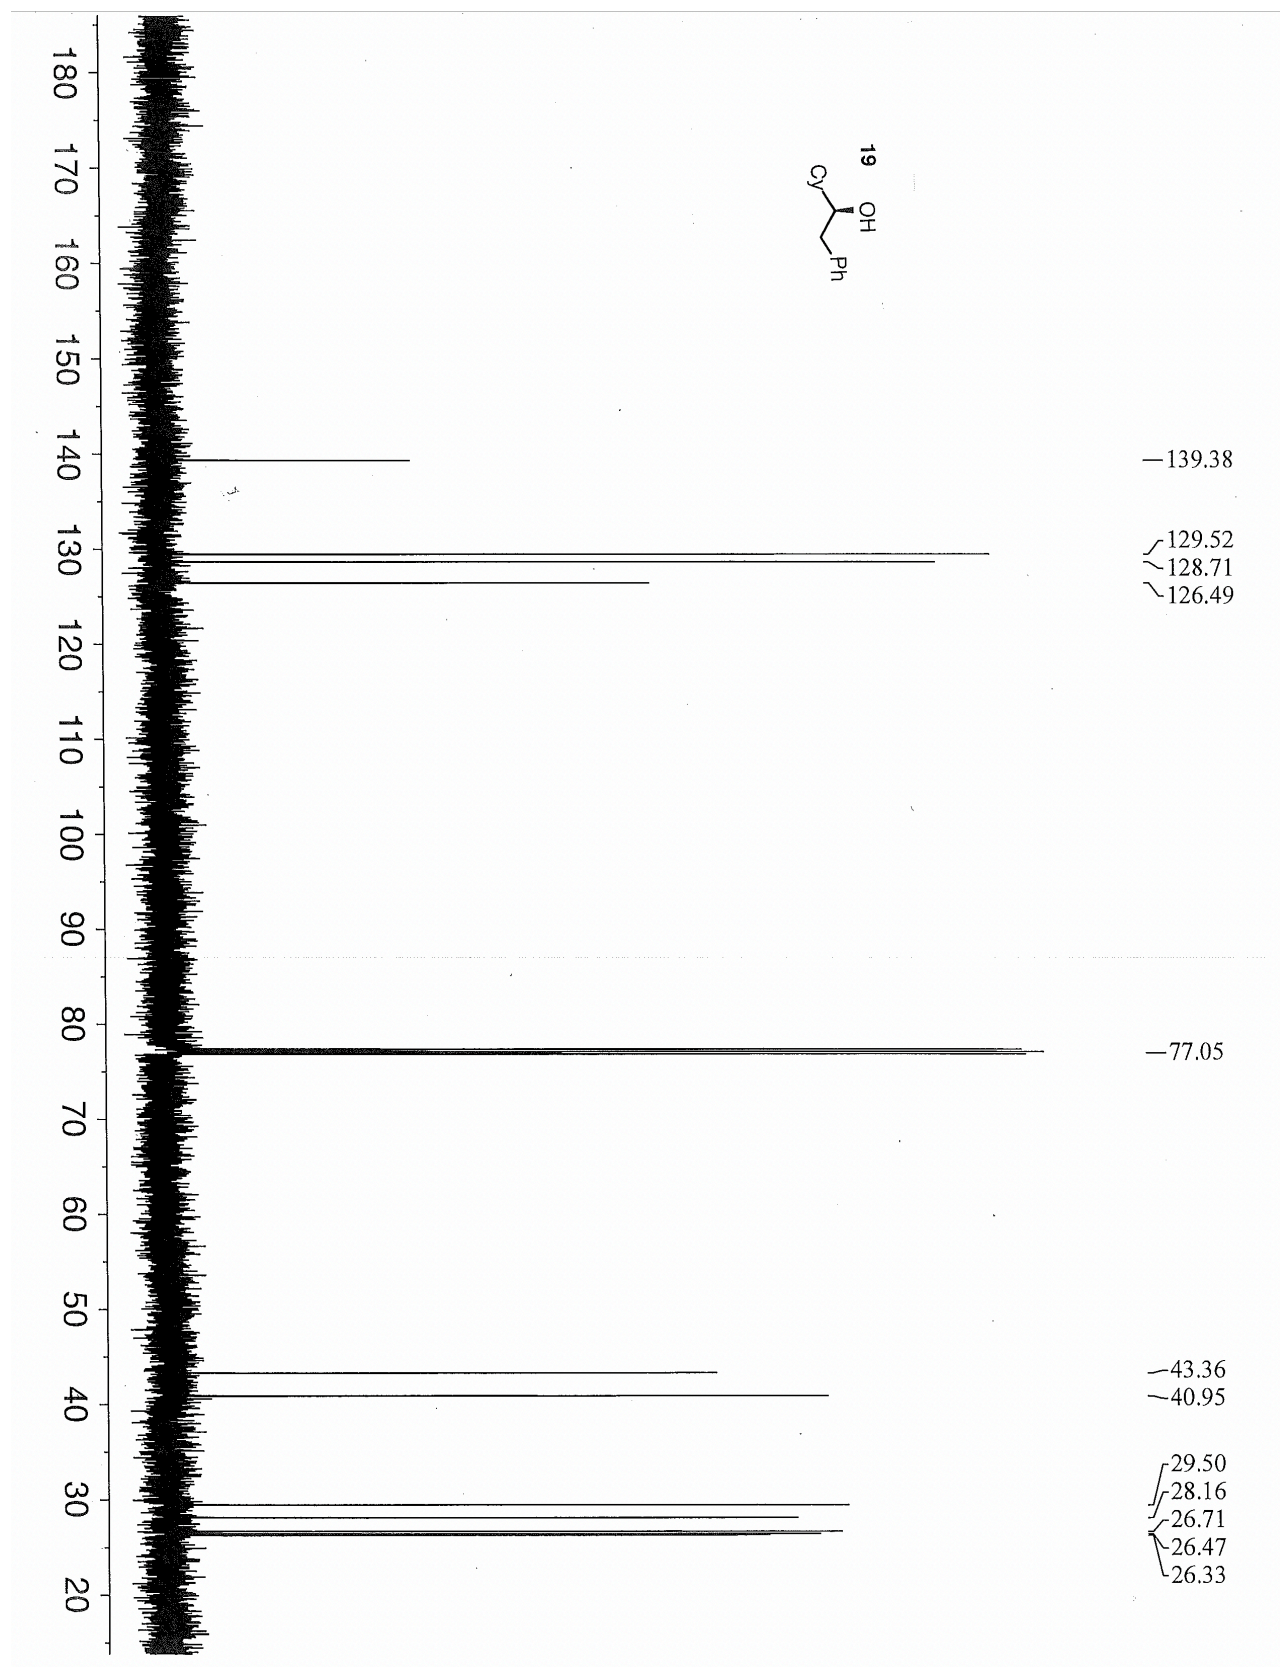



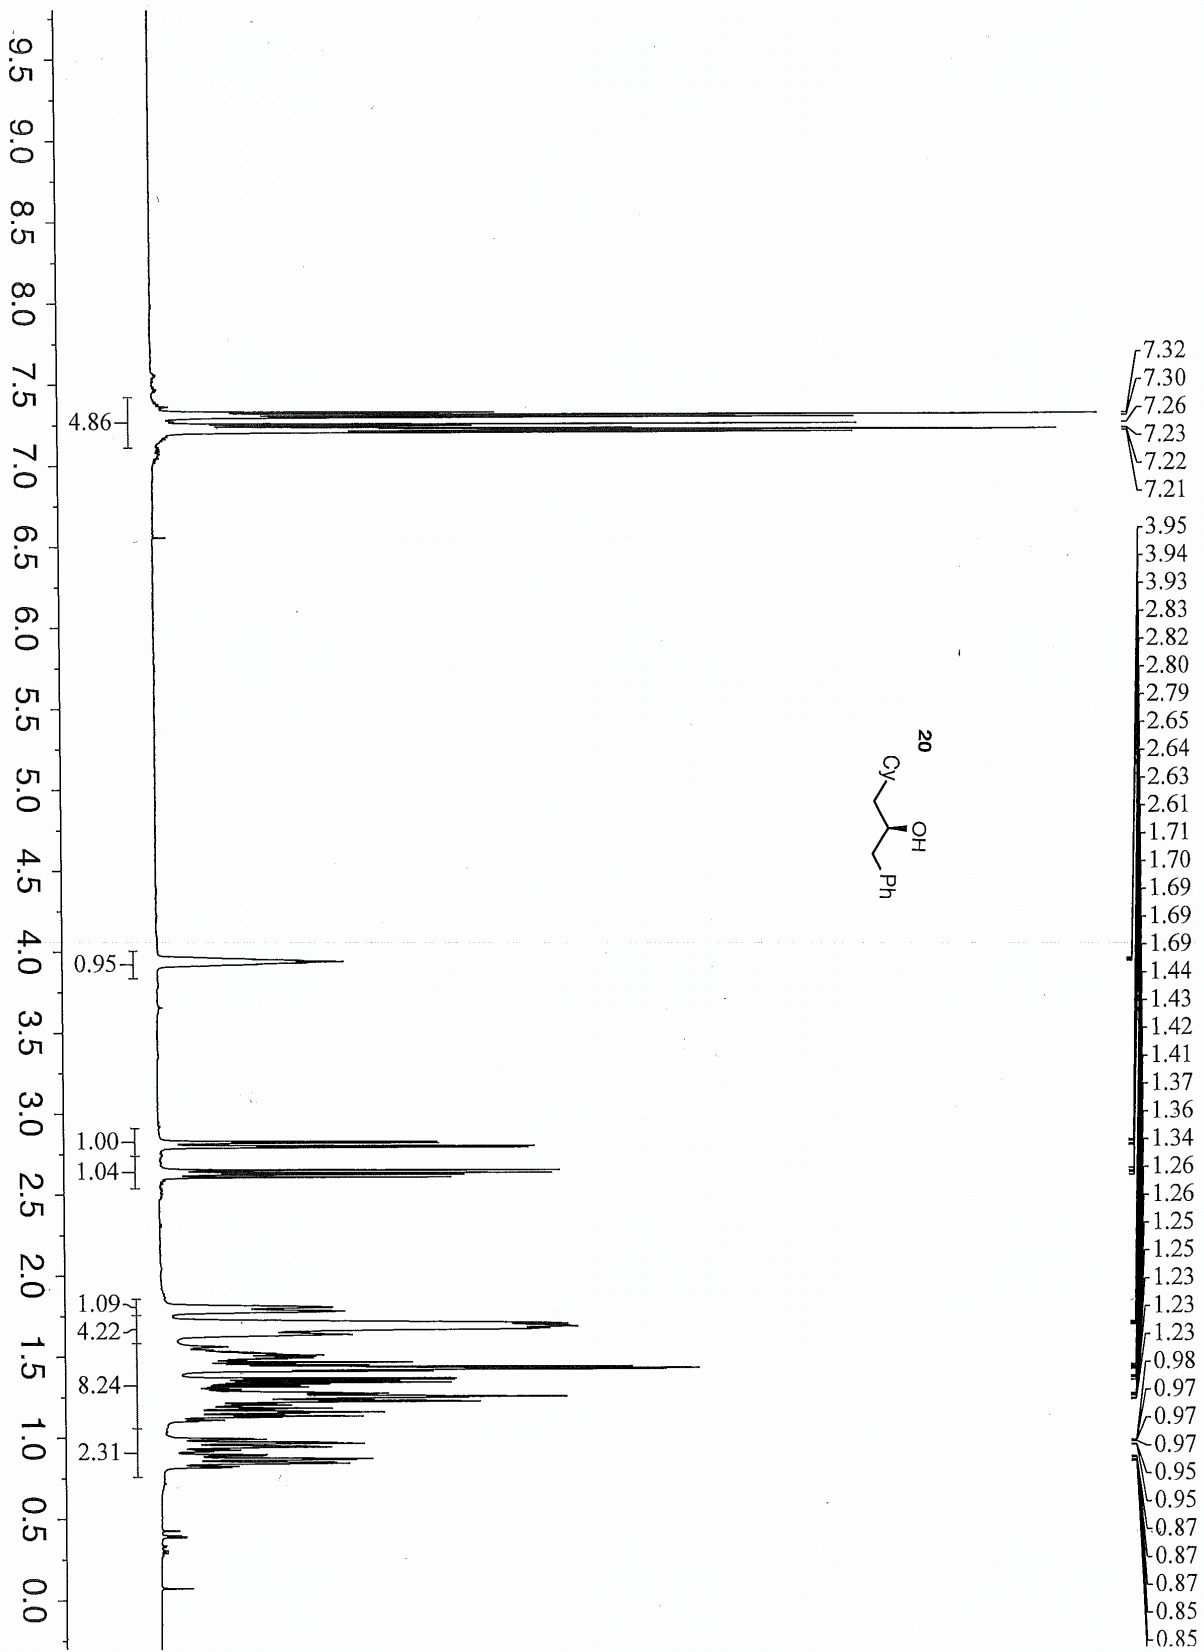

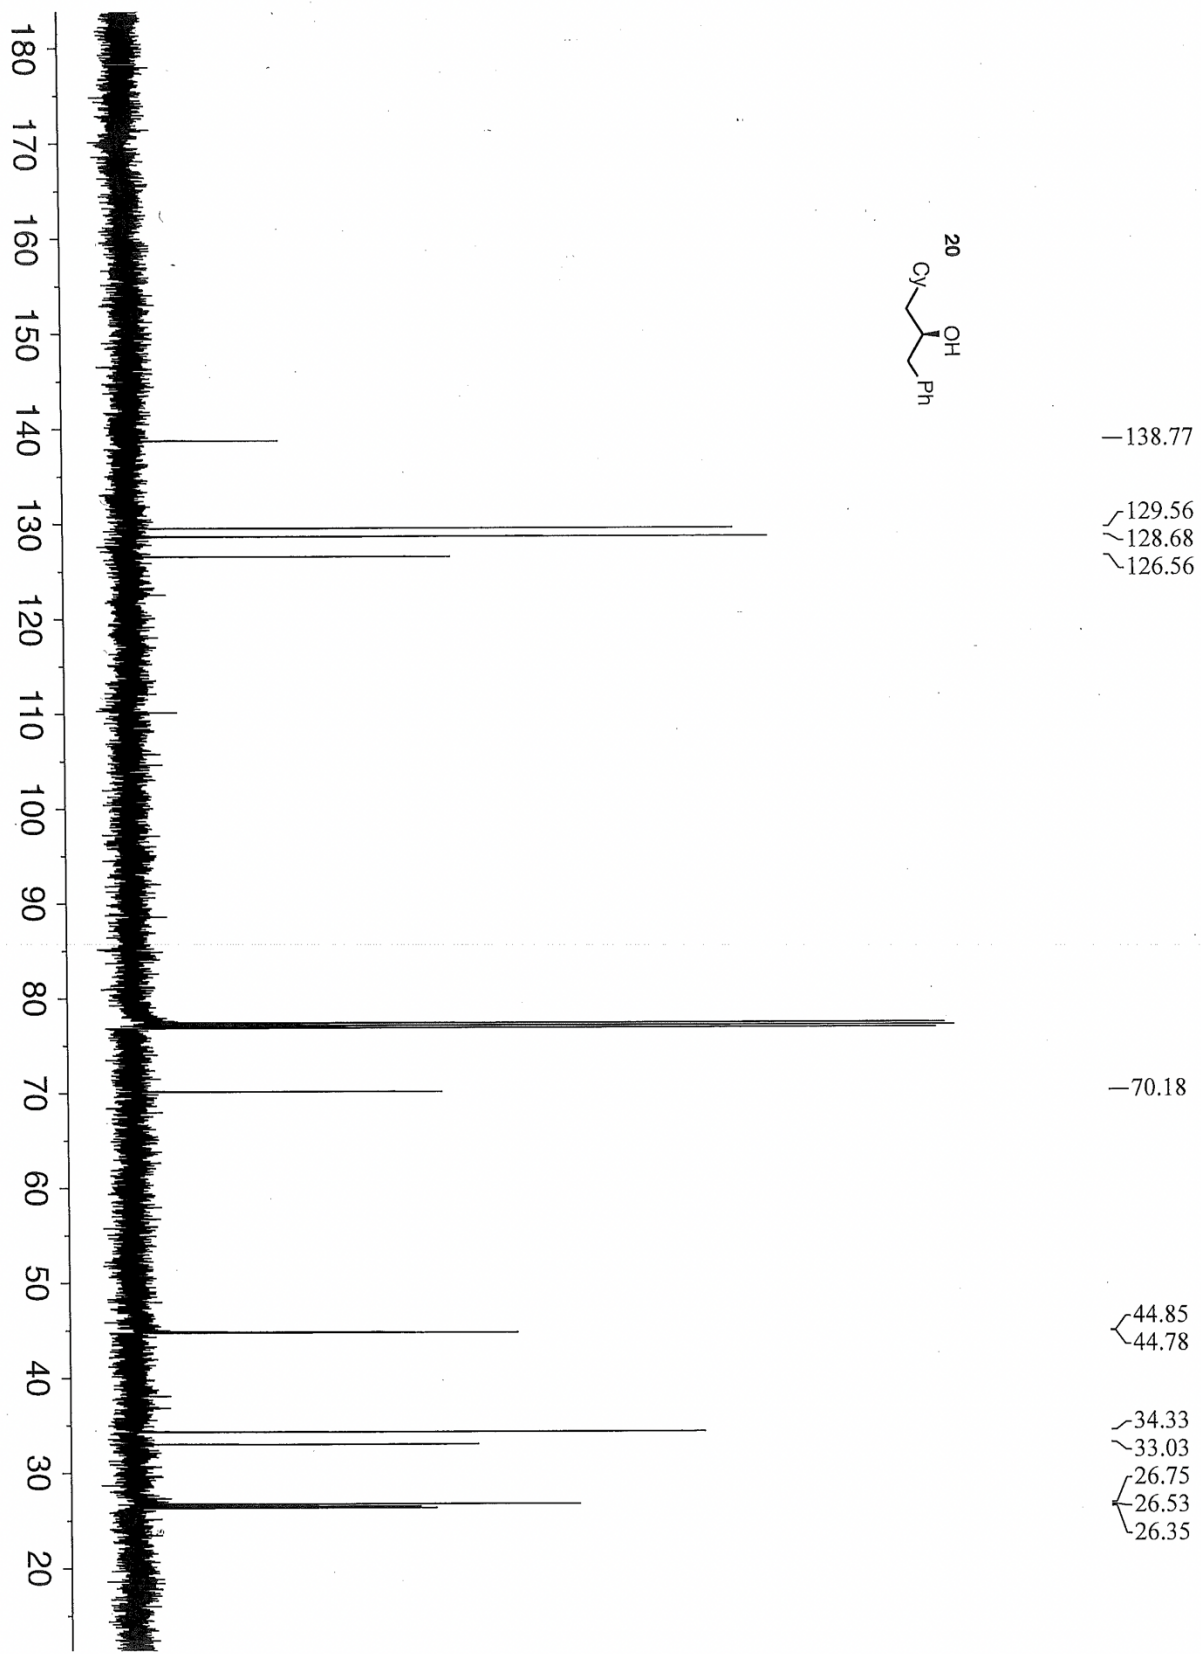

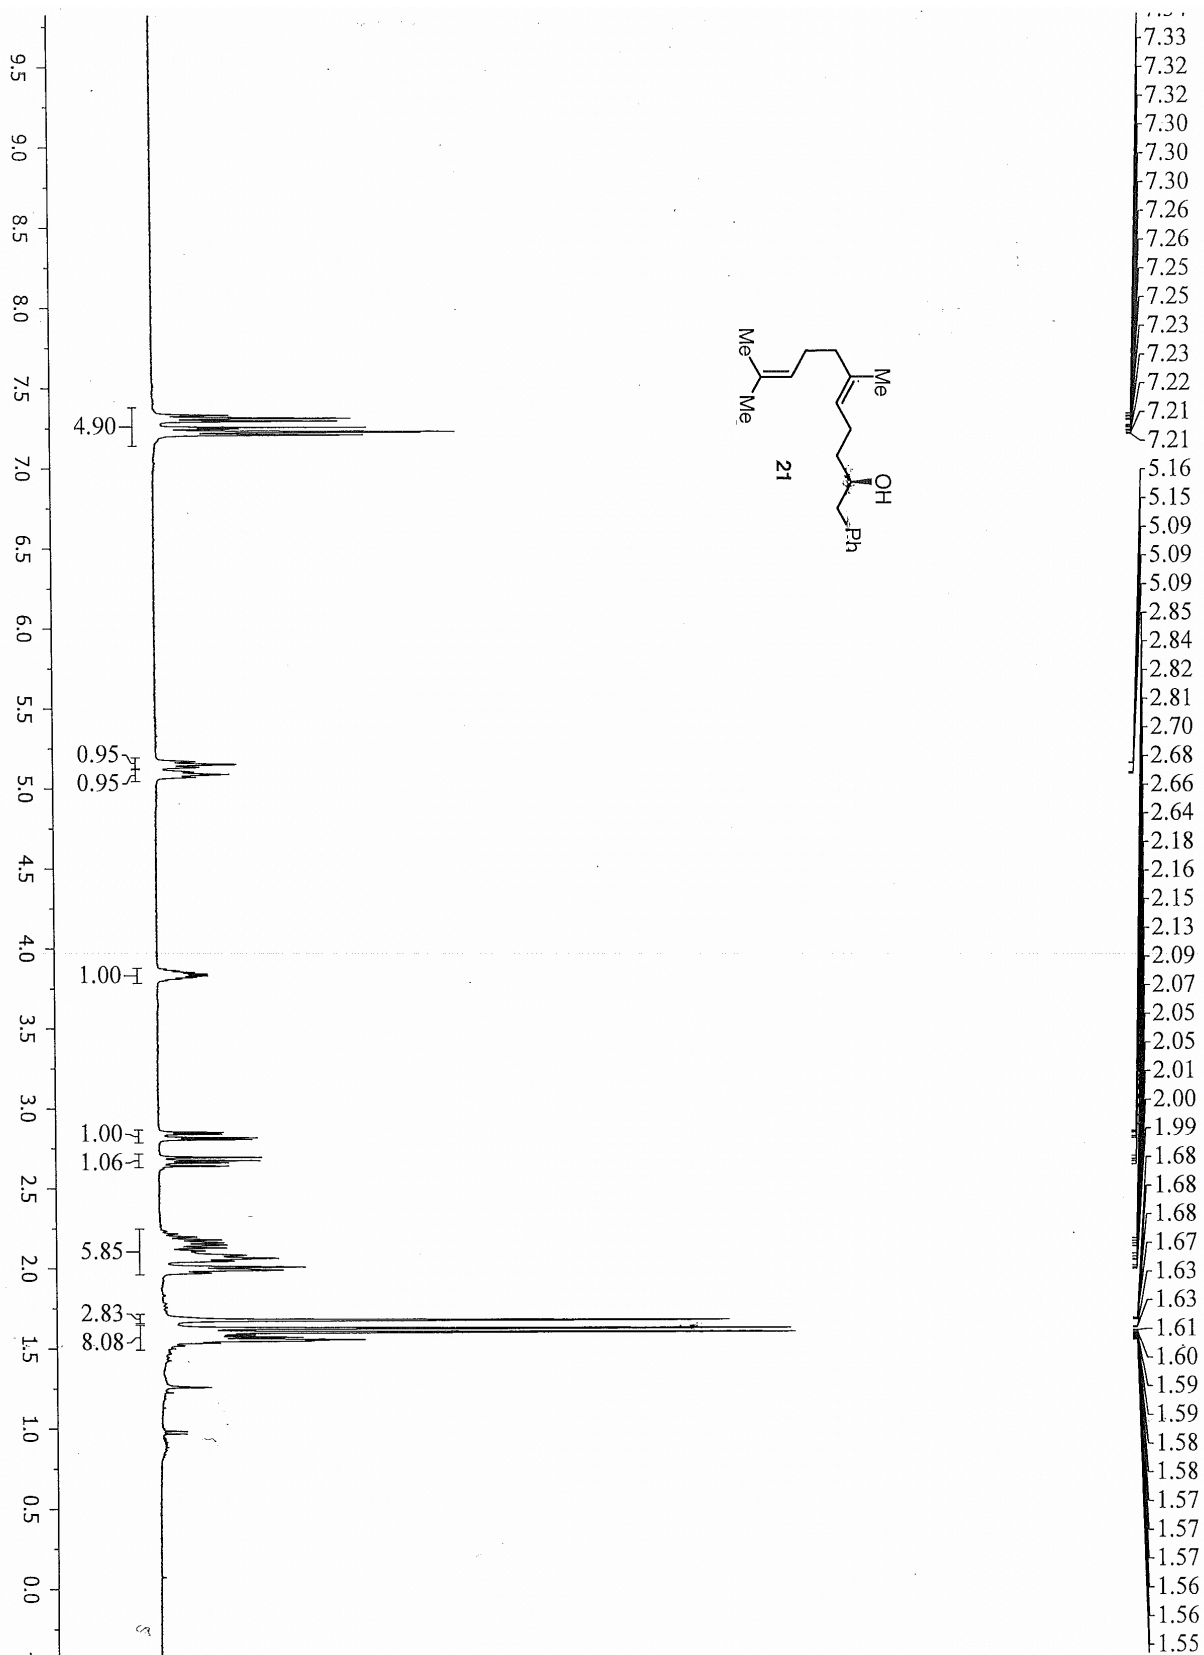



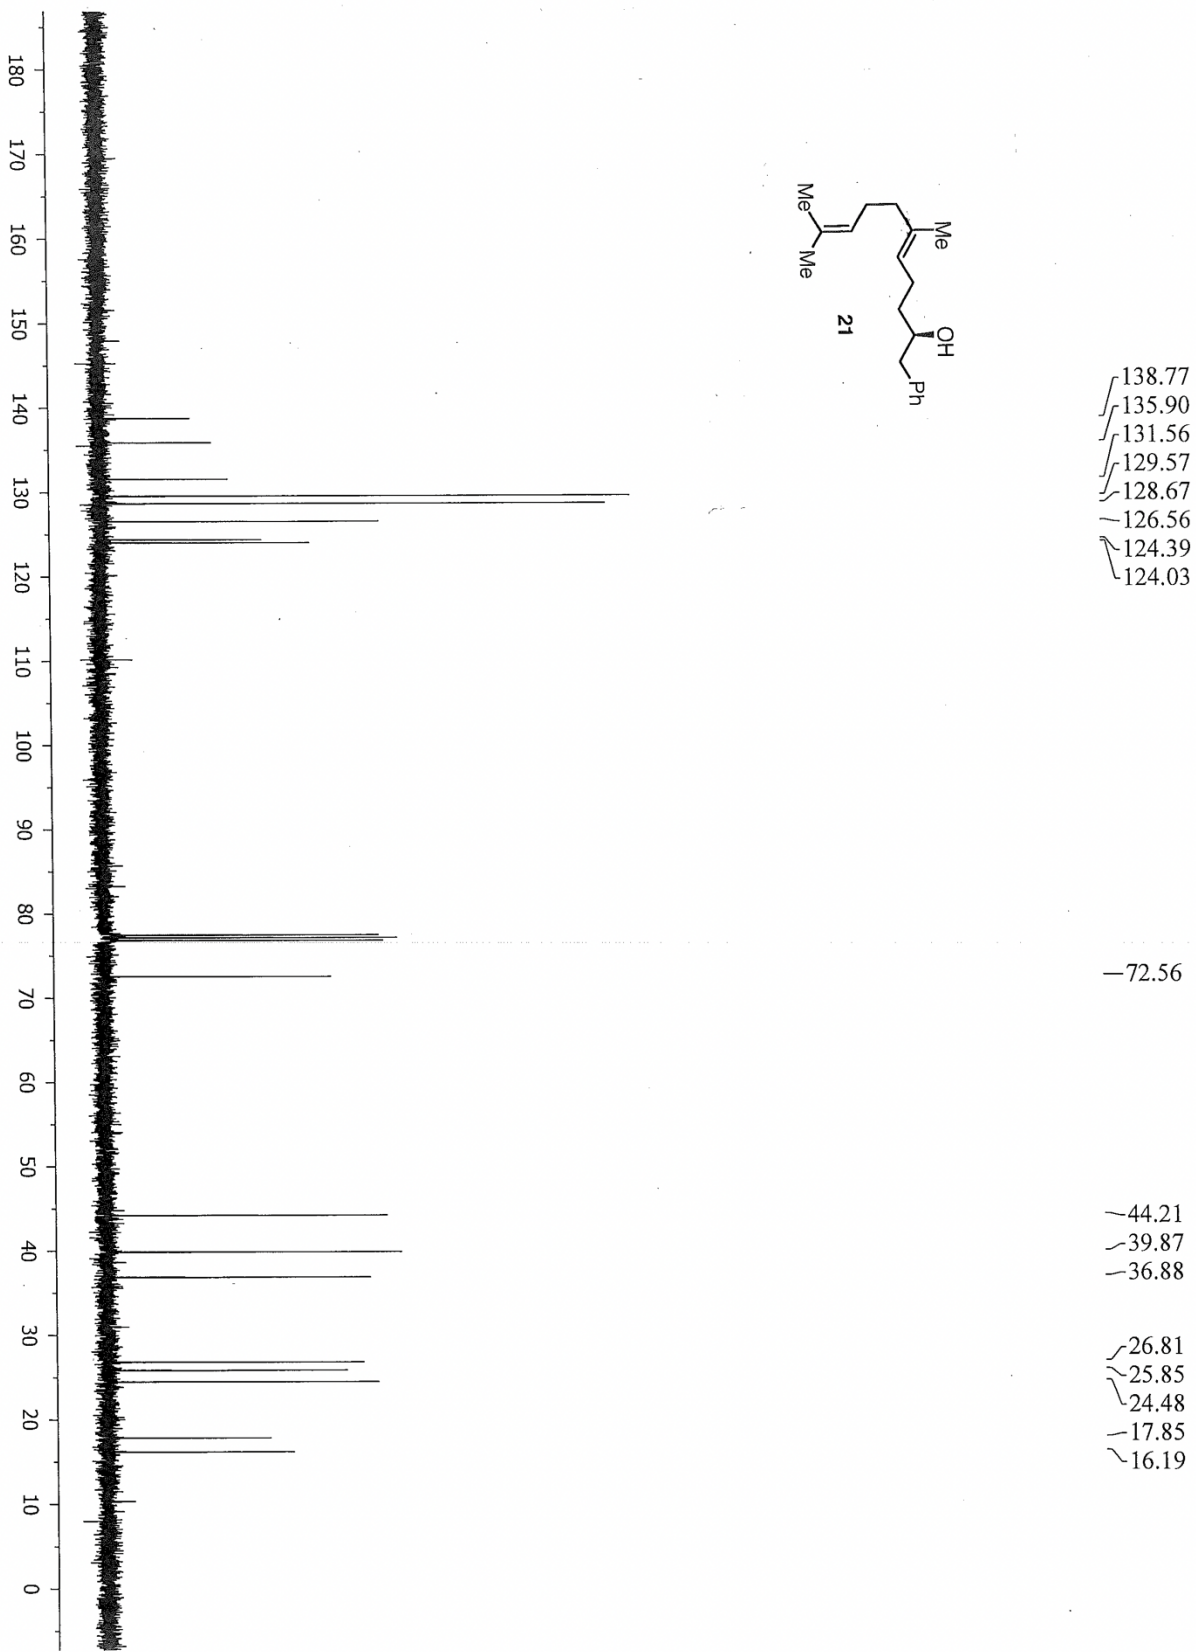

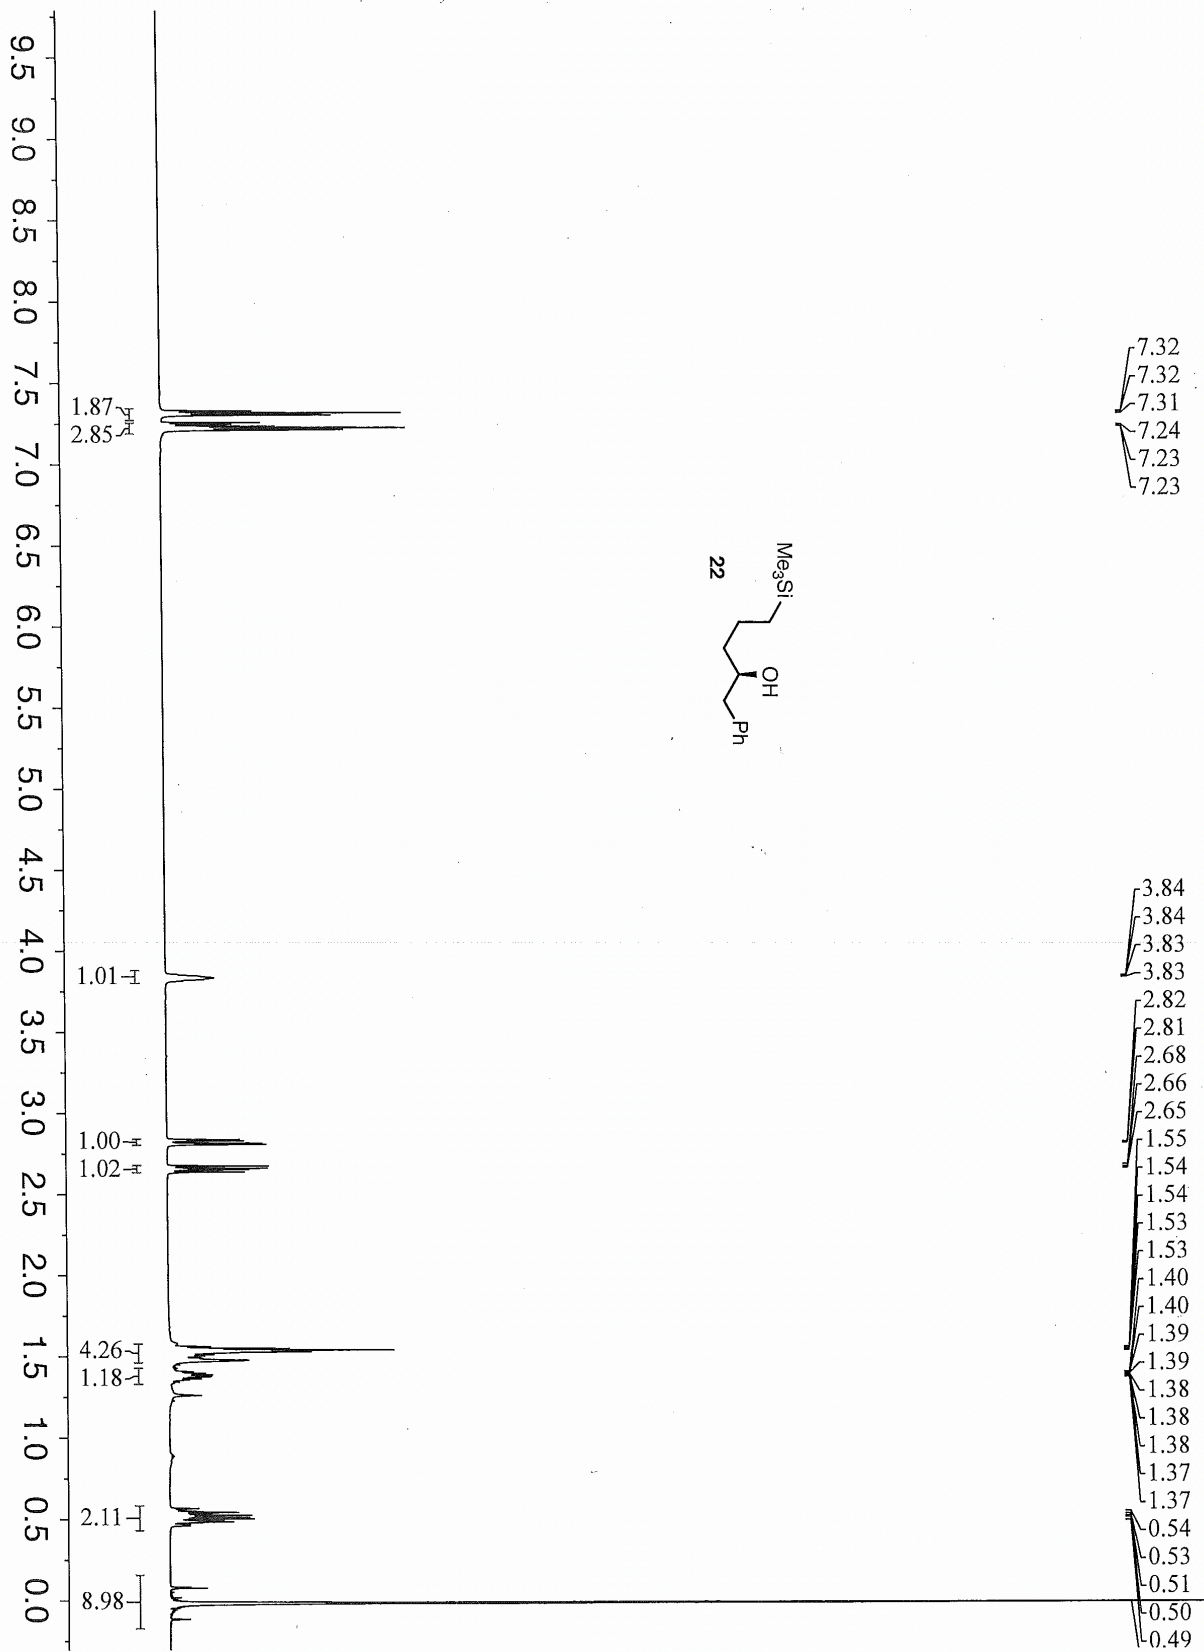

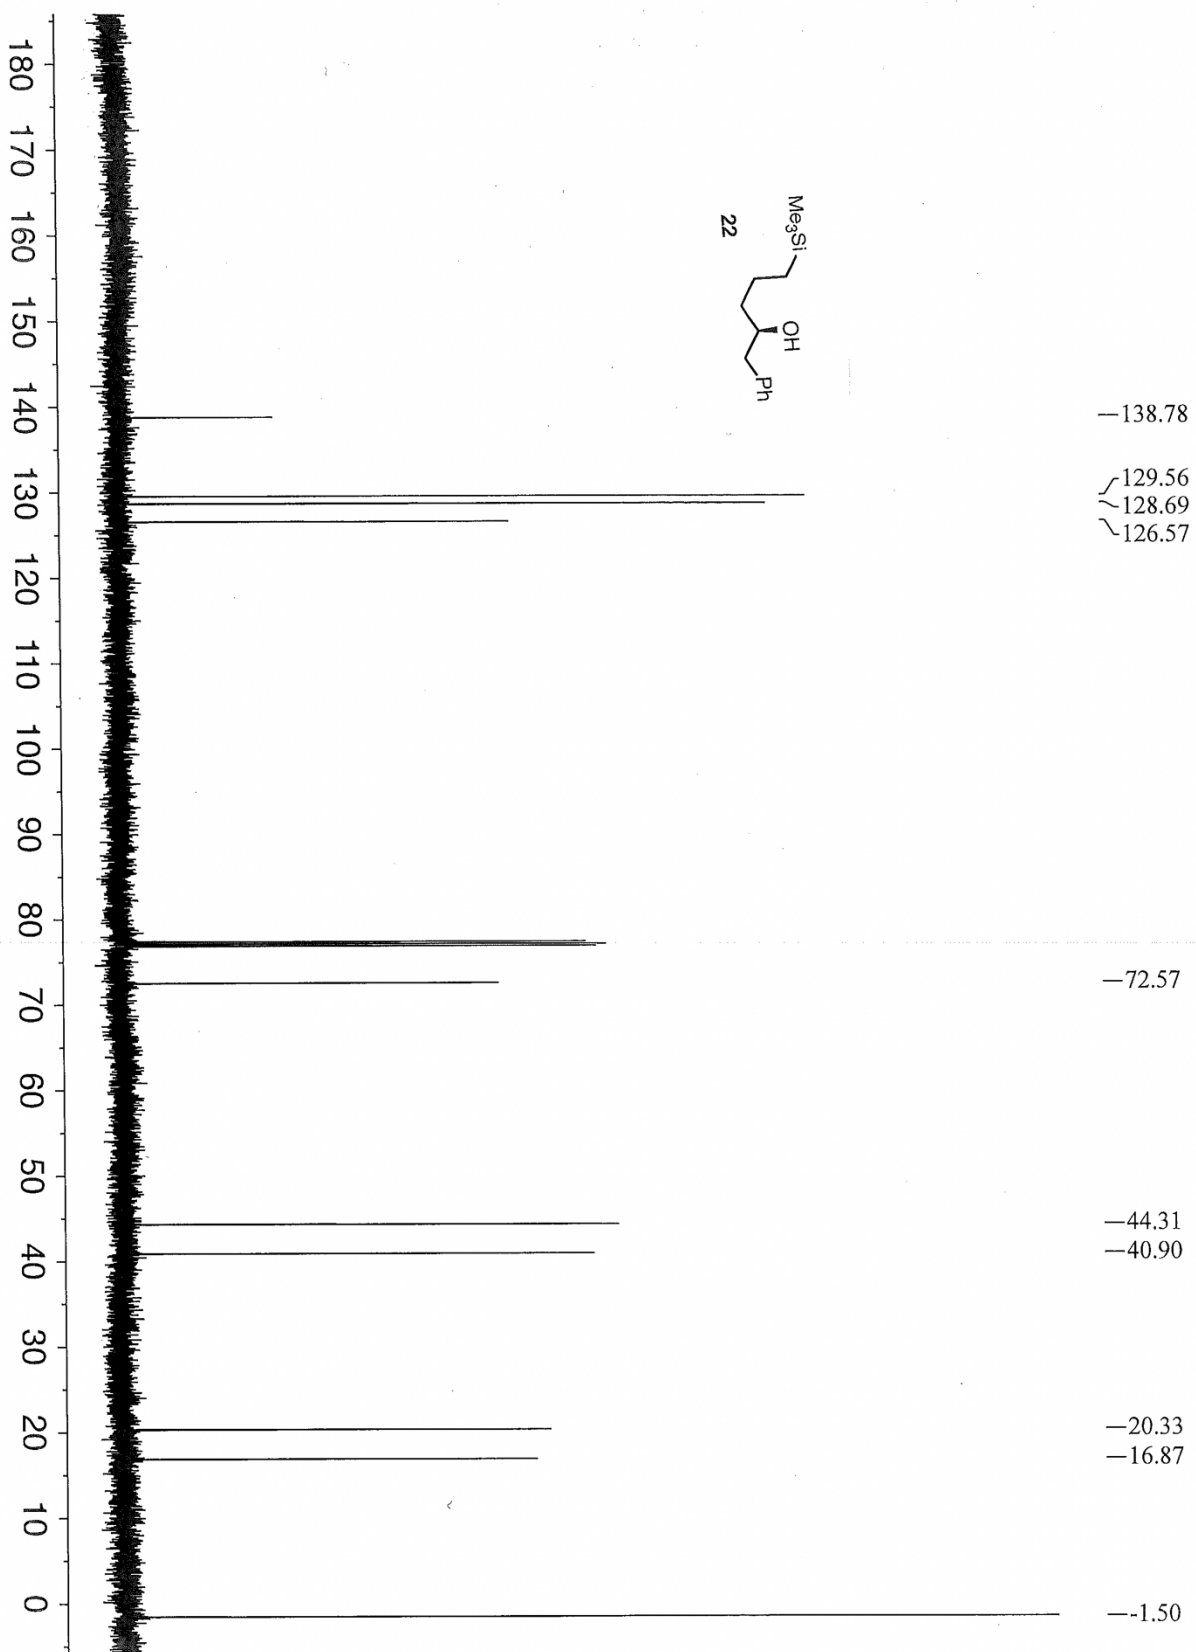



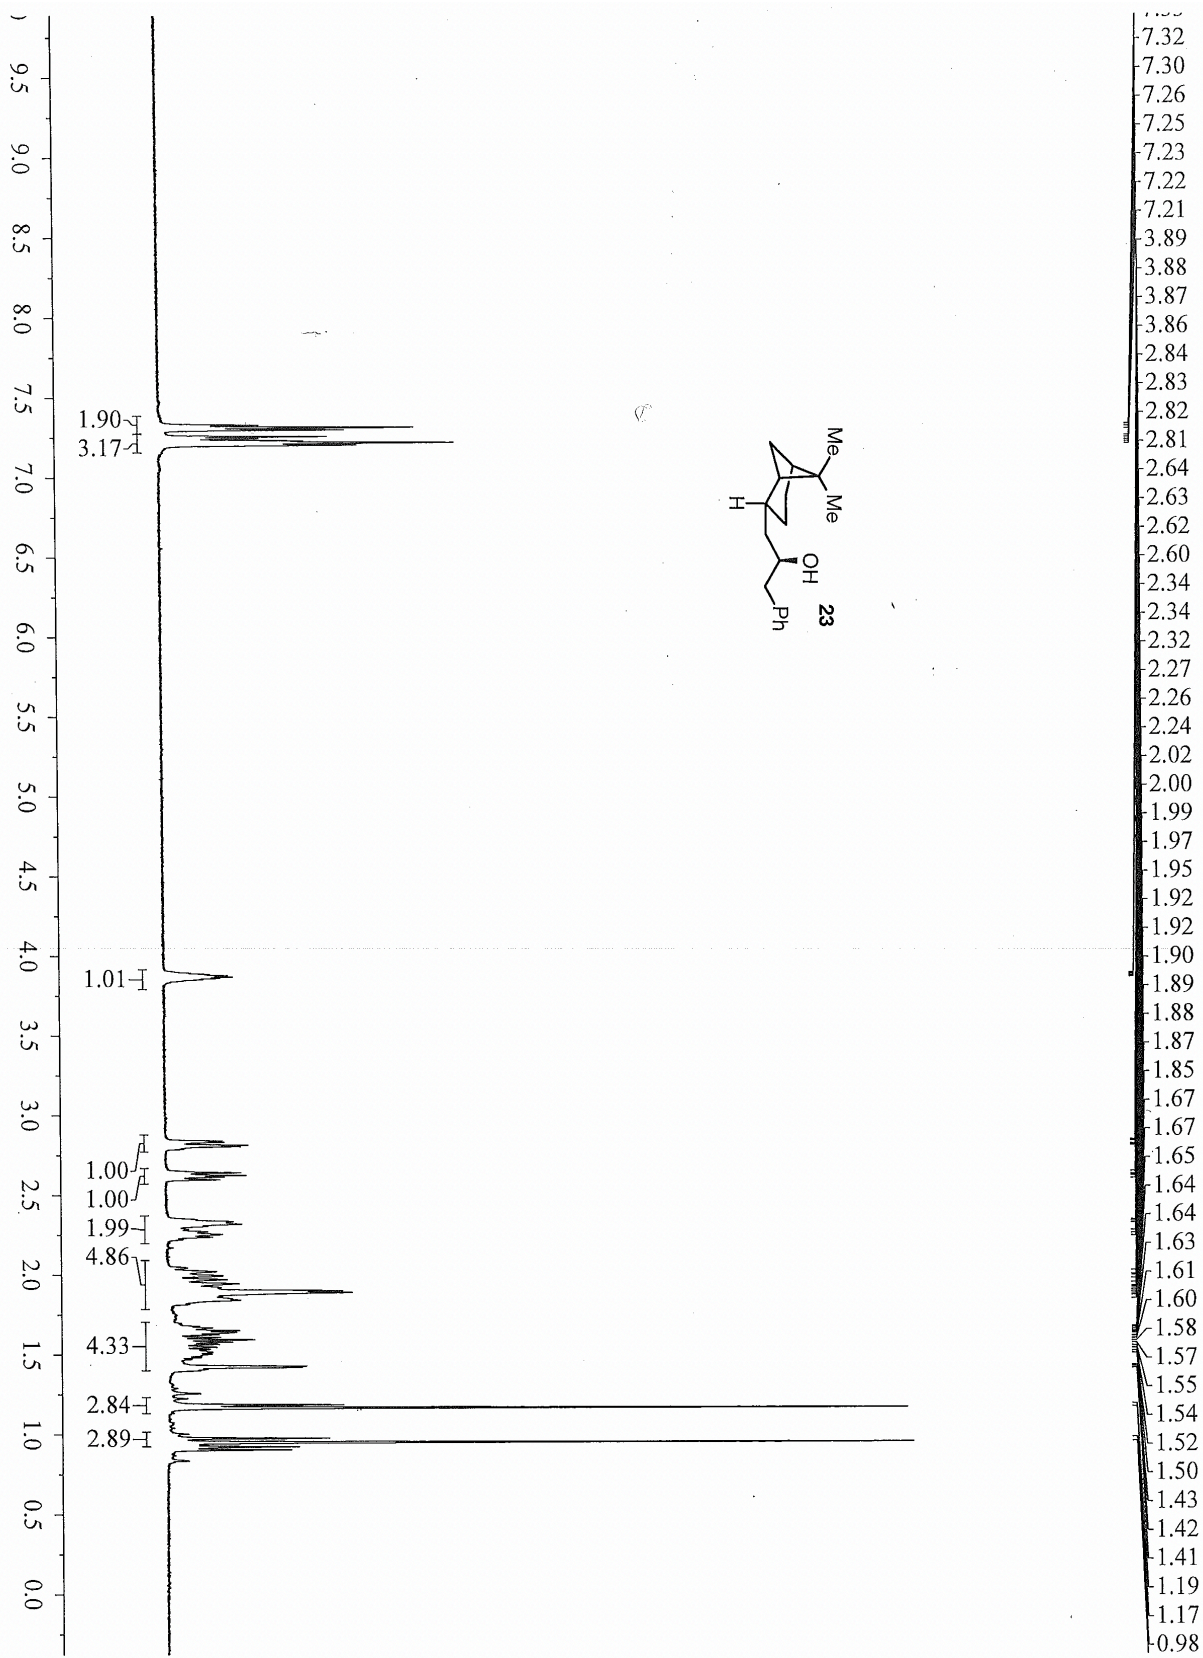

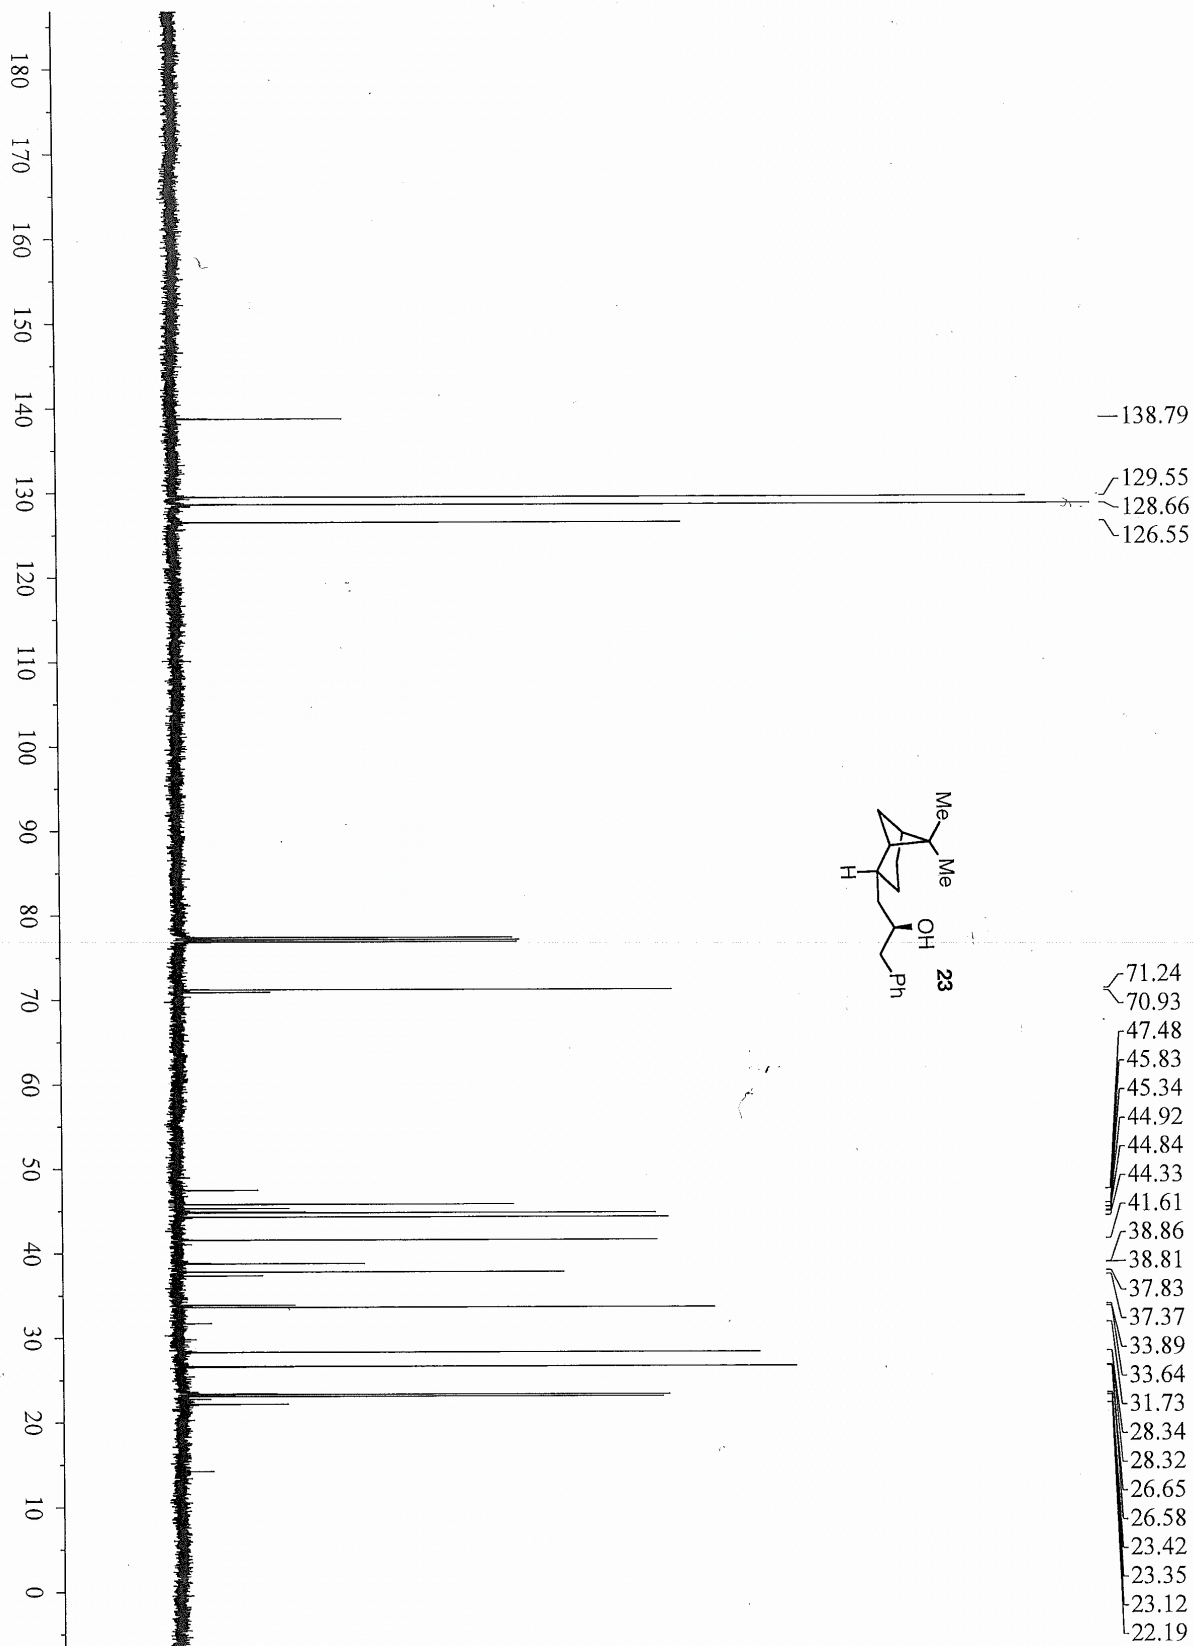

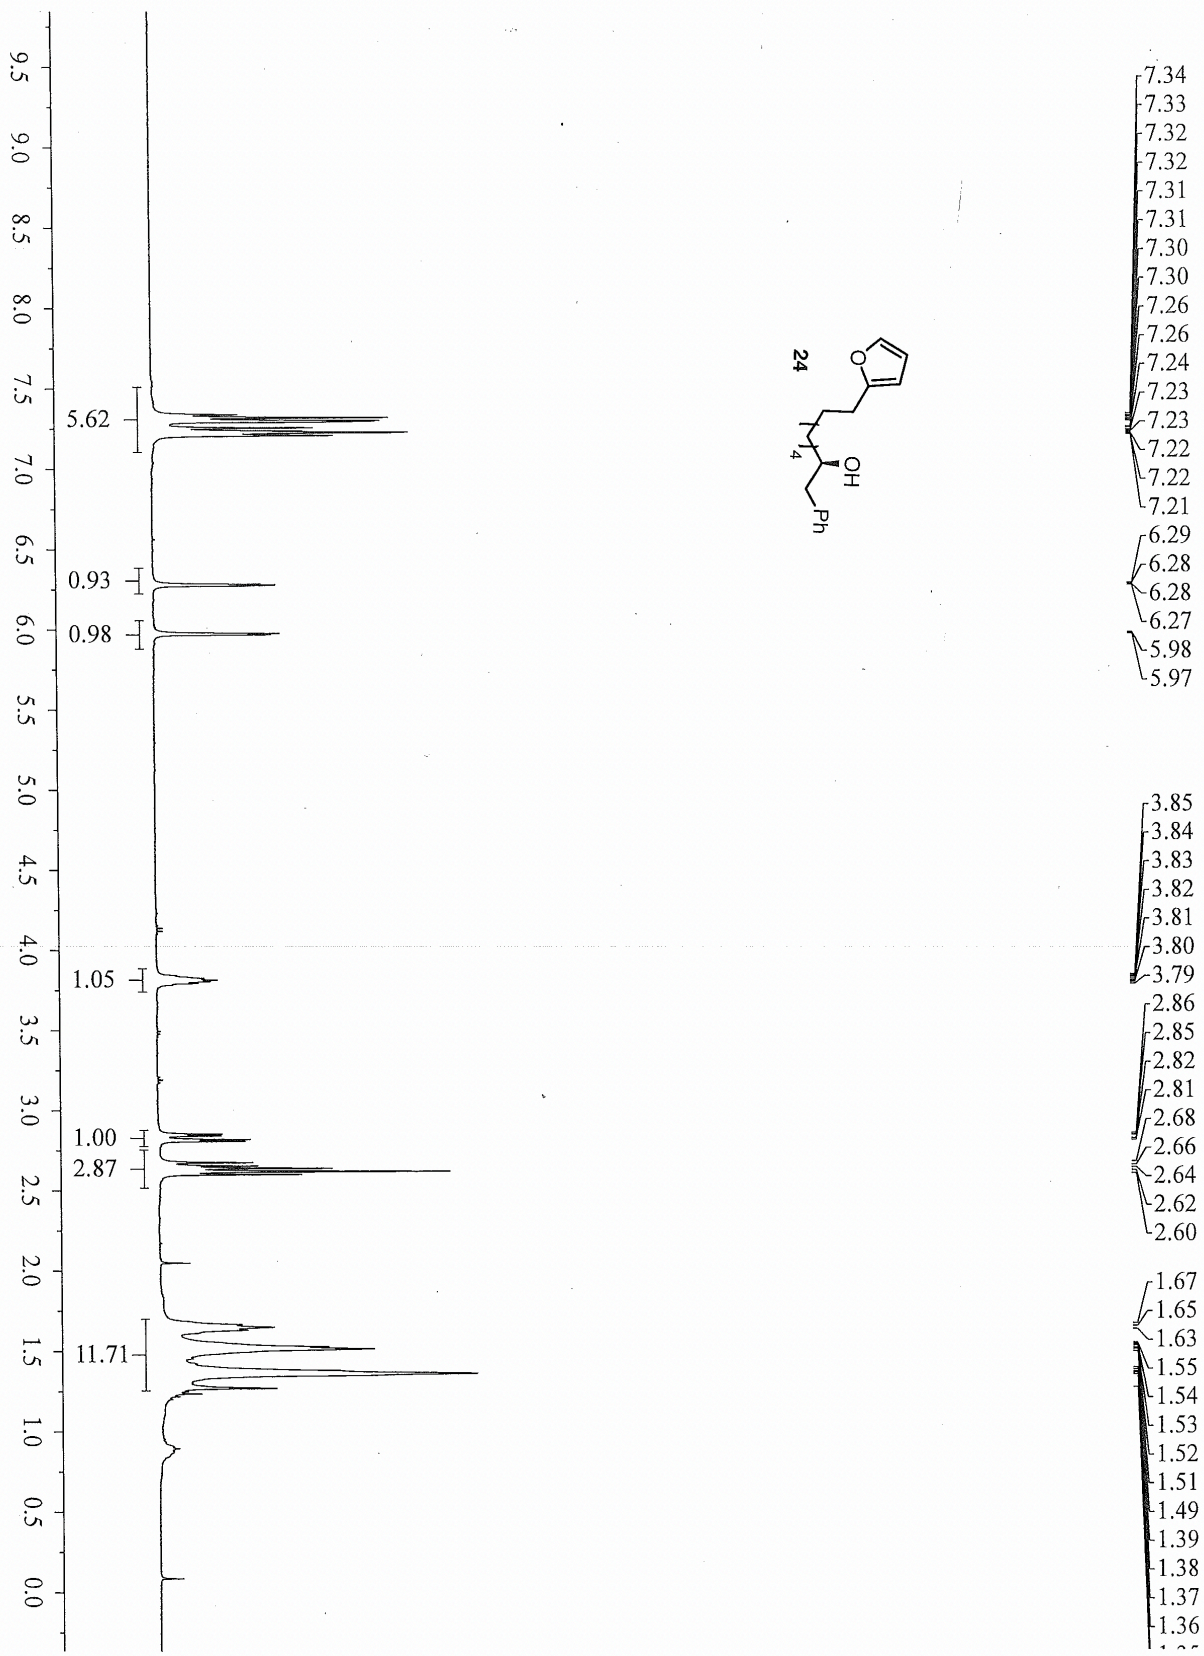



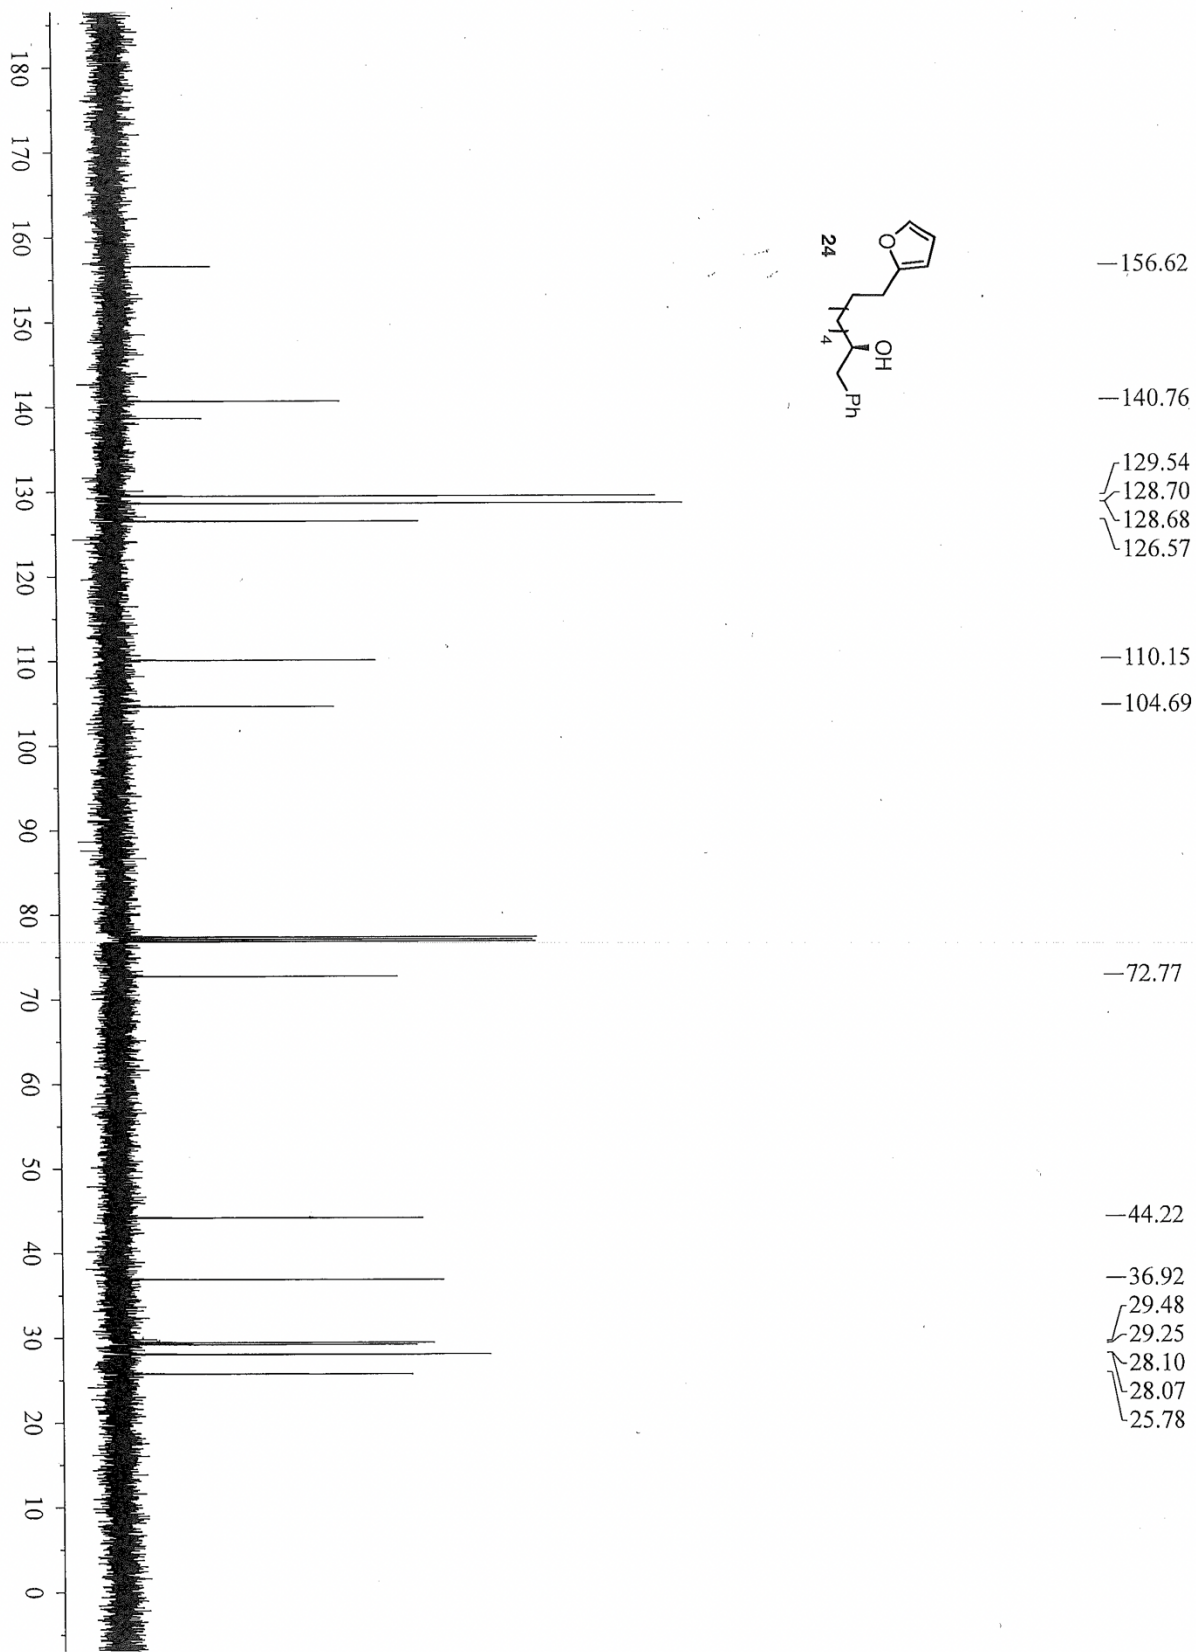

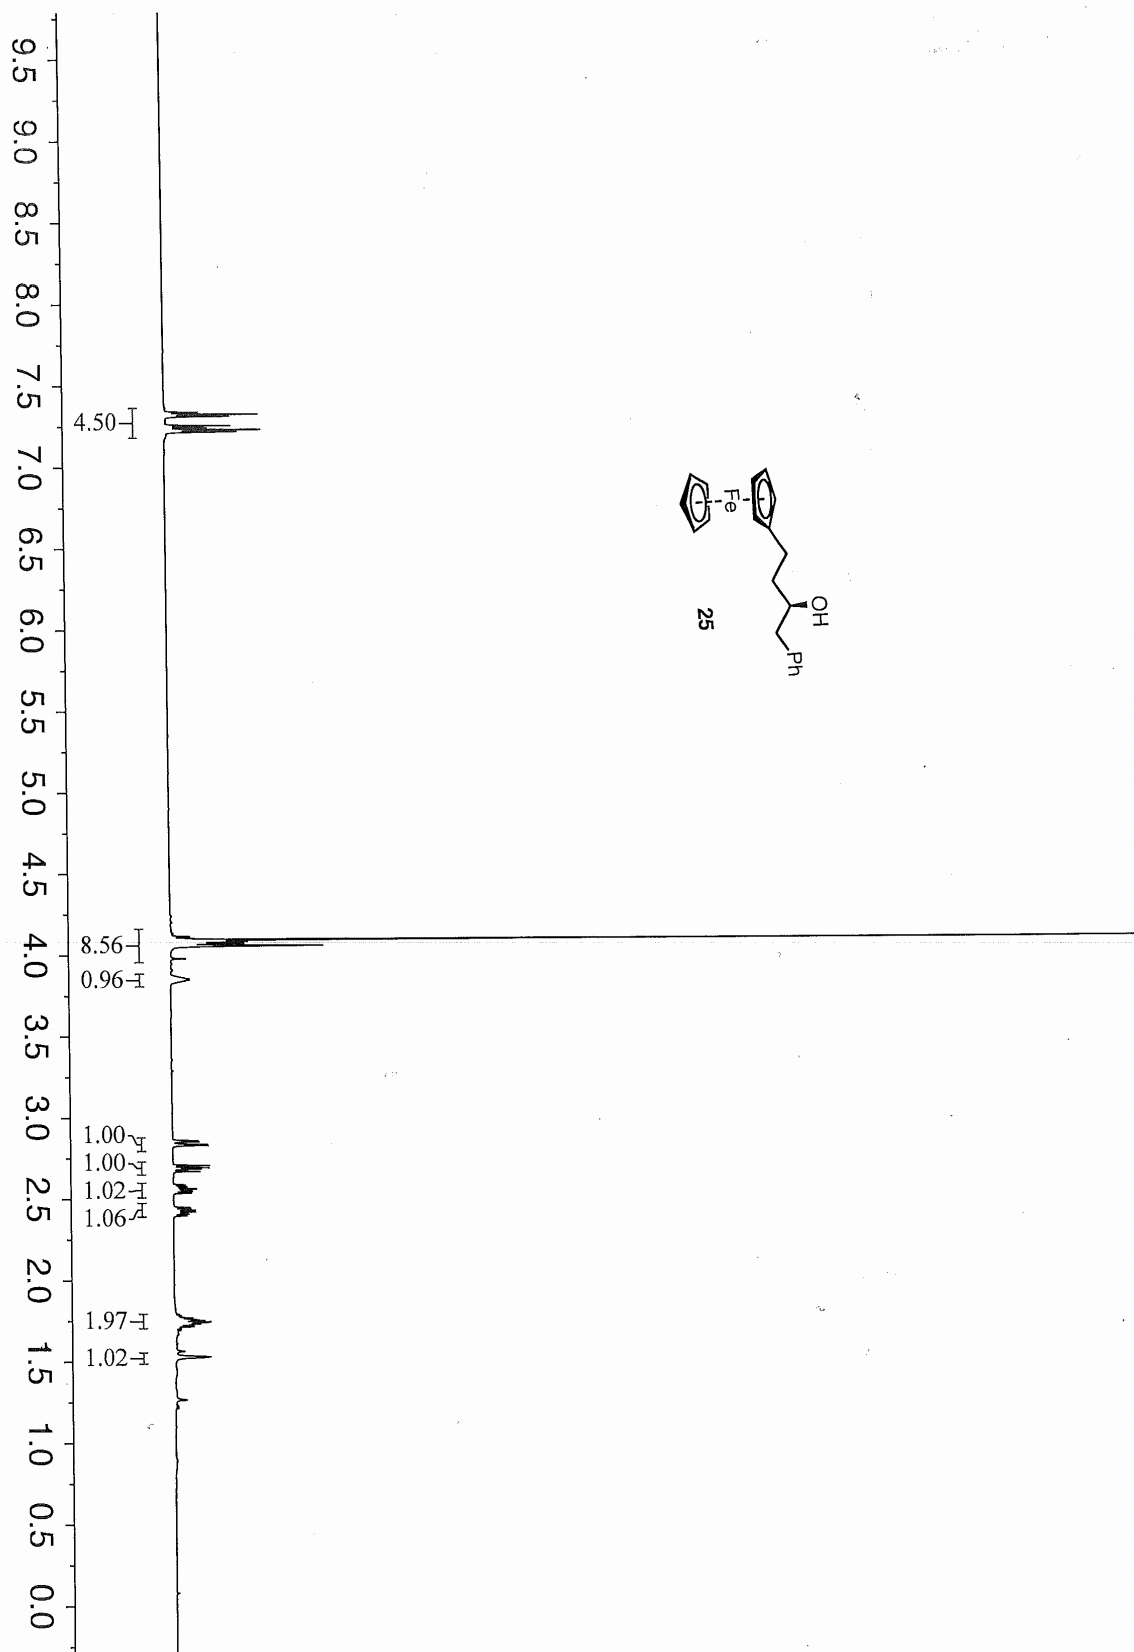

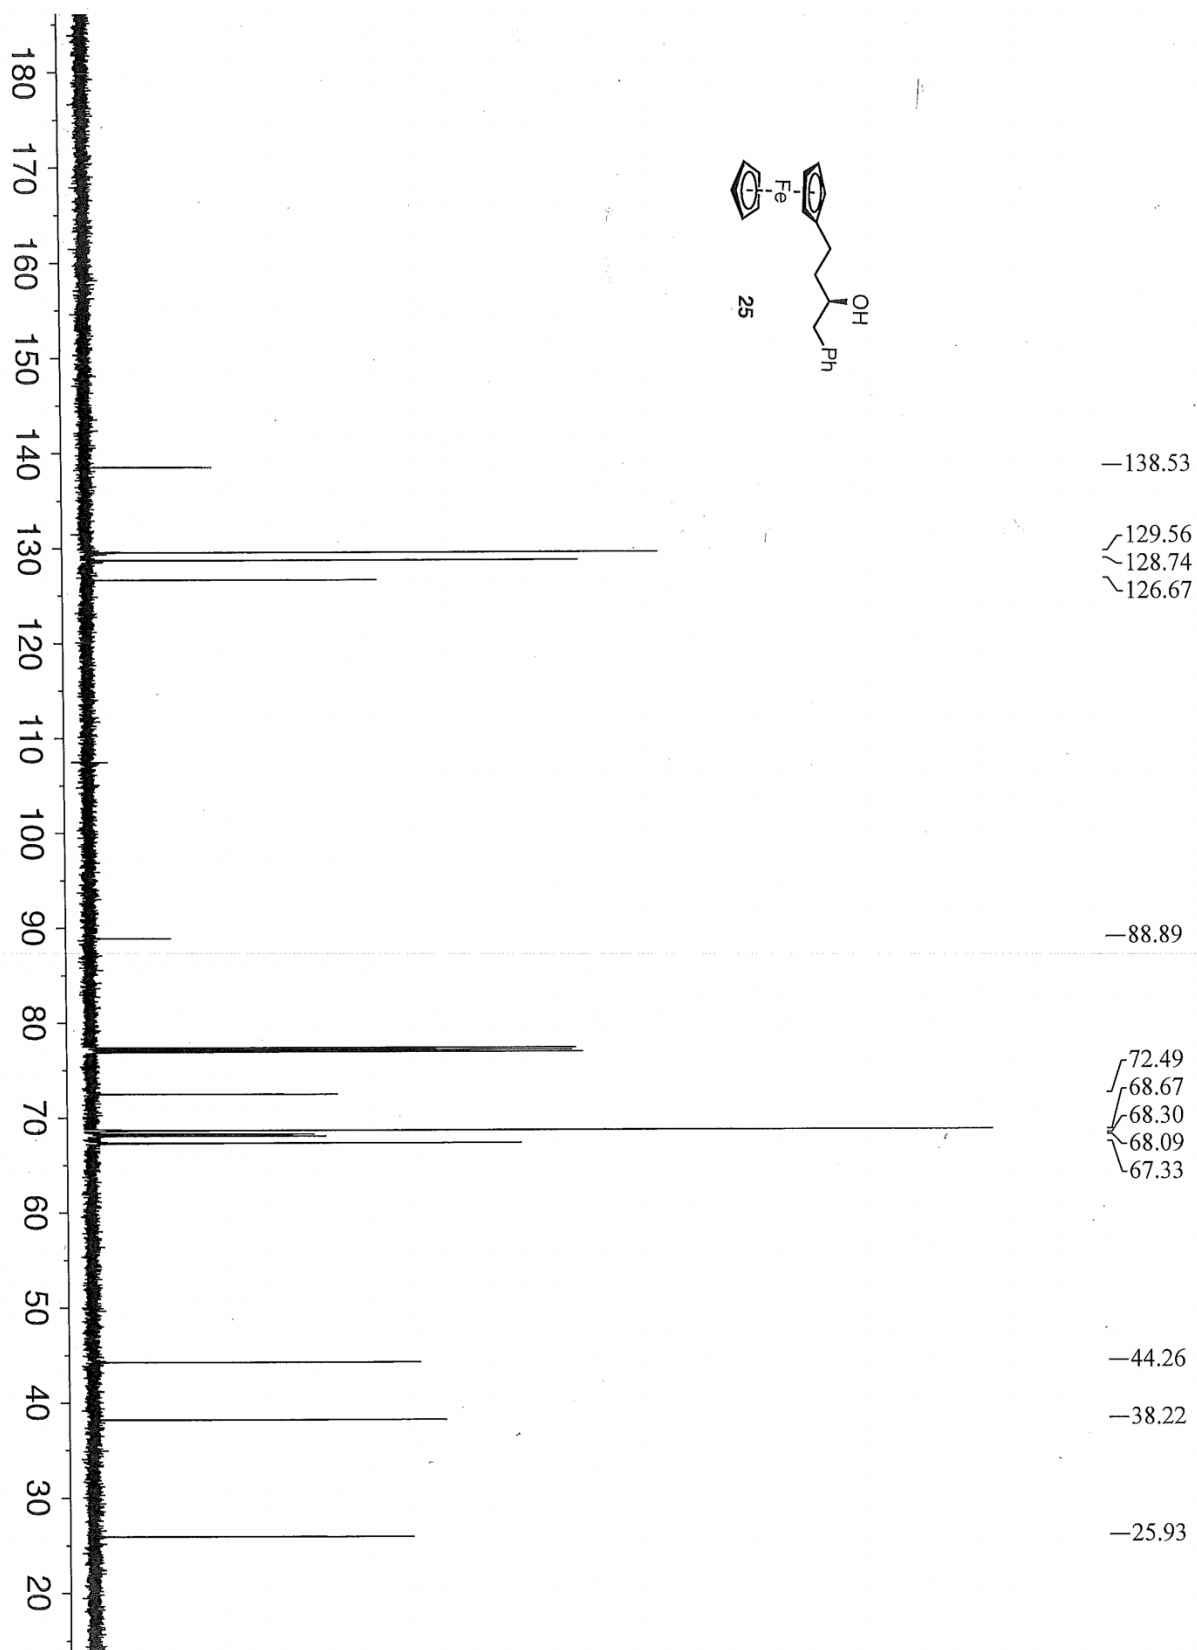



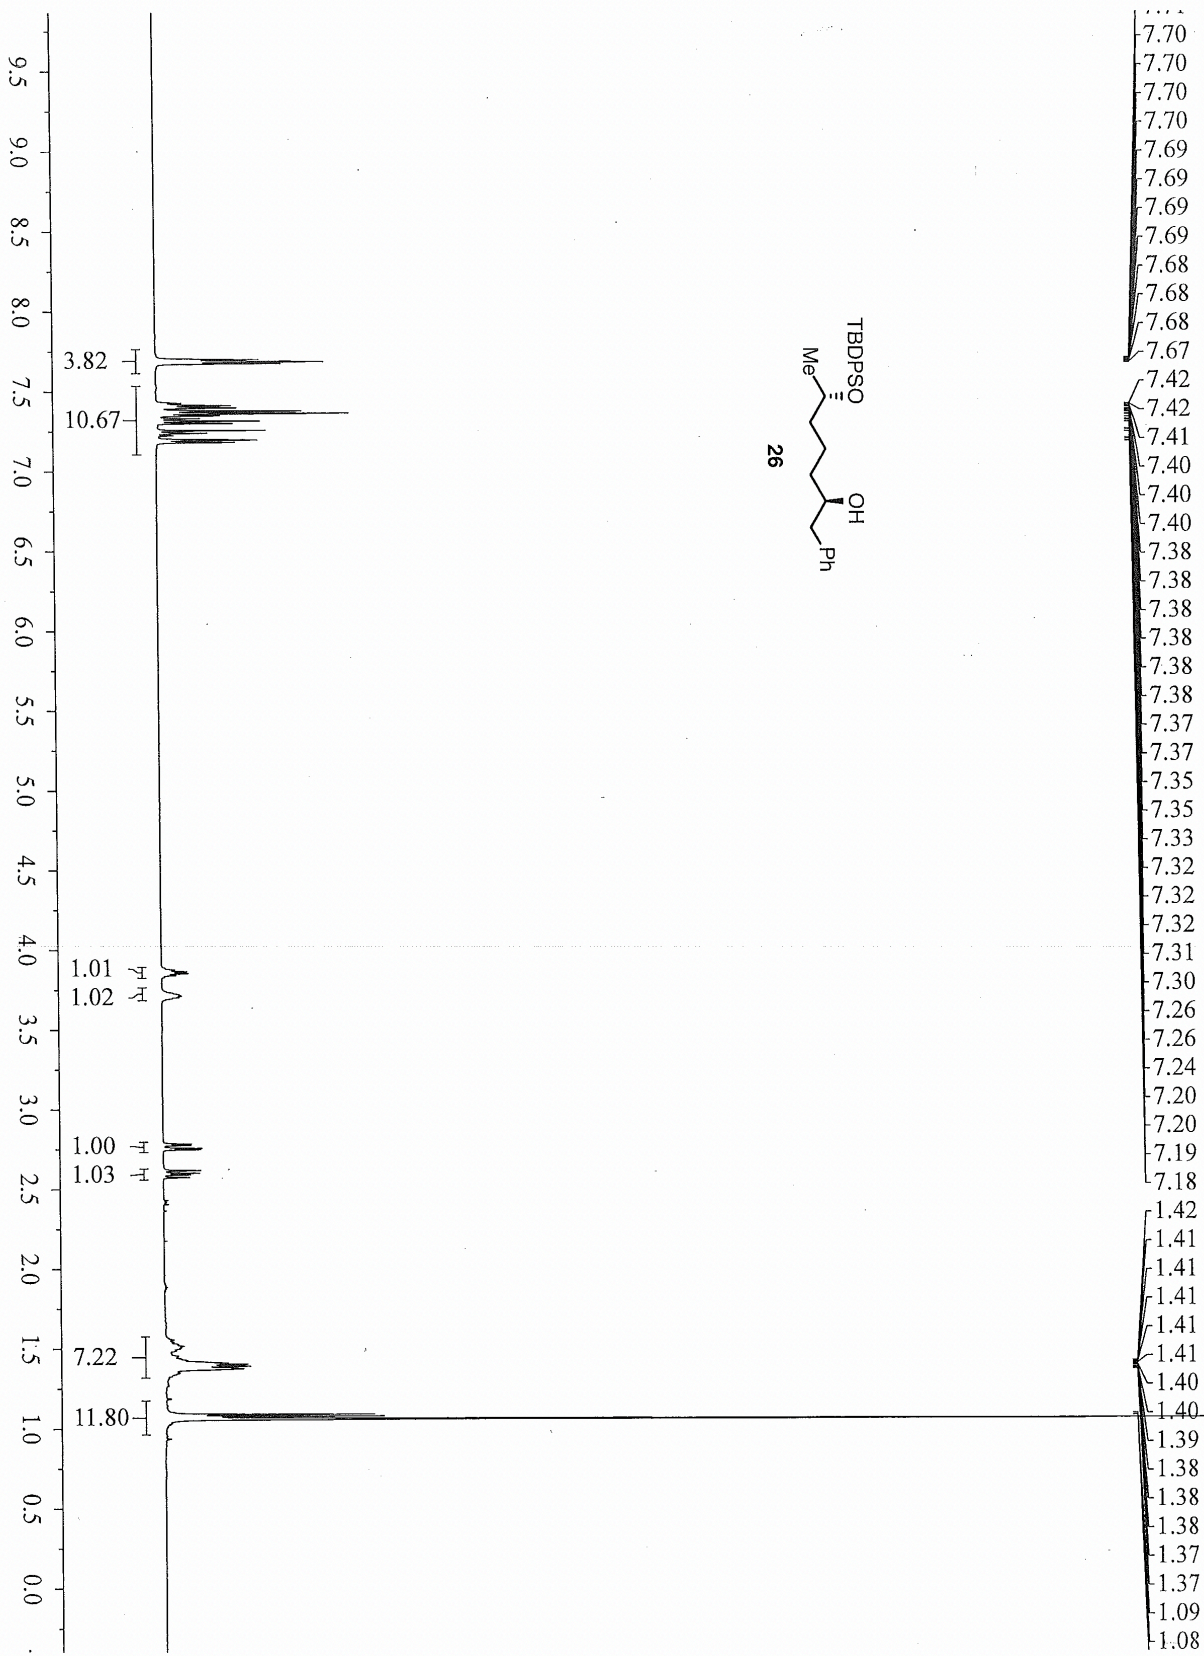

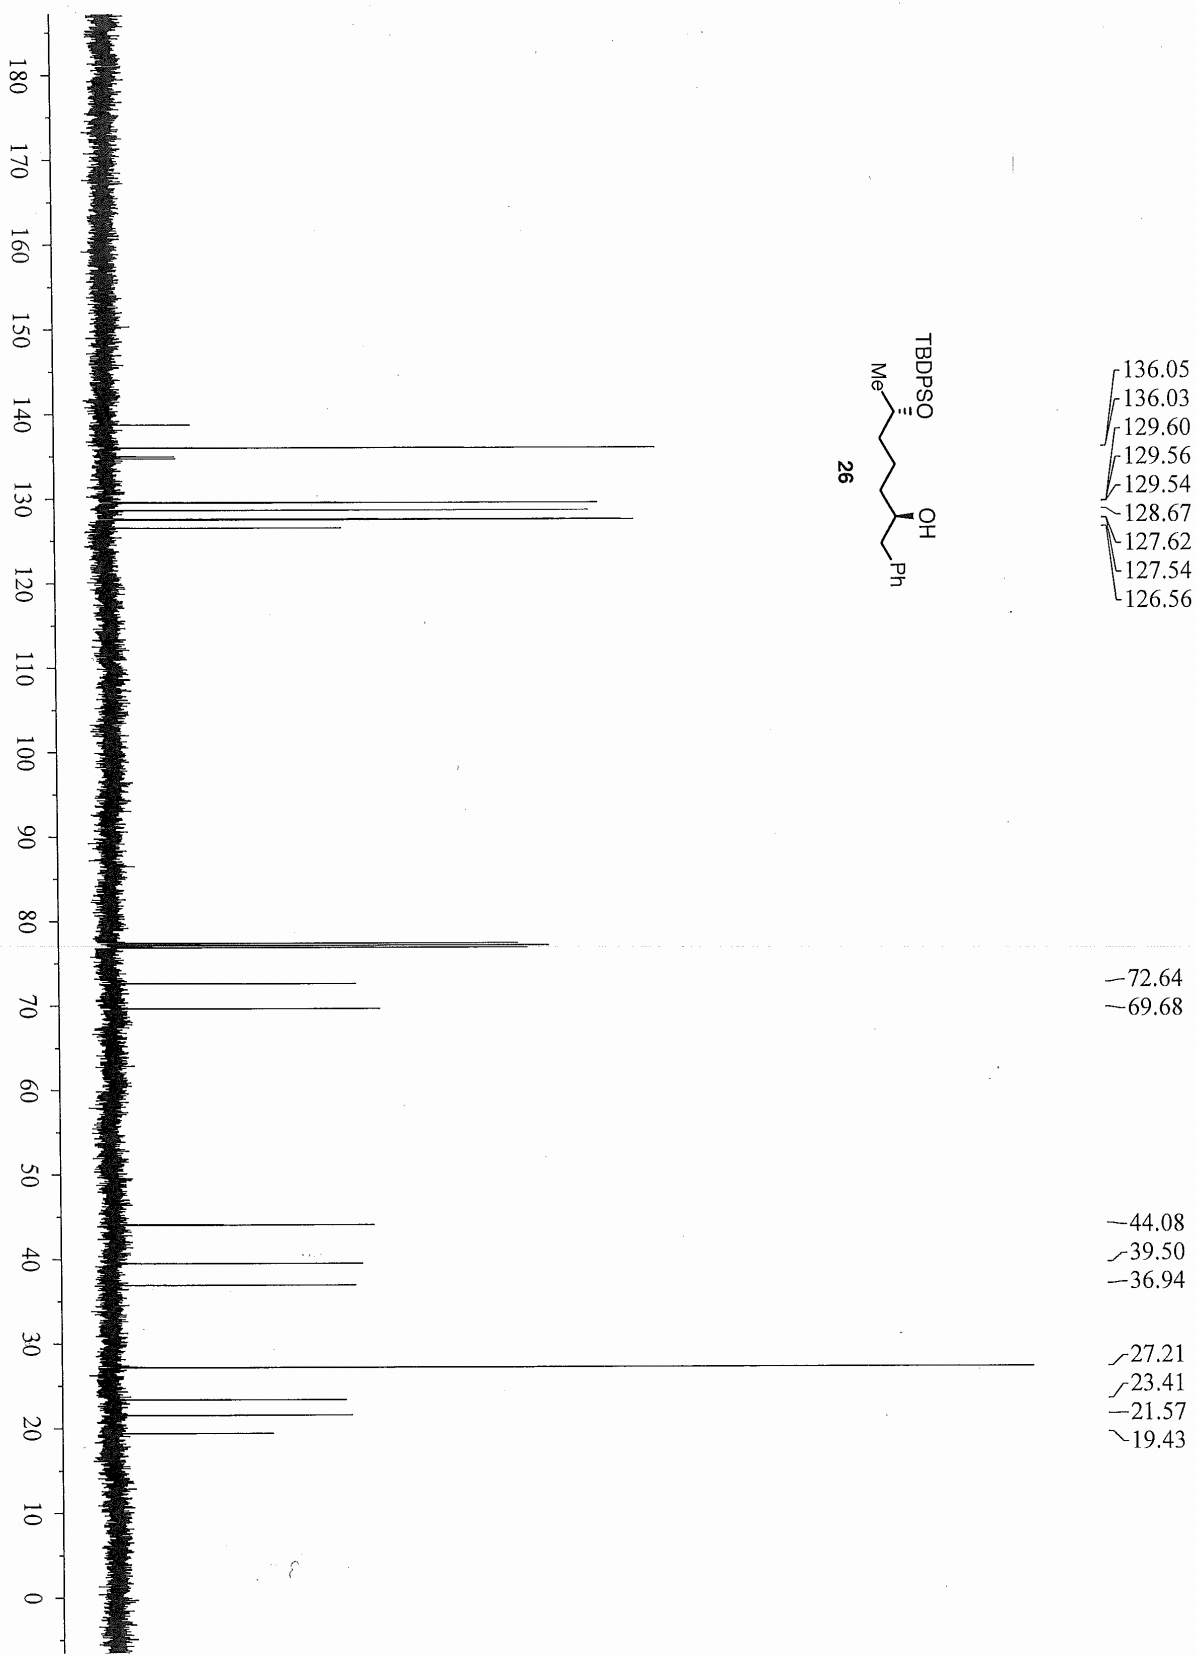





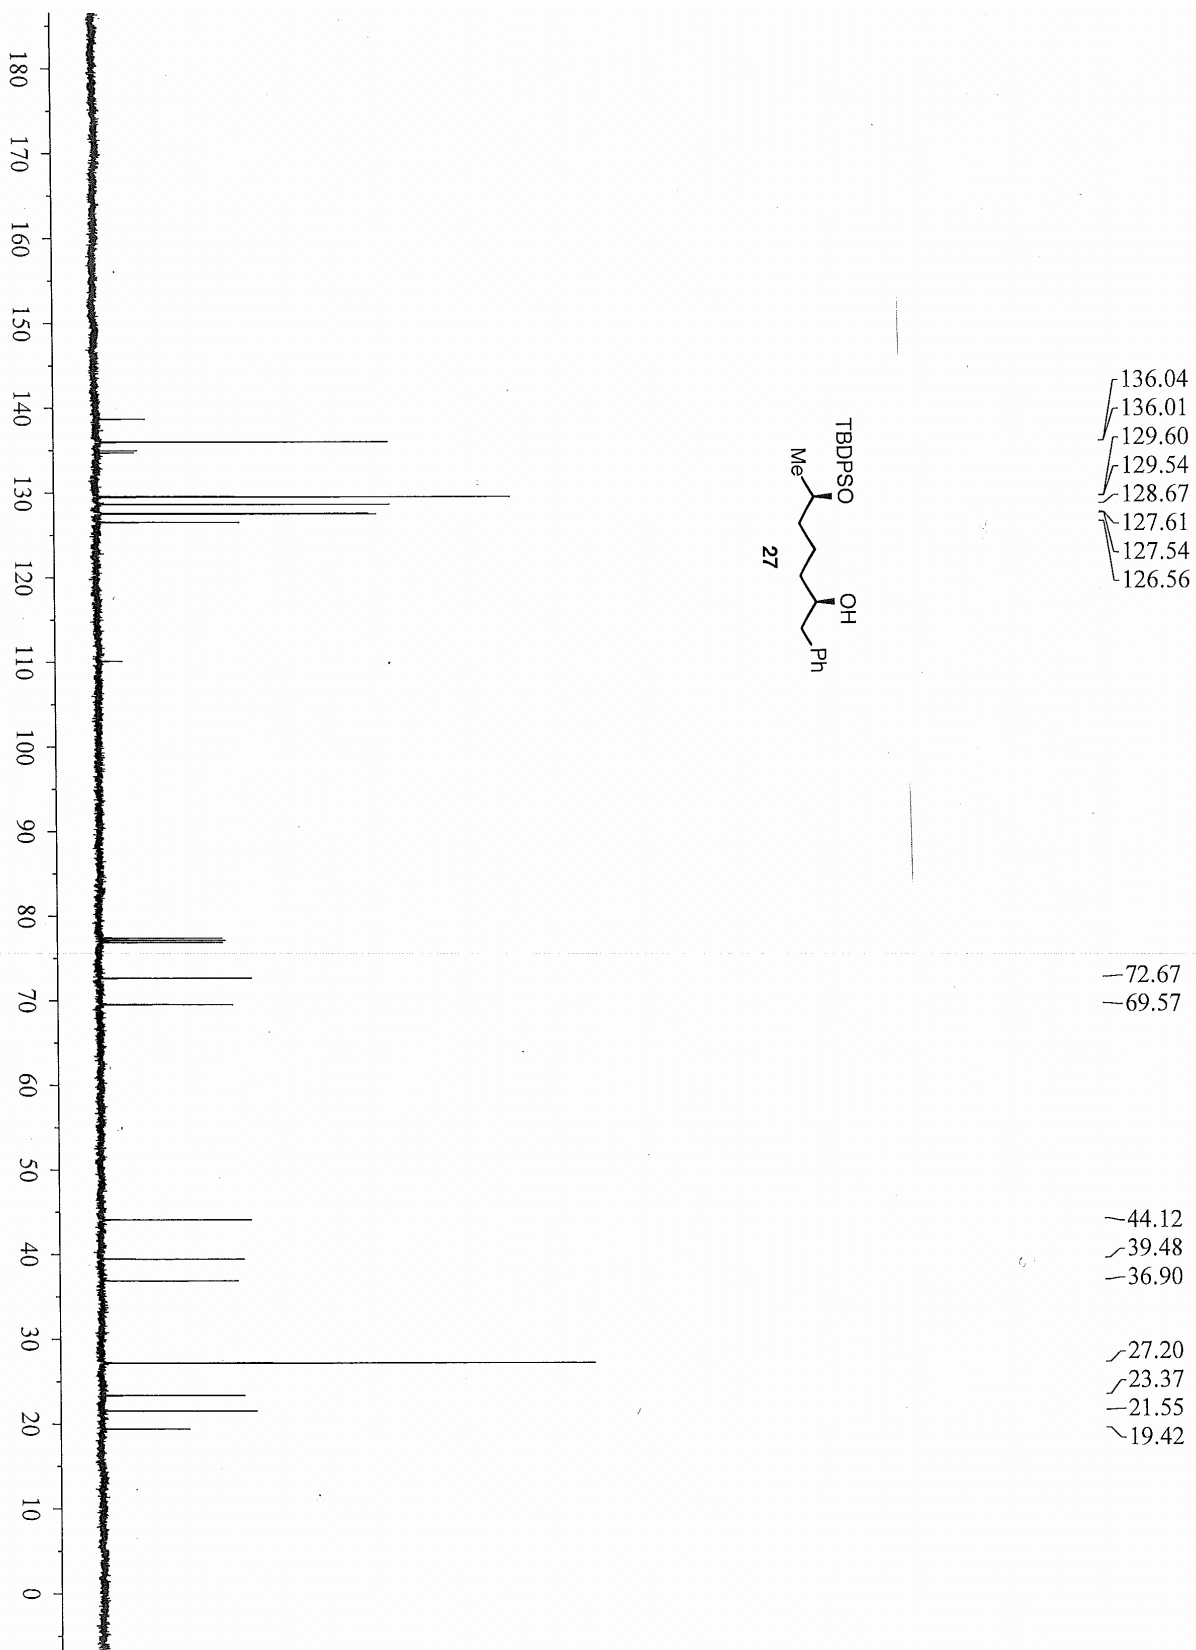

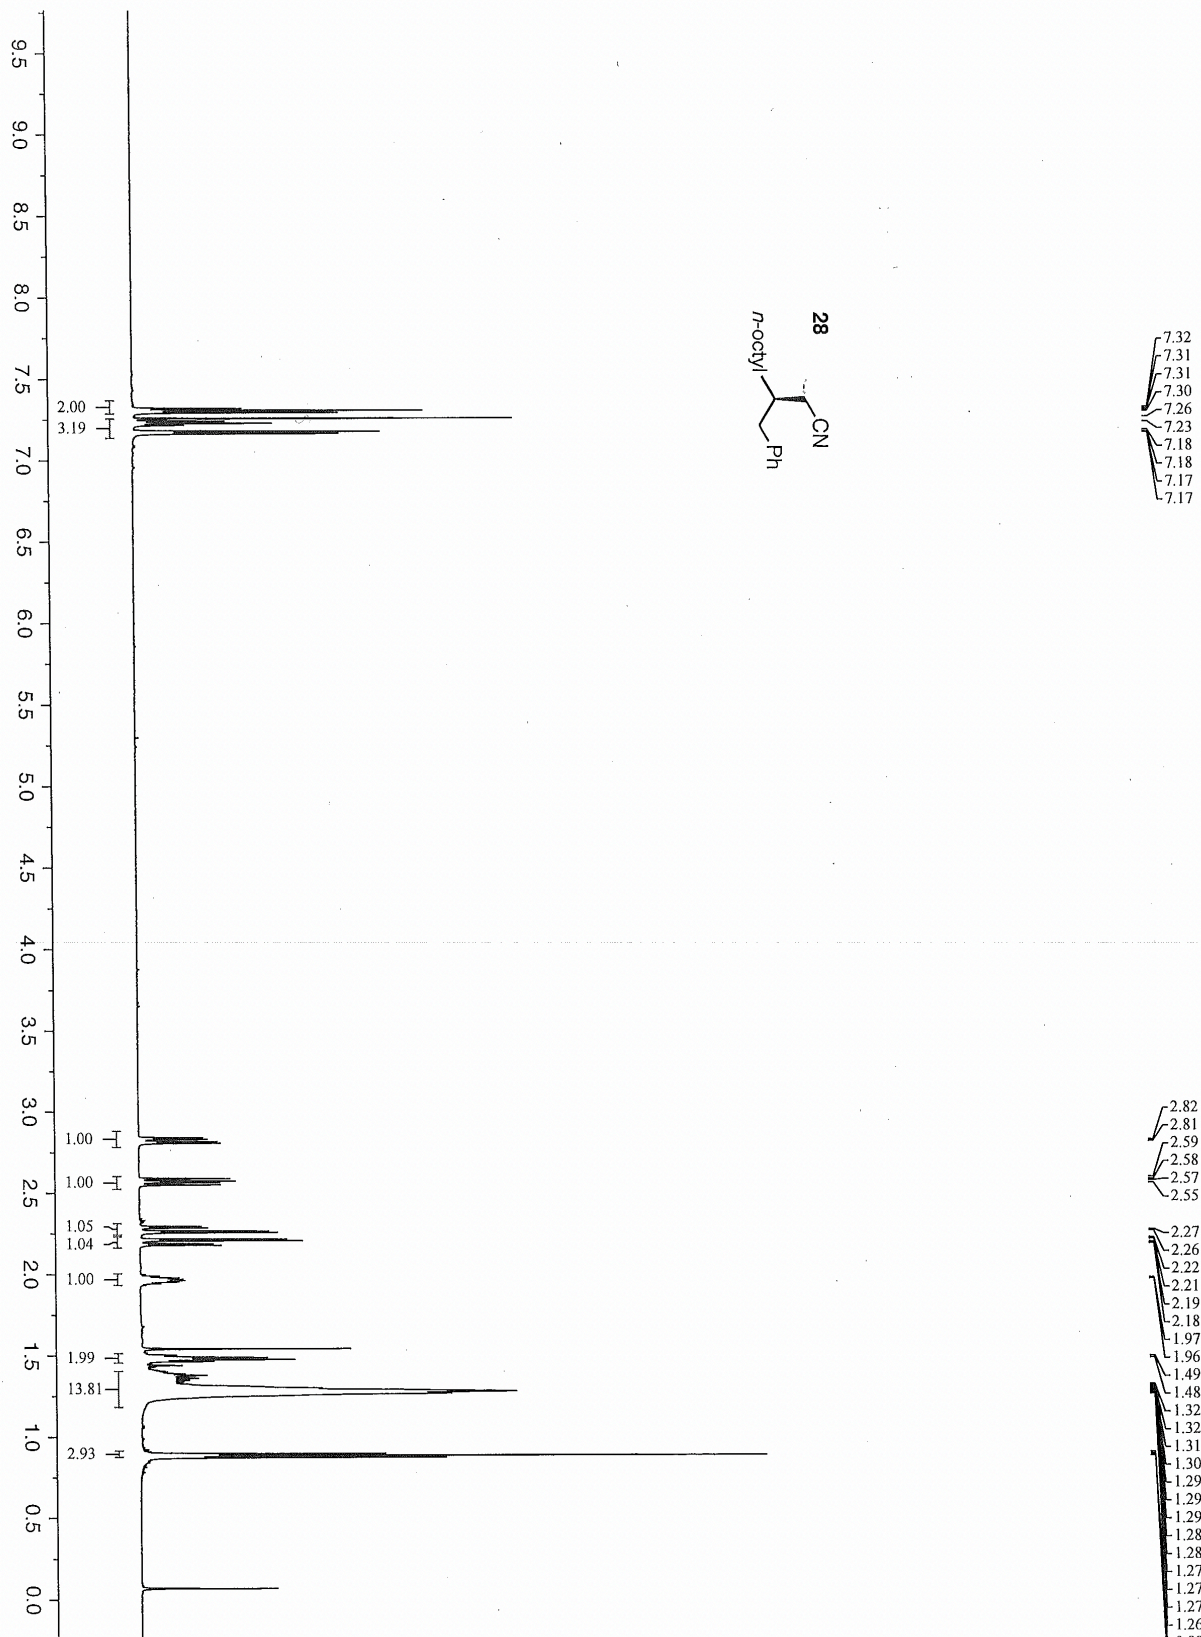

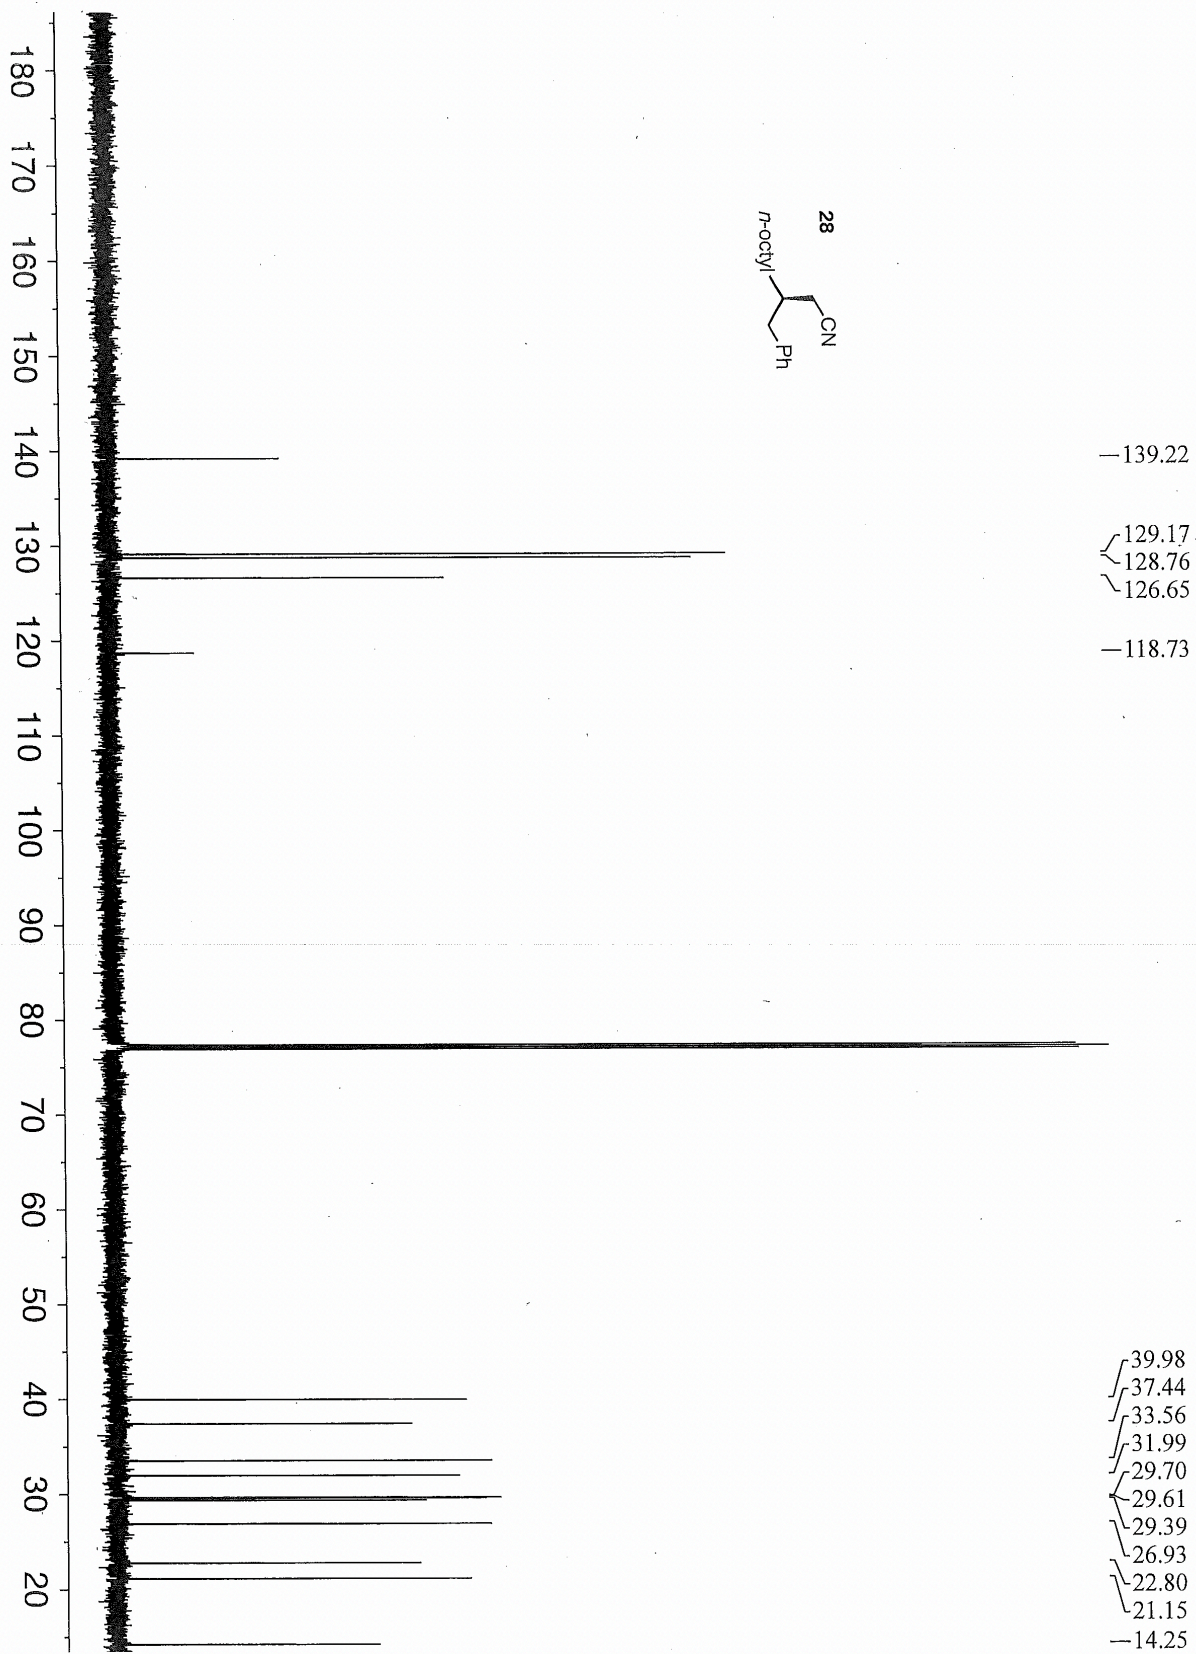



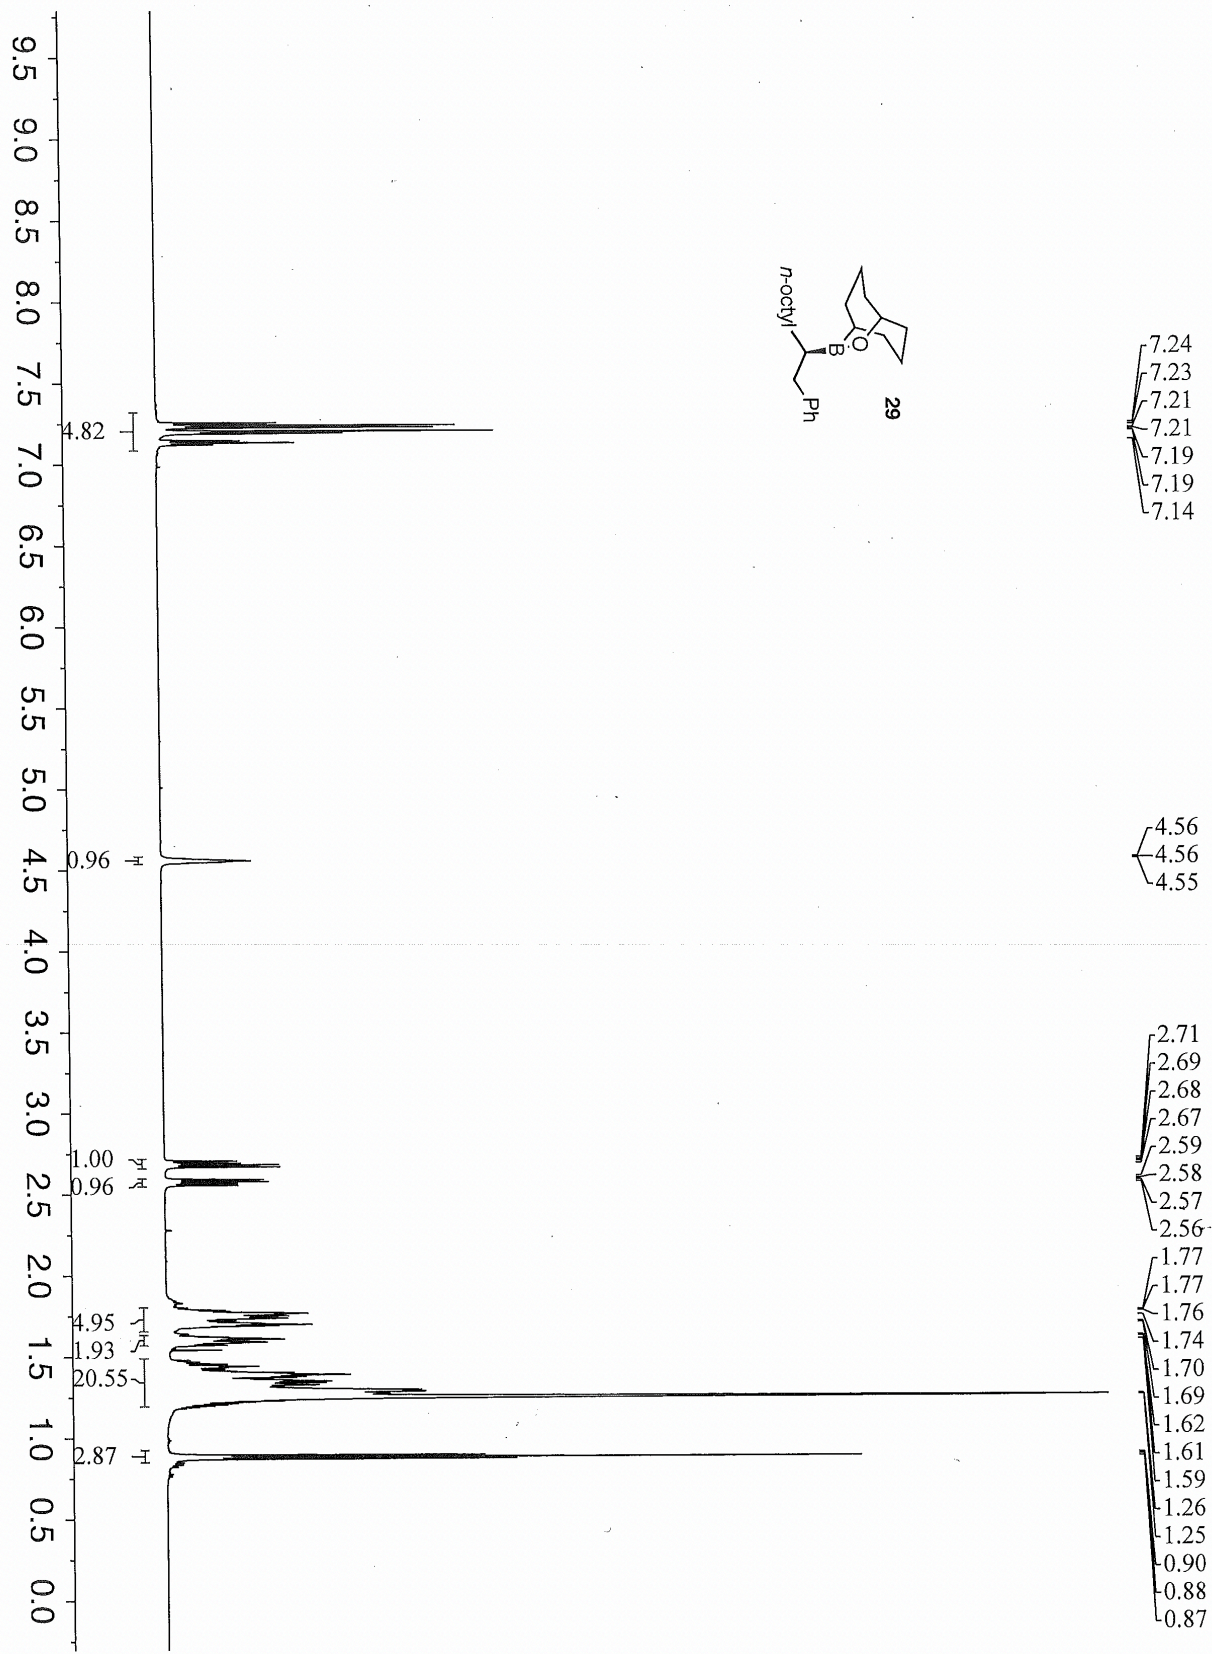

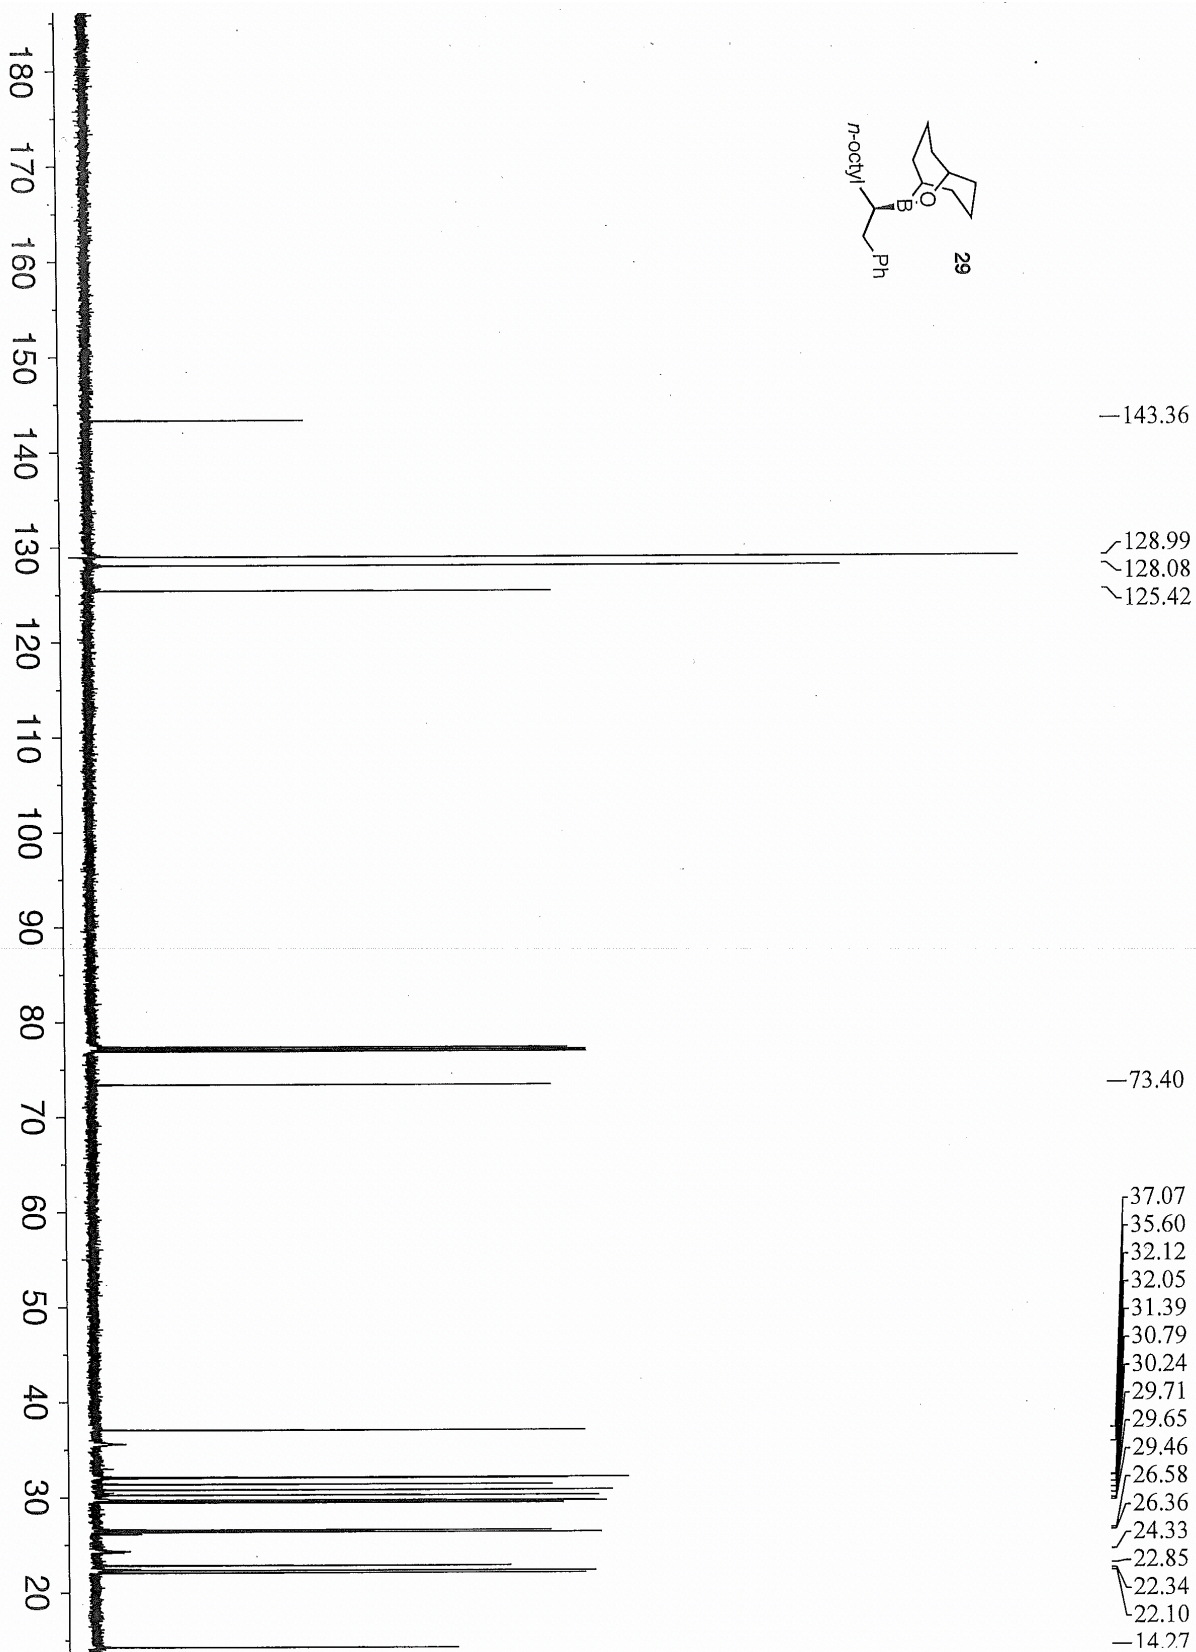

**$^{11}\text{B}$  NMR**

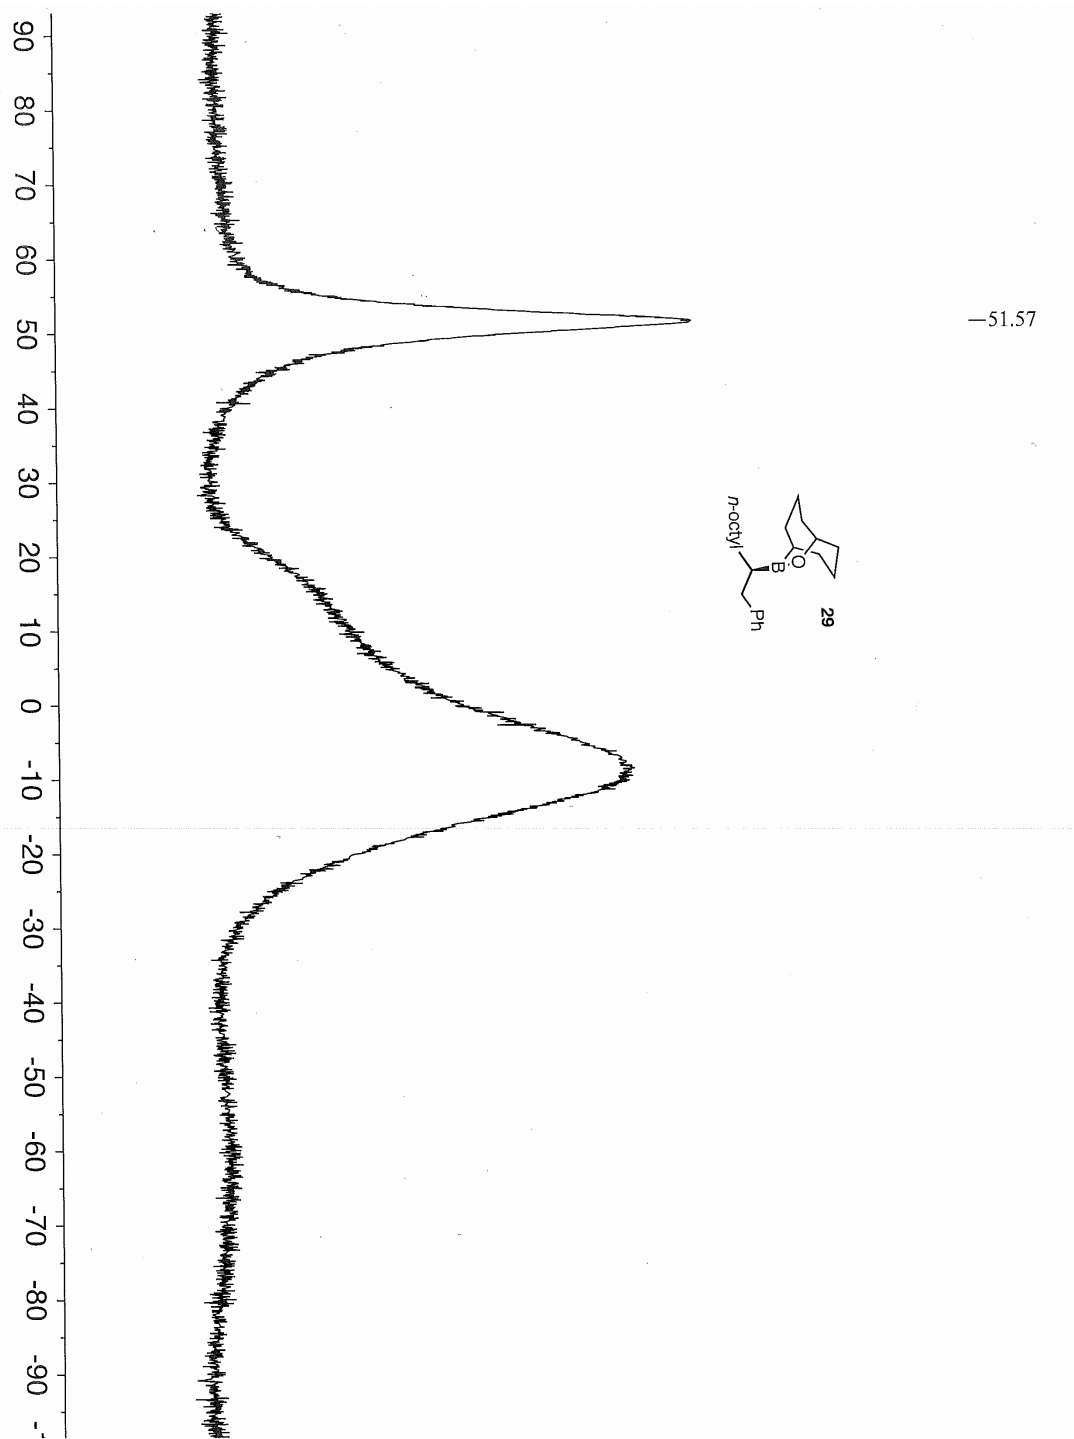

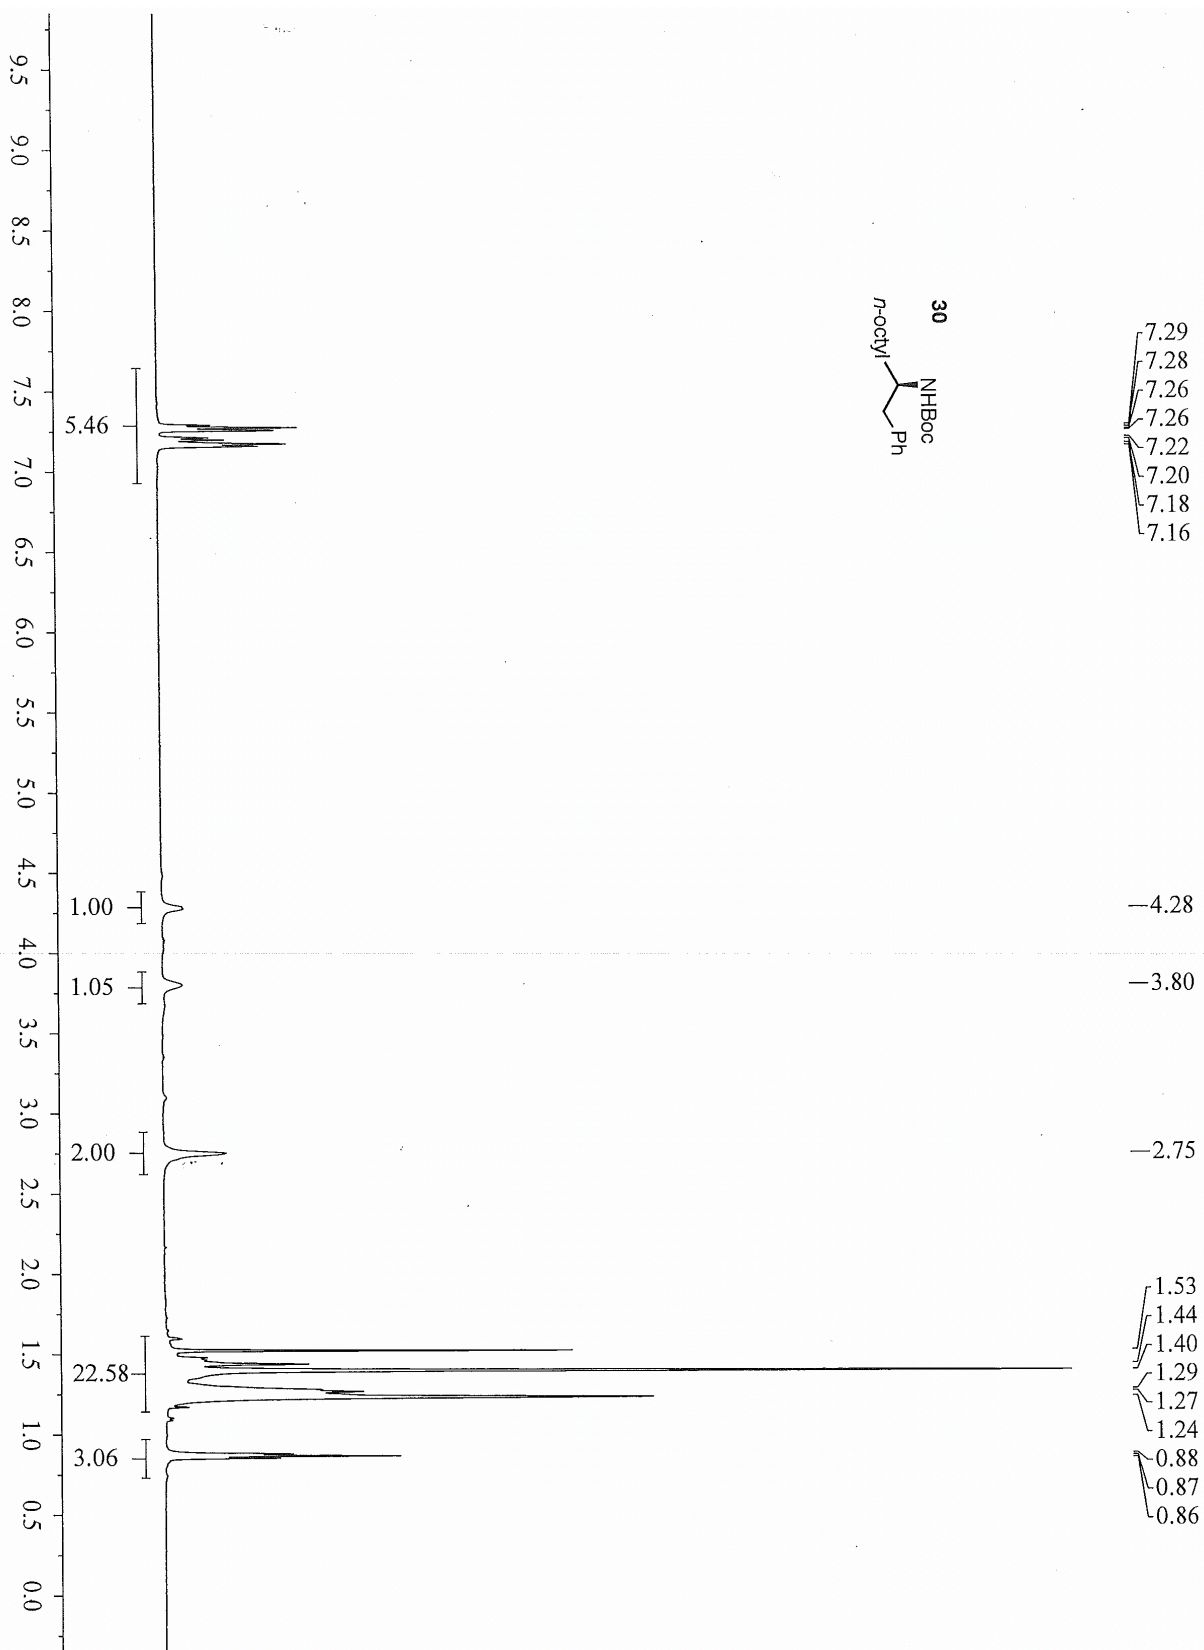



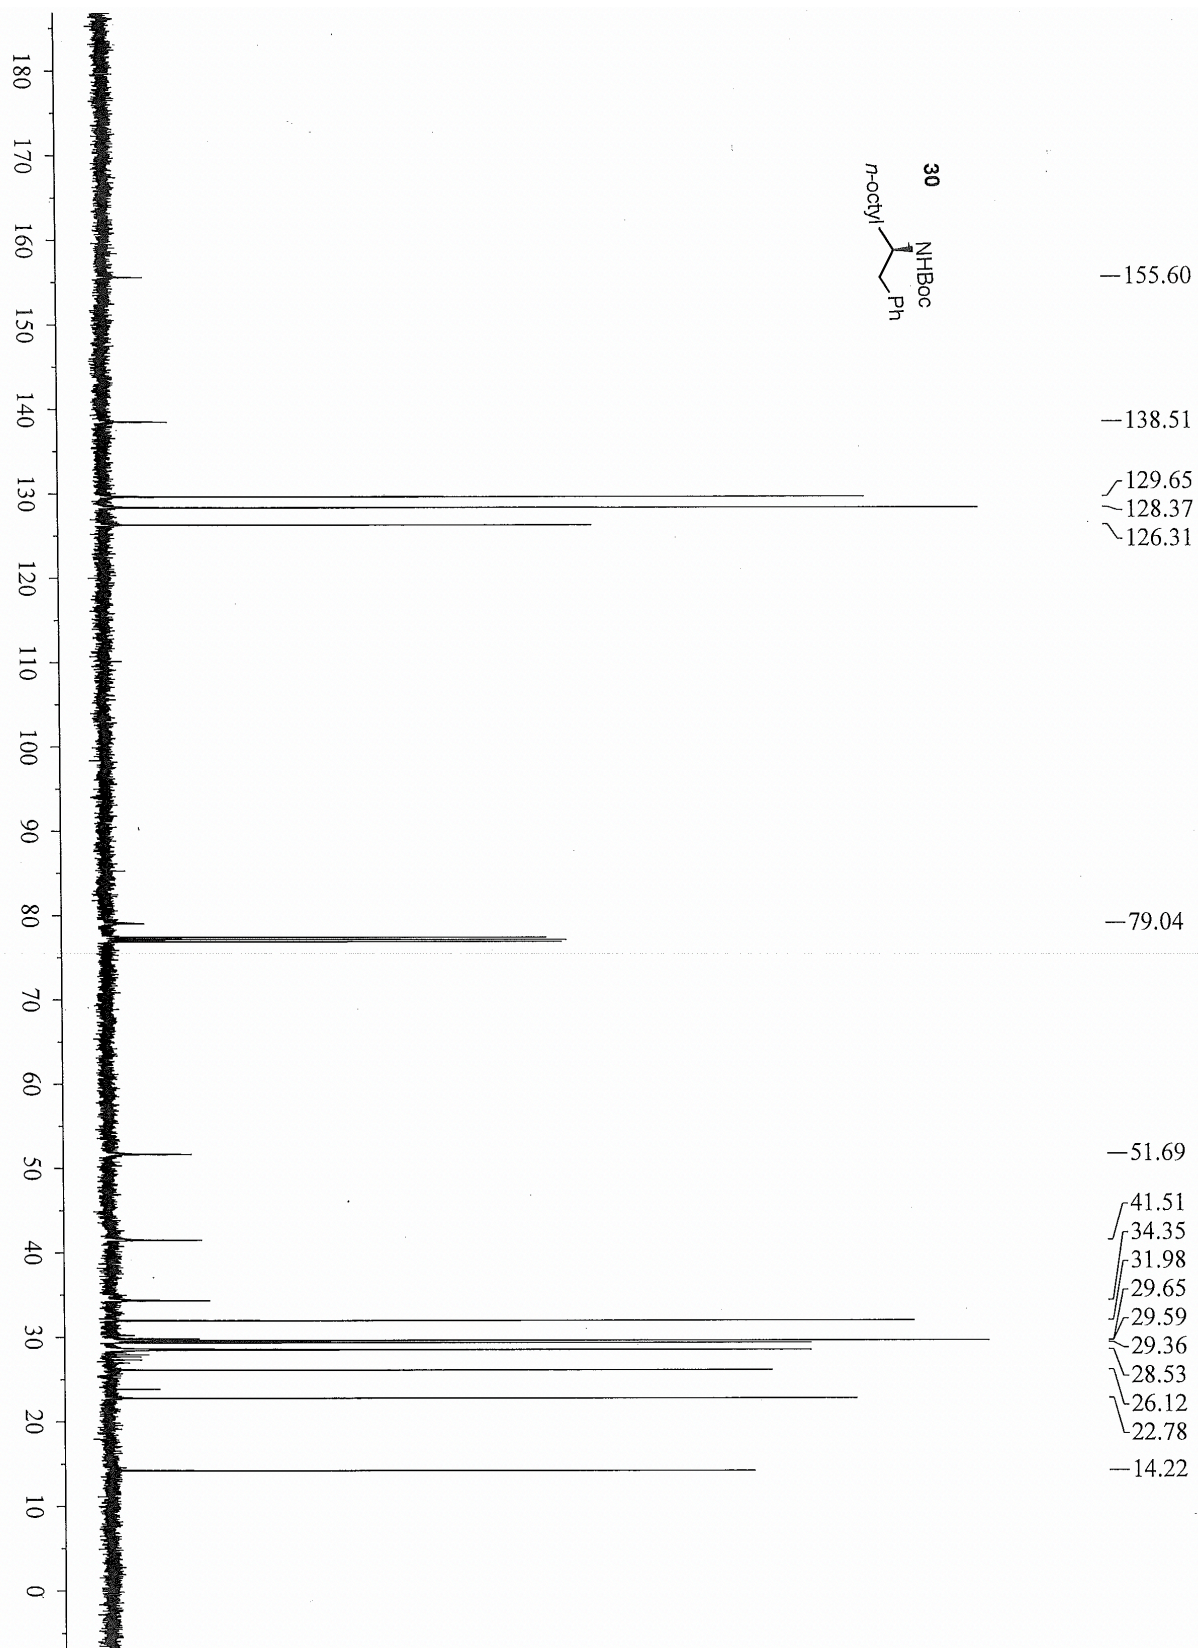



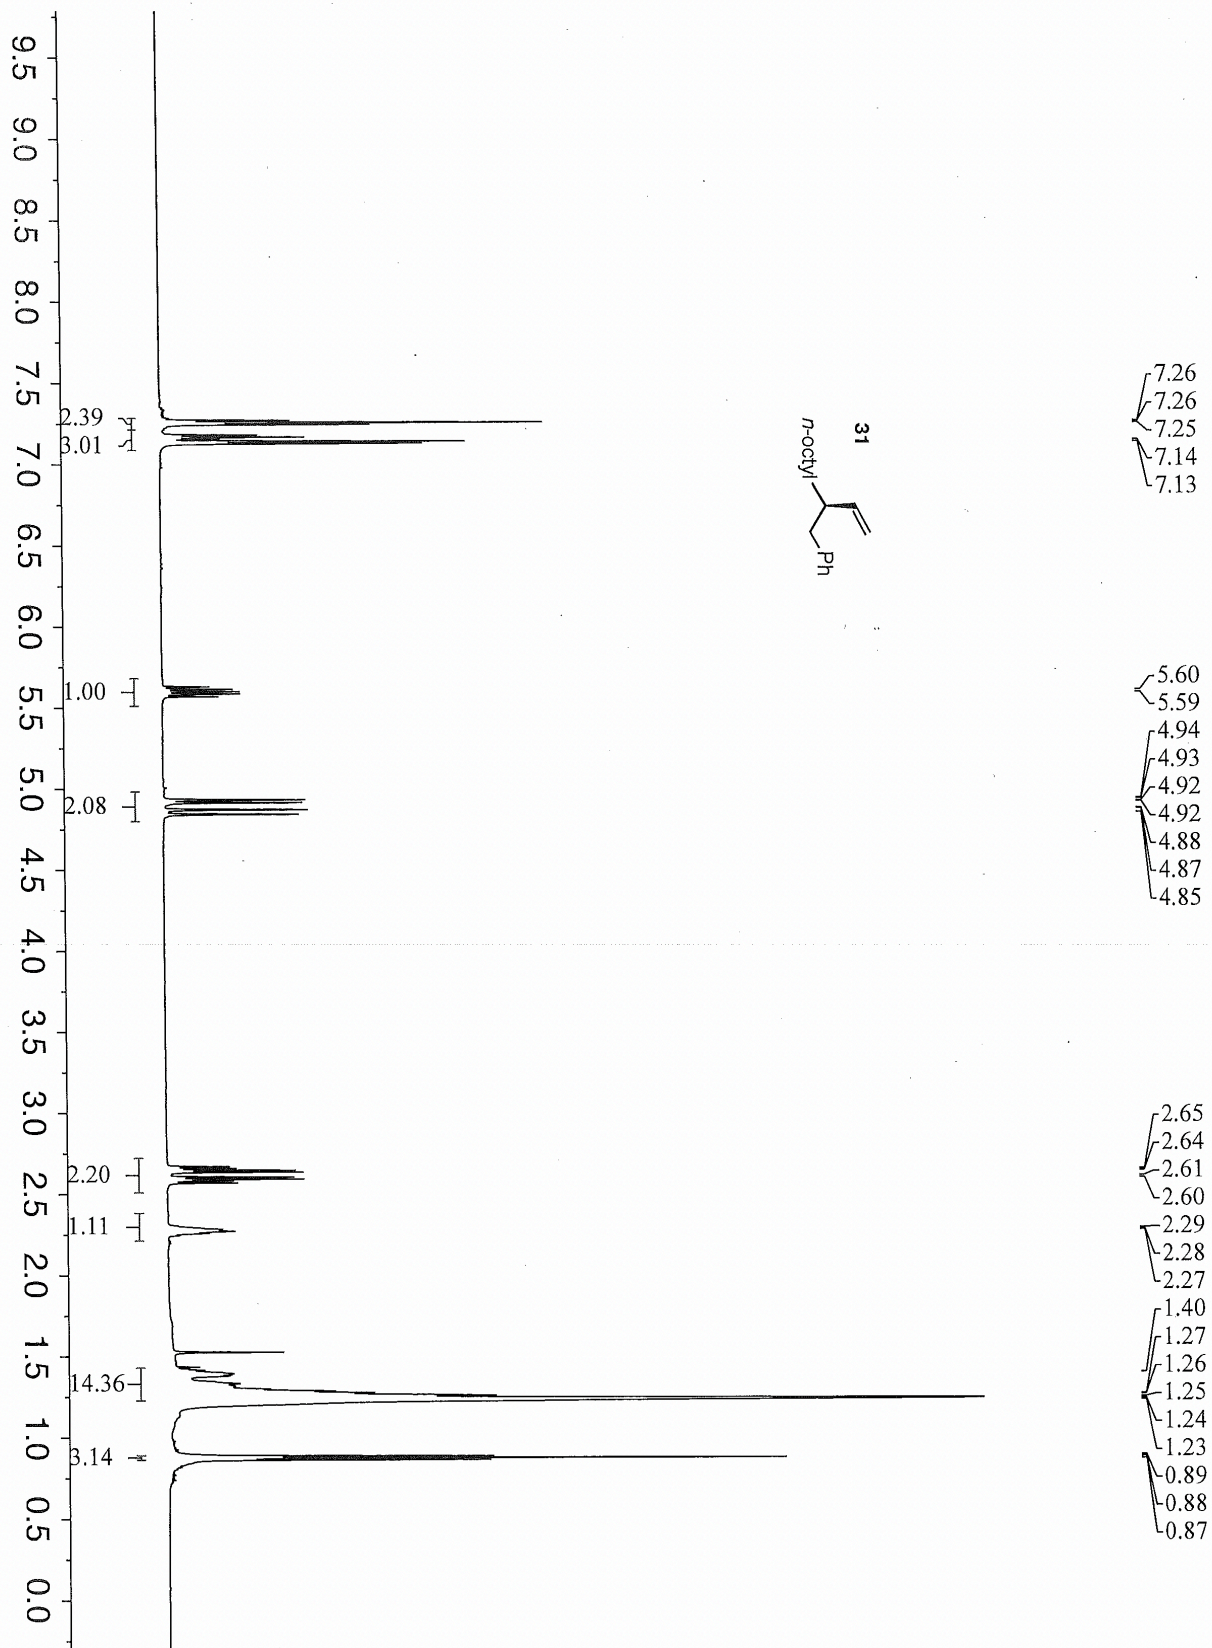

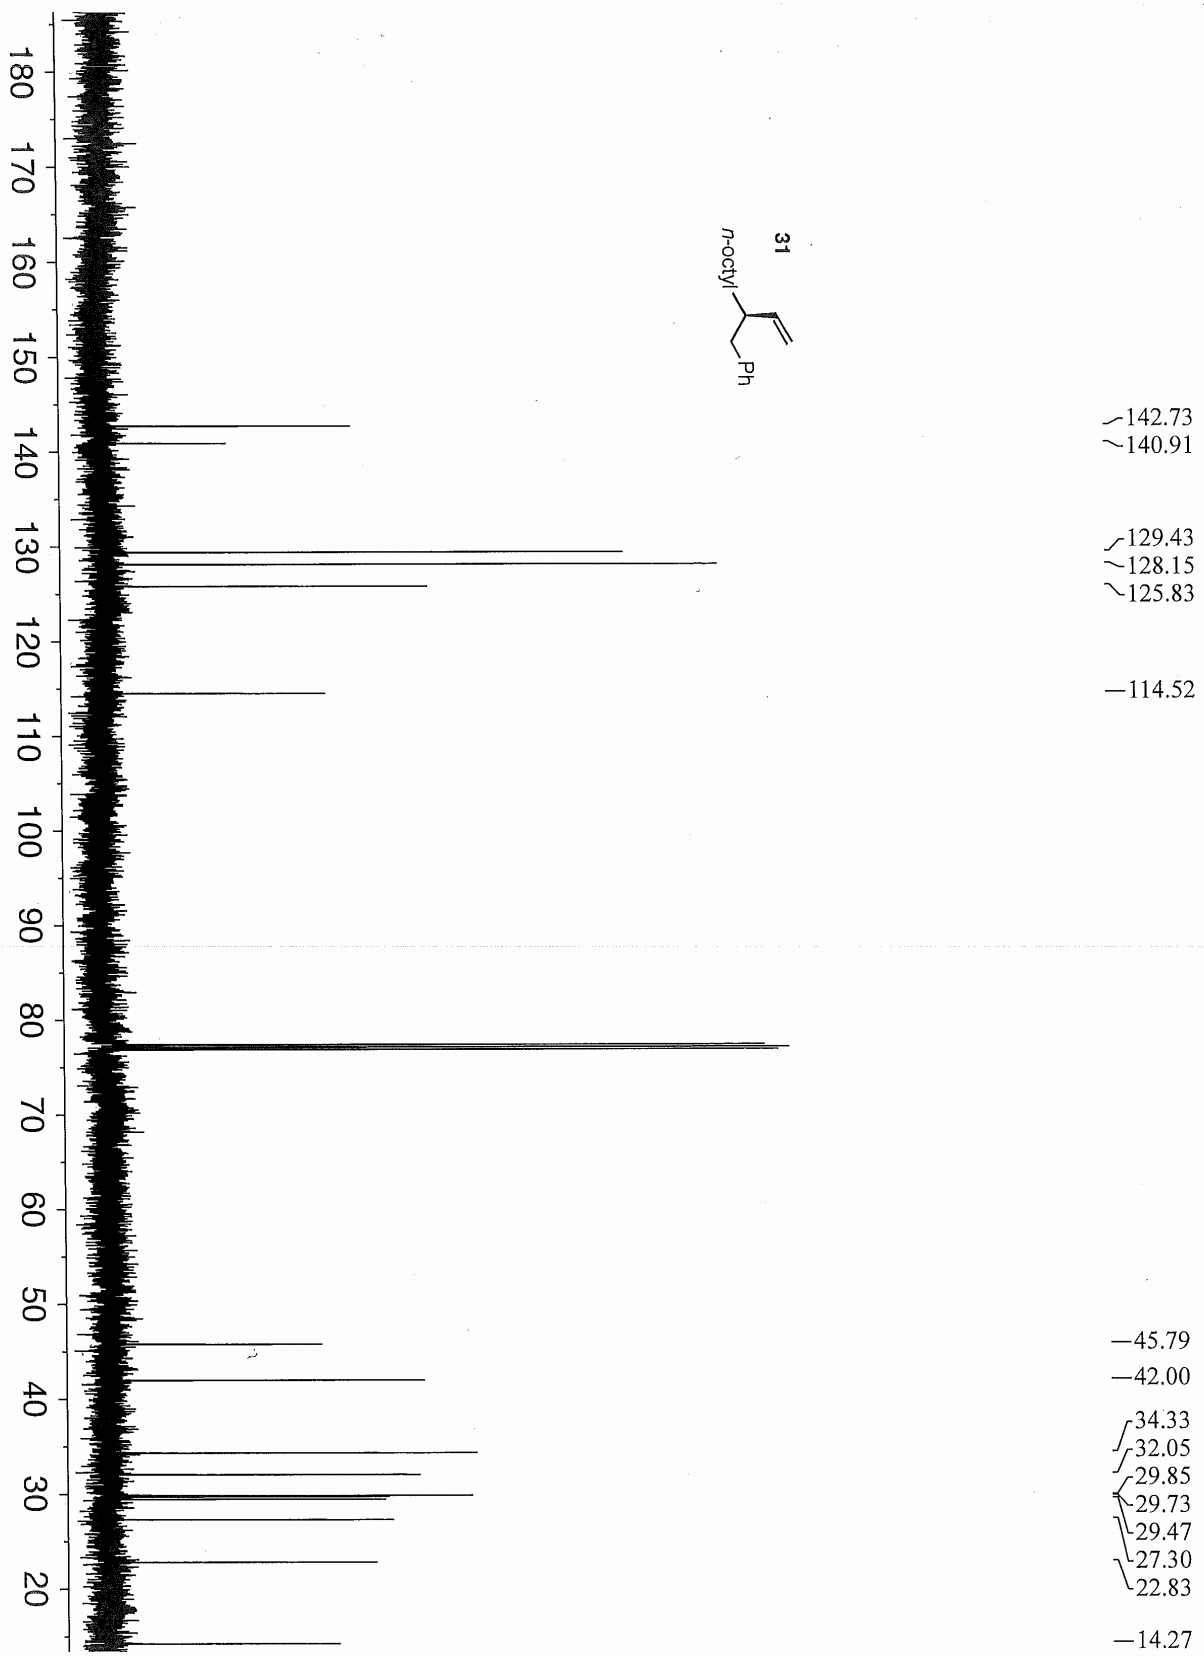

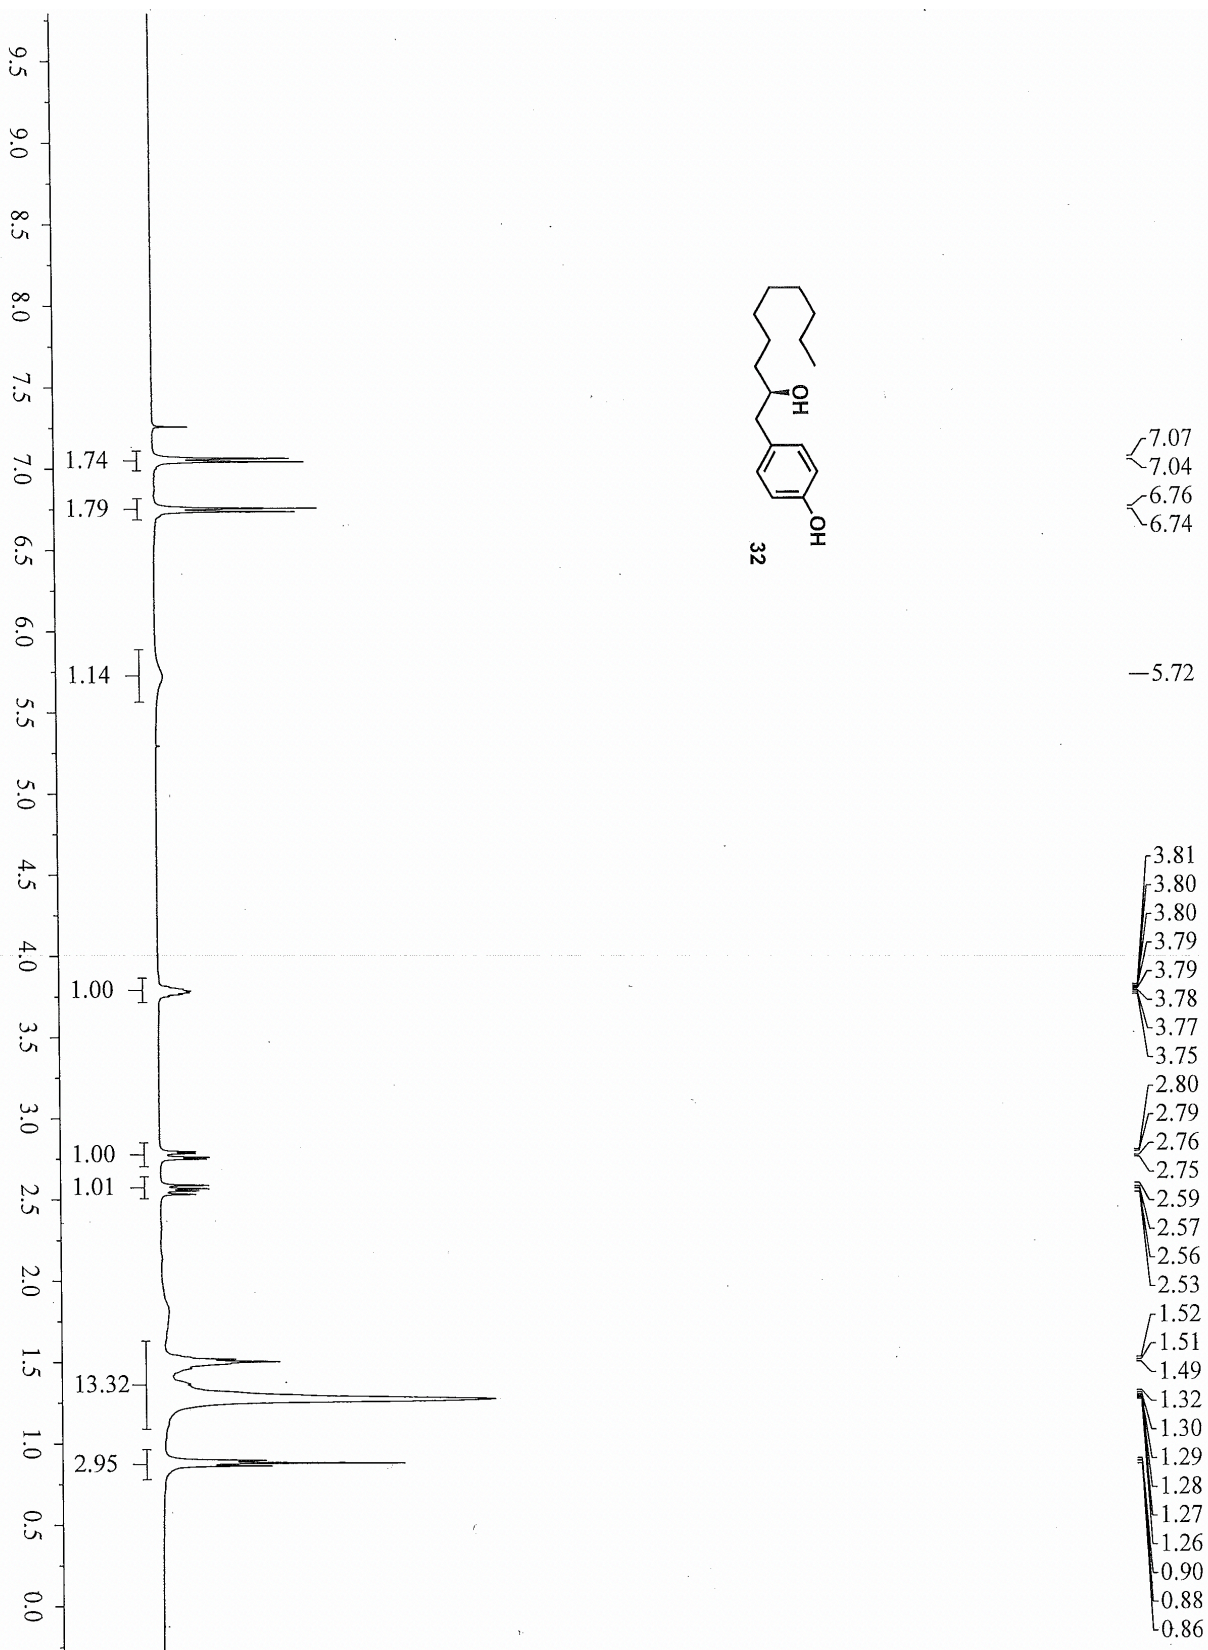

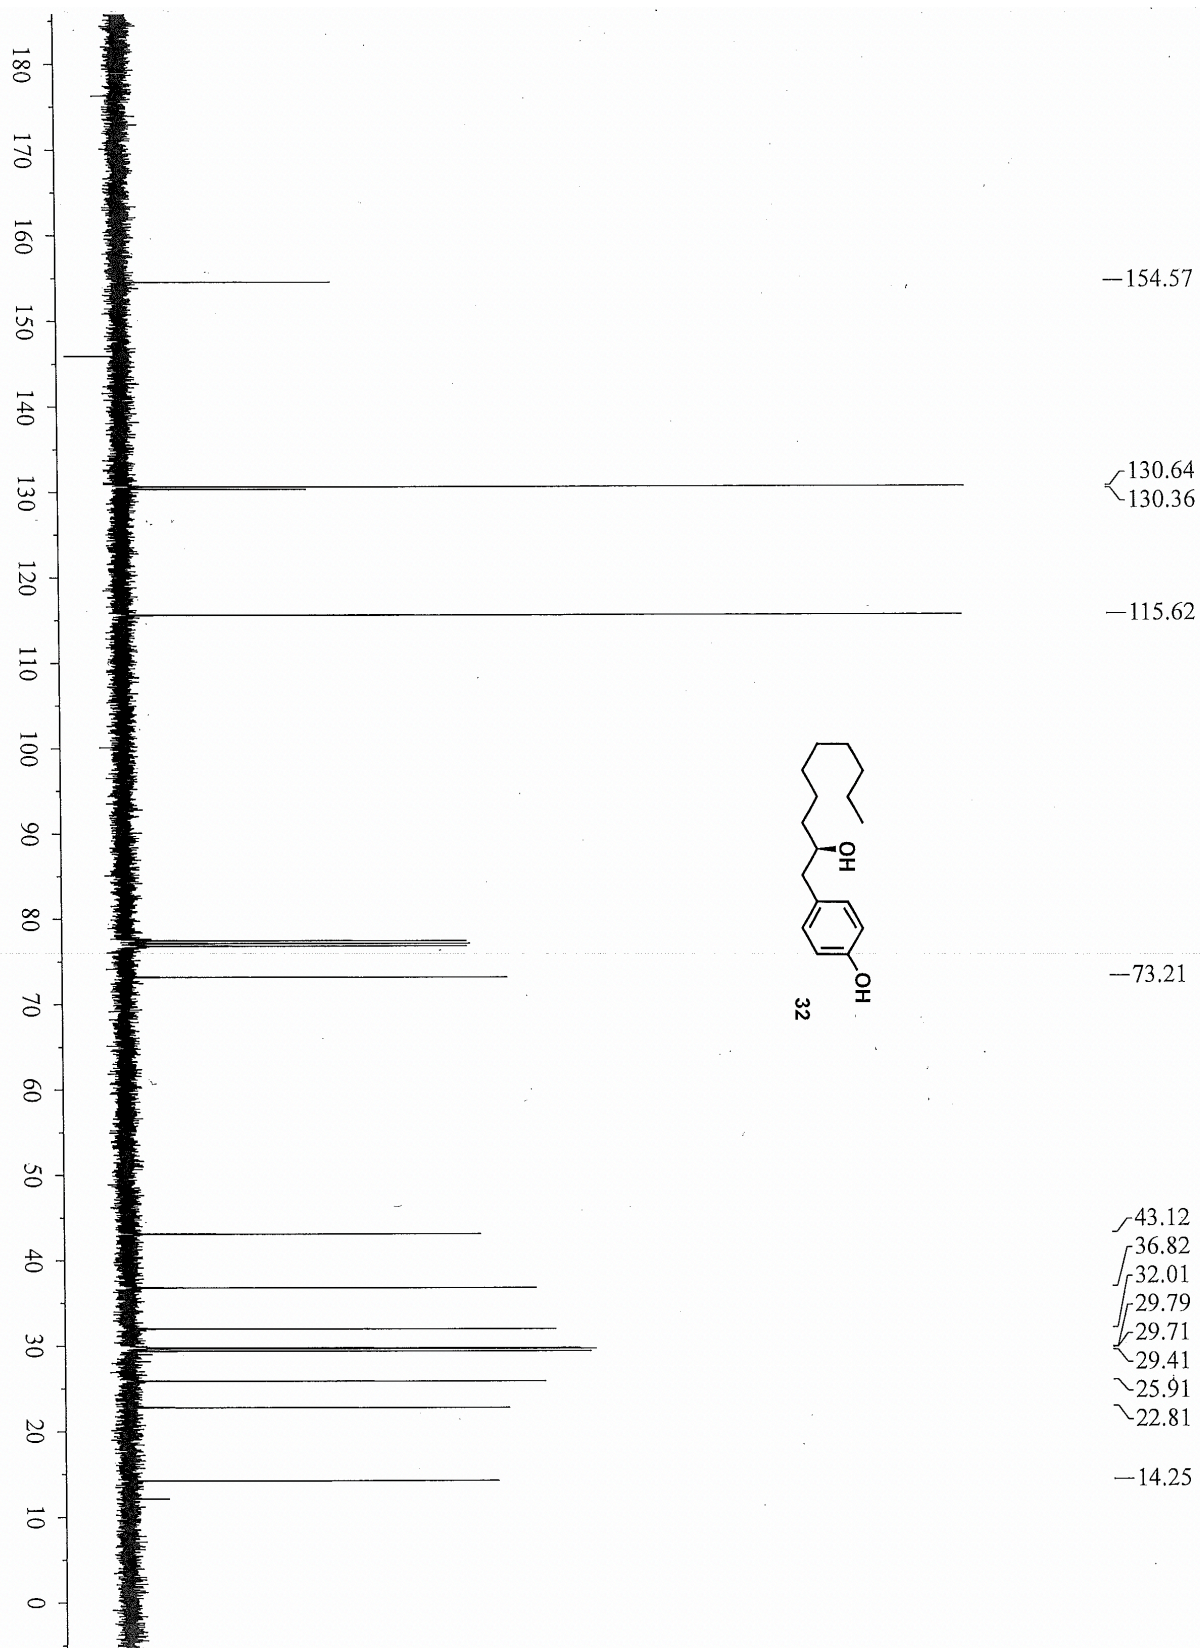

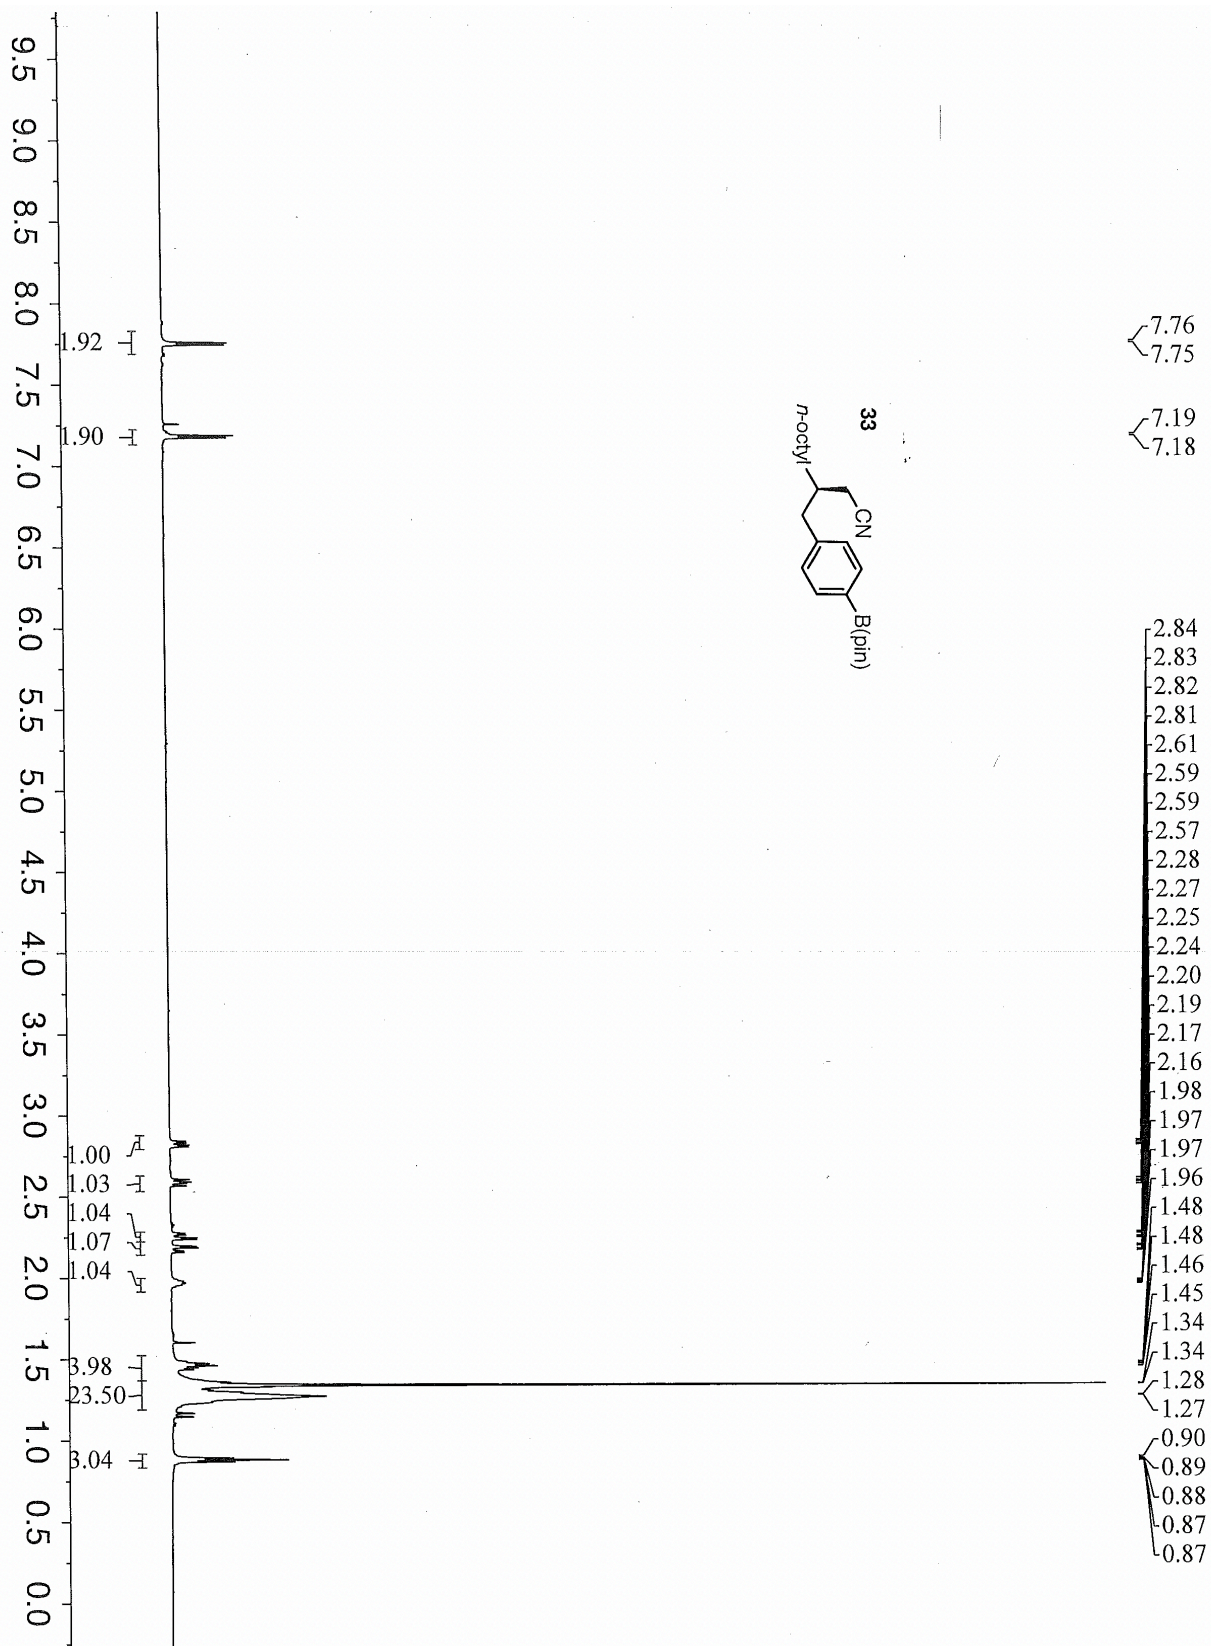



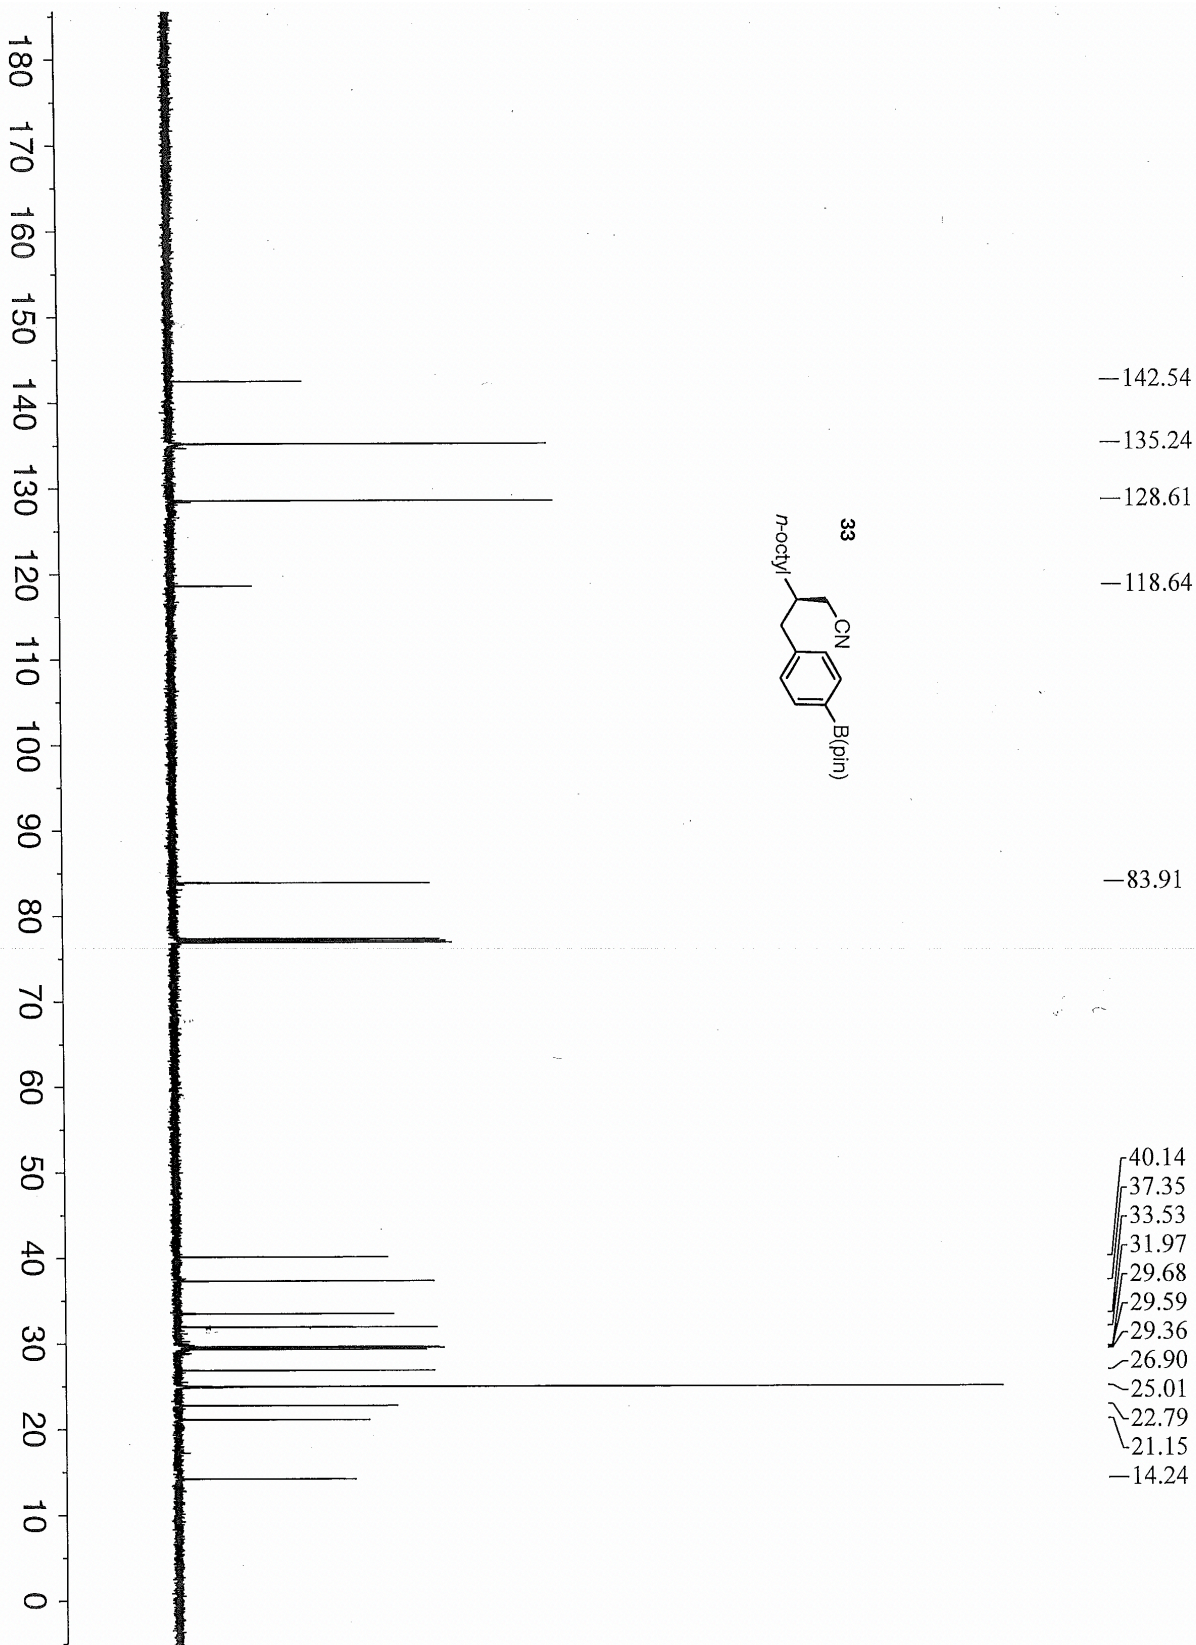

**$^{11}\text{B}$  NMR**

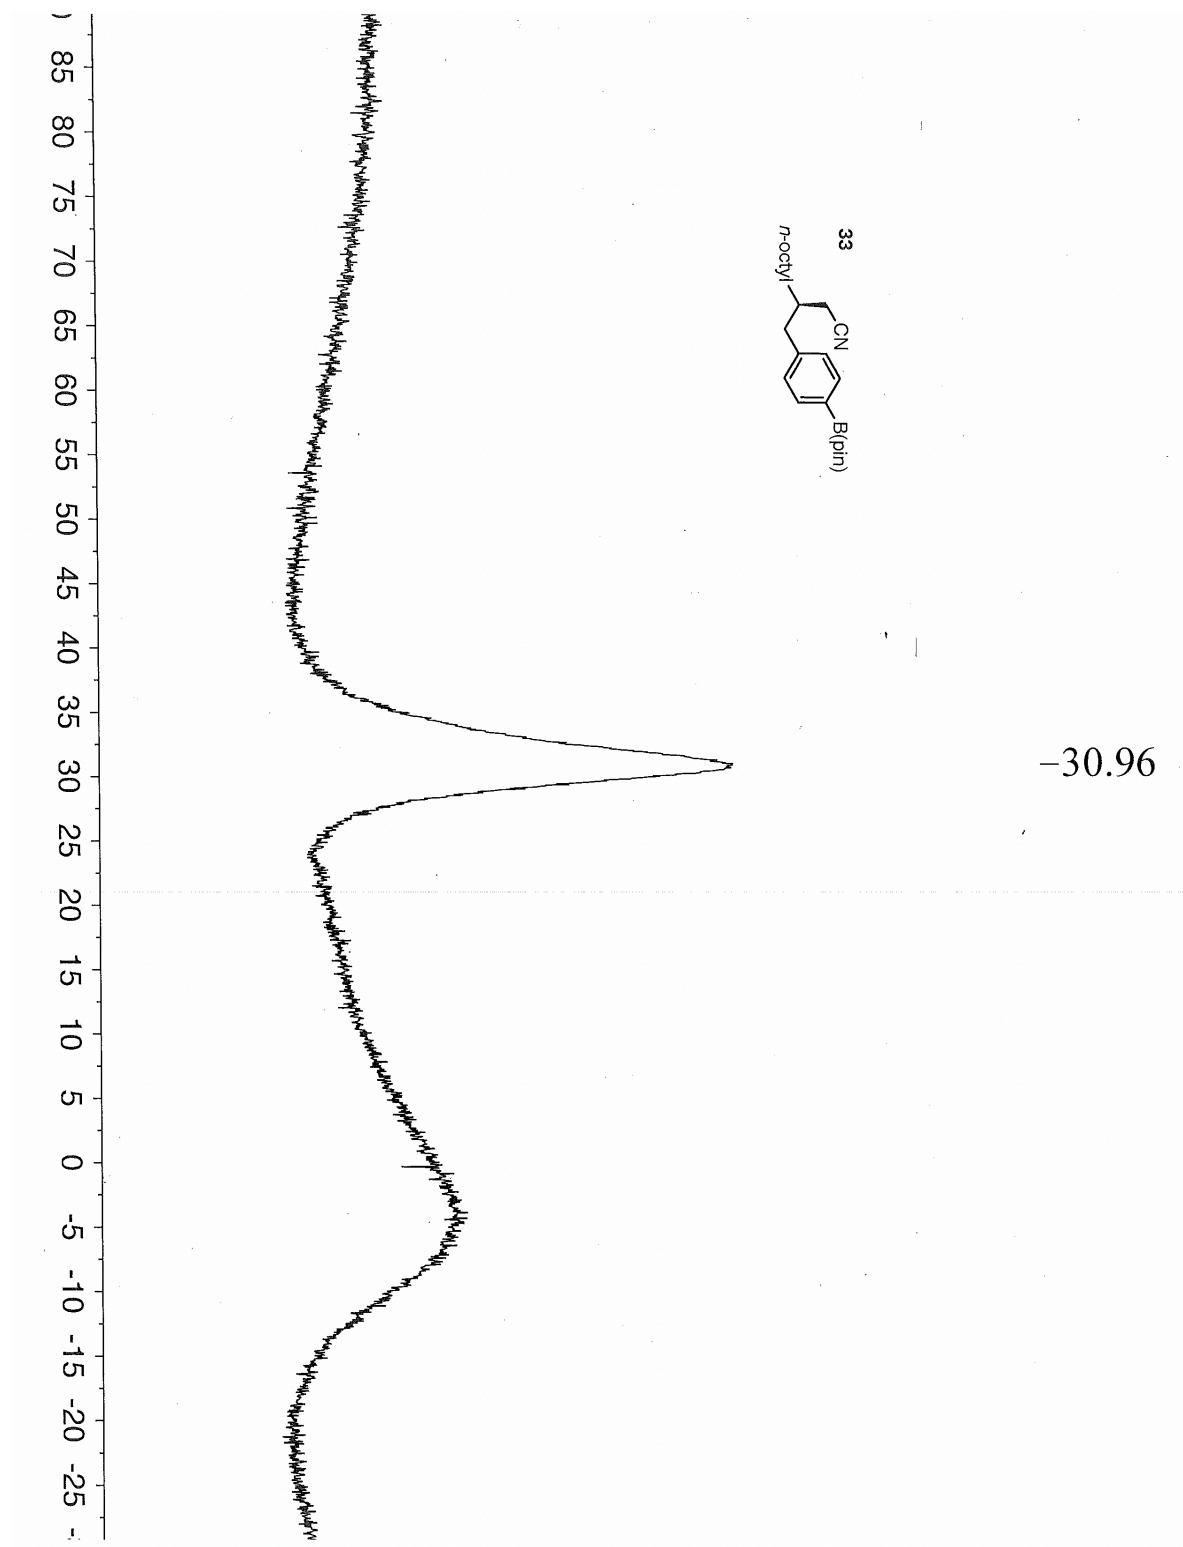

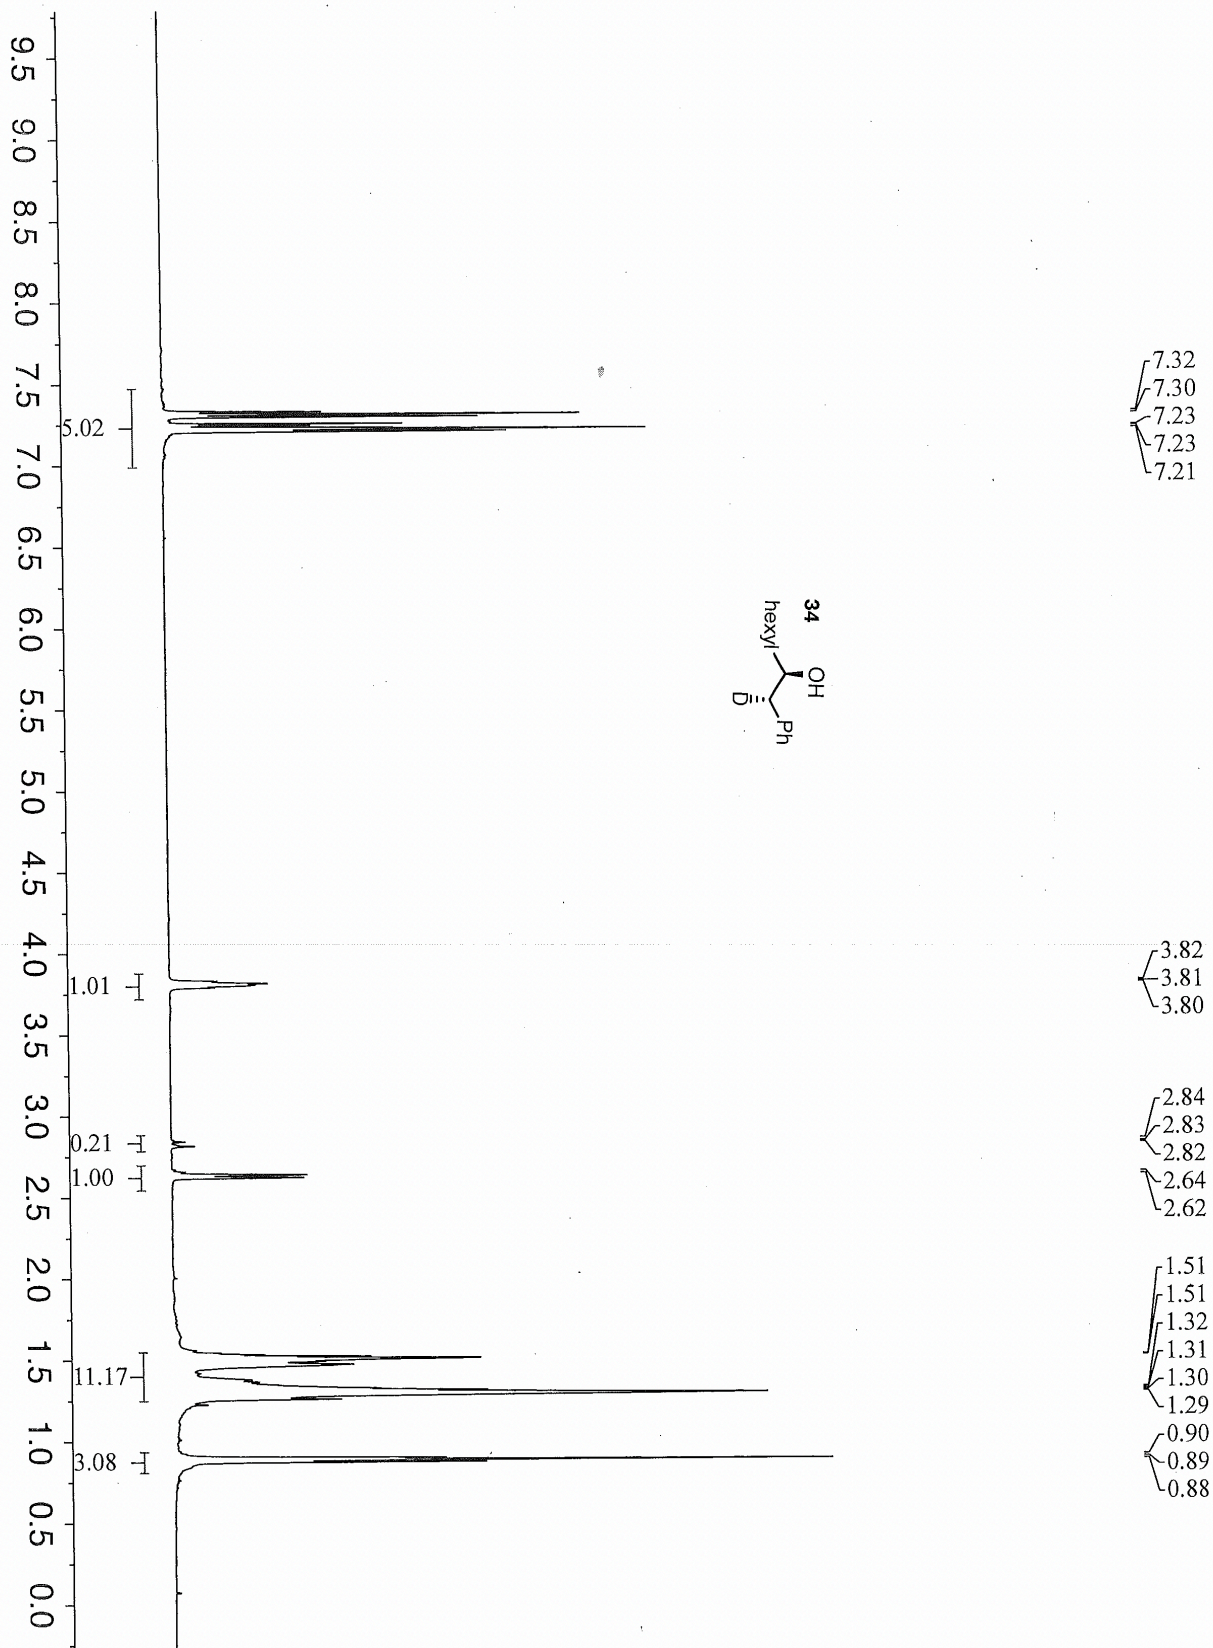

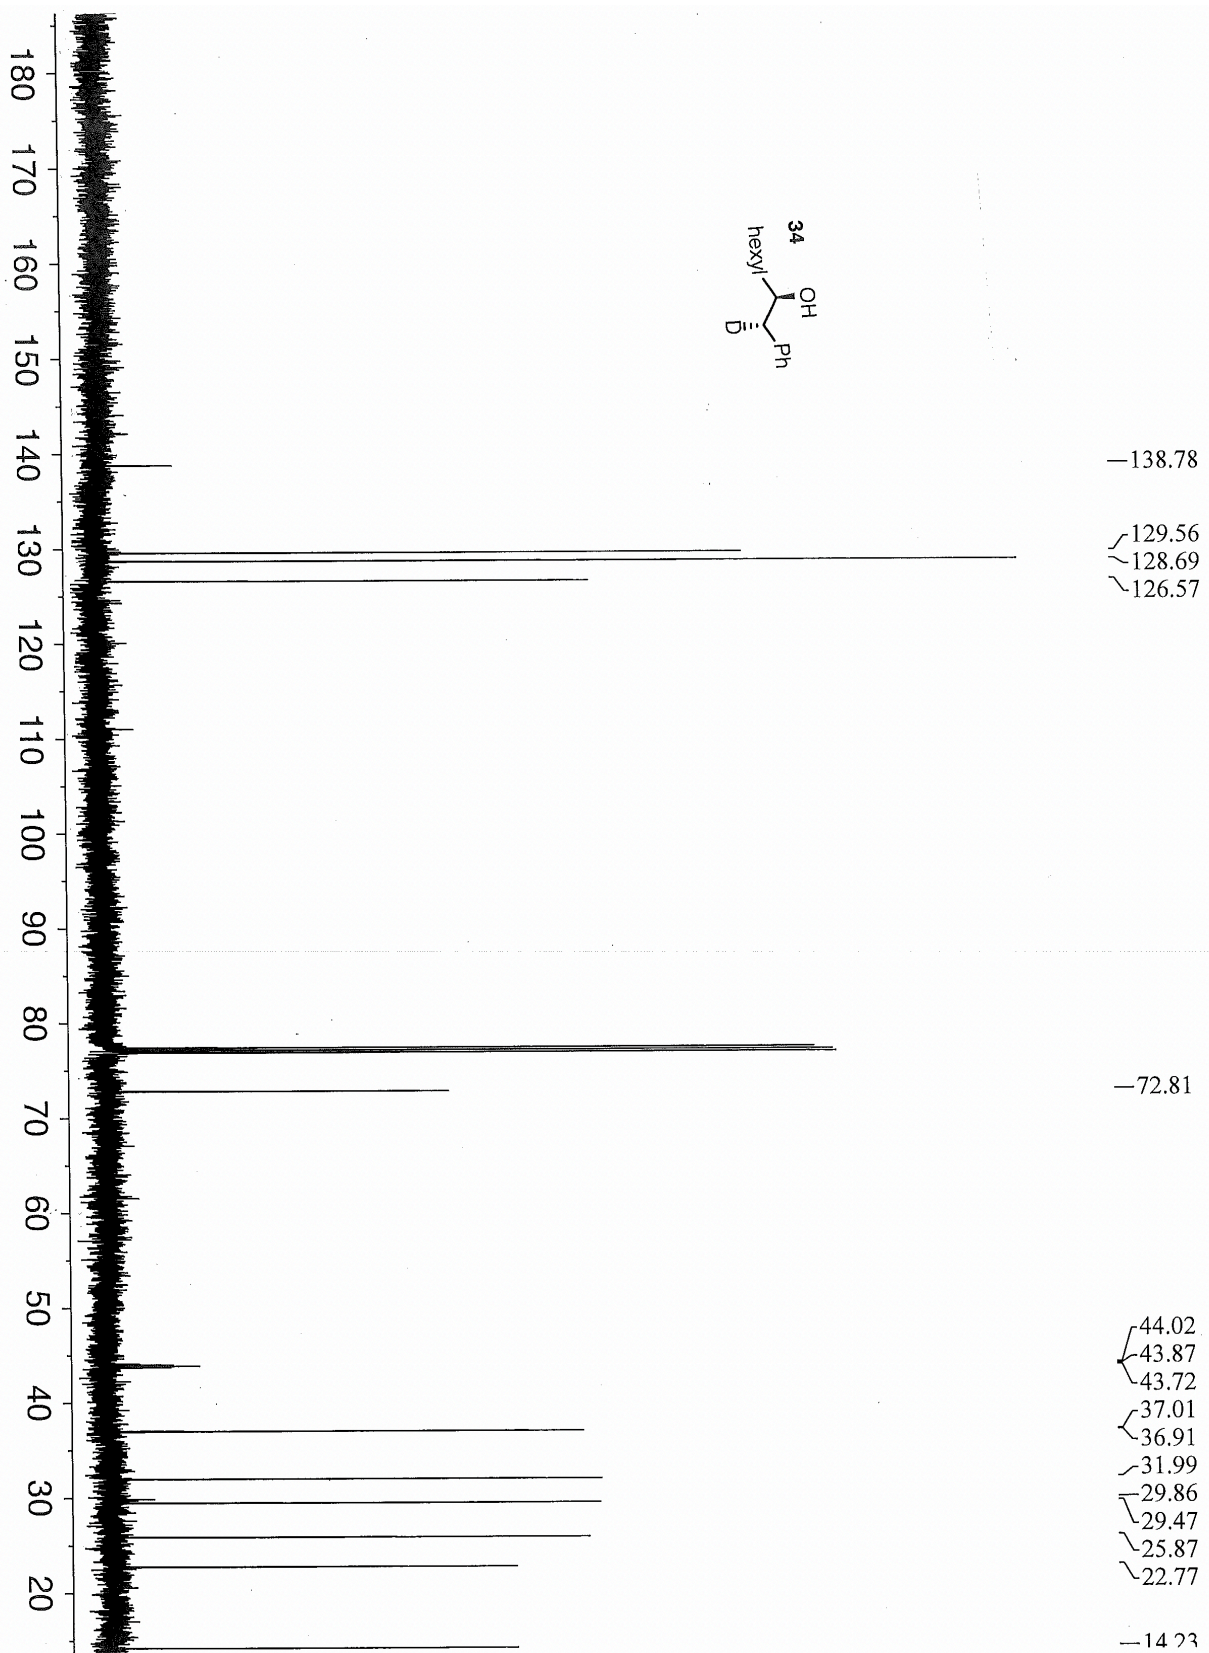



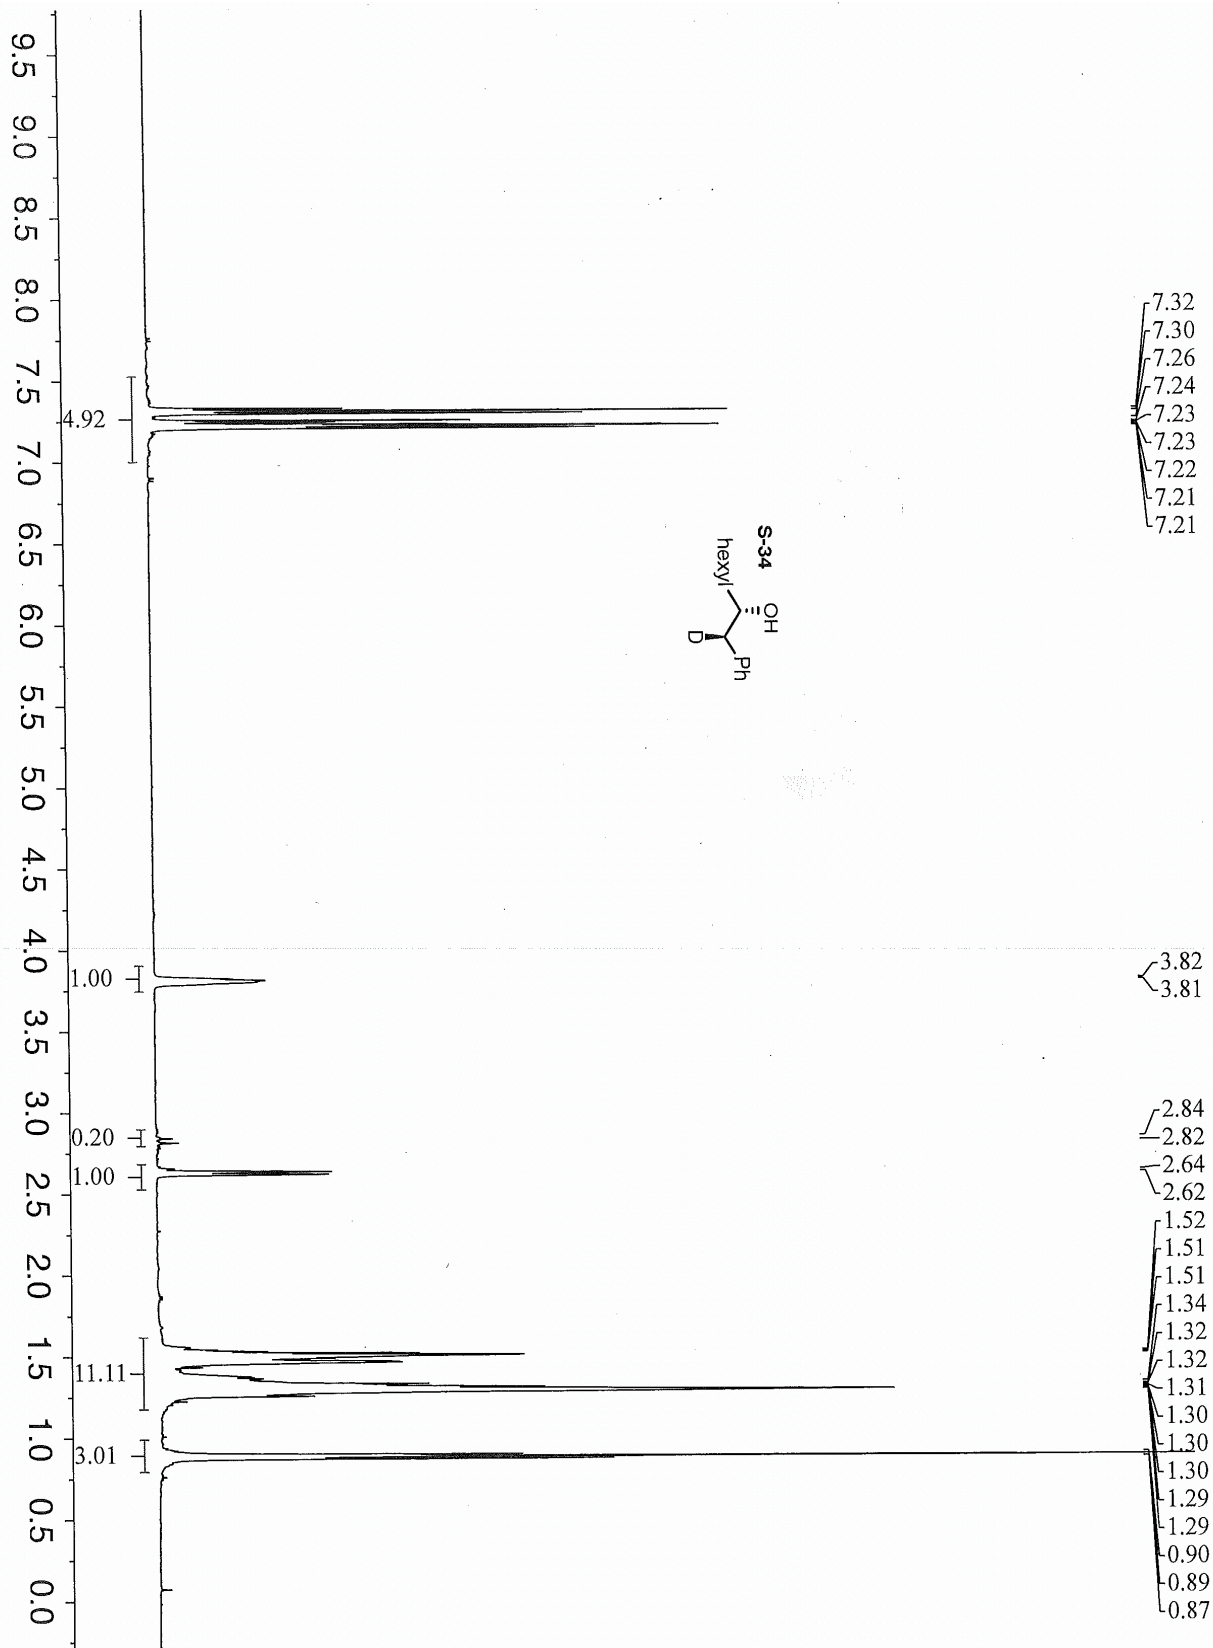



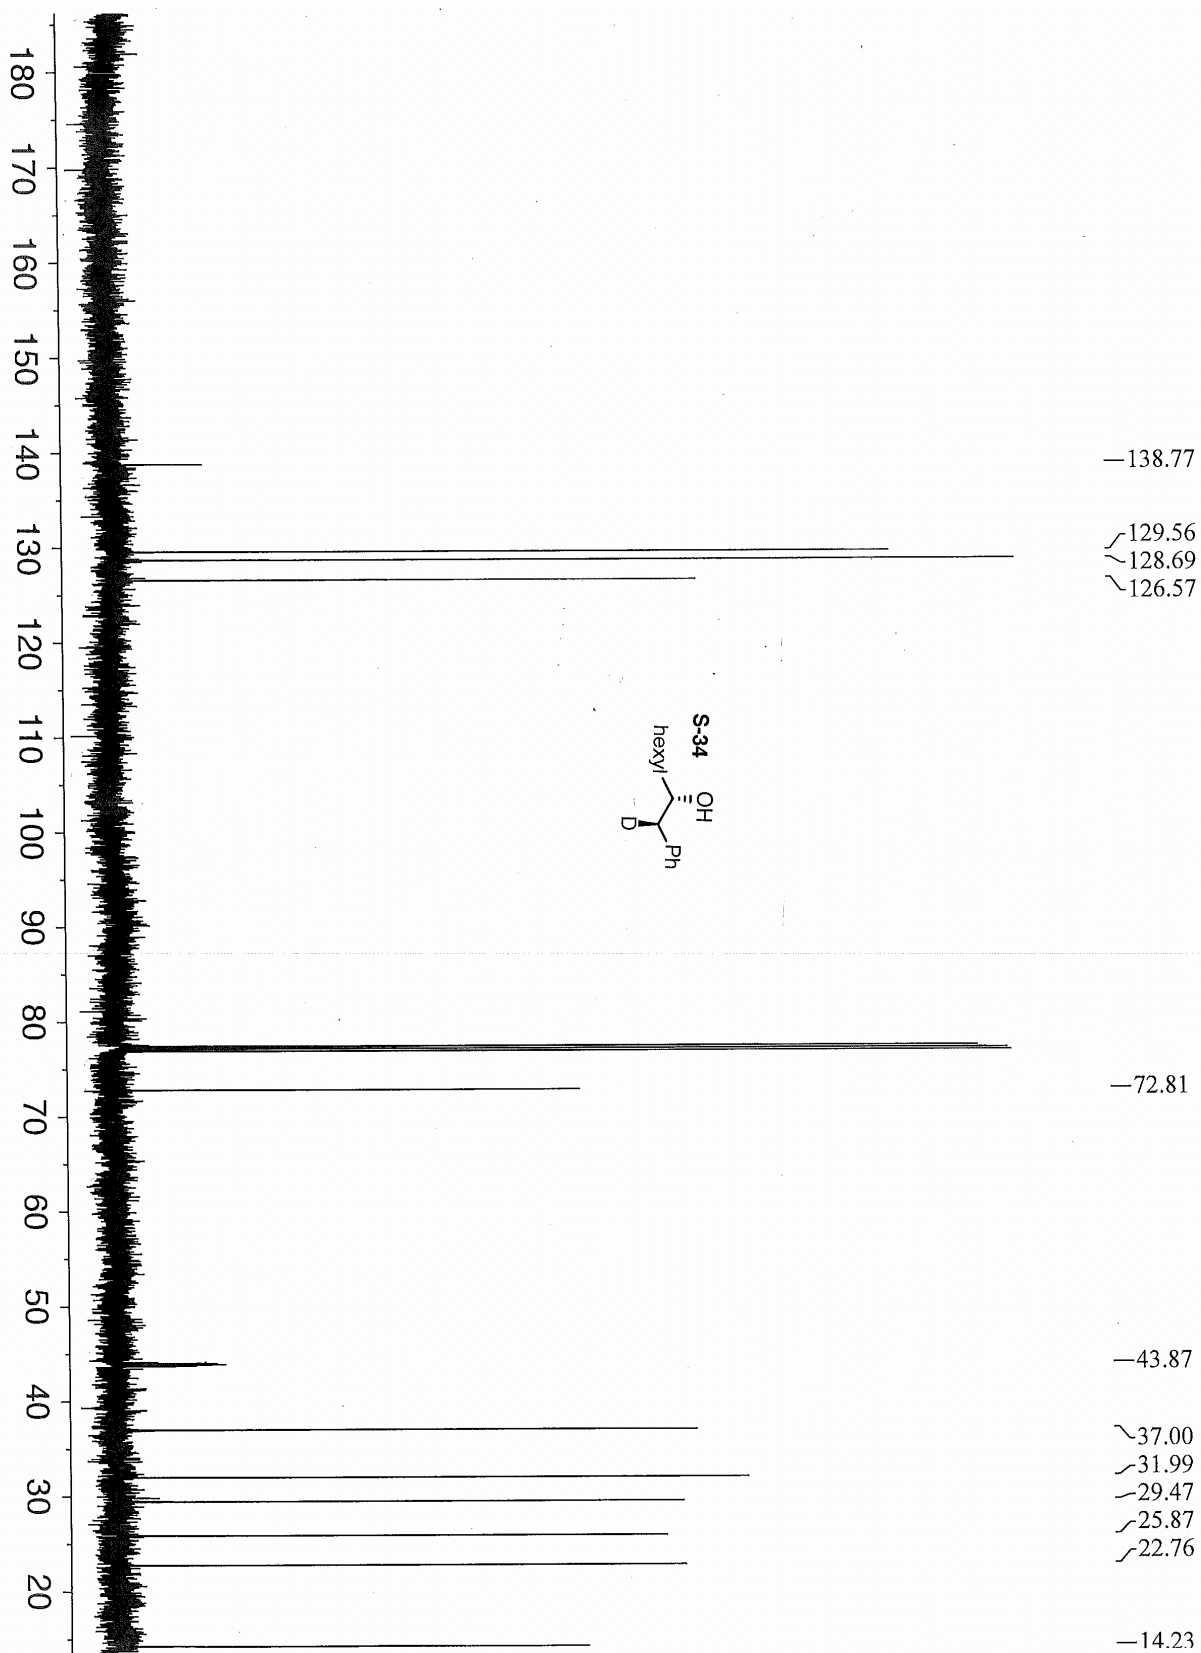

## Crystallographic Data

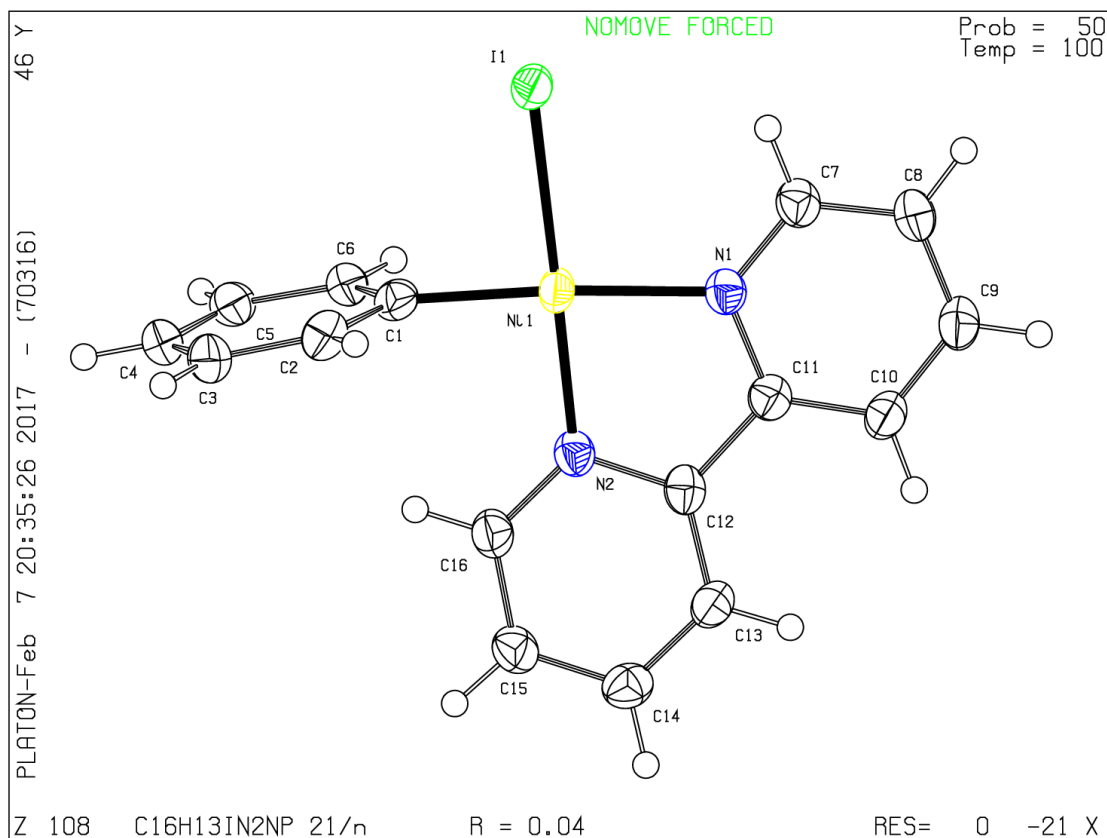

Table 1. Crystal data and structure refinement for C16h13IN2Ni.

|                      |                         |                       |
|----------------------|-------------------------|-----------------------|
| Identification code  | C16H13IN2Ni             |                       |
| Empirical formula    | C16 H13 I N2 Ni         |                       |
| Formula weight       | 418.89                  |                       |
| Temperature          | 100(2) K                |                       |
| Wavelength           | 1.54178 $\approx$       |                       |
| Crystal system       | Monoclinic              |                       |
| Space group          | P2 <sub>1</sub> /n      |                       |
| Unit cell dimensions | a = 8.9583(9) $\approx$ | $\alpha = 90^\circ$ . |
|                      | S-132                   |                       |

*Chierchia, Law, and Morken Supporting Information*

|                                        |                                                                  |                            |
|----------------------------------------|------------------------------------------------------------------|----------------------------|
|                                        | $b = 16.2595(16) \text{ \AA}$                                    | $\beta = 107.788(3)^\circ$ |
|                                        | $c = 10.4132(11) \text{ \AA}$                                    | $\gamma = 90^\circ$        |
| Volume                                 | $1444.2(3) \text{ \AA}^3$                                        |                            |
| Z                                      | 4                                                                |                            |
| Density (Calculated)                   | $1.927 \text{ Mg/m}^3$                                           |                            |
| Absorption coefficient                 | $18.626 \text{ mm}^{-1}$                                         |                            |
| F(000)                                 | 816                                                              |                            |
| Crystal size                           | $0.410 \times 0.220 \times 0.140 \text{ mm}^3$                   |                            |
| Theta range for data collection        | $5.225$ to $66.860^\circ$                                        |                            |
| Index ranges                           | $-10 \leq h \leq 10$ , $-19 \leq k \leq 19$ , $0 \leq l \leq 12$ |                            |
| Reflections collected                  | 2544                                                             |                            |
| Independent reflections                | 2544 [R(int) = 0.0732]                                           |                            |
| Completeness to theta = $66.860^\circ$ | 99.1 %                                                           |                            |
| Absorption correction                  | Semi-empirical from equivalents                                  |                            |
| Max. and min. transmission             | 0.4660 and 0.1797                                                |                            |
| Refinement method                      | Full-matrix least-squares on $F^2$                               |                            |
| Data / restraints / parameters         | 2544 / 0 / 181                                                   |                            |
| Goodness-of-fit on $F^2$               | 1.100                                                            |                            |
| Final R indices [I > 2sigma(I)]        | R1 = 0.0409, wR2 = 0.1099                                        |                            |
| R indices (all data)                   | R1 = 0.0411, wR2 = 0.1102                                        |                            |
| Extinction coefficient                 | n/a                                                              |                            |
| Largest diff. peak and hole            | $1.123$ and $-1.325 \text{ e. \AA}^{-3}$                         |                            |

Table 2. Atomic coordinates ( $\times 10^4$ ) and equivalent isotropic displacement parameters ( $\approx^2 \times 10^3$ ) for C<sub>16</sub>H<sub>13</sub>IN<sub>2</sub>Ni. U(eq) is defined as one third of the trace of the orthogonalized U<sup>ij</sup> tensor.

|       | x       | y       | z       | U(eq) |
|-------|---------|---------|---------|-------|
| I(1)  | 2706(1) | 3600(1) | 8208(1) | 31(1) |
| Ni(1) | 3008(1) | 3743(1) | 5916(1) | 26(1) |
| N(1)  | 2306(4) | 4899(2) | 5566(3) | 27(1) |
| N(2)  | 3570(4) | 3887(2) | 4279(3) | 27(1) |
| C(1)  | 3468(5) | 2608(3) | 5986(4) | 29(1) |
| C(2)  | 4982(5) | 2279(3) | 6452(4) | 34(1) |
| C(3)  | 5260(7) | 1451(3) | 6270(6) | 38(1) |
| C(4)  | 4020(6) | 927(3)  | 5664(5) | 38(1) |
| C(5)  | 2506(6) | 1246(3) | 5230(5) | 33(1) |
| C(6)  | 2240(5) | 2070(3) | 5377(4) | 30(1) |
| C(7)  | 1605(5) | 5376(3) | 6261(4) | 31(1) |
| C(8)  | 1130(5) | 6172(3) | 5886(5) | 32(1) |
| C(9)  | 1354(6) | 6488(3) | 4731(5) | 34(1) |
| C(10) | 2046(5) | 6002(3) | 3990(4) | 31(1) |
| C(11) | 2534(5) | 5217(2) | 4440(4) | 28(1) |
| C(12) | 3327(4) | 4659(2) | 3752(4) | 27(1) |
| C(13) | 3833(5) | 4890(3) | 2679(4) | 31(1) |
| C(14) | 4578(5) | 4330(3) | 2094(4) | 33(1) |
| C(15) | 4798(6) | 3540(3) | 2605(5) | 33(1) |
| C(16) | 4286(5) | 3346(3) | 3693(4) | 32(1) |

Table 3. Bond lengths [ $\approx$ ] and angles [ $\infty$ ] for C16h13IN2Ni.

---

|             |           |
|-------------|-----------|
| I(1)-Ni(1)  | 2.4926(8) |
| Ni(1)-C(1)  | 1.887(4)  |
| Ni(1)-N(2)  | 1.934(4)  |
| Ni(1)-N(1)  | 1.981(3)  |
| N(1)-C(7)   | 1.341(5)  |
| N(1)-C(11)  | 1.352(5)  |
| N(2)-C(16)  | 1.340(6)  |
| N(2)-C(12)  | 1.360(5)  |
| C(1)-C(6)   | 1.398(6)  |
| C(1)-C(2)   | 1.399(6)  |
| C(2)-C(3)   | 1.391(6)  |
| C(2)-H(2)   | 0.9500    |
| C(3)-C(4)   | 1.389(8)  |
| C(3)-H(3)   | 0.9500    |
| C(4)-C(5)   | 1.392(7)  |
| C(4)-H(4)   | 0.9500    |
| C(5)-C(6)   | 1.377(6)  |
| C(5)-H(5)   | 0.9500    |
| C(6)-H(6)   | 0.9500    |
| C(7)-C(8)   | 1.381(6)  |
| C(7)-H(7)   | 0.9500    |
| C(8)-C(9)   | 1.378(7)  |
| C(8)-H(8)   | 0.9500    |
| C(9)-C(10)  | 1.376(6)  |
| C(9)-H(9)   | 0.9500    |
| C(10)-C(11) | 1.383(6)  |
| C(10)-H(10) | 0.9500    |
| C(11)-C(12) | 1.468(6)  |
| C(12)-C(13) | 1.379(6)  |
| C(13)-C(14) | 1.376(6)  |
| C(13)-H(13) | 0.9500    |
| C(14)-C(15) | 1.382(6)  |



*Chierchia, Law, and Morken Supporting Information*

|                  |            |
|------------------|------------|
| C(14)-H(14)      | 0.9500     |
| C(15)-C(16)      | 1.382(7)   |
| C(15)-H(15)      | 0.9500     |
| C(16)-H(16)      | 0.9500     |
|                  |            |
| C(1)-Ni(1)-N(2)  | 92.30(16)  |
| C(1)-Ni(1)-N(1)  | 171.31(16) |
| N(2)-Ni(1)-N(1)  | 82.84(14)  |
| C(1)-Ni(1)-I(1)  | 87.61(12)  |
| N(2)-Ni(1)-I(1)  | 171.36(11) |
| N(1)-Ni(1)-I(1)  | 98.28(10)  |
| C(7)-N(1)-C(11)  | 117.8(4)   |
| C(7)-N(1)-Ni(1)  | 128.6(3)   |
| C(11)-N(1)-Ni(1) | 113.6(3)   |
| C(16)-N(2)-C(12) | 117.5(4)   |
| C(16)-N(2)-Ni(1) | 127.7(3)   |
| C(12)-N(2)-Ni(1) | 114.5(3)   |
| C(6)-C(1)-C(2)   | 117.6(4)   |
| C(6)-C(1)-Ni(1)  | 117.5(3)   |
| C(2)-C(1)-Ni(1)  | 124.4(3)   |
| C(3)-C(2)-C(1)   | 121.1(4)   |
| C(3)-C(2)-H(2)   | 119.4      |
| C(1)-C(2)-H(2)   | 119.4      |
| C(4)-C(3)-C(2)   | 120.2(5)   |
| C(4)-C(3)-H(3)   | 119.9      |
| C(2)-C(3)-H(3)   | 119.9      |
| C(3)-C(4)-C(5)   | 118.9(4)   |
| C(3)-C(4)-H(4)   | 120.5      |
| C(5)-C(4)-H(4)   | 120.5      |
| C(6)-C(5)-C(4)   | 120.7(5)   |
| C(6)-C(5)-H(5)   | 119.7      |
| C(4)-C(5)-H(5)   | 119.7      |
| C(5)-C(6)-C(1)   | 121.3(4)   |
| C(5)-C(6)-H(6)   | 119.3      |

*Chierchia, Law, and Morken Supporting Information*

|                   |          |
|-------------------|----------|
| C(1)-C(6)-H(6)    | 119.3    |
| N(1)-C(7)-C(8)    | 122.9(4) |
| N(1)-C(7)-H(7)    | 118.5    |
| C(8)-C(7)-H(7)    | 118.5    |
| C(9)-C(8)-C(7)    | 118.8(4) |
| C(9)-C(8)-H(8)    | 120.6    |
| C(7)-C(8)-H(8)    | 120.6    |
| C(10)-C(9)-C(8)   | 119.1(4) |
| C(10)-C(9)-H(9)   | 120.5    |
| C(8)-C(9)-H(9)    | 120.5    |
| C(9)-C(10)-C(11)  | 119.3(4) |
| C(9)-C(10)-H(10)  | 120.3    |
| C(11)-C(10)-H(10) | 120.3    |
| N(1)-C(11)-C(10)  | 122.1(4) |
| N(1)-C(11)-C(12)  | 114.2(4) |
| C(10)-C(11)-C(12) | 123.7(4) |
| N(2)-C(12)-C(13)  | 121.7(4) |
| N(2)-C(12)-C(11)  | 114.5(4) |
| C(13)-C(12)-C(11) | 123.7(4) |
| C(14)-C(13)-C(12) | 120.2(4) |
| C(14)-C(13)-H(13) | 119.9    |
| C(12)-C(13)-H(13) | 119.9    |
| C(13)-C(14)-C(15) | 118.4(4) |
| C(13)-C(14)-H(14) | 120.8    |
| C(15)-C(14)-H(14) | 120.8    |
| C(14)-C(15)-C(16) | 118.9(4) |
| C(14)-C(15)-H(15) | 120.5    |
| C(16)-C(15)-H(15) | 120.5    |
| N(2)-C(16)-C(15)  | 123.2(4) |
| N(2)-C(16)-H(16)  | 118.4    |
| C(15)-C(16)-H(16) | 118.4    |

---

Symmetry transformations used to generate equivalent atoms:

Table 4. Anisotropic displacement parameters ( $\approx 2 \times 10^3$ ) for C16h13IN2Ni. The anisotropic displacement factor exponent takes the form:  $-2\pi^2 [ h^2 a^{*2} U^{11} + \dots + 2 h k a^* b^* U^{12} ]$

|       | U <sup>11</sup> | U <sup>22</sup> | U <sup>33</sup> | U <sup>23</sup> | U <sup>13</sup> | U <sup>12</sup> |
|-------|-----------------|-----------------|-----------------|-----------------|-----------------|-----------------|
| I(1)  | 43(1)           | 24(1)           | 26(1)           | 2(1)            | 11(1)           | 2(1)            |
| Ni(1) | 33(1)           | 18(1)           | 26(1)           | 1(1)            | 8(1)            | 2(1)            |
| N(1)  | 28(2)           | 24(2)           | 27(2)           | -1(1)           | 7(1)            | 0(1)            |
| N(2)  | 30(2)           | 23(2)           | 26(2)           | -2(1)           | 6(1)            | 1(1)            |
| C(1)  | 38(2)           | 27(2)           | 23(2)           | 2(2)            | 11(2)           | 0(2)            |
| C(2)  | 36(2)           | 31(2)           | 33(2)           | 5(2)            | 8(2)            | 0(2)            |
| C(3)  | 43(3)           | 34(3)           | 39(3)           | 8(2)            | 17(2)           | 14(2)           |
| C(4)  | 57(3)           | 25(2)           | 41(2)           | 1(2)            | 27(2)           | 7(2)            |
| C(5)  | 48(3)           | 26(2)           | 31(2)           | -5(2)           | 18(2)           | -5(2)           |
| C(6)  | 37(2)           | 24(2)           | 32(2)           | -1(2)           | 16(2)           | 1(2)            |
| C(7)  | 35(2)           | 27(2)           | 28(2)           | -3(2)           | 6(2)            | -1(2)           |
| C(8)  | 35(2)           | 24(2)           | 36(2)           | -5(2)           | 9(2)            | 1(2)            |
| C(9)  | 40(2)           | 23(2)           | 37(3)           | 1(2)            | 9(2)            | 2(2)            |
| C(10) | 39(2)           | 25(2)           | 29(2)           | 4(2)            | 9(2)            | -1(2)           |
| C(11) | 29(2)           | 26(2)           | 26(2)           | -2(2)           | 6(2)            | -2(2)           |
| C(12) | 27(2)           | 23(2)           | 27(2)           | -4(2)           | 2(2)            | -3(2)           |
| C(13) | 37(2)           | 26(2)           | 29(2)           | 4(2)            | 9(2)            | -2(2)           |
| C(14) | 38(2)           | 35(2)           | 26(2)           | -2(2)           | 9(2)            | -5(2)           |
| C(15) | 39(2)           | 30(2)           | 29(2)           | -5(2)           | 10(2)           | 1(2)            |
| C(16) | 39(2)           | 25(2)           | 31(2)           | -1(2)           | 10(2)           | 3(2)            |

Table 5. Hydrogen coordinates ( $\times 10^4$ ) and isotropic displacement parameters ( $\approx 2 \times 10^{-3}$ ) for C16h13IN2Ni.

|       | x    | y    | z    | U(eq) |
|-------|------|------|------|-------|
| H(2)  | 5835 | 2626 | 6900 | 40    |
| H(3)  | 6301 | 1244 | 6561 | 45    |
| H(4)  | 4202 | 360  | 5549 | 45    |
| H(5)  | 1647 | 891  | 4829 | 40    |
| H(6)  | 1199 | 2276 | 5057 | 36    |
| H(7)  | 1428 | 5156 | 7047 | 37    |
| H(8)  | 656  | 6496 | 6415 | 39    |
| H(9)  | 1036 | 7033 | 4449 | 40    |
| H(10) | 2186 | 6203 | 3179 | 37    |
| H(13) | 3666 | 5436 | 2344 | 37    |
| H(14) | 4932 | 4484 | 1356 | 40    |
| H(15) | 5293 | 3137 | 2215 | 40    |
| H(16) | 4448 | 2802 | 4042 | 38    |

Table 6. Torsion angles [ $^{\circ}$ ] for C16h13IN2Ni.

---

|                         |           |
|-------------------------|-----------|
| N(2)-Ni(1)-C(1)-C(6)    | -92.5(3)  |
| I(1)-Ni(1)-C(1)-C(6)    | 96.2(3)   |
| N(2)-Ni(1)-C(1)-C(2)    | 79.1(4)   |
| I(1)-Ni(1)-C(1)-C(2)    | -92.3(3)  |
| C(6)-C(1)-C(2)-C(3)     | 2.3(6)    |
| Ni(1)-C(1)-C(2)-C(3)    | -169.2(4) |
| C(1)-C(2)-C(3)-C(4)     | -2.5(7)   |
| C(2)-C(3)-C(4)-C(5)     | 0.8(7)    |
| C(3)-C(4)-C(5)-C(6)     | 1.1(7)    |
| C(4)-C(5)-C(6)-C(1)     | -1.3(7)   |
| C(2)-C(1)-C(6)-C(5)     | -0.4(6)   |
| Ni(1)-C(1)-C(6)-C(5)    | 171.7(3)  |
| C(11)-N(1)-C(7)-C(8)    | -0.8(6)   |
| Ni(1)-N(1)-C(7)-C(8)    | -178.0(3) |
| N(1)-C(7)-C(8)-C(9)     | 1.4(7)    |
| C(7)-C(8)-C(9)-C(10)    | -0.1(7)   |
| C(8)-C(9)-C(10)-C(11)   | -1.6(7)   |
| C(7)-N(1)-C(11)-C(10)   | -1.1(6)   |
| Ni(1)-N(1)-C(11)-C(10)  | 176.6(3)  |
| C(7)-N(1)-C(11)-C(12)   | 179.2(3)  |
| Ni(1)-N(1)-C(11)-C(12)  | -3.1(4)   |
| C(9)-C(10)-C(11)-N(1)   | 2.3(6)    |
| C(9)-C(10)-C(11)-C(12)  | -178.0(4) |
| C(16)-N(2)-C(12)-C(13)  | -1.8(6)   |
| Ni(1)-N(2)-C(12)-C(13)  | 172.4(3)  |
| C(16)-N(2)-C(12)-C(11)  | 179.8(4)  |
| Ni(1)-N(2)-C(12)-C(11)  | -6.0(4)   |
| N(1)-C(11)-C(12)-N(2)   | 6.0(5)    |
| C(10)-C(11)-C(12)-N(2)  | -173.7(4) |
| N(1)-C(11)-C(12)-C(13)  | -172.4(4) |
| C(10)-C(11)-C(12)-C(13) | 7.9(6)    |
| N(2)-C(12)-C(13)-C(14)  | 1.3(6)    |



*Chierchia, Law, and Morken Supporting Information*

|                         |           |
|-------------------------|-----------|
| C(11)-C(12)-C(13)-C(14) | 179.5(4)  |
| C(12)-C(13)-C(14)-C(15) | 0.1(6)    |
| C(13)-C(14)-C(15)-C(16) | -1.0(7)   |
| C(12)-N(2)-C(16)-C(15)  | 0.9(6)    |
| Ni(1)-N(2)-C(16)-C(15)  | -172.4(3) |
| C(14)-C(15)-C(16)-N(2)  | 0.5(7)    |

---

Symmetry transformations used to generate equivalent atoms:

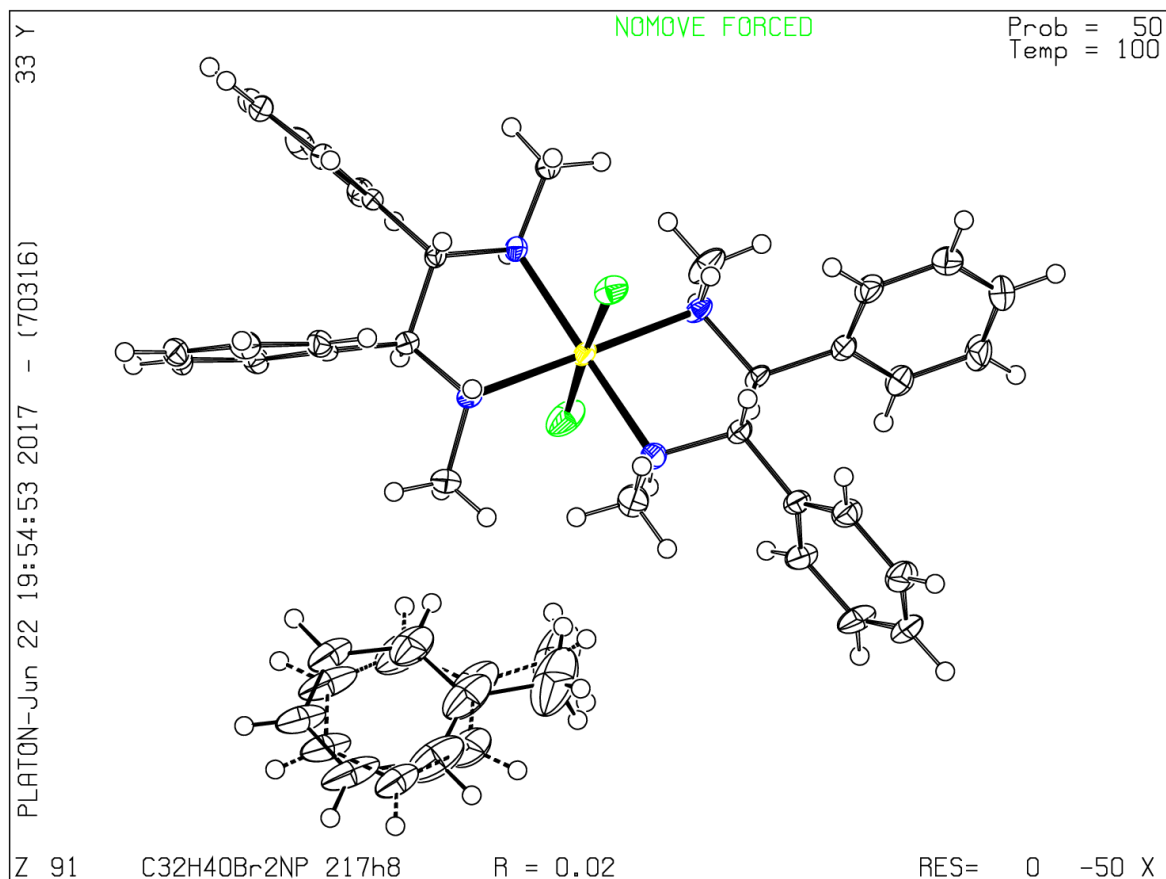

Crystal was obtained by vapor diffusion with pentane from a 1:1 metal to ligand solution in toluene. In an argon filled glove box Nickel(II) bromide 2-methoxyethyl ether complex (17.6 mg 0.05 mmol) and (1*S*,2*S*)-*N,N'*-Dimethyl-1,2-diphenyl-1,2-ethylenediamine (12.0 mg, 0.05 mmol) were placed in a 2-dram vial with 3 mL of toluene. After stirring at r.t. for 2 hours, the solution was filtered through an acro-disk syringe filter in a 1-dram vial which was then placed in scintillation vial filled with 2 mL of dry pentane. The vial was capped and kept at room temperature. Blue crystals were observable after 4 days.

Table 1. Crystal data and structure refinement for  $\text{C}_{32}\text{H}_{40}\text{Br}_2\text{N}_4\text{Ni}(\text{C}_7\text{H}_8)$ .

|                                         |                                                                                  |                               |
|-----------------------------------------|----------------------------------------------------------------------------------|-------------------------------|
| Identification code                     | $\text{C}_{32}\text{H}_{40}\text{Br}_2\text{N}_4\text{Ni}(\text{C}_7\text{H}_8)$ |                               |
| Empirical formula                       | $\text{C}_{39}\text{H}_{48}\text{Br}_2\text{N}_4\text{Ni}$                       |                               |
| Formula weight                          | 791.34                                                                           |                               |
| Temperature                             | 100(2) K                                                                         |                               |
| Wavelength                              | 0.71073 $\approx$                                                                |                               |
| Crystal system                          | Monoclinic                                                                       |                               |
| Space group                             | $\text{P2}_1$                                                                    |                               |
| Unit cell dimensions                    | $a = 8.9973(10) \approx$                                                         | $\alpha = 90^\circ$ .         |
|                                         | $b = 9.9788(11) \approx$                                                         | $\beta = 92.7026(16)^\circ$ . |
|                                         | $c = 20.810(2) \approx$                                                          | $\gamma = 90^\circ$ .         |
| Volume                                  | $1866.3(4) \approx^3$                                                            |                               |
| Z                                       | 2                                                                                |                               |
| Density (calculated)                    | 1.408 $\text{Mg}/\text{m}^3$                                                     |                               |
| Absorption coefficient                  | 2.693 $\text{mm}^{-1}$                                                           |                               |
| F(000)                                  | 816                                                                              |                               |
| Crystal size                            | 0.380 x 0.350 x 0.260 $\text{mm}^3$                                              |                               |
| Theta range for data collection         | 1.959 to 28.285 $^\circ$ .                                                       |                               |
| Index ranges                            | $-11 \leq h \leq 11, -13 \leq k \leq 13, -27 \leq l \leq 27$                     |                               |
| Reflections collected                   | 30407                                                                            |                               |
| Independent reflections                 | 9256 [ $R(\text{int}) = 0.0241$ ]                                                |                               |
| Completeness to theta = 25.242 $^\circ$ | 100.0 %                                                                          |                               |
| Absorption correction                   | Semi-empirical from equivalents                                                  |                               |
| Max. and min. transmission              | 0.7457 and 0.6609                                                                |                               |
| Refinement method                       | Full-matrix least-squares on $F^2$                                               |                               |
| Data / restraints / parameters          | 9256 / 110 / 451                                                                 |                               |
| Goodness-of-fit on $F^2$                | 1.025                                                                            |                               |
| Final R indices [ $I > 2\sigma(I)$ ]    | $R_1 = 0.0242, wR_2 = 0.0548$                                                    |                               |
| R indices (all data)                    | $R_1 = 0.0279, wR_2 = 0.0562$                                                    |                               |
| Absolute structure parameter            | -0.006(2)                                                                        |                               |
| Extinction coefficient                  | n/a                                                                              |                               |
| Largest diff. peak and hole             | 0.500 and -0.330 $\text{e} \cdot \text{\AA}^{-3}$                                |                               |

Table 2. Atomic coordinates ( $\times 10^4$ ) and equivalent isotropic displacement parameters ( $\approx 2 \times 10^3$ ) for  $c_{32}H_{40}Br_2N_4Ni(C_7H_8)$ .  $U(eq)$  is defined as one third of the trace of the orthogonalized  $U^{ij}$  tensor.

|       | x       | y        | z       | $U(eq)$ |
|-------|---------|----------|---------|---------|
| Br(1) | 2855(1) | 7770(1)  | 3215(1) | 25(1)   |
| Br(2) | 1887(1) | 3415(1)  | 1916(1) | 38(1)   |
| Ni(3) | 2370(1) | 5555(1)  | 2591(1) | 18(1)   |
| N(1)  | 1220(3) | 6696(3)  | 1868(1) | 20(1)   |
| N(2)  | 4240(3) | 5991(3)  | 2029(1) | 20(1)   |
| N(3)  | 3507(3) | 4406(3)  | 3322(1) | 26(1)   |
| N(4)  | 506(3)  | 5174(2)  | 3172(1) | 18(1)   |
| C(1)  | 2213(3) | 6917(3)  | 1328(1) | 17(1)   |
| C(2)  | 3818(3) | 7126(3)  | 1591(1) | 18(1)   |
| C(3)  | 1702(3) | 8061(3)  | 894(1)  | 19(1)   |
| C(4)  | 1589(3) | 7870(3)  | 229(1)  | 24(1)   |
| C(5)  | 1082(4) | 8902(3)  | -173(2) | 31(1)   |
| C(6)  | 707(4)  | 10122(4) | 82(2)   | 33(1)   |
| C(7)  | 845(4)  | 10335(3) | 741(2)  | 29(1)   |
| C(8)  | 1349(3) | 9302(3)  | 1139(1) | 25(1)   |
| C(9)  | 4871(3) | 7300(3)  | 1048(1) | 20(1)   |
| C(10) | 5684(3) | 8472(3)  | 997(2)  | 26(1)   |
| C(11) | 6619(4) | 8655(3)  | 490(2)  | 32(1)   |
| C(12) | 6734(4) | 7678(4)  | 30(2)   | 35(1)   |
| C(13) | 5944(4) | 6495(4)  | 82(2)   | 34(1)   |
| C(14) | 5021(3) | 6302(3)  | 592(2)  | 26(1)   |
| C(15) | 5717(3) | 6258(4)  | 2342(2) | 30(1)   |
| C(16) | -266(3) | 6266(4)  | 1614(2) | 35(1)   |
| C(17) | 2389(3) | 3721(3)  | 3710(1) | 19(1)   |
| C(18) | 1085(3) | 4668(3)  | 3807(1) | 16(1)   |
| C(19) | 3022(3) | 3227(3)  | 4359(1) | 17(1)   |
| C(20) | 2754(3) | 1932(3)  | 4565(1) | 20(1)   |
| C(21) | 3215(3) | 1522(3)  | 5182(1) | 23(1)   |
| C(22) | 3971(3) | 2398(3)  | 5589(1) | 24(1)   |

*Chierchia, Law, and Morken Supporting Information*

|       |          |          |          |       |
|-------|----------|----------|----------|-------|
| C(23) | 4281(3)  | 3691(3)  | 5386(1)  | 23(1) |
| C(24) | 3796(3)  | 4103(3)  | 4774(1)  | 21(1) |
| C(25) | -69(3)   | 4000(3)  | 4205(1)  | 16(1) |
| C(26) | -1039(3) | 3034(3)  | 3943(1)  | 22(1) |
| C(27) | -2046(3) | 2387(3)  | 4324(2)  | 26(1) |
| C(28) | -2079(3) | 2707(3)  | 4976(2)  | 27(1) |
| C(29) | -1121(3) | 3636(3)  | 5240(1)  | 25(1) |
| C(30) | -128(3)  | 4301(3)  | 4857(1)  | 20(1) |
| C(31) | 4656(5)  | 3416(5)  | 3155(2)  | 60(1) |
| C(32) | -612(3)  | 6235(3)  | 3279(1)  | 25(1) |
| C(1S) | 7142(12) | 1400(40) | 2086(18) | 55(2) |
| C(2S) | 6025(14) | 747(16)  | 2409(8)  | 48(2) |
| C(3S) | 6311(10) | -128(7)  | 2910(3)  | 41(1) |
| C(4S) | 7779(9)  | -402(7)  | 3093(4)  | 48(2) |
| C(5S) | 8944(9)  | 166(9)   | 2791(4)  | 56(2) |
| C(6S) | 8554(11) | 1091(11) | 2278(5)  | 65(2) |
| C(7S) | 6740(20) | 2360(20) | 1561(10) | 97(5) |
| C(1T) | 6820(20) | 1450(80) | 2030(30) | 55(2) |
| C(2T) | 6080(30) | 590(40)  | 2435(17) | 65(2) |
| C(3T) | 6882(18) | -201(18) | 2896(9)  | 56(2) |
| C(4T) | 8391(17) | -113(14) | 2944(7)  | 48(2) |
| C(5T) | 9146(14) | 746(14)  | 2540(7)  | 41(1) |
| C(6T) | 8326(17) | 1507(16) | 2097(7)  | 48(2) |
| C(7T) | 6080(40) | 2270(40) | 1502(19) | 97(5) |

---

Table 3. Bond lengths [ $\approx$ ] and angles [ $\infty$ ] for  $c32H40Br2N4Ni(C7H8)$ .

---

|             |           |
|-------------|-----------|
| Br(1)-Ni(3) | 2.5908(5) |
| Br(2)-Ni(3) | 2.5810(6) |
| Ni(3)-N(1)  | 2.116(2)  |
| Ni(3)-N(3)  | 2.128(3)  |
| Ni(3)-N(2)  | 2.138(2)  |
| Ni(3)-N(4)  | 2.148(2)  |
| N(1)-C(16)  | 1.478(4)  |
| N(1)-C(1)   | 1.485(3)  |
| N(1)-H(1N)  | 0.87(2)   |
| N(2)-C(15)  | 1.477(4)  |
| N(2)-C(2)   | 1.491(4)  |
| N(2)-H(2N)  | 0.86(2)   |
| N(3)-C(31)  | 1.483(5)  |
| N(3)-C(17)  | 1.486(4)  |
| N(3)-H(3N)  | 0.86(2)   |
| N(4)-C(32)  | 1.484(4)  |
| N(4)-C(18)  | 1.484(3)  |
| N(4)-H(4N)  | 0.85(2)   |
| C(1)-C(3)   | 1.514(4)  |
| C(1)-C(2)   | 1.534(4)  |
| C(1)-H(1)   | 1.0000    |
| C(2)-C(9)   | 1.519(4)  |
| C(2)-H(2)   | 1.0000    |
| C(3)-C(8)   | 1.382(4)  |
| C(3)-C(4)   | 1.395(4)  |
| C(4)-C(5)   | 1.390(4)  |
| C(4)-H(4)   | 0.9500    |
| C(5)-C(6)   | 1.377(5)  |
| C(5)-H(5)   | 0.9500    |
| C(6)-C(7)   | 1.387(4)  |
| C(6)-H(6)   | 0.9500    |
| C(7)-C(8)   | 1.385(4)  |



*Chierchia, Law, and Morken Supporting Information*

|              |          |
|--------------|----------|
| C(7)-H(7)    | 0.9500   |
| C(8)-H(8)    | 0.9500   |
| C(9)-C(10)   | 1.386(4) |
| C(9)-C(14)   | 1.386(4) |
| C(10)-C(11)  | 1.392(4) |
| C(10)-H(10)  | 0.9500   |
| C(11)-C(12)  | 1.375(5) |
| C(11)-H(11)  | 0.9500   |
| C(12)-C(13)  | 1.385(5) |
| C(12)-H(12)  | 0.9500   |
| C(13)-C(14)  | 1.391(4) |
| C(13)-H(13)  | 0.9500   |
| C(14)-H(14)  | 0.9500   |
| C(15)-H(15A) | 0.9800   |
| C(15)-H(15B) | 0.9800   |
| C(15)-H(15C) | 0.9800   |
| C(16)-H(16A) | 0.9800   |
| C(16)-H(16B) | 0.9800   |
| C(16)-H(16C) | 0.9800   |
| C(17)-C(19)  | 1.523(4) |
| C(17)-C(18)  | 1.528(4) |
| C(17)-H(17)  | 1.0000   |
| C(18)-C(25)  | 1.513(4) |
| C(18)-H(18)  | 1.0000   |
| C(19)-C(20)  | 1.387(4) |
| C(19)-C(24)  | 1.392(4) |
| C(20)-C(21)  | 1.392(4) |
| C(20)-H(20)  | 0.9500   |
| C(21)-C(22)  | 1.374(4) |
| C(21)-H(21)  | 0.9500   |
| C(22)-C(23)  | 1.390(4) |
| C(22)-H(22)  | 0.9500   |
| C(23)-C(24)  | 1.389(4) |
| C(23)-H(23)  | 0.9500   |

*Chierchia, Law, and Morken Supporting Information*

|              |           |
|--------------|-----------|
| C(24)-H(24)  | 0.9500    |
| C(25)-C(30)  | 1.391(4)  |
| C(25)-C(26)  | 1.395(4)  |
| C(26)-C(27)  | 1.391(4)  |
| C(26)-H(26)  | 0.9500    |
| C(27)-C(28)  | 1.394(4)  |
| C(27)-H(27)  | 0.9500    |
| C(28)-C(29)  | 1.364(5)  |
| C(28)-H(28)  | 0.9500    |
| C(29)-C(30)  | 1.393(4)  |
| C(29)-H(29)  | 0.9500    |
| C(30)-H(30)  | 0.9500    |
| C(31)-H(31A) | 0.9800    |
| C(31)-H(31B) | 0.9800    |
| C(31)-H(31C) | 0.9800    |
| C(32)-H(32A) | 0.9800    |
| C(32)-H(32B) | 0.9800    |
| C(32)-H(32C) | 0.9800    |
| C(1S)-C(6S)  | 1.348(13) |
| C(1S)-C(2S)  | 1.394(11) |
| C(1S)-C(7S)  | 1.491(13) |
| C(2S)-C(3S)  | 1.375(11) |
| C(2S)-H(2S)  | 0.9500    |
| C(3S)-C(4S)  | 1.384(10) |
| C(3S)-H(3S)  | 0.9500    |
| C(4S)-C(5S)  | 1.369(9)  |
| C(4S)-H(4S)  | 0.9500    |
| C(5S)-C(6S)  | 1.442(12) |
| C(5S)-H(5S)  | 0.9500    |
| C(6S)-H(6S)  | 0.9500    |
| C(7S)-H(7S1) | 0.9800    |
| C(7S)-H(7S2) | 0.9800    |
| C(7S)-H(7S3) | 0.9800    |
| C(1T)-C(6T)  | 1.361(18) |

*Chierchia, Law, and Morken Supporting Information*

|                   |             |
|-------------------|-------------|
| C(1T)-C(2T)       | 1.394(18)   |
| C(1T)-C(7T)       | 1.502(18)   |
| C(2T)-C(3T)       | 1.414(19)   |
| C(2T)-H(2T)       | 0.9500      |
| C(3T)-C(4T)       | 1.359(16)   |
| C(3T)-H(3T)       | 0.9500      |
| C(4T)-C(5T)       | 1.398(16)   |
| C(4T)-H(4T)       | 0.9500      |
| C(5T)-C(6T)       | 1.382(17)   |
| C(5T)-H(5T)       | 0.9500      |
| C(6T)-H(6T)       | 0.9500      |
| C(7T)-H(7T1)      | 0.9800      |
| C(7T)-H(7T2)      | 0.9800      |
| C(7T)-H(7T3)      | 0.9800      |
|                   |             |
| N(1)-Ni(3)-N(3)   | 179.47(10)  |
| N(1)-Ni(3)-N(2)   | 82.69(9)    |
| N(3)-Ni(3)-N(2)   | 97.84(9)    |
| N(1)-Ni(3)-N(4)   | 97.30(9)    |
| N(3)-Ni(3)-N(4)   | 82.17(9)    |
| N(2)-Ni(3)-N(4)   | 178.16(11)  |
| N(1)-Ni(3)-Br(2)  | 89.70(7)    |
| N(3)-Ni(3)-Br(2)  | 90.35(9)    |
| N(2)-Ni(3)-Br(2)  | 89.30(7)    |
| N(4)-Ni(3)-Br(2)  | 92.55(7)    |
| N(1)-Ni(3)-Br(1)  | 87.83(7)    |
| N(3)-Ni(3)-Br(1)  | 92.12(9)    |
| N(2)-Ni(3)-Br(1)  | 88.96(7)    |
| N(4)-Ni(3)-Br(1)  | 89.20(7)    |
| Br(2)-Ni(3)-Br(1) | 177.144(18) |
| C(16)-N(1)-C(1)   | 109.7(2)    |
| C(16)-N(1)-Ni(3)  | 120.1(2)    |
| C(1)-N(1)-Ni(3)   | 109.06(17)  |
| C(16)-N(1)-H(1N)  | 107(2)      |

*Chierchia, Law, and Morken Supporting Information*

|                  |            |
|------------------|------------|
| C(1)-N(1)-H(1N)  | 107(2)     |
| Ni(3)-N(1)-H(1N) | 103(2)     |
| C(15)-N(2)-C(2)  | 109.3(2)   |
| C(15)-N(2)-Ni(3) | 120.68(18) |
| C(2)-N(2)-Ni(3)  | 107.75(17) |
| C(15)-N(2)-H(2N) | 111(2)     |
| C(2)-N(2)-H(2N)  | 106(2)     |
| Ni(3)-N(2)-H(2N) | 101(2)     |
| C(31)-N(3)-C(17) | 108.5(3)   |
| C(31)-N(3)-Ni(3) | 120.6(2)   |
| C(17)-N(3)-Ni(3) | 108.76(17) |
| C(31)-N(3)-H(3N) | 108(3)     |
| C(17)-N(3)-H(3N) | 110(3)     |
| Ni(3)-N(3)-H(3N) | 101(3)     |
| C(32)-N(4)-C(18) | 108.7(2)   |
| C(32)-N(4)-Ni(3) | 120.72(18) |
| C(18)-N(4)-Ni(3) | 108.11(16) |
| C(32)-N(4)-H(4N) | 109(2)     |
| C(18)-N(4)-H(4N) | 106(2)     |
| Ni(3)-N(4)-H(4N) | 104(2)     |
| N(1)-C(1)-C(3)   | 112.8(2)   |
| N(1)-C(1)-C(2)   | 109.9(2)   |
| C(3)-C(1)-C(2)   | 111.4(2)   |
| N(1)-C(1)-H(1)   | 107.5      |
| C(3)-C(1)-H(1)   | 107.5      |
| C(2)-C(1)-H(1)   | 107.5      |
| N(2)-C(2)-C(9)   | 113.1(2)   |
| N(2)-C(2)-C(1)   | 108.8(2)   |
| C(9)-C(2)-C(1)   | 111.1(2)   |
| N(2)-C(2)-H(2)   | 107.9      |
| C(9)-C(2)-H(2)   | 107.9      |
| C(1)-C(2)-H(2)   | 107.9      |
| C(8)-C(3)-C(4)   | 118.7(3)   |
| C(8)-C(3)-C(1)   | 121.6(2)   |

*Chierchia, Law, and Morken Supporting Information*

|                   |          |
|-------------------|----------|
| C(4)-C(3)-C(1)    | 119.7(3) |
| C(5)-C(4)-C(3)    | 120.2(3) |
| C(5)-C(4)-H(4)    | 119.9    |
| C(3)-C(4)-H(4)    | 119.9    |
| C(6)-C(5)-C(4)    | 120.1(3) |
| C(6)-C(5)-H(5)    | 119.9    |
| C(4)-C(5)-H(5)    | 119.9    |
| C(5)-C(6)-C(7)    | 120.3(3) |
| C(5)-C(6)-H(6)    | 119.9    |
| C(7)-C(6)-H(6)    | 119.9    |
| C(8)-C(7)-C(6)    | 119.3(3) |
| C(8)-C(7)-H(7)    | 120.4    |
| C(6)-C(7)-H(7)    | 120.4    |
| C(3)-C(8)-C(7)    | 121.4(3) |
| C(3)-C(8)-H(8)    | 119.3    |
| C(7)-C(8)-H(8)    | 119.3    |
| C(10)-C(9)-C(14)  | 119.1(3) |
| C(10)-C(9)-C(2)   | 120.2(3) |
| C(14)-C(9)-C(2)   | 120.8(3) |
| C(9)-C(10)-C(11)  | 120.5(3) |
| C(9)-C(10)-H(10)  | 119.7    |
| C(11)-C(10)-H(10) | 119.7    |
| C(12)-C(11)-C(10) | 120.2(3) |
| C(12)-C(11)-H(11) | 119.9    |
| C(10)-C(11)-H(11) | 119.9    |
| C(11)-C(12)-C(13) | 119.6(3) |
| C(11)-C(12)-H(12) | 120.2    |
| C(13)-C(12)-H(12) | 120.2    |
| C(12)-C(13)-C(14) | 120.3(3) |
| C(12)-C(13)-H(13) | 119.8    |
| C(14)-C(13)-H(13) | 119.8    |
| C(9)-C(14)-C(13)  | 120.2(3) |
| C(9)-C(14)-H(14)  | 119.9    |
| C(13)-C(14)-H(14) | 119.9    |

*Chierchia, Law, and Morken Supporting Information*

|                     |          |
|---------------------|----------|
| N(2)-C(15)-H(15A)   | 109.5    |
| N(2)-C(15)-H(15B)   | 109.5    |
| H(15A)-C(15)-H(15B) | 109.5    |
| N(2)-C(15)-H(15C)   | 109.5    |
| H(15A)-C(15)-H(15C) | 109.5    |
| H(15B)-C(15)-H(15C) | 109.5    |
| N(1)-C(16)-H(16A)   | 109.5    |
| N(1)-C(16)-H(16B)   | 109.5    |
| H(16A)-C(16)-H(16B) | 109.5    |
| N(1)-C(16)-H(16C)   | 109.5    |
| H(16A)-C(16)-H(16C) | 109.5    |
| H(16B)-C(16)-H(16C) | 109.5    |
| N(3)-C(17)-C(19)    | 113.4(2) |
| N(3)-C(17)-C(18)    | 109.3(2) |
| C(19)-C(17)-C(18)   | 109.9(2) |
| N(3)-C(17)-H(17)    | 108.0    |
| C(19)-C(17)-H(17)   | 108.0    |
| C(18)-C(17)-H(17)   | 108.0    |
| N(4)-C(18)-C(25)    | 114.6(2) |
| N(4)-C(18)-C(17)    | 109.4(2) |
| C(25)-C(18)-C(17)   | 110.5(2) |
| N(4)-C(18)-H(18)    | 107.3    |
| C(25)-C(18)-H(18)   | 107.3    |
| C(17)-C(18)-H(18)   | 107.3    |
| C(20)-C(19)-C(24)   | 118.9(3) |
| C(20)-C(19)-C(17)   | 120.8(2) |
| C(24)-C(19)-C(17)   | 120.2(2) |
| C(19)-C(20)-C(21)   | 120.7(3) |
| C(19)-C(20)-H(20)   | 119.7    |
| C(21)-C(20)-H(20)   | 119.7    |
| C(22)-C(21)-C(20)   | 120.0(3) |
| C(22)-C(21)-H(21)   | 120.0    |
| C(20)-C(21)-H(21)   | 120.0    |
| C(21)-C(22)-C(23)   | 120.2(3) |



*Chierchia, Law, and Morken Supporting Information*

|                     |          |
|---------------------|----------|
| C(21)-C(22)-H(22)   | 119.9    |
| C(23)-C(22)-H(22)   | 119.9    |
| C(24)-C(23)-C(22)   | 119.7(3) |
| C(24)-C(23)-H(23)   | 120.2    |
| C(22)-C(23)-H(23)   | 120.2    |
| C(23)-C(24)-C(19)   | 120.6(3) |
| C(23)-C(24)-H(24)   | 119.7    |
| C(19)-C(24)-H(24)   | 119.7    |
| C(30)-C(25)-C(26)   | 118.5(3) |
| C(30)-C(25)-C(18)   | 119.8(3) |
| C(26)-C(25)-C(18)   | 121.5(2) |
| C(27)-C(26)-C(25)   | 120.7(3) |
| C(27)-C(26)-H(26)   | 119.6    |
| C(25)-C(26)-H(26)   | 119.6    |
| C(26)-C(27)-C(28)   | 119.5(3) |
| C(26)-C(27)-H(27)   | 120.3    |
| C(28)-C(27)-H(27)   | 120.3    |
| C(29)-C(28)-C(27)   | 120.4(3) |
| C(29)-C(28)-H(28)   | 119.8    |
| C(27)-C(28)-H(28)   | 119.8    |
| C(28)-C(29)-C(30)   | 120.2(3) |
| C(28)-C(29)-H(29)   | 119.9    |
| C(30)-C(29)-H(29)   | 119.9    |
| C(25)-C(30)-C(29)   | 120.7(3) |
| C(25)-C(30)-H(30)   | 119.7    |
| C(29)-C(30)-H(30)   | 119.7    |
| N(3)-C(31)-H(31A)   | 109.5    |
| N(3)-C(31)-H(31B)   | 109.5    |
| H(31A)-C(31)-H(31B) | 109.5    |
| N(3)-C(31)-H(31C)   | 109.5    |
| H(31A)-C(31)-H(31C) | 109.5    |
| H(31B)-C(31)-H(31C) | 109.5    |
| N(4)-C(32)-H(32A)   | 109.5    |
| N(4)-C(32)-H(32B)   | 109.5    |

*Chierchia, Law, and Morken Supporting Information*

|                     |           |
|---------------------|-----------|
| H(32A)-C(32)-H(32B) | 109.5     |
| N(4)-C(32)-H(32C)   | 109.5     |
| H(32A)-C(32)-H(32C) | 109.5     |
| H(32B)-C(32)-H(32C) | 109.5     |
| C(6S)-C(1S)-C(2S)   | 116.4(11) |
| C(6S)-C(1S)-C(7S)   | 123.8(11) |
| C(2S)-C(1S)-C(7S)   | 119.9(11) |
| C(3S)-C(2S)-C(1S)   | 123.1(11) |
| C(3S)-C(2S)-H(2S)   | 118.4     |
| C(1S)-C(2S)-H(2S)   | 118.4     |
| C(2S)-C(3S)-C(4S)   | 118.4(8)  |
| C(2S)-C(3S)-H(3S)   | 120.8     |
| C(4S)-C(3S)-H(3S)   | 120.8     |
| C(5S)-C(4S)-C(3S)   | 122.2(8)  |
| C(5S)-C(4S)-H(4S)   | 118.9     |
| C(3S)-C(4S)-H(4S)   | 118.9     |
| C(4S)-C(5S)-C(6S)   | 116.1(8)  |
| C(4S)-C(5S)-H(5S)   | 122.0     |
| C(6S)-C(5S)-H(5S)   | 122.0     |
| C(1S)-C(6S)-C(5S)   | 123.8(9)  |
| C(1S)-C(6S)-H(6S)   | 118.1     |
| C(5S)-C(6S)-H(6S)   | 118.1     |
| C(1S)-C(7S)-H(7S1)  | 109.4     |
| C(1S)-C(7S)-H(7S2)  | 109.5     |
| H(7S1)-C(7S)-H(7S2) | 109.5     |
| C(1S)-C(7S)-H(7S3)  | 109.5     |
| H(7S1)-C(7S)-H(7S3) | 109.5     |
| H(7S2)-C(7S)-H(7S3) | 109.5     |
| C(6T)-C(1T)-C(2T)   | 117.9(18) |
| C(6T)-C(1T)-C(7T)   | 117.0(19) |
| C(2T)-C(1T)-C(7T)   | 125(2)    |
| C(1T)-C(2T)-C(3T)   | 120.6(19) |
| C(1T)-C(2T)-H(2T)   | 119.7     |
| C(3T)-C(2T)-H(2T)   | 119.7     |

*Chierchia, Law, and Morken Supporting Information*

|                     |           |
|---------------------|-----------|
| C(4T)-C(3T)-C(2T)   | 119.5(16) |
| C(4T)-C(3T)-H(3T)   | 120.2     |
| C(2T)-C(3T)-H(3T)   | 120.2     |
| C(3T)-C(4T)-C(5T)   | 120.5(14) |
| C(3T)-C(4T)-H(4T)   | 119.8     |
| C(5T)-C(4T)-H(4T)   | 119.8     |
| C(6T)-C(5T)-C(4T)   | 118.6(12) |
| C(6T)-C(5T)-H(5T)   | 120.7     |
| C(4T)-C(5T)-H(5T)   | 120.7     |
| C(1T)-C(6T)-C(5T)   | 122.9(15) |
| C(1T)-C(6T)-H(6T)   | 118.6     |
| C(5T)-C(6T)-H(6T)   | 118.5     |
| C(1T)-C(7T)-H(7T1)  | 109.6     |
| C(1T)-C(7T)-H(7T2)  | 109.5     |
| H(7T1)-C(7T)-H(7T2) | 109.5     |
| C(1T)-C(7T)-H(7T3)  | 109.4     |
| H(7T1)-C(7T)-H(7T3) | 109.5     |
| H(7T2)-C(7T)-H(7T3) | 109.5     |

---

Symmetry transformations used to generate equivalent atoms:

Table 4. Anisotropic displacement parameters ( $\approx 2 \times 10^3$ ) for  $c_{32}H_{40}Br_2N_4Ni(C_7H_8)$ . The anisotropic displacement factor exponent takes the form:  $-2\pi^2 [ h^2 a^{*2}U^{11} + \dots + 2 h k a^* b^* U^{12} ]$ 

|       | U <sup>11</sup> | U <sup>22</sup> | U <sup>33</sup> | U <sup>23</sup> | U <sup>13</sup> | U <sup>12</sup> |
|-------|-----------------|-----------------|-----------------|-----------------|-----------------|-----------------|
| Br(1) | 22(1)           | 37(1)           | 17(1)           | -7(1)           | -1(1)           | -1(1)           |
| Br(2) | 50(1)           | 30(1)           | 35(1)           | -10(1)          | 19(1)           | -13(1)          |
| Ni(3) | 17(1)           | 25(1)           | 12(1)           | 2(1)            | 3(1)            | 1(1)            |
| N(1)  | 14(1)           | 34(1)           | 11(1)           | -1(1)           | 1(1)            | -3(1)           |
| N(2)  | 17(1)           | 24(1)           | 18(1)           | 1(1)            | 0(1)            | 0(1)            |
| N(3)  | 18(1)           | 37(2)           | 24(1)           | 12(1)           | 8(1)            | 9(1)            |
| N(4)  | 18(1)           | 24(1)           | 12(1)           | 3(1)            | 1(1)            | 3(1)            |
| C(1)  | 16(1)           | 24(1)           | 11(1)           | -1(1)           | 3(1)            | -2(1)           |
| C(2)  | 15(1)           | 22(1)           | 15(1)           | 1(1)            | 2(1)            | -2(1)           |
| C(3)  | 16(1)           | 26(2)           | 15(1)           | 2(1)            | 1(1)            | -2(1)           |
| C(4)  | 28(1)           | 28(2)           | 16(1)           | -2(1)           | 1(1)            | -2(1)           |
| C(5)  | 41(2)           | 37(2)           | 15(1)           | 4(1)            | -1(1)           | 2(2)            |
| C(6)  | 38(2)           | 36(2)           | 26(2)           | 11(1)           | 1(1)            | 6(1)            |
| C(7)  | 33(2)           | 27(2)           | 28(2)           | 0(1)            | 7(1)            | 5(1)            |
| C(8)  | 28(2)           | 31(2)           | 15(1)           | -2(1)           | 4(1)            | 1(1)            |
| C(9)  | 16(1)           | 26(2)           | 18(1)           | 1(1)            | 4(1)            | 1(1)            |
| C(10) | 27(2)           | 24(1)           | 28(2)           | 0(1)            | 7(1)            | -1(1)           |
| C(11) | 30(2)           | 26(2)           | 40(2)           | 5(1)            | 13(2)           | -4(1)           |
| C(12) | 34(2)           | 40(2)           | 32(2)           | 6(2)            | 20(1)           | 3(2)            |
| C(13) | 35(2)           | 39(2)           | 29(2)           | -9(1)           | 16(1)           | -1(2)           |
| C(14) | 25(2)           | 28(2)           | 28(2)           | -3(1)           | 9(1)            | 0(1)            |
| C(15) | 17(1)           | 43(2)           | 31(2)           | 9(1)            | -3(1)           | -2(1)           |
| C(16) | 17(2)           | 70(3)           | 18(2)           | 3(2)            | 0(1)            | -12(2)          |
| C(17) | 18(1)           | 22(1)           | 17(1)           | 2(1)            | 4(1)            | 4(1)            |
| C(18) | 15(1)           | 20(1)           | 12(1)           | 2(1)            | 0(1)            | 0(1)            |
| C(19) | 13(1)           | 20(1)           | 17(1)           | 1(1)            | 2(1)            | 5(1)            |
| C(20) | 17(1)           | 20(1)           | 22(1)           | 1(1)            | -2(1)           | 0(1)            |
| C(21) | 21(1)           | 21(1)           | 27(2)           | 8(1)            | -1(1)           | -1(1)           |
| C(22) | 18(1)           | 32(2)           | 21(1)           | 7(1)            | -2(1)           | 4(1)            |

*Chierchia, Law, and Morken Supporting Information*

|       |         |       |       |        |       |         |
|-------|---------|-------|-------|--------|-------|---------|
| C(23) | 20(1)   | 27(2) | 22(1) | -4(1)  | -2(1) | 0(1)    |
| C(24) | 18(1)   | 21(1) | 24(2) | 4(1)   | 1(1)  | 0(1)    |
| C(25) | 14(1)   | 18(1) | 16(1) | 4(1)   | 2(1)  | 4(1)    |
| C(26) | 21(1)   | 24(2) | 21(1) | 2(1)   | -2(1) | 1(1)    |
| C(27) | 19(1)   | 21(2) | 38(2) | 6(1)   | -4(1) | -2(1)   |
| C(28) | 21(1)   | 23(2) | 38(2) | 14(1)  | 11(1) | 6(1)    |
| C(29) | 31(2)   | 23(2) | 22(1) | 6(1)   | 10(1) | 7(1)    |
| C(30) | 21(1)   | 20(1) | 18(1) | 2(1)   | 3(1)  | 2(1)    |
| C(31) | 50(2)   | 78(3) | 55(2) | 39(2)  | 34(2) | 45(2)   |
| C(32) | 21(1)   | 36(2) | 18(1) | 8(1)   | 4(1)  | 10(1)   |
| C(1S) | 81(5)   | 45(4) | 42(6) | -24(3) | 29(8) | -24(9)  |
| C(2S) | 66(4)   | 45(5) | 34(3) | -17(3) | 19(3) | -6(3)   |
| C(3S) | 48(3)   | 32(3) | 47(3) | -13(2) | 28(3) | -14(3)  |
| C(4S) | 41(5)   | 39(3) | 68(4) | -17(3) | 33(3) | -7(3)   |
| C(5S) | 46(4)   | 57(4) | 70(4) | -33(3) | 38(3) | -24(3)  |
| C(6S) | 74(5)   | 68(7) | 57(6) | -31(4) | 32(4) | -33(4)  |
| C(7S) | 179(17) | 76(5) | 37(5) | -11(4) | 25(9) | -18(10) |
| C(1T) | 81(5)   | 45(4) | 42(6) | -24(3) | 29(8) | -24(9)  |
| C(2T) | 74(5)   | 68(7) | 57(6) | -31(4) | 32(4) | -33(4)  |
| C(3T) | 46(4)   | 57(4) | 70(4) | -33(3) | 38(3) | -24(3)  |
| C(4T) | 41(5)   | 39(3) | 68(4) | -17(3) | 33(3) | -7(3)   |
| C(5T) | 48(3)   | 32(3) | 47(3) | -13(2) | 28(3) | -14(3)  |
| C(6T) | 66(4)   | 45(5) | 34(3) | -17(3) | 19(3) | -6(3)   |
| C(7T) | 179(17) | 76(5) | 37(5) | -11(4) | 25(9) | -18(10) |

---

Table 5. Hydrogen coordinates ( $\times 10^4$ ) and isotropic displacement parameters ( $\approx 2 \times 10^{-3}$ ) for  $c_{32}H_{40}Br_2N_4Ni(C_7H_8)$ .

|        | x        | y        | z        | U(eq) |
|--------|----------|----------|----------|-------|
| H(1N)  | 1100(40) | 7460(30) | 2056(15) | 23    |
| H(2N)  | 4270(40) | 5290(30) | 1789(14) | 23    |
| H(3N)  | 3930(40) | 5030(30) | 3546(16) | 32    |
| H(4N)  | 70(30)   | 4510(30) | 2990(15) | 22    |
| H(1)   | 2195     | 6082     | 1062     | 20    |
| H(2)   | 3846     | 7968     | 1852     | 21    |
| H(4)   | 1858     | 7034     | 51       | 29    |
| H(5)   | 995      | 8765     | -625     | 37    |
| H(6)   | 352      | 10822    | -194     | 40    |
| H(7)   | 597      | 11180    | 917      | 35    |
| H(8)   | 1454     | 9450     | 1590     | 29    |
| H(10)  | 5604     | 9156     | 1312     | 31    |
| H(11)  | 7179     | 9459     | 462      | 38    |
| H(12)  | 7352     | 7813     | -322     | 42    |
| H(13)  | 6032     | 5812     | -232     | 41    |
| H(14)  | 4493     | 5484     | 628      | 32    |
| H(15A) | 5996     | 5513     | 2630     | 45    |
| H(15B) | 6455     | 6347     | 2013     | 45    |
| H(15C) | 5680     | 7090     | 2591     | 45    |
| H(16A) | -917     | 6122     | 1971     | 53    |
| H(16B) | -692     | 6962     | 1328     | 53    |
| H(16C) | -172     | 5430     | 1372     | 53    |
| H(17)  | 2005     | 2926     | 3460     | 23    |
| H(18)  | 1481     | 5456     | 4057     | 19    |
| H(20)  | 2251     | 1317     | 4282     | 24    |
| H(21)  | 3007     | 639      | 5322     | 27    |
| H(22)  | 4283     | 2118     | 6010     | 29    |
| H(23)  | 4822     | 4290     | 5664     | 28    |



*Chierchia, Law, and Morken Supporting Information*

|        |       |       |      |     |
|--------|-------|-------|------|-----|
| H(24)  | 3994  | 4991  | 4637 | 25  |
| H(26)  | -1013 | 2815  | 3500 | 27  |
| H(27)  | -2706 | 1731  | 4142 | 31  |
| H(28)  | -2773 | 2276  | 5237 | 33  |
| H(29)  | -1130 | 3831  | 5687 | 30  |
| H(30)  | 516   | 4965  | 5042 | 23  |
| H(31A) | 5403  | 3853  | 2899 | 90  |
| H(31B) | 5138  | 3056  | 3551 | 90  |
| H(31C) | 4188  | 2683  | 2906 | 90  |
| H(32A) | -1002 | 6576  | 2863 | 37  |
| H(32B) | -1429 | 5860  | 3517 | 37  |
| H(32C) | -142  | 6968  | 3527 | 37  |
| H(2S)  | 5018  | 918   | 2276 | 57  |
| H(3S)  | 5520  | -536  | 3125 | 50  |
| H(4S)  | 7986  | -1004 | 3439 | 58  |
| H(5S)  | 9949  | -36   | 2913 | 68  |
| H(6S)  | 9337  | 1510  | 2062 | 78  |
| H(7S1) | 7371  | 3162  | 1608 | 145 |
| H(7S2) | 5693  | 2624  | 1586 | 145 |
| H(7S3) | 6890  | 1943  | 1143 | 145 |
| H(2T)  | 5022  | 526   | 2400 | 78  |
| H(3T)  | 6373  | -788  | 3170 | 68  |
| H(4T)  | 8937  | -639  | 3254 | 58  |
| H(5T)  | 10201 | 804   | 2570 | 50  |
| H(6T)  | 8840  | 2097  | 1826 | 57  |
| H(7T1) | 6286  | 3226  | 1583 | 145 |
| H(7T2) | 5004  | 2121  | 1491 | 145 |
| H(7T3) | 6473  | 2014  | 1089 | 145 |

---

Table 6. Torsion angles [ $^{\circ}$ ] for c32H40Br2N4Ni(C7H8).

---

|                         |             |
|-------------------------|-------------|
| C(16)-N(1)-C(1)-C(3)    | 64.8(3)     |
| Ni(3)-N(1)-C(1)-C(3)    | -161.78(18) |
| C(16)-N(1)-C(1)-C(2)    | -170.3(3)   |
| Ni(3)-N(1)-C(1)-C(2)    | -36.9(3)    |
| C(15)-N(2)-C(2)-C(9)    | 62.4(3)     |
| Ni(3)-N(2)-C(2)-C(9)    | -164.73(19) |
| C(15)-N(2)-C(2)-C(1)    | -173.6(2)   |
| Ni(3)-N(2)-C(2)-C(1)    | -40.7(2)    |
| N(1)-C(1)-C(2)-N(2)     | 52.6(3)     |
| C(3)-C(1)-C(2)-N(2)     | 178.3(2)    |
| N(1)-C(1)-C(2)-C(9)     | 177.8(2)    |
| C(3)-C(1)-C(2)-C(9)     | -56.5(3)    |
| N(1)-C(1)-C(3)-C(8)     | 49.9(4)     |
| C(2)-C(1)-C(3)-C(8)     | -74.2(3)    |
| N(1)-C(1)-C(3)-C(4)     | -130.5(3)   |
| C(2)-C(1)-C(3)-C(4)     | 105.4(3)    |
| C(8)-C(3)-C(4)-C(5)     | -2.1(4)     |
| C(1)-C(3)-C(4)-C(5)     | 178.3(3)    |
| C(3)-C(4)-C(5)-C(6)     | 0.8(5)      |
| C(4)-C(5)-C(6)-C(7)     | 0.6(5)      |
| C(5)-C(6)-C(7)-C(8)     | -0.7(5)     |
| C(4)-C(3)-C(8)-C(7)     | 2.1(4)      |
| C(1)-C(3)-C(8)-C(7)     | -178.3(3)   |
| C(6)-C(7)-C(8)-C(3)     | -0.7(5)     |
| N(2)-C(2)-C(9)-C(10)    | -117.7(3)   |
| C(1)-C(2)-C(9)-C(10)    | 119.6(3)    |
| N(2)-C(2)-C(9)-C(14)    | 63.1(3)     |
| C(1)-C(2)-C(9)-C(14)    | -59.7(3)    |
| C(14)-C(9)-C(10)-C(11)  | 1.2(5)      |
| C(2)-C(9)-C(10)-C(11)   | -178.1(3)   |
| C(9)-C(10)-C(11)-C(12)  | 0.6(5)      |
| C(10)-C(11)-C(12)-C(13) | -1.6(5)     |

*Chierchia, Law, and Morken Supporting Information*

|                         |             |
|-------------------------|-------------|
| C(11)-C(12)-C(13)-C(14) | 0.9(5)      |
| C(10)-C(9)-C(14)-C(13)  | -1.9(5)     |
| C(2)-C(9)-C(14)-C(13)   | 177.4(3)    |
| C(12)-C(13)-C(14)-C(9)  | 0.8(5)      |
| C(31)-N(3)-C(17)-C(19)  | 64.9(4)     |
| Ni(3)-N(3)-C(17)-C(19)  | -162.26(19) |
| C(31)-N(3)-C(17)-C(18)  | -172.2(3)   |
| Ni(3)-N(3)-C(17)-C(18)  | -39.3(3)    |
| C(32)-N(4)-C(18)-C(25)  | 63.2(3)     |
| Ni(3)-N(4)-C(18)-C(25)  | -164.10(18) |
| C(32)-N(4)-C(18)-C(17)  | -172.1(2)   |
| Ni(3)-N(4)-C(18)-C(17)  | -39.3(2)    |
| N(3)-C(17)-C(18)-N(4)   | 53.3(3)     |
| C(19)-C(17)-C(18)-N(4)  | 178.3(2)    |
| N(3)-C(17)-C(18)-C(25)  | -179.6(2)   |
| C(19)-C(17)-C(18)-C(25) | -54.6(3)    |
| N(3)-C(17)-C(19)-C(20)  | -131.9(3)   |
| C(18)-C(17)-C(19)-C(20) | 105.5(3)    |
| N(3)-C(17)-C(19)-C(24)  | 52.5(3)     |
| C(18)-C(17)-C(19)-C(24) | -70.1(3)    |
| C(24)-C(19)-C(20)-C(21) | 1.7(4)      |
| C(17)-C(19)-C(20)-C(21) | -174.0(3)   |
| C(19)-C(20)-C(21)-C(22) | -1.3(5)     |
| C(20)-C(21)-C(22)-C(23) | -0.2(4)     |
| C(21)-C(22)-C(23)-C(24) | 1.3(4)      |
| C(22)-C(23)-C(24)-C(19) | -1.0(4)     |
| C(20)-C(19)-C(24)-C(23) | -0.5(4)     |
| C(17)-C(19)-C(24)-C(23) | 175.2(2)    |
| N(4)-C(18)-C(25)-C(30)  | -135.0(3)   |
| C(17)-C(18)-C(25)-C(30) | 100.8(3)    |
| N(4)-C(18)-C(25)-C(26)  | 48.1(4)     |
| C(17)-C(18)-C(25)-C(26) | -76.1(3)    |
| C(30)-C(25)-C(26)-C(27) | 0.1(4)      |
| C(18)-C(25)-C(26)-C(27) | 177.0(3)    |

*Chierchia, Law, and Morken Supporting Information*

|                         |           |
|-------------------------|-----------|
| C(25)-C(26)-C(27)-C(28) | -0.2(4)   |
| C(26)-C(27)-C(28)-C(29) | -0.8(4)   |
| C(27)-C(28)-C(29)-C(30) | 1.8(4)    |
| C(26)-C(25)-C(30)-C(29) | 0.9(4)    |
| C(18)-C(25)-C(30)-C(29) | -176.1(3) |
| C(28)-C(29)-C(30)-C(25) | -1.9(4)   |
| C(6S)-C(1S)-C(2S)-C(3S) | 2(6)      |
| C(7S)-C(1S)-C(2S)-C(3S) | -178(3)   |
| C(1S)-C(2S)-C(3S)-C(4S) | -2(4)     |
| C(2S)-C(3S)-C(4S)-C(5S) | -0.1(14)  |
| C(3S)-C(4S)-C(5S)-C(6S) | 1.2(10)   |
| C(2S)-C(1S)-C(6S)-C(5S) | -1(5)     |
| C(7S)-C(1S)-C(6S)-C(5S) | 179(3)    |
| C(4S)-C(5S)-C(6S)-C(1S) | -1(3)     |
| C(6T)-C(1T)-C(2T)-C(3T) | 0(10)     |
| C(7T)-C(1T)-C(2T)-C(3T) | 177(6)    |
| C(1T)-C(2T)-C(3T)-C(4T) | 0(7)      |
| C(2T)-C(3T)-C(4T)-C(5T) | 0(3)      |
| C(3T)-C(4T)-C(5T)-C(6T) | 1(2)      |
| C(2T)-C(1T)-C(6T)-C(5T) | 0(10)     |
| C(7T)-C(1T)-C(6T)-C(5T) | -176(4)   |
| C(4T)-C(5T)-C(6T)-C(1T) | -1(5)     |

---

Symmetry transformations used to generate equivalent atoms:

Table 7. Hydrogen bonds for  $c_{32}H_{40}Br_2N_4Ni(C_7H_8)$  [ $\approx$  and  $\infty$ ].

| D-H...A            | d(D-H)  | d(H...A) | d(D...A) | <(DHA) |
|--------------------|---------|----------|----------|--------|
| N(1)-H(1N)...Br(1) | 0.87(2) | 2.84(3)  | 3.283(2) | 114(2) |
| N(2)-H(2N)...Br(2) | 0.86(2) | 2.86(3)  | 3.332(3) | 116(3) |
| N(3)-H(3N)...Br(1) | 0.86(2) | 2.97(4)  | 3.413(3) | 114(3) |
| N(4)-H(4N)...Br(2) | 0.85(2) | 3.04(3)  | 3.430(2) | 111(3) |

Symmetry transformations used to generate equivalent atoms:
